# Supplementary material for: Utilizing bioinformatics to identify biomarkers and analyze their expression in relation to immune cell ratios in femoral head necrosis
Source: Front Physiol. 2025 Apr 16;16:1373721. doi: 10.3389/fphys.2025.1373721 (PMC12040900; doi:10.3389/fphys.2025.1373721)
Supplement: Supplementary file 1 [file Table2.xlsx]

## Sheet: GSE123568-exp
Symbol	ID	GSM3507251	GSM3507252	GSM3507253	GSM3507254	GSM3507255	GSM3507256	GSM3507257	GSM3507258	GSM3507259	GSM3507260	GSM3507261	GSM3507262	GSM3507263	GSM3507264	GSM3507265	GSM3507266	GSM3507267	GSM3507268	GSM3507269	GSM3507270	GSM3507271	GSM3507272	GSM3507273	GSM3507274	GSM3507275	GSM3507276	GSM3507277	GSM3507278	GSM3507279	GSM3507280	GSM3507281	GSM3507282	GSM3507283	GSM3507284	GSM3507285	GSM3507286	GSM3507287	GSM3507288	GSM3507289	GSM3507290
	Group	CTRL	CTRL	CTRL	CTRL	CTRL	CTRL	CTRL	CTRL	CTRL	CTRL	NFH	NFH	NFH	NFH	NFH	NFH	NFH	NFH	NFH	NFH	NFH	NFH	NFH	NFH	NFH	NFH	NFH	NFH	NFH	NFH	NFH	NFH	NFH	NFH	NFH	NFH	NFH	NFH	NFH	NFH
2023-12-01	11738430_a_at	2.18752	2.51765	2.45323	2.91858	2.44828	2.49777	2.45121	2.6526	2.12965	2.22144	2.51093	2.32254	2.00682	2.39473	2.82076	2.6291	2.32645	2.5565	2.45799	2.18519	2.42386	2.28423	2.3246	2.34914	2.6321	2.25203	2.61498	2.30273	2.44866	2.40996	2.48093	2.61249	2.32172	2.24692	2.65595	2.3021	2.26627	2.31518	2.31983	2.45074
2023-03-01	11746972_a_at	5.03892	5.26186	5.22326	5.03664	5.91565	5.10252	4.22074	6.73781	5.85724	7.99664	7.51917	6.42072	7.7652	6.97499	6.35085	6.06813	6.0241	6.58442	6.01535	6.85251	7.57754	6.41658	7.08896	6.85379	7.24325	6.67684	5.97806	6.68022	6.38296	7.05419	6.65635	7.20175	7.70209	6.64305	7.71479	7.63524	8.61116	7.54245	6.88443	6.30255
2023-09-01	11747381_a_at	4.74417	5.41175	5.82561	5.39986	5.12519	5.38421	5.74727	6.40998	6.86814	5.85652	6.5448	7.07939	7.03549	5.78762	5.84016	5.9253	5.77362	6.00086	6.13598	6.25974	5.02903	5.96293	5.57738	5.16678	6.40777	6.23992	5.78389	6.59492	5.95208	5.82429	6.30688	6.1808	4.92343	5.84453	5.85249	5.46584	5.9903	5.58333	6.52864	6.32723
2023-03-10	11730115_a_at	2.11447	2.5481	2.11892	2.22006	2.50479	2.22988	2.4452	2.52017	2.39917	2.07413	2.08088	1.93797	1.92149	2.37579	2.63008	2.1908	2.23382	2.06325	2.23153	2.27285	2.06162	2.29054	2.28398	2.24395	2.17845	2.21665	2.22006	2.37373	2.5352	2.11482	2.10546	2.63653	2.44163	2.06214	2.29299	2.16272	2.06532	2.22092	2.2689	2.32536
2023-09-10	11719852_s_at	1.96528	2.08611	2.2774	1.94226	2.68472	3.00228	2.2305	2.24137	2.00798	2.37597	2.63854	2.3854	2.22812	2.20575	2.30053	2.11165	2.49714	2.16308	2.10342	2.38569	2.08785	2.01821	2.27544	2.20389	2.14533	2.31506	2.29018	2.21631	2.07567	2.01342	2.11936	2.15927	2.34138	1.99723	2.00926	2.46155	2.41756	2.12619	1.94065	2.7258
2023-03-11	11743026_at	2.9749	3.283	3.59932	3.57751	3.68212	2.83662	3.95268	3.25393	2.92593	3.10848	2.85162	2.81952	3.02331	3.02981	3.36018	3.26979	3.52868	3.42962	3.46548	3.19568	2.9149	3.23261	2.93561	2.86074	3.04649	3.0269	3.04449	3.03815	3.0179	2.92608	3.02355	3.1635	3.29154	3.07605	2.92917	3.37422	2.79372	3.05159	2.88617	3.35232
2023-09-11	11757939_s_at	5.73923	5.2642	4.85056	4.89292	5.1527	5.94677	5.05792	4.86094	4.87332	4.79576	4.5946	4.35659	4.64156	4.56857	4.96982	4.78654	4.82486	4.66493	4.82738	5.00477	5.07305	4.93372	4.6697	4.71318	4.8284	4.43146	4.4406	5.15352	4.92503	4.47424	5.13725	4.99415	4.42351	4.719	5.06325	4.74194	4.73071	4.7439	4.61967	4.71235
2023-09-12	11755971_a_at	3.52365	4.61364	4.49309	4.67295	4.86336	4.19135	4.60708	3.89213	4.53132	4.03994	3.95864	3.70572	3.5397	4.21069	4.16491	4.3401	4.52028	4.29484	4.64143	4.29926	3.91003	4.19772	3.96646	3.96664	4.0279	4.3456	4.30743	4.02271	4.14465	4.1372	4.35609	4.12914	4.00536	4.29955	4.10156	4.01326	3.78979	3.9728	3.7481	4.40778
2023-09-14	11734249_at	1.79715	1.86153	1.85078	1.68241	1.79891	1.87865	1.89766	1.75474	2.59306	1.88645	2.06248	1.67931	1.98845	1.90327	1.73771	1.57093	1.75461	1.82172	1.77115	1.92094	1.79102	2.08346	1.64015	1.73648	1.68862	1.77997	1.69045	1.65121	1.71995	1.68862	1.64965	1.828	1.73648	1.64826	1.91253	1.7563	1.63373	1.9424	1.68241	1.76881
2023-03-02	11764052_s_at	2.91197	2.39639	2.49863	2.40194	2.43341	2.05267	2.61718	2.46338	2.81949	2.57057	2.39257	2.36914	2.20797	2.23167	2.55477	2.47099	2.52481	2.48342	2.63904	2.32831	2.49654	2.81923	2.78674	2.45192	2.41717	2.22144	2.32267	2.39392	2.52146	2.34131	2.28741	2.45577	2.7961	2.68639	2.51966	2.4543	2.54179	2.86242	2.2453	2.28947
2023-09-02	11749787_a_at	7.5001	5.90824	5.92566	5.65811	5.33496	6.99126	5.94383	6.44184	6.6173	6.60752	7.02268	6.42374	7.02067	6.30263	6.25096	6.35372	5.90388	6.43163	6.30193	6.52688	6.77069	6.46526	6.56572	6.31486	6.60484	6.46983	5.91189	6.80134	6.12728	6.39137	5.98205	6.49826	6.46752	6.20664	6.80086	6.5003	7.15938	6.68599	6.79107	5.56486
2023-03-03	11725739_at	3.3942	3.71388	3.71785	3.57548	3.87056	3.75412	4.1907	2.81815	3.88331	3.06986	2.6924	3.16572	2.82586	3.22167	3.22368	3.30615	3.76216	3.24924	3.30706	3.10333	3.19026	3.25233	3.03327	2.94861	3.07136	3.19691	3.22069	2.91031	3.08836	3.13944	3.32459	3.1027	3.172	3.46263	3.06351	3.25859	3.00505	2.96775	2.93019	3.62252
2023-09-03	11722077_a_at	2.35809	2.58734	2.78964	2.75632	3.28186	2.70629	2.89568	2.65685	3.0091	2.48568	2.4479	2.90244	2.59085	2.68434	2.94	2.46904	3.07316	2.56561	2.71921	2.54638	2.39107	2.76675	2.47918	2.44349	2.66118	2.74235	2.72697	2.5688	2.41006	2.63387	2.64233	2.75632	2.5113	2.45508	2.51193	2.57574	2.30001	2.61044	2.4697	2.83892
2023-03-04	11726193_at	3.6244	4.49448	3.72687	4.5791	4.32676	3.59688	4.15961	3.73096	3.73091	3.572	3.64866	3.37526	3.32656	3.72839	3.82443	3.92776	4.33458	3.86146	3.73127	3.76674	3.84062	3.80261	3.65322	3.7317	3.70687	3.90768	3.64522	3.72851	3.64553	3.73599	3.83811	3.5161	3.73311	4.09543	3.42756	3.65218	3.35382	3.59359	3.6612	3.96864
2023-09-04	11745226_a_at	2.84582	2.79208	2.74145	3.76414	2.86346	2.60238	2.86556	3.95665	2.39917	3.18112	2.89745	2.9737	2.97033	2.40775	3.14478	2.46909	2.71413	2.8662	3.16424	2.63897	3.04759	2.8599	3.2503	2.63108	3.72231	2.74972	2.86556	2.58853	3.21465	2.63515	2.53747	2.9314	2.80512	3.11618	2.46542	3.09871	3.5636	2.95927	2.49946	3.14222
2023-03-05	11743138_at	4.2876	3.42167	3.22518	3.34496	3.30052	3.54515	3.2223	3.20686	3.84658	3.11484	3.27941	3.18298	3.35554	3.41756	3.09667	3.19904	3.39248	3.5573	3.18916	3.72006	4.2007	3.38087	3.37894	3.69076	3.46334	3.53084	3.38887	3.19712	3.09852	3.71866	3.25324	3.61978	3.67313	3.76845	3.87843	3.25838	3.43644	2.899	3.46051	3.20612
2023-03-06	11762131_a_at	2.73049	3.1257	2.52821	2.80512	2.72443	2.96114	2.72641	2.80825	2.9889	3.01704	3.50438	2.9589	3.8385	3.14432	2.803	3.28418	3.57383	3.3448	3.35318	2.87195	3.58888	3.30149	2.85884	3.02355	2.93352	3.12488	2.98588	3.12404	2.97062	3.01253	2.31308	2.94976	3.49169	3.23639	3.87779	3.03535	2.99664	2.83648	3.47941	2.60646
2023-09-06	11725008_a_at	6.80037	4.1426	4.16186	3.63063	3.94605	5.81393	4.07398	5.26837	4.20327	5.10018	4.95126	5.40602	5.36769	4.59866	4.77098	4.96742	4.3251	5.03571	4.40972	4.84862	4.0108	4.68257	4.51348	4.6185	4.76876	4.63027	4.82735	5.10835	4.98265	4.50597	5.00098	4.83544	4.04288	4.62884	5.07785	4.21039	5.69045	4.84271	5.88118	4.78347
2023-03-07	11745507_a_at	7.48476	5.757	6.57205	5.67058	5.36157	6.44571	5.34581	6.76954	6.0425	7.2658	7.0986	6.42328	7.02035	7.15898	6.88122	6.9054	6.11964	7.16425	6.60171	7.07902	8.06039	6.89512	7.23208	7.19536	7.08022	6.94992	6.85658	7.5429	7.08422	7.15467	6.04174	7.02084	7.87863	6.6071	7.87403	6.97594	7.47229	7.08369	7.26367	6.17774
2023-09-07	11741022_x_at	5.80566	4.79539	4.97478	4.73143	4.71256	5.88516	4.76756	6.08713	5.46359	5.79696	5.89982	6.33619	6.39672	5.59878	5.60946	5.57131	5.06034	5.66239	5.41184	6.05031	6.23303	5.78979	6.27519	5.77998	6.05571	5.90958	5.37035	6.25918	5.69846	5.71776	5.57891	5.94806	6.05478	5.54352	6.3941	5.64816	6.47816	5.94146	6.32485	5.22756
2023-03-08	11737204_x_at	5.11533	8.6961	8.67924	7.74606	8.53327	7.80073	8.82002	6.26026	8.42623	6.66646	6.53322	5.95587	4.91468	6.85092	5.5725	6.07596	7.95321	6.59686	7.43271	5.85703	5.19914	6.75007	5.00586	5.07838	5.02265	6.1981	5.67062	5.22253	5.25194	5.80089	5.46745	5.17536	5.60176	6.26065	5.3594	6.00923	4.6737	5.83845	4.17396	6.34121
2023-09-08	11721047_at	4.00441	3.55998	3.68992	2.76915	3.71019	3.98389	4.17927	3.96716	4.16093	3.87837	3.64137	4.16432	4.24409	3.49543	3.78759	3.90274	3.68379	3.82065	3.87864	3.92514	3.43693	3.95286	3.88373	3.73388	4.25007	3.73765	3.96246	4.04602	3.827	3.87976	4.24535	3.70994	3.87725	4.20983	3.87837	3.86608	4.00313	4.23622	3.72114	4.07165
2023-03-09	11758847_at	3.07872	4.04862	3.73277	3.43181	3.2503	3.2673	3.92312	3.43879	3.9881	3.21719	3.13573	3.41305	3.12835	3.70433	3.47228	3.87422	4.01381	3.27318	3.74692	3.32986	3.31458	3.70134	3.31653	3.42517	3.45666	3.73342	3.38194	3.42818	3.39343	3.49181	3.65793	3.69821	3.46821	3.27304	3.12902	3.33865	3.13245	3.29614	3.60416	3.46363
2023-09-09	11745883_s_at	3.73749	4.79135	4.91492	4.76004	5.07476	4.36238	4.95729	4.58868	4.38371	4.82662	5.06651	4.51669	4.55933	4.73949	4.91456	4.56491	4.88954	4.94834	4.90158	4.591	4.18931	4.713	4.78362	4.58098	4.67912	4.76489	4.55536	4.61435	4.71867	4.79444	4.87402	4.72995	4.5613	4.46252	4.32221	4.81653	4.06166	4.38723	4.70561	5.04119
A1BG	11741180_a_at	4.60254	4.7882	4.5354	4.80901	4.4526	4.55152	4.87901	3.59738	4.70617	4.40019	3.89939	4.48626	4.53108	4.21563	4.28342	4.41305	4.46562	4.1016	4.73254	4.32125	3.9133	3.80947	4.63971	4.00957	4.35053	4.64306	4.34991	4.36299	4.31352	4.42629	4.34177	4.37826	4.13449	4.25283	4.1805	4.33096	3.96209	4.34419	4.25705	4.39061
A1CF	11745515_a_at	2.28163	3.38736	3.25098	2.74627	3.33318	2.75944	3.26642	2.62464	3.15895	2.40305	2.40207	2.39286	2.11033	2.6813	2.42624	2.67953	3.03509	2.70248	2.82545	2.56209	2.13089	2.75229	2.18757	2.40461	2.41532	2.59897	2.63083	2.02447	2.36585	2.53958	2.82545	2.54964	2.56325	3.04986	2.50951	2.70125	2.11443	2.31562	2.1806	2.75819
A2M	11715363_a_at	3.52806	4.61991	4.05598	4.36512	4.28334	3.97619	4.57381	3.69902	4.30547	3.90686	4.18093	3.8127	3.81573	4.17863	4.24219	4.2885	4.30239	4.08052	4.26532	4.14608	3.80367	4.14457	3.83671	4.16955	4.2072	4.1614	4.20879	4.16514	4.04941	4.18088	4.39653	3.92159	4.08974	4.09748	3.77705	4.05318	3.60299	4.27943	3.89764	4.60003
A2ML1	11749650_x_at	2.31373	3.00792	2.60185	2.78917	2.7498	2.70107	2.94262	2.56913	2.42857	2.57639	2.32179	2.57145	2.47408	2.55402	2.66618	2.79159	2.7266	2.55951	2.65222	2.20495	2.20738	2.64427	2.699	2.71402	2.41233	2.6633	2.52957	2.43093	2.46441	2.54053	2.94171	2.60792	2.40342	2.40927	2.51128	2.57639	2.57314	2.47849	2.48152	2.8748
A3GALT2	11742524_at	3.80883	4.72794	4.4946	5.1029	4.77595	4.24831	4.59941	4.12706	4.39289	3.94254	3.96965	4.38039	3.54073	4.22914	4.04074	4.12431	4.72082	4.15853	4.44535	3.88027	3.54131	4.22373	4.04683	3.89086	4.14625	4.29303	4.30929	3.8818	3.98424	4.15952	4.24735	4.13368	4.17774	4.06327	3.95524	4.00718	3.65879	4.0997	3.88566	4.14625
A4GALT	11763671_at	2.69542	2.84142	2.78227	3.36003	3.20753	3.14028	3.07393	3.07693	2.84142	2.63637	2.31699	2.66798	2.91902	2.7948	2.76477	2.81717	3.08257	2.97607	2.98768	2.5864	2.74855	2.93796	2.63589	2.63033	2.56808	2.71646	2.65651	3.08476	2.91159	3.08949	3.1669	2.81989	2.83512	2.99033	2.69378	2.75195	2.75195	2.54222	2.63033	2.62331
A4GNT	11735810_at	3.98611	4.52523	4.56252	4.41834	4.10891	4.14603	4.28645	3.7742	4.58386	3.27636	4.12984	4.01034	3.87255	4.22278	4.08319	4.23037	4.2433	4.1445	3.95624	3.94679	3.68168	3.97326	3.89812	4.02131	3.99788	4.26279	3.97522	4.37	3.87893	3.95887	4.04909	3.90608	4.04909	4.25439	4.0658	3.97146	3.62539	3.77751	3.98874	4.25777
AAAS	11716958_a_at	5.81609	6.33273	6.10672	6.33936	6.13599	6.16026	6.53019	5.64887	6.17874	5.72406	6.14307	6.13518	5.61034	5.7451	6.08321	6.00234	6.13124	5.83214	6.0473	5.92315	5.83845	6.10151	5.89079	5.62707	5.87789	5.91406	5.90882	5.89167	5.66623	6.04111	6.00739	5.91919	5.80259	6.25235	5.65384	5.95202	5.23847	6.07339	5.77212	5.9024
AACS	11746682_a_at	3.25335	3.59243	3.84037	4.11863	4.38736	3.55864	4.10974	3.5083	3.77366	3.7951	3.66581	3.19781	3.34749	3.48603	3.68167	3.35208	3.69402	3.5478	3.89495	3.40841	3.30411	3.36681	3.30587	3.53651	3.46488	3.48405	3.36138	3.37687	3.45823	3.56603	3.45198	3.40868	3.39994	3.63008	3.20239	3.6126	3.31391	3.49895	3.19459	3.63002
AADAC	11744163_at	2.20872	2.49136	2.3164	2.42888	2.2474	2.14321	2.25651	2.61277	2.51607	2.29242	2.51572	2.27649	1.95531	2.52618	2.37167	2.24522	2.09877	2.24267	2.23153	2.26812	2.33918	2.48785	2.35259	2.21262	2.20631	2.01982	2.06894	2.23612	2.31895	2.13504	2.45345	2.27739	2.15824	2.39673	2.20808	2.19072	2.3987	2.18529	2.21546	2.25799
AADACL2	11731948_a_at	2.06289	2.21291	2.39508	2.04676	2.22841	2.09718	2.80426	2.09932	2.36577	2.38862	2.21672	2.42252	2.44491	2.04636	2.35066	2.21091	2.19902	2.34309	2.39489	2.28043	2.1412	2.04995	2.21747	2.42214	2.20277	2.09221	2.40158	2.37454	2.05724	2.27509	2.17433	2.23714	2.25623	2.08005	2.24747	2.48169	2.21747	1.98567	2.12516	2.21823
AADACL3	11741944_a_at	3.5859	3.6064	3.89011	3.64192	4.0575	3.62125	3.6062	3.53557	3.86752	3.53485	3.88948	3.53485	3.29833	3.82421	3.47679	3.44352	3.71283	3.5585	3.73492	3.72612	3.80474	3.66359	3.68847	3.47142	3.45074	3.59307	3.5304	3.5003	3.6309	3.51595	3.70729	3.51258	3.59903	3.79672	3.65056	3.50406	3.53697	3.68967	3.50118	3.72914
AADACL4	11737738_at	2.2723	2.90844	2.64935	2.67731	2.63816	2.43666	2.72832	2.57674	2.86039	2.72626	2.81066	2.76813	2.40853	2.24751	2.5868	2.73341	2.73715	2.48296	2.46442	2.50657	2.41811	2.42413	2.52225	2.61079	2.5667	2.49403	2.92802	2.54661	2.72769	2.61964	2.48419	2.36539	2.50979	2.43623	2.55189	2.39342	2.54329	2.61856	2.4699	2.37055
AADAT	11724057_a_at	1.78629	1.71984	1.87998	2.12168	1.89281	4.3153	1.92565	1.69025	1.83815	1.86591	1.83769	1.88818	1.75815	1.86909	2.01452	1.75774	1.9714	1.8194	1.88222	1.9699	1.85152	1.81237	1.74238	1.78127	1.78034	1.83582	2.06917	1.82332	1.91146	1.91288	1.68782	1.99281	1.9852	1.95411	1.73332	1.83663	1.70798	1.84583	1.9407	1.86722
AAGAB	11719079_at	4.32911	4.26607	4.18624	4.2578	4.3164	4.14474	4.71587	4.5033	4.40972	4.14558	3.84761	4.07743	4.5885	3.9479	4.2755	3.83045	4.21305	4.11738	4.18766	4.02559	3.93031	4.3412	4.23388	4.33555	4.35785	4.11201	4.17726	4.1835	4.02957	4.13243	4.41501	4.22941	4.01985	4.28527	4.28527	3.94725	4.55929	3.94683	4.14297	4.52373
AAK1	11745136_a_at	2.1768	2.25752	2.02745	2.60624	2.25719	2.31389	2.41683	2.17428	2.64767	2.33618	2.46733	2.55933	2.35213	2.09245	2.33767	2.35906	2.39986	2.24184	2.25764	2.37085	2.51607	2.23054	2.32419	2.4291	2.33382	2.12295	2.3759	2.41945	2.19593	2.26311	2.5294	2.12707	2.10594	2.02037	2.10088	1.95876	2.29714	1.958	2.3672	2.22675
AAMDC	11763032_x_at	3.23995	2.75158	2.86225	3.50722	2.69726	3.04636	2.90002	2.83339	2.92588	3.00924	2.5603	3.22116	3.14269	3.05653	2.7598	2.80859	3.15738	3.02772	3.03001	2.78799	2.85158	2.93704	3.53606	2.8876	2.87968	2.92975	2.88801	2.94108	2.86376	2.94154	3.06095	2.93615	3.01582	2.80736	2.89967	2.89096	2.84107	3.47761	2.87205	3.14269
AAMP	11733734_a_at	7.1659	6.69938	6.53962	6.84084	6.96213	6.92017	6.66397	6.94324	6.77874	7.09635	6.92976	6.86282	7.27835	6.91594	6.98795	6.82363	6.94942	6.89429	6.66247	6.91302	6.83851	7.0468	7.1646	7.02558	7.25976	6.85726	6.85194	6.94404	6.99373	6.98377	7.2191	6.94336	6.81837	7.04435	6.57959	7.13084	7.17399	7.01855	7.03938	7.07238
AANAT	11744813_a_at	2.87796	4.37533	3.99206	3.72729	3.82687	3.61081	4.51511	3.6104	3.89182	3.4126	3.71106	3.66742	3.17876	3.80139	3.57292	3.48312	4.1186	3.47129	4.05987	3.18624	3.20171	3.53757	3.42288	3.28411	3.21853	3.71996	3.34799	3.34367	3.52509	3.5613	3.77858	3.53248	3.43197	3.67728	2.93186	3.26585	2.88482	3.31164	2.98798	3.92533
AAR2	11763713_x_at	1.82956	1.96182	2.04305	1.66347	2.23338	1.8773	1.80388	1.84076	2.2665	1.73991	2.07818	1.83122	1.83487	1.82628	1.90107	1.94837	1.85706	1.7126	2.02581	1.93459	2.07499	1.92027	1.76055	1.86272	2.02186	2.03026	1.94572	1.78969	1.80288	1.91493	2.04942	1.95895	1.92318	1.92639	2.05811	1.99575	1.80217	1.97782	2.04675	1.83226
AARD	11734445_at	2.50639	2.8512	2.91537	3.20106	3.25881	2.389	3.53897	2.44926	2.89967	2.39083	2.90105	2.69108	2.52846	2.71502	2.85713	2.58348	3.04637	2.74741	2.84431	2.51035	2.59909	2.51735	2.79774	2.4679	2.19479	2.5657	2.82543	2.65472	2.46651	2.67828	2.63975	2.82294	2.47204	3.02519	2.63883	3.01045	2.43369	2.56503	2.53374	2.58803
AARS	11746316_a_at	5.9692	5.60984	5.91606	5.88591	5.9359	7.80907	6.01569	5.73685	5.53389	5.60946	6.47687	6.0735	6.00527	5.65552	5.86102	6.1887	5.66706	5.52198	5.64266	6.02343	5.81751	6.09467	5.89764	5.67645	5.89304	5.82829	5.75708	5.75348	5.87448	5.70125	6.21826	6.02263	5.40275	5.7158	5.86716	5.7409	6.4198	5.8875	6.42336	5.78248
AARS2	11728815_a_at	4.41531	4.32421	4.34303	4.18744	4.73606	5.46096	4.59941	5.25099	3.93183	4.45038	4.38736	5.09384	4.78278	4.72752	4.98588	5.02403	4.90726	5.05603	4.86663	4.91386	3.97449	5.07741	4.45909	4.8956	4.77199	4.63279	4.6299	5.03287	4.52126	4.90029	5.20274	4.83543	4.3023	4.77869	4.58849	4.65836	4.84973	4.97175	5.51724	4.66466
AASDH	11745001_a_at	4.78073	3.99123	3.92051	3.85836	4.33975	4.72993	4.0402	4.12322	4.70256	4.82913	4.32808	4.43974	4.60449	4.36453	4.47515	4.49688	4.08138	4.27202	3.93825	4.21442	4.73003	4.37458	3.77458	4.41319	4.13341	4.441	4.41319	4.77034	4.1959	4.41073	4.37492	4.66217	4.45794	4.52253	4.45245	4.32928	4.66278	4.91859	4.69085	4.25965
AASDHPPT	11728969_a_at	7.17626	5.0859	5.74459	5.27253	5.67451	6.64045	5.41693	6.50643	5.87439	6.73259	6.50699	6.18367	6.89959	6.38739	6.13439	6.31252	5.71763	6.44004	5.91141	6.46657	6.59764	6.37604	6.39219	6.21472	6.77739	6.46953	6.13933	6.71992	6.44043	6.47484	6.05771	6.63172	6.58318	6.27782	6.74952	6.55746	7.09902	6.96753	6.88624	6.20284
AASS	11750960_a_at	2.2018	2.11286	1.87085	2.02338	2.01291	2.43749	2.33777	1.97553	1.99029	1.91309	1.77397	1.70843	2.00946	2.01639	1.9143	1.81207	1.88695	1.97553	1.75221	1.92009	1.77978	1.81013	1.68978	1.89342	1.90827	1.67496	1.98601	1.81208	1.94574	1.85945	1.85368	1.83074	1.77287	2.02775	1.64634	1.76134	1.88911	1.72095	1.77788	2.16926
AATF	11732137_at	7.12303	6.82641	6.69957	6.93038	6.74686	7.2405	6.56814	7.48516	6.77897	6.89324	7.52875	7.50957	7.2699	6.93691	7.34613	7.29688	6.93463	7.1959	7.03108	7.16633	7.42085	7.09474	7.19608	7.29275	7.27895	7.09789	7.39368	7.18337	7.36165	7.17752	7.53795	7.13896	6.87371	7.16353	6.96111	7.12258	7.28811	7.2213	7.21257	6.96197
AATK	11734091_a_at	7.60913	8.12681	8.42222	8.29576	7.43091	5.57365	7.73416	8.8247	7.69709	7.94221	8.38573	8.21563	7.82229	8.37265	8.97772	8.67159	8.30722	8.72341	8.72075	8.60237	7.95362	8.23389	8.54655	9.29707	8.31057	8.54503	9.31123	8.04087	8.66416	8.57615	8.2225	7.9162	9.53773	7.97529	9.05355	8.51782	8.01126	8.95393	8.55716	8.26987
ABAT	11739130_a_at	3.83296	4.37182	4.49324	4.68196	5.08864	4.19242	4.98346	3.94676	4.49647	4.10704	4.08194	4.02923	3.99465	4.46829	4.53918	4.7512	4.3711	4.43398	4.50598	4.1412	4.30349	4.2031	4.28788	4.89906	4.3239	4.22835	4.47134	4.10471	4.5732	4.44551	4.15404	4.25824	4.49568	4.2221	4.06881	4.12803	4.02635	4.8778	3.9065	4.30129
ABCA1	11760079_at	1.67801	2.3161	2.27999	2.76975	2.55117	2.06949	2.26316	2.09493	2.46302	2.12022	2.04718	2.44249	2.24449	2.60807	2.33173	2.29931	2.39504	2.17872	2.16898	2.25661	2.139	1.9193	2.23068	2.05749	2.3446	2.24936	2.23937	2.11735	2.15545	1.95551	2.19536	2.1628	2.57044	2.24692	1.92747	2.52194	2.28071	2.17063	2.37746	2.32888
ABCA10	11740633_x_at	1.9299	2.03355	1.88183	1.7352	1.75614	2.1986	1.86294	1.86057	1.87326	1.86088	1.93304	2.27406	2.25862	1.8546	1.90025	1.78311	1.68158	1.79048	1.78523	2.20101	1.96288	1.93399	1.97501	1.78311	1.68983	1.98913	1.9545	1.96499	1.81753	1.76021	1.72197	1.99996	1.66086	1.92813	1.75235	1.84628	1.91603	2.09666	2.09992	1.89911
ABCA12	11732684_a_at	3.31413	4.00056	3.52784	3.77707	3.81603	3.27303	4.46775	3.00772	2.84023	3.38389	3.05504	3.67808	3.0653	3.37798	3.41469	3.50396	3.78368	3.58988	3.45508	3.60149	3.25671	3.37162	3.6408	3.2244	3.14716	3.42095	3.62885	3.25373	3.38801	3.3229	3.51787	3.36574	3.37523	3.4081	3.24643	3.34321	3.01796	3.3151	3.54738	3.43399
ABCA13	11754735_s_at	4.97009	2.29607	2.46155	2.64302	2.26345	2.21053	2.20085	2.66025	2.85865	3.43317	2.80776	2.63462	2.32654	2.52632	2.16744	2.15911	2.10525	2.12578	2.23343	2.66669	2.33867	2.16702	2.26715	2.08879	1.86517	2.11801	2.42276	2.22857	2.34951	2.34157	2.0562	2.23637	2.61516	2.01539	4.1927	3.06366	2.30007	2.93391	2.10515	2.11771
ABCA2	11753416_a_at	3.54073	4.02523	3.53855	3.37832	4.16653	3.68953	3.97939	3.20063	4.25643	3.80417	3.32984	3.97916	3.10709	3.25945	3.43029	3.5158	3.82608	3.33614	3.67467	3.23169	3.60102	3.07719	3.41913	3.63368	3.54945	3.32202	3.73588	3.41859	3.38095	3.7675	3.67989	3.33955	3.66013	3.35262	3.33614	3.20333	3.67144	3.32972	3.48099	3.44721
ABCA3	11723350_a_at	2.6701	3.41852	3.31647	3.78417	3.59298	3.30989	3.85194	2.93614	2.93812	2.65755	2.92243	3.21919	2.53724	3.1734	3.5653	3.15337	3.29082	3.29692	3.31461	3.37354	2.96411	3.06353	3.10474	3.11491	2.86235	3.17573	3.52499	3.12478	3.48913	2.88616	3.1408	2.88736	2.92911	2.82727	2.81609	2.91839	2.93311	2.74562	3.05274	3.10485
ABCA4	11752075_a_at	2.83164	3.71388	3.96086	4.10256	3.46298	3.46101	4.43378	2.78344	3.25461	3.13526	3.12351	2.84309	2.58377	3.38141	3.28972	3.48643	4.23095	3.69503	3.83078	3.30861	3.00204	3.30992	3.0815	3.2597	2.97861	3.10214	3.30048	2.96186	3.38038	3.28928	3.58553	3.34646	3.13595	3.94233	2.58621	3.19673	2.89761	3.59991	3.11835	3.71361
ABCA5	11736237_a_at	2.11858	2.06906	1.95233	1.84958	1.89766	2.13285	2.07841	2.22	2.05926	2.05881	2.05627	2.40627	2.36824	2.16306	1.96747	1.94127	2.15521	2.22	2.13552	1.99556	2.20007	2.06049	2.08603	2.25101	2.12778	2.21549	1.8543	2.35237	1.98248	2.0445	2.1515	2.01838	1.99236	2.14283	2.12024	2.00918	2.02373	2.07377	2.39748	2.11097
ABCA6	11759820_s_at	2.06604	2.76233	2.62326	2.48635	3.08125	2.2632	2.73247	2.19778	2.34985	2.5704	2.43917	2.33435	2.07458	2.48621	2.28547	2.35917	2.89452	2.53724	2.42151	2.26036	2.32643	2.47488	2.54179	2.41522	2.15205	2.38015	2.37971	2.00249	2.38456	2.38392	2.58329	2.25691	2.50472	2.38598	2.42748	2.51286	2.32469	2.27592	2.50008	2.39802
ABCA7	11749351_a_at	4.875	6.03314	6.05908	6.04023	5.93402	5.08715	6.14399	5.24779	5.80102	5.55877	4.96906	5.18481	5.10555	5.59021	5.6516	5.26431	6.01043	5.36393	5.73731	5.38524	4.92581	5.63285	5.31982	5.3266	5.43297	5.39755	5.41427	5.18826	5.29781	5.67345	5.65755	5.33136	5.42713	5.63709	4.91672	5.46651	4.77394	5.26141	5.27079	5.58396
ABCA8	11721557_a_at	2.04137	1.98639	2.35953	2.11183	2.43015	2.04535	2.52359	1.97553	2.55384	2.29955	2.41864	2.51751	1.99923	2.30154	2.11705	2.11507	1.93009	2.18192	2.1212	2.00454	2.15074	1.916	1.96761	2.17763	2.0329	2.24748	2.45046	2.31934	2.32398	2.17982	2.00439	2.01468	1.82628	2.14417	1.9265	1.94507	1.85529	2.25316	1.97412	2.08885
ABCA9	11761836_x_at	1.8859	2.29299	1.91074	2.0063	1.9516	2.03246	2.22349	2.56967	2.79318	2.13285	2.03353	2.05156	1.96707	2.26092	2.00158	1.98338	2.20457	2.14277	2.01558	1.90021	2.11449	1.95642	1.89863	2.06067	1.89115	2.01309	2.11922	2.1116	1.99647	2.2013	1.816	1.99181	1.91178	2.24452	1.77831	2.02247	2.06728	2.06525	1.91468	2.09612
ABCB1	11759048_at	4.40587	4.97685	4.00535	4.08291	5.1986	4.12038	4.47418	5.17584	5.46026	4.98949	4.5096	4.80482	5.15651	5.05944	4.80606	4.76523	4.76533	5.05428	4.88943	4.80434	5.27457	5.48384	4.66722	4.7803	5.01712	5.39905	5.24836	4.78841	4.60142	4.68843	4.89198	4.62592	4.06198	4.89274	4.38539	4.18653	4.36417	4.29919	5.413	4.14634
ABCB10	11724634_s_at	7.65427	6.95494	7.5268	6.75083	7.73786	7.66563	8.51298	6.758	7.66008	7.77776	6.75532	6.75269	7.30758	6.66128	6.01246	6.08576	6.7441	6.7436	6.21387	6.75869	7.10948	6.40256	6.48679	6.59429	6.89174	6.37123	5.9132	6.75308	6.48582	6.49689	6.01837	7.01576	6.68036	6.49455	6.7752	7.07261	7.13934	7.00869	7.07448	6.20984
ABCB11	11752143_a_at	2.00926	2.05996	2.37061	2.44209	2.26059	2.05224	2.35723	2.35647	2.37061	2.06407	2.31264	2.13894	2.21399	2.40855	2.18143	2.03025	2.15028	2.30991	2.2423	2.16341	2.06524	2.0996	2.44884	2.28314	2.2936	2.15002	2.51171	2.00101	2.25394	2.11482	2.56163	2.25115	2.39548	2.06811	2.3199	2.06266	2.10318	2.15939	2.14922	2.27949
ABCB4	11732819_a_at	2.69714	2.67179	2.59029	2.55117	3.84507	4.24315	3.04748	2.15104	2.93927	2.89258	3.01505	3.84006	3.2682	2.96559	3.04546	3.18687	2.92303	2.87469	2.82545	2.80082	3.3146	2.5628	2.70764	2.801	2.64668	4.36373	2.86556	3.12642	3.11902	3.93324	2.74459	2.63057	3.09482	3.09894	3.14209	2.74221	3.01565	2.4984	3.48007	3.55215
ABCB5	11750642_a_at	2.20315	2.28469	2.01557	2.58638	2.60911	2.08032	2.85503	2.25123	2.19553	2.15605	1.93888	2.30348	2.17644	2.39917	2.28924	2.23396	2.2848	2.08468	2.34441	1.98174	2.25345	2.20343	2.49326	2.14821	2.26113	2.13261	2.47982	2.11359	2.06501	2.2311	2.03696	2.30348	2.07872	2.05999	2.20887	2.01491	2.22173	2.12228	1.93544	2.56265
ABCB7	11737897_a_at	7.30222	5.19622	5.06692	5.03982	4.94199	6.57657	4.8811	5.84279	5.27332	6.54765	5.96394	6.13259	6.69322	5.88428	5.64308	5.59947	5.32955	5.57033	5.15413	6.02752	6.11103	5.95724	6.11097	5.9776	5.99743	5.75497	5.46169	5.91443	5.64351	6.18392	5.91441	6.16185	5.72275	6.04015	6.21196	5.86617	6.44173	6.43318	6.28878	5.26832
ABCB8	11754613_x_at	3.40045	4.3505	4.12196	3.8438	4.47746	3.63319	4.58352	3.84788	3.71388	3.51776	3.68934	3.75393	3.35829	3.77656	4.16873	4.13914	4.11519	3.96791	4.05212	3.79114	2.75616	3.86003	4.07804	3.76023	3.72632	3.78669	4.10277	3.58338	4.16121	3.96723	3.66748	3.67808	3.85897	3.61028	3.50416	3.80362	3.65438	3.84788	3.65069	3.94444
ABCB9	11747340_x_at	2.87665	3.27967	3.46569	3.4117	3.65662	3.09924	3.63699	2.61623	3.30287	2.96657	3.10132	2.73913	2.25681	2.82272	3.02899	2.98118	3.51505	3.0502	3.24439	2.94402	2.43007	3.07586	3.21107	2.96261	2.86742	3.33818	3.0848	2.77953	2.76587	3.1269	3.13347	2.9261	2.98809	2.95783	2.96974	3.03291	2.86965	2.92922	2.84582	2.94691
ABCC1	11719420_a_at	4.02984	4.21176	3.97177	4.36123	4.64403	3.9196	4.25192	3.30869	4.21176	3.50237	3.77729	3.99072	3.7317	4.20384	3.99473	3.8704	4.12588	3.93329	4.0075	3.65267	3.50237	3.91681	3.72688	3.67301	3.63522	3.97648	3.56311	3.94692	3.59901	3.64577	3.98338	3.93769	3.66059	3.89744	3.83891	3.75713	3.53155	3.92508	3.55846	3.70729
ABCC10	11724636_a_at	4.97904	5.50299	5.27043	5.39351	5.03003	4.80012	4.60757	5.75031	5.4918	5.62135	5.82303	6.39951	5.9408	5.37869	5.62501	5.75677	5.57073	5.57385	5.53834	5.95652	5.8079	5.80996	5.19625	5.92957	5.92541	5.33521	5.84793	6.09054	5.60605	5.59913	5.64739	5.79946	5.41402	5.5748	5.5864	5.44045	5.69286	5.77021	6.22824	5.32812
ABCC11	11731305_a_at	3.12308	3.76309	3.78169	3.61168	3.42155	3.29893	3.88664	3.24289	3.52617	3.42086	3.74165	3.47509	3.41318	3.57172	3.29002	3.49433	3.63793	3.09268	3.49889	3.50208	3.92471	3.11152	3.59519	3.64004	3.4184	3.57013	3.88664	3.46848	3.45942	3.3229	3.24633	3.54475	3.41511	3.51428	3.49316	3.07028	3.44608	3.28807	3.3968	3.56192
ABCC12	11737712_at	3.01038	3.71388	3.71388	3.95332	3.39691	3.47611	4.20331	3.54526	3.80493	3.12076	3.4202	3.56112	3.08963	3.4752	3.4013	3.45334	4.12315	3.46098	3.62708	3.44101	3.21903	3.44656	3.34374	3.31296	3.3193	3.17984	3.43756	3.30572	3.43005	3.24302	3.43754	3.3584	3.18395	3.33636	3.27872	3.36906	3.24611	3.42894	3.36364	3.84837
ABCC2	11759031_at	3.88274	4.10929	3.93539	4.40384	3.83691	3.99241	3.43644	3.5698	3.72417	3.91173	3.65749	3.89017	3.61954	4.1907	3.78434	4.49055	4.24456	4.02503	3.94197	4.22734	4.38284	4.38112	3.75315	4.11891	3.80329	4.02131	4.29753	4.27542	4.01959	4.21277	3.85094	4.22925	5.38644	4.45326	4.89319	4.54177	4.25432	3.98096	4.37183	3.66468
ABCC3	11748362_s_at	3.2411	4.06524	3.05487	5.39953	4.33668	3.75143	4.24989	4.67556	4.27412	4.44782	5.01732	4.37092	5.44665	4.36608	4.88062	5.50672	4.78373	5.28533	4.95827	4.25363	5.90583	5.73157	5.16856	5.13288	5.32618	5.31401	5.07148	5.03908	5.4388	5.18565	5.81806	4.70483	5.49556	5.05306	4.17725	4.59264	4.46368	4.76976	3.71801	4.17895
ABCC4	11719632_a_at	3.92118	4.79236	3.75672	4.08933	4.16795	4.15031	5.25575	2.5934	3.38843	4.25172	3.8225	3.7526	3.29439	3.6544	3.00364	3.69	3.54386	4.08145	3.99726	3.32944	3.49635	3.46566	3.21137	2.70423	3.57326	3.20206	2.60765	3.32785	3.17159	3.06933	3.1265	3.15302	3.14773	3.28848	3.26382	3.5282	3.17159	3.30983	3.12553	3.22998
ABCC5	11744397_a_at	3.67664	4.46246	4.6237	4.08291	4.4717	4.00186	4.17528	4.21589	4.54123	4.05819	3.77602	3.7401	3.86325	4.07049	4.10162	4.18712	4.43097	4.17891	4.26773	3.81569	3.74047	4.02396	3.84786	3.96861	3.80608	4.37248	4.31551	4.1088	4.226	4.06454	4.0155	3.74353	3.93741	3.98721	4.32221	3.79941	3.71811	3.78845	4.0807	3.82641
ABCC8	11757771_a_at	3.11724	3.8467	3.62723	4.21	4.0193	3.08546	3.80867	3.35232	4.31849	3.72225	3.092	3.02967	3.15402	3.31969	3.39828	3.32015	4.3578	3.24869	3.78612	3.3987	2.91174	3.26346	3.19161	3.41473	3.45658	3.92917	3.65164	3.54699	3.41445	3.7981	3.3212	3.38147	3.19652	3.29456	3.10644	3.30887	3.15281	3.51837	3.19253	3.73348
ABCC9	11758382_s_at	2.09263	2.24563	2.03315	2.48067	2.23896	2.32053	2.67348	2.05815	2.39917	2.08039	2.66116	1.92167	2.1964	2.12461	2.45986	2.412	2.34494	2.24868	2.50411	2.2585	2.28361	2.07136	1.93216	2.25782	1.97796	2.32486	2.29412	2.16881	2.42511	2.31727	2.25315	2.08148	2.19244	2.06365	1.89074	2.12461	2.26657	2.25304	2.18549	2.05642
ABCD1	11727955_at	4.80528	5.52453	4.93002	5.26508	5.5053	4.79709	5.83776	5.38741	4.71436	4.72776	4.91434	4.71766	4.83417	4.98571	5.37739	5.1442	5.31714	5.48408	5.13928	4.99923	5.47509	5.10848	5.46014	5.04437	5.11386	5.14866	5.25084	4.69922	5.15657	4.97429	5.41661	5.06815	5.2683	5.54559	4.76392	5.32971	5.11294	5.09045	4.57749	5.37275
ABCD2	11737009_at	2.2575	2.06289	2.39958	2.52141	2.67346	2.5266	2.43971	2.71363	2.51028	2.73747	2.73891	2.99155	2.80892	2.95927	2.82044	2.72562	2.87617	2.70714	2.62141	3.02338	2.67403	2.91218	2.73652	2.79111	3.25445	2.79083	2.55812	2.74684	2.68383	2.738	2.56688	3.14724	2.38254	2.89471	3.01837	2.53958	2.8478	2.7562	3.1635	2.99427
ABCD3	11741591_at	2.0308	2.21869	2.26991	2.12619	2.08055	2.15267	2.30077	2.2589	2.33971	2.0481	1.92074	1.92617	2.02778	1.97657	2.04472	1.79972	2.23176	2.05281	2.07506	2.09181	1.9446	2.0996	1.91036	1.897	1.84768	2.12515	2.19682	2.03983	2.04204	2.01666	1.90105	1.87902	1.92825	2.17749	2.39323	2.24685	1.86887	2.0338	1.79383	2.1506
ABCD4	11752625_a_at	6.44674	5.25702	5.09869	5.32153	5.14948	5.99424	5.28524	5.25823	5.32294	5.07899	5.09378	5.15582	5.4294	4.93159	5.50297	5.28118	5.39496	5.2355	5.54462	5.42485	5.4951	5.30144	5.19855	5.36912	5.4976	5.48005	5.25458	5.45145	5.27187	5.34715	5.35524	5.28987	5.24809	5.28903	5.07785	5.34606	5.71087	5.23448	5.53584	4.80006
ABCE1	11747858_a_at	5.79645	2.56242	2.91925	3.34346	2.53039	4.73189	2.58592	3.93009	3.33149	4.54222	4.16956	3.73848	4.64013	4.04617	3.50352	3.51352	3.0926	3.83775	2.97774	4.18642	3.97415	3.76735	3.82256	3.54507	3.95714	3.45298	3.12886	4.10758	3.44643	3.95106	3.14958	4.40566	3.75082	3.69528	4.06585	3.63409	4.50581	4.35337	4.66256	3.5133
ABCF1	11720959_a_at	6.65717	6.62094	6.45976	6.59541	6.69461	7.07409	6.66734	6.85432	6.69324	6.53566	6.8112	7.20105	7.12031	6.44078	6.95849	6.98094	6.16136	6.64162	6.57785	6.83972	6.90241	6.65272	6.9755	6.5456	6.68532	6.51457	6.32349	6.63692	6.71363	6.61169	7.58374	6.81488	6.06729	6.8522	6.60394	6.40295	6.91052	6.59357	6.94441	6.28255
ABCF2	11722025_x_at	4.63794	4.82035	4.60432	4.77964	5.29551	5.18723	4.99554	5.00616	4.91305	4.68425	4.88636	5.3035	4.77278	4.77718	5.08349	4.974	4.73446	4.67446	4.68466	4.89232	5.00986	4.77718	4.85043	4.81614	4.9022	4.97618	4.87743	4.93506	4.73999	4.77848	5.27978	4.98583	4.4181	4.81907	4.64665	4.7159	4.86917	5.19922	4.95937	5.00907
ABCF3	11746959_a_at	4.99256	4.03638	4.17014	4.35219	4.11223	4.91999	4.27939	5.30735	5.04208	4.82276	5.77591	4.91033	5.64429	4.83007	4.6182	4.89066	4.85496	4.94376	4.73679	4.70857	3.40851	4.92603	4.64436	4.8129	5.16514	5.14701	4.94614	5.18444	4.78937	5.08139	5.15019	5.00989	4.79305	4.32864	4.77446	4.92659	5.16238	4.79359	5.27765	4.77848
ABCG1	11725516_s_at	5.91636	4.72119	4.86128	5.41138	4.28599	3.41148	4.4934	7.28179	4.39025	5.22253	6.52053	6.3812	6.0899	5.61929	6.94428	7.10542	4.92731	6.11672	5.17912	6.16429	7.58491	5.61114	6.6069	7.06111	5.98505	5.89985	6.75857	6.18396	6.8105	6.72656	5.46703	6.15368	7.74001	6.23211	7.83919	6.84014	7.15426	5.9125	6.51532	6.25052
ABCG2	11724537_a_at	3.1315	4.30096	3.69607	4.12554	4.13478	3.52539	4.57397	3.3596	3.82488	3.4922	3.4006	3.05622	3.15395	3.91192	3.4843	3.81217	4.08924	3.63033	3.74741	3.51268	3.08888	3.52531	3.57153	3.45034	3.41677	3.60803	3.57418	3.66351	3.58115	3.55855	3.82735	3.31823	3.5317	3.50483	3.31822	3.42293	3.19081	3.71303	3.18705	4.00579
ABCG4	11741653_a_at	2.95898	4.00191	3.66405	4.02556	3.85435	3.46425	4.36753	3.22485	4.21255	3.05972	3.64217	3.12546	3.23389	3.41566	3.38981	3.49256	4.19019	3.90357	3.39757	3.58801	3.32796	3.7537	3.35395	3.1457	3.55985	3.81593	3.3789	3.53195	3.24977	3.41104	3.60175	3.26071	3.56521	3.46415	3.30349	3.09232	3.27567	3.44261	3.29548	3.95046
ABCG5	11756916_a_at	2.35099	2.5291	2.16812	2.3623	2.32101	2.10288	2.65421	2.26248	1.9988	2.39144	1.9052	2.12267	2.60905	2.15788	2.13583	2.11724	2.47598	2.22475	2.56908	2.15324	1.87865	2.20594	2.21204	2.10722	2.24006	2.20085	2.26093	2.05844	2.10703	2.26239	2.00084	2.19667	2.24258	2.19802	2.11944	2.22207	2.21289	2.20885	2.19648	2.10288
ABCG8	11737339_at	3.62008	4.2955	3.82204	4.21106	3.79988	3.48521	4.40648	3.6807	3.57209	3.69126	3.2953	3.67808	3.46785	3.97666	3.62226	3.56503	4.36947	3.7946	3.91493	3.43241	3.38709	3.65137	3.95029	3.80546	3.29522	3.90622	4.09676	3.66004	3.71388	3.77987	3.58512	3.54774	3.87034	3.67281	3.49239	3.55514	3.56639	3.75862	3.68571	3.91771
ABHD1	11755135_a_at	3.22156	3.6104	3.31169	3.54553	3.15979	3.04062	3.06601	2.93382	3.417	3.33284	3.0361	3.12418	3.0588	3.15244	3.31375	3.06134	3.23353	3.00943	3.22208	3.10804	3.14294	3.72191	3.04854	3.34051	3.00998	3.13149	3.04181	3.00747	3.34078	3.11653	3.34159	3.15035	3.10996	3.20695	3.06058	3.15659	3.08259	3.12506	3.30926	3.34323
ABHD10	11748225_a_at	6.4192	4.52253	5.09192	4.14483	4.5682	5.73368	4.28019	5.28661	5.16128	6.25409	5.50081	5.51004	6.8059	5.43714	5.16347	5.23118	5.02175	5.70647	4.69983	5.87228	6.07284	4.68771	5.52926	5.61977	5.87271	5.71647	5.16962	6.01948	5.32294	5.76331	5.22795	5.90158	5.98647	5.70805	5.56065	6.04584	6.26406	6.00984	6.23308	5.02933
ABHD11	11753629_x_at	3.68982	4.40497	4.57485	4.86177	4.75285	4.30833	4.6076	4.20991	4.36626	4.74972	4.25101	3.97916	4.34405	4.29202	4.25117	4.42062	4.66173	4.24682	4.26601	4.35301	3.55692	4.31179	4.51574	4.40194	4.66497	4.35934	4.34042	4.02107	4.72844	4.80776	4.32699	4.45546	4.68558	3.76124	3.91832	4.12735	4.26473	4.35219	4.20564	4.33828
ABHD12	11752979_a_at	2.90297	3.04009	3.14577	2.85727	2.76028	3.30981	2.95927	3.18965	2.98839	2.97932	2.9375	2.88929	3.39391	2.86031	3.03306	2.93883	2.95927	3.12275	3.08707	2.53328	2.73739	2.75041	2.95197	2.75863	3.15862	3.27276	2.86454	3.05571	2.59512	2.86653	3.28945	3.08057	2.91983	2.88294	2.7537	3.17731	2.97277	2.76287	2.81675	3.07934
ABHD12B	11738864_a_at	2.00854	3.2699	2.89078	2.94209	2.72464	2.40767	2.84505	2.59409	3.54979	2.60821	2.77174	2.51296	2.56314	2.60328	2.31379	2.61508	2.82362	2.97669	2.67953	2.77372	2.58685	2.39324	2.48667	2.5823	2.57912	2.72069	3.13834	2.66764	2.65414	2.47575	2.43571	2.78845	2.88044	2.89967	2.42999	2.75063	2.20329	2.81002	2.42478	2.64622
ABHD13	11730849_at	5.85788	3.58636	4.41407	2.9883	3.82166	4.94532	3.16779	5.39437	4.48051	5.5942	4.94436	4.79244	5.95787	5.30624	4.24038	4.57355	3.96759	4.90519	4.09411	5.29536	5.71694	4.77296	4.86744	5.53769	5.05835	4.91323	4.56567	5.3493	4.72536	5.12903	4.59525	4.99134	5.6191	5.09593	5.69029	5.2861	6.08311	5.42767	5.48622	3.78661
ABHD14A	11723542_a_at	5.75926	5.57376	5.98071	5.70423	5.98131	5.97747	5.74001	5.97854	5.98111	5.685	5.6871	6.43028	6.06652	5.6464	6.01665	6.04085	5.68044	5.99515	6.22408	6.25886	5.61778	6.23027	6.21841	5.91932	6.23012	5.71894	6.05635	6.20822	6.00668	5.99278	6.27544	6.17309	5.39325	5.99417	5.78251	5.47276	5.70656	5.77612	6.45328	5.96447
ABHD14B	11747813_a_at	4.28101	5.47854	5.22089	5.41106	5.36122	4.7387	5.53264	4.51971	5.03642	4.58003	4.78815	4.6222	4.76799	4.61462	5.04688	4.79284	5.33002	4.9053	5.15978	4.77576	4.41307	4.92031	4.85938	4.80467	4.64296	4.77782	4.95928	4.48688	5.03031	4.99718	4.84983	4.70312	4.86722	5.10644	4.78809	4.89923	4.59494	4.71485	4.49616	5.12567
ABHD15	11758985_at	5.42383	5.33107	4.91978	4.14115	4.7866	6.11118	4.40273	5.29104	4.56393	4.8353	5.14596	5.64711	5.04875	5.2283	5.58537	5.27051	4.65682	5.21224	5.06468	5.66944	5.17383	5.24939	4.80123	5.22301	5.43045	5.47652	5.4191	5.53524	5.40681	5.48792	5.72001	5.17684	4.51884	5.71207	5.00196	5.01817	5.30738	5.18978	5.88497	5.28902
ABHD16A	11753449_a_at	5.72634	5.93711	6.11475	6.01057	5.54914	5.82087	5.95603	6.77242	6.01446	6.15057	5.98834	5.51582	6.10254	5.93269	5.95005	5.6768	5.67237	6.17575	6.1882	5.89155	4.54511	5.97202	6.14159	5.89012	6.18093	6.33592	6.30161	6.00553	6.07177	5.84272	5.66777	5.93298	6.34376	5.4733	6.12308	6.14626	6.28463	5.90291	5.74725	6.28596
ABHD16B	11740936_at	3.47312	5.08812	4.43354	5.04181	4.75078	4.30679	5.27696	4.34024	5.11645	4.19208	3.89838	3.83435	3.4419	4.13857	4.30617	4.2553	5.03435	4.432	4.73323	4.09948	3.66374	4.24376	4.21731	4.13954	4.11515	4.19606	4.48538	3.99638	4.31455	4.25986	4.19261	4.16297	4.18229	4.32749	3.91927	4.20164	3.25093	3.99159	3.77329	4.46236
ABHD17A	11724844_s_at	8.899	8.5084	8.85995	8.38057	8.6158	8.45338	8.25986	9.69643	9.27665	9.25353	8.83266	9.9138	9.34661	8.86122	9.21294	9.12172	8.46035	9.30109	9.02468	9.41263	8.50505	9.32118	9.00799	9.11521	9.89574	9.16345	9.44012	9.80923	9.11243	9.08978	9.57478	9.41798	8.57163	8.84861	8.97662	8.99006	9.29503	9.25032	9.73198	8.98449
ABHD17B	11735464_a_at	6.14804	4.59936	4.70647	4.20596	4.61102	5.44065	4.66007	4.83487	4.62561	4.59667	4.71134	4.20415	4.83065	4.43577	4.39079	4.55302	4.59396	4.60787	4.65482	4.48013	4.70178	4.75088	4.82976	4.61533	4.78168	4.68051	4.10939	4.82661	4.63793	4.75593	4.39566	4.56634	4.9515	4.35237	5.1973	4.73241	4.99699	4.85267	4.85191	4.54072
ABHD17C	11752456_a_at	4.67017	4.32723	4.76816	4.39778	4.2996	4.88926	4.01623	4.26642	4.11161	4.10825	3.76853	4.08692	4.0177	4.50892	4.62894	4.60556	4.27598	4.62755	4.81534	4.38046	4.69844	4.42942	3.77966	4.05289	4.54472	3.98214	4.46571	4.01466	4.02877	4.26644	4.13454	4.38661	4.37289	4.3926	4.54706	4.22292	3.9463	4.44021	4.13582	3.63012
ABHD18	11751212_a_at	5.74404	3.72137	3.80198	4.07008	3.57054	4.4739	3.51321	4.93168	4.29352	4.89292	4.48015	5.04669	4.95049	4.43349	3.88215	4.14816	3.65939	4.37043	3.75871	4.57592	4.34435	4.44229	4.71965	4.04432	4.76834	3.65808	4.0734	5.13159	4.2142	4.5247	3.5526	4.79591	4.31519	3.88652	4.95175	4.49936	5.27433	4.29026	5.14496	4.63114
ABHD2	11746956_a_at	5.35026	5.68892	6.239	5.65991	5.16646	4.68659	4.59941	6.39949	4.86362	5.24296	5.83145	5.36199	5.3437	5.70316	6.48598	6.05028	4.88658	5.82613	5.90848	5.62435	6.52516	5.83595	6.36601	6.42617	5.95472	5.96561	6.20377	5.64226	6.384	5.77837	5.8449	5.45785	5.84764	5.75328	5.7616	5.67702	6.23929	5.77279	5.46924	5.67683
ABHD3	11746269_a_at	7.37844	6.63338	7.36877	5.80724	5.96162	5.78601	5.63739	7.99103	6.75582	7.93518	8.20472	7.76511	8.20497	7.50292	7.52115	7.79016	6.32367	7.61551	7.17441	8.04711	8.76985	7.58348	7.62212	7.93468	7.90596	7.27628	8.11081	8.15167	7.96019	7.78137	6.3936	7.99679	8.78617	7.4729	9.04024	8.52512	9.03648	7.73932	8.10873	7.01151
ABHD4	11749343_a_at	3.81152	4.12595	4.70453	4.54487	4.04406	3.91109	4.88909	4.45757	4.19609	4.15877	4.57405	2.99181	4.13716	4.2282	3.99149	4.34964	4.75795	4.35968	4.52945	3.99904	3.48918	4.03974	4.06211	4.12816	4.34891	4.7136	4.79814	4.19609	4.06745	4.22585	3.9444	4.06714	4.76281	3.86056	4.24055	4.30572	4.10198	3.79579	3.74553	4.17162
ABHD5	11723702_at	3.42817	3.23859	3.38384	2.6771	2.80238	2.15248	2.16583	4.01736	3.02263	3.55225	3.80439	3.73307	3.40091	3.56223	3.85232	4.04206	2.78328	3.27173	3.51686	3.57739	4.59422	3.63139	3.46507	4.10511	3.06447	3.74595	4.66572	4.02245	3.80587	3.75699	2.16284	3.05651	4.83897	3.09446	5.41371	3.62028	4.30729	3.53189	3.95476	2.99002
ABHD6	11752859_a_at	3.53826	3.70633	3.44535	3.25963	3.10609	3.87481	3.6606	3.57794	3.66084	4.2249	3.89778	3.89179	4.11766	3.98831	3.93819	3.72505	3.59787	3.85961	3.74085	3.84338	4.16356	3.81587	3.88085	3.55672	4.16356	4.06919	3.63423	3.88456	3.77306	3.70445	4.03832	3.85613	3.71826	3.41423	3.48199	3.73982	4.15234	3.19408	3.76644	3.8531
ABHD8	11751033_a_at	4.18825	4.26651	4.357	4.03735	4.25989	3.77386	4.42522	3.83939	4.19933	3.97773	3.84761	4.2202	3.76892	3.7892	3.99794	3.97237	4.58997	3.3213	4.08851	3.81348	3.28394	4.02976	3.98187	3.69715	4.15509	3.92548	3.90918	3.73873	3.96256	3.88716	4.32369	3.9358	3.99902	3.65679	3.98831	4.0726	4.24692	3.89283	3.64958	4.32789
ABI1	11749314_x_at	6.99005	5.74564	6.23044	6.07363	5.58905	6.59432	6.03485	6.48498	6.4648	6.51438	6.60647	6.31203	6.4542	6.56626	6.51176	6.56484	6.52727	6.58164	6.37899	6.62269	6.8477	6.66462	6.62214	6.58646	6.66084	6.59298	6.17688	6.81281	6.59849	6.51807	6.06221	6.42861	6.99784	6.28245	7.12819	6.27327	6.99486	6.62767	6.55753	6.15842
ABI2	11727021_a_at	3.51615	3.32185	2.90567	2.95527	3.04892	3.90554	3.46001	2.89236	3.26228	2.70421	2.8265	2.8724	2.81656	2.97398	2.71029	2.97959	3.19333	2.80727	2.86746	2.60421	2.60936	3.03488	2.87829	2.49082	2.72174	3.03853	2.60938	2.59578	3.05999	2.86151	2.9776	2.87761	2.64768	2.94965	2.447	2.56599	2.79018	2.81347	3.14805	3.07371
ABI3	11728347_at	5.73231	6.84731	6.42556	6.63726	6.84656	5.71626	6.03306	7.63004	6.93275	6.58223	7.10225	7.6339	7.03759	6.91047	7.32366	6.99781	6.61496	7.08507	7.01417	7.1497	7.36569	7.25833	7.18234	6.98624	7.57341	6.90336	7.13542	6.97676	7.1978	6.77913	7.71323	7.4279	6.7023	7.12848	6.68003	7.31238	7.55188	7.22738	6.95303	7.29842
ABI3BP	11719843_a_at	1.99041	2.18867	2.14616	2.13133	2.17361	2.13285	2.49012	2.15104	2.15019	1.67996	2.30099	2.43575	2.35497	2.26361	2.131	1.94757	2.16046	2.14022	2.13412	1.96289	2.76637	2.00477	2.34594	1.88359	2.03506	2.12192	2.37866	2.01894	2.18852	2.16071	2.19986	1.99616	2.39339	2.14676	2.20887	2.13853	2.18362	2.21595	2.26361	1.89538
ABL1	11717175_a_at	3.05611	3.26293	3.0957	3.09891	2.96625	3.25853	3.28064	2.79327	3.18202	2.95688	3.44746	3.17849	2.92165	2.98242	2.9914	2.75455	3.29632	3.28211	3.37743	2.94656	2.50284	3.31121	2.88796	2.91132	2.87622	2.76918	2.95233	3.16326	3.08045	3.07027	3.16467	2.98647	3.15562	2.79466	2.92016	3.08206	3.05138	3.05138	2.63512	3.26625
ABL2	11742113_a_at	2.48015	2.84815	2.50219	2.28631	2.8933	2.54904	2.73247	2.59396	2.75939	2.14859	2.40347	2.63163	2.07879	2.49097	2.63742	2.70157	2.51273	2.53724	2.57191	2.50322	1.90694	2.72307	2.52102	2.58558	2.47608	2.50632	2.53878	2.57142	2.49367	2.46319	2.601	2.4611	2.49213	2.46477	2.64773	2.47795	2.17501	2.48031	2.42095	2.45114
ABLIM1	11749709_a_at	3.57869	4.10683	3.61059	3.73871	4.48165	4.01725	4.07747	3.82937	3.91387	3.83381	3.837	4.50932	3.8431	3.97468	3.79499	4.34579	4.04927	4.35357	4.17719	4.02165	2.95424	3.89069	3.99408	3.55095	3.48433	3.72439	3.60531	4.07404	3.57999	3.5688	4.46406	3.88054	3.33597	3.96143	3.63126	3.53561	4.16099	3.23311	4.68688	4.09259
ABLIM2	11744322_at	2.90536	3.72818	3.79008	4.05845	4.15155	3.56942	4.29784	3.14967	3.97893	3.48651	3.00118	2.90014	3.32506	3.53004	3.60917	3.34593	3.95793	3.3524	3.66897	3.25521	3.1702	3.40335	3.46166	3.42242	3.44338	3.3252	3.23443	3.38701	3.45485	3.633	3.37643	3.15829	3.66023	3.34193	3.38239	3.50748	3.07831	2.99789	3.26124	3.95074
ABLIM3	11725427_a_at	2.6696	3.28659	2.74427	3.86147	2.83469	2.76446	2.99821	2.88446	3.18529	3.33551	3.1731	3.17751	2.26338	3.15118	3.17218	3.06286	3.29121	3.1731	3.51224	2.9623	2.49004	3.0732	2.89683	3.1214	2.91693	3.26714	3.18269	2.74621	3.1027	2.86948	3.21579	2.94143	3.00459	3.26147	2.86481	2.89212	2.63547	2.55056	2.43356	3.2058
ABO	11749352_a_at	4.32555	5.43885	4.91609	5.46394	5.48861	4.5336	5.5137	4.64031	5.73883	4.55133	4.51124	4.06782	4.41089	4.71744	4.60665	4.67414	5.3077	4.86587	5.03341	4.59064	4.29128	4.65163	4.55859	4.40078	4.50417	4.76546	4.63992	4.42725	4.66535	4.73575	4.69386	4.45385	4.60353	4.57076	4.36042	4.50259	4.19393	4.54467	4.16723	4.93938
ABR	11716686_a_at	2.6521	4.17681	4.52619	4.51211	4.39843	3.70112	3.94781	3.90322	4.20583	3.90245	3.42381	3.40883	3.05361	3.72577	3.5717	3.4723	3.77449	4.05738	4.16301	3.6714	3.18986	4.04354	3.4587	3.57397	3.56664	3.98111	3.83199	3.70873	3.77862	3.54601	3.59411	3.61951	3.73014	3.65412	3.14082	3.96099	3.40891	3.62449	3.40038	4.2241
ABRA	11734152_at	1.69941	1.73918	1.6744	1.84882	1.76733	1.87441	1.71717	2.05881	1.76473	1.91038	1.7893	2.10718	2.06487	1.82668	1.77847	1.87138	1.9714	1.76006	1.89217	2.0503	1.97923	1.63617	1.75327	1.87118	1.81993	1.78334	2.11723	1.81469	1.73468	1.76672	1.79455	1.88822	1.95996	1.73064	2.03298	1.9404	1.98359	1.79239	1.93239	1.85406
ABRACL	11721297_at	9.52985	7.57976	7.61486	7.6676	7.71463	8.16245	7.05362	8.00264	7.9729	8.41758	8.07497	8.52004	9.21701	8.32076	7.75485	7.84112	7.57956	8.07976	7.69815	8.30196	8.15217	7.97553	8.31443	7.55919	8.34976	7.99171	7.72035	8.32786	7.90698	7.96358	8.20979	8.59598	7.80589	8.033	8.52004	8.29757	8.65191	8.30044	8.44495	7.83533
ABT1	11758366_s_at	3.0092	2.51337	2.8297	2.12619	2.52209	2.51231	2.30194	2.66413	2.57117	3.17073	2.82608	2.90248	2.82843	2.83937	2.78466	2.72922	2.71986	2.70992	2.82608	3.05233	2.90331	2.91605	3.01258	2.85515	2.73437	2.60868	2.55276	2.67834	2.87927	2.91262	2.76703	3.50096	2.88119	2.68094	2.78709	2.67163	3.19064	3.00092	3.37039	2.3798
ABTB1	11764045_at	2.98543	3.49652	3.62052	3.63853	3.84355	2.94402	3.02179	3.26738	3.94369	3.10492	3.66361	3.295	3.03769	3.41702	3.63941	3.3229	3.43942	3.28261	3.57081	3.43274	2.86136	3.52634	3.21107	3.64221	3.11886	3.40669	4.00575	3.97952	3.71344	3.44073	3.18108	3.32469	3.58459	3.05004	3.49916	3.42585	3.32122	3.43942	3.69481	3.43347
ABTB2	11720877_at	2.88922	3.93021	3.81064	4.20954	4.07546	3.31073	4.5064	3.40437	4.1986	3.04573	3.397	3.47382	3.08622	3.29861	3.5474	3.46914	4.20319	3.25495	3.92853	3.29198	3.19168	3.39438	3.32339	3.18665	3.27226	3.62919	3.50615	3.38701	3.36666	3.34226	3.59744	3.22083	3.49169	3.63236	3.0541	3.517	2.58535	3.3908	3.03661	3.33285
ACAA1	11730542_x_at	6.58073	5.76102	5.8738	5.4527	4.94076	4.98088	5.27552	6.20684	5.48266	6.16078	6.08153	6.25837	6.29897	5.85734	6.35019	6.01154	5.78965	5.99304	5.91218	6.05796	6.24498	6.02846	6.24076	6.57416	6.03146	5.70884	6.7237	6.19209	6.20277	6.16934	5.93052	6.05274	6.70453	5.84089	6.85863	6.21905	6.95292	6.32213	6.5567	5.98231
ACAA2	11715767_s_at	7.99962	5.69616	6.05028	5.50789	5.4391	6.9227	5.12282	6.51068	5.43537	6.63569	6.42937	6.59537	6.74841	6.46659	6.67637	6.29588	5.56925	6.37505	5.92727	6.28669	6.93468	6.6802	6.62149	6.77388	6.97391	6.22495	6.51255	6.67399	6.28027	6.58146	6.44756	6.44826	6.46682	5.99425	6.3215	6.55385	7.20119	7.07339	6.75282	6.36788
ACACA	11754514_a_at	2.7583	2.65576	2.57543	3.06932	2.70273	2.51937	2.98532	2.63717	2.56304	2.12559	2.76448	2.21841	2.03826	2.55093	2.37514	2.54753	2.50872	2.62925	2.97174	2.49451	2.26089	2.57138	2.50955	2.40718	2.444	2.47741	2.35376	2.35306	2.42171	2.49199	2.43606	2.3546	2.25295	2.63653	2.42212	2.74891	2.54179	2.33063	2.29898	2.33537
ACACB	11750636_a_at	3.05463	3.61718	4.06099	3.84499	4.41859	3.32214	4.34871	3.65589	3.60934	3.32064	3.41041	3.58412	3.15378	3.3052	3.71251	3.66978	3.80318	3.54735	3.75376	3.47589	3.39522	3.51621	3.30746	3.48134	3.32029	3.60631	3.53438	3.34562	3.6012	3.58976	3.73268	3.55216	3.43092	3.856	3.29286	3.4786	3.07397	3.5013	3.24788	3.74343
ACAD10	11753097_a_at	2.40766	3.24005	3.01186	3.16816	3.1835	3.04416	3.50286	2.87548	3.45356	2.70465	2.66151	2.9341	2.7667	2.74105	2.7987	2.83483	2.87697	2.66097	3.06633	2.92459	2.62782	3.07987	2.58526	2.70247	3.0548	2.74065	2.76887	2.75779	3.0755	2.92918	2.82545	2.93925	2.66134	3.12038	2.94168	2.76324	2.8635	2.77565	2.647	2.98643
ACAD8	11761018_a_at	3.02897	3.01727	2.98761	3.67671	3.02206	2.84017	3.60866	2.71194	3.54464	2.90011	3.12906	2.78865	3.06252	3.06011	2.99551	2.84351	3.50387	3.16128	3.32131	3.00595	2.87827	2.91673	2.69988	2.94804	3.23218	3.32218	2.93793	2.73733	3.0161	2.73546	2.99392	3.17416	3.06379	3.23865	3.02708	3.11804	2.97037	3.19118	2.93049	2.69144
ACAD9	11751634_a_at	5.36863	4.40857	4.15704	3.85877	4.42139	4.93346	4.40862	4.62885	4.17321	4.88341	5.26188	5.02936	5.14286	4.6253	4.60115	4.95897	4.18417	4.88545	4.27204	4.86927	4.26538	4.33707	5.13719	4.44089	5.12111	4.57267	4.715	4.83973	4.98155	4.88619	4.86959	4.79589	4.68002	5.14238	4.48576	4.95412	5.49819	4.73078	5.14628	4.24952
ACADL	11757912_a_at	2.0212	2.15835	2.25655	2.16713	2.32522	2.02476	2.28449	1.87381	2.13154	1.90359	2.3925	1.95317	2.17967	2.04687	1.92679	1.94064	2.37115	2.01707	2.12163	1.91029	1.75683	2.06824	1.94743	1.84882	2.00465	2.25853	2.14063	2.01456	1.94423	2.09339	1.96705	1.88996	1.94439	2.11351	1.83105	2.12192	1.74025	1.89788	1.89766	1.92159
ACADM	11747344_a_at	6.22142	3.2278	3.33824	2.94812	3.48998	5.32228	3.15422	3.78422	3.57128	4.69978	4.05118	4.25332	5.03191	4.12135	3.19531	3.48901	3.47558	3.37653	3.43669	4.06006	4.24619	3.51069	3.93516	3.74171	4.13448	3.85791	3.71476	4.10726	3.84998	3.68072	3.7806	4.17415	4.08909	3.86885	4.28683	4.38091	4.99674	4.48397	4.3632	3.08397
ACADS	11749885_a_at	5.55909	5.20705	5.41772	5.41483	5.61034	5.28116	5.67398	5.22049	4.91602	5.05921	5.01193	5.14202	5.14485	4.73771	4.972	5.05616	5.10734	4.80168	4.9938	5.03594	4.47865	5.02683	5.08475	4.78515	5.15468	4.61285	5.28682	4.82765	4.82748	4.7532	4.96117	4.83673	4.75248	5.04365	4.77738	4.97823	4.66399	5.03138	4.81908	5.29603
ACADSB	11748196_a_at	3.09627	2.39905	2.85051	2.63083	2.79059	2.81478	2.55709	3.00209	3.31712	3.05968	2.78848	2.86556	3.19456	2.63885	2.73825	2.89948	2.80126	2.93779	2.60277	2.88364	3.11949	3.23378	2.73555	2.79521	3.10468	2.64986	2.77075	3.29309	2.55933	2.90774	2.55383	3.2458	2.50004	2.8304	3.16437	2.40597	3.17658	3.10468	3.57641	2.6997
ACADVL	11745736_a_at	6.22503	6.42377	6.08417	6.25861	6.15761	6.65694	6.73229	6.22889	6.33664	6.66206	6.41775	5.55303	6.56449	5.90816	6.09371	5.75355	6.0351	5.99682	5.77941	5.79625	4.63943	6.15363	5.68701	6.04316	6.09876	6.12421	6.10462	6.5451	6.07805	6.39957	6.1017	6.05796	5.92404	5.32441	6.02879	6.27041	6.44566	5.97245	5.84537	5.97097
ACAN	11725358_a_at	2.90732	3.91374	3.80745	3.86394	3.74855	3.27514	4.153	3.20323	3.50629	3.48397	3.48341	3.51798	3.34199	3.54764	3.57522	3.30829	4.00423	3.56232	3.51218	3.29927	3.14421	3.57926	3.42708	3.49991	3.51787	3.66459	3.46074	3.40676	3.1363	3.50251	3.6104	3.57546	3.40648	3.52862	3.3703	3.5334	3.10396	3.60071	3.06768	4.12562
ACAP1	11725476_at	8.05647	7.34658	7.45505	7.35728	7.06567	6.68141	6.85939	8.37406	7.70387	7.04562	8.2247	9.18819	8.42331	7.58299	8.22302	8.46037	7.41048	7.94257	7.73054	8.09026	8.10012	8.11763	8.04137	8.28417	7.81663	7.71478	8.01725	8.34354	8.09725	7.77566	8.3507	8.07732	8.10295	8.00664	8.42414	7.24505	8.01932	7.79136	8.50353	7.74506
ACAP2	11718323_at	5.02119	4.77046	5.42855	5.34268	4.11242	4.24546	3.41201	6.11979	4.87542	5.51356	5.78527	5.42344	5.48909	5.46515	5.85385	5.61683	4.30077	5.86102	5.62705	5.16625	6.64402	5.57069	5.95404	6.18734	5.54432	5.59046	6.15096	5.46915	6.06077	5.83273	5.09763	5.44026	6.58373	4.85829	7.01382	5.71218	6.13539	5.685	5.36357	5.26645
ACAP3	11746603_a_at	5.88724	7.23374	6.95052	7.03687	7.24712	6.53792	7.23324	6.5329	6.60464	6.54185	6.40931	6.52762	6.21477	6.71726	6.58604	6.42725	7.18491	6.56712	6.93644	6.433	5.92388	6.30361	6.52544	6.42262	6.49936	6.69862	6.73694	6.36885	6.50325	6.59469	6.53057	6.44364	6.32949	6.54603	6.3658	6.54321	5.96167	6.42443	6.01711	6.81617
ACAT1	11761280_at	3.10996	3.43356	2.82509	2.90812	3.11556	2.52802	3.33377	2.93156	2.97524	2.87618	2.92554	2.81433	3.13568	2.86556	2.54369	2.88999	2.88001	2.90083	3.01634	2.56563	3.25916	2.67824	2.9646	2.95574	2.93146	3.03241	2.64413	3.25858	2.84993	2.96743	3.0484	2.85011	3.10941	2.64472	2.85357	2.66912	2.72599	2.85887	2.97331	3.02602
ACAT2	11746009_a_at	7.51064	6.57263	7.21551	7.27916	6.99387	8.25441	6.71434	6.9832	7.36473	7.49229	7.14544	7.54795	7.19576	7.30483	7.05193	7.22491	6.89025	7.2214	6.92434	7.38733	7.30247	7.22516	7.31185	7.31686	7.52762	7.39248	6.95645	7.50305	7.22898	7.10396	7.28226	7.48529	6.61897	7.26939	7.2141	7.40489	7.19749	7.32935	7.46547	7.01793
ACBD3	11743566_at	5.08864	4.05392	4.01553	3.70272	4.37404	4.86739	4.56915	4.48452	4.36859	5.49246	5.5693	5.61005	4.85207	4.9763	4.79311	4.8798	4.64112	5.01696	4.8315	4.30823	4.55403	5.18729	4.85928	4.46314	4.10813	5.07581	4.99891	5.50258	5.0779	4.61693	5.47458	5.11102	4.64424	4.31784	5.70674	4.83397	5.76572	4.59302	4.52437	5.51205
ACBD4	11742135_at	3.15229	3.22349	3.58463	3.5304	2.988	3.41146	4.05434	2.8787	3.01753	3.01475	3.20563	2.78946	2.67487	3.10399	3.38175	3.26959	3.59583	2.7151	2.93791	3.28114	3.29053	3.09918	3.27445	3.04107	3.06764	3.08206	3.12573	3.12843	2.93616	3.06037	3.32459	3.12437	3.05156	3.17915	3.12437	2.87587	3.06649	3.01366	3.10399	3.12302
ACBD5	11721778_a_at	5.04654	3.49734	4.29637	4.14119	3.09771	3.67226	3.54236	4.45014	3.66489	4.97717	4.70235	4.53029	5.16431	4.77079	4.00654	4.27762	3.37507	4.29886	3.64108	4.21657	4.44252	3.96095	4.4717	4.3466	5.19428	4.50498	4.26081	4.65936	4.41972	4.26706	3.76581	4.83543	4.40193	4.07396	4.88596	4.75214	5.2354	5.18835	4.48082	3.87372
ACBD7	11740021_at	2.45902	2.70083	2.38343	2.55026	2.47084	3.02446	2.55913	2.29493	1.99029	2.16956	2.09193	2.42882	2.13588	2.14432	2.1995	2.27233	2.52493	2.22842	2.28066	2.32197	2.07323	2.32713	2.34396	2.01904	2.13657	2.26177	2.74684	2.02704	2.22842	2.30823	2.25597	2.20691	2.21385	2.22264	2.30412	2.12354	2.02643	2.15765	2.18292	2.45739
ACCS	11748868_a_at	3.38016	4.69048	4.31244	4.72427	4.63229	4.41986	5.30277	4.41084	4.54672	3.933	3.8843	3.80902	3.95932	4.33365	3.81197	3.87134	4.64803	4.43283	4.31273	3.69288	3.49482	3.87843	3.94846	4.16097	3.8224	3.67559	4.32673	3.97823	3.86325	4.08938	4.07602	3.99337	3.73211	4.03204	3.52984	3.94202	3.96707	4.039	4.08506	4.36414
ACCSL	11755699_a_at	3.15658	4.36921	4.08892	4.67746	4.36904	3.7299	4.46319	3.16435	3.76694	3.76863	3.68794	3.25977	2.96388	4.06681	3.77562	3.69069	3.83346	3.50028	3.77521	3.30517	3.04106	3.88762	3.50652	3.57636	3.56912	3.57549	3.62185	3.42772	3.63423	3.69854	3.74268	3.65581	3.52266	3.53643	3.40603	3.76766	3.00781	3.46879	3.06768	3.48361
ACD	11761411_at	3.1562	4.53684	3.76798	4.60048	4.53707	3.61948	4.57473	4.16741	3.74687	3.53986	4.02131	4.06795	3.69596	3.75821	3.96023	3.50525	4.10313	3.90218	4.05727	3.57732	3.77613	3.7479	3.62197	3.55799	3.74903	4.06141	4.03572	3.77999	3.92286	3.44563	4.03535	3.5179	3.89969	3.96494	3.35206	3.77436	3.3018	3.39299	3.57885	3.77311
ACE	11744189_a_at	2.96705	4.21508	3.18814	3.61049	3.70906	3.255	4.13241	2.89771	3.70534	3.34297	3.19349	3.53537	3.25882	3.48779	3.45586	3.352	3.93878	3.39214	3.40196	3.189	3.25156	3.3234	3.23929	3.20836	2.79152	3.53422	3.29542	3.08546	3.09835	3.4174	3.29542	3.37691	3.46363	3.28026	3.31987	3.48358	2.95062	3.5474	2.98448	3.24092
ACE2	11725624_at	2.13294	3.12679	2.7441	2.88028	3.02242	2.24895	3.00579	2.61207	2.6961	2.31784	2.42935	2.66923	2.50718	2.51165	2.52675	2.64947	2.79026	2.38208	2.51984	2.62037	2.58251	2.4675	2.63151	2.46118	2.61069	2.63462	2.64369	2.54212	2.38329	2.3186	2.22676	2.268	2.44217	2.6083	2.45117	2.67133	2.34461	2.53993	2.36111	2.4191
ACER1	11737873_at	3.78796	4.54331	4.19506	4.22274	4.5671	4.1021	4.30589	4.16575	4.92576	3.82777	4.32106	4.22972	4.1907	3.9685	3.92656	4.15125	4.06696	4.14532	4.29452	4.02131	4.10555	4.1388	4.13105	3.69869	4.14955	4.30667	4.11337	4.06233	3.7587	4.13953	4.20037	4.09398	4.08562	4.00662	4.06226	3.85966	3.92206	4.07535	4.01938	4.41901
ACER2	11732799_at	2.03365	2.27654	2.13223	1.9592	1.84735	2.0288	2.22349	2.35792	2.1231	1.97862	1.98783	1.95943	1.95531	1.97271	2.11889	1.94911	2.21293	1.9649	2.05188	1.89624	1.88605	1.83558	1.99896	2.11004	2.01284	2.22144	2.00853	1.9816	2.01885	2.04131	1.94861	2.11914	2.0261	2.0414	1.85719	2.11197	2.11396	2.15922	2.12944	1.94064
ACER3	11724860_a_at	2.16258	2.11545	2.97245	2.6949	2.21051	2.57685	2.28187	2.80192	2.27298	2.6763	2.82896	2.21955	2.90644	2.18795	2.34277	2.31727	2.85212	2.18247	2.68697	2.57377	2.60905	2.02427	2.22549	2.49641	2.41261	2.76924	2.6763	2.33766	2.45462	2.6262	1.94067	2.84275	2.29993	2.14878	2.99642	2.64576	2.924	2.84872	2.42904	2.01779
ACHE	11733279_a_at	3.23498	4.66301	4.42464	4.11767	4.5137	3.80511	4.46851	3.67715	4.08294	3.42764	3.55588	3.39236	2.92169	4.00011	3.82207	3.73482	4.26186	3.60403	4.08729	3.554	2.97225	3.83825	3.74342	3.46	3.56843	3.90166	4.02707	3.45962	3.67117	3.75807	3.80982	3.75338	3.66238	4.21413	3.32625	3.68923	2.84714	3.75747	3.49627	4.20332
ACIN1	11750382_a_at	5.30851	5.38124	5.3428	5.17753	5.14043	5.04018	5.19915	5.36086	5.34172	4.70236	5.60353	5.28052	5.23495	4.87923	5.60759	5.36232	4.9104	5.19493	5.1047	5.43823	6.17472	5.07027	5.02663	5.20364	5.13403	5.1953	5.12448	5.42681	5.23674	5.03295	4.61187	5.13016	5.0934	5.18408	5.35823	5.04146	5.79783	5.22403	5.44585	4.77659
ACKR1	11757035_a_at	5.40057	6.80738	7.76635	7.20443	7.7813	6.08471	8.08922	6.12898	7.11831	6.04927	5.61577	5.32514	5.89773	6.59556	5.96869	6.17307	6.73093	6.12505	7.12226	5.66025	5.70363	5.94291	5.80896	5.95449	5.81216	6.20898	5.84412	5.83923	5.88497	5.92412	6.013	5.98336	6.14285	6.12681	5.82408	5.99269	5.17348	5.95699	5.54875	6.56508
ACKR2	11731716_at	2.03365	3.01873	3.09318	3.94747	2.6018	3.46455	3.31904	3.91308	2.88807	2.27547	2.82133	2.62831	2.66308	2.97994	2.67498	2.25534	3.06197	2.59848	3.1387	2.54183	2.5828	2.68999	2.18368	2.35067	2.11284	2.58657	2.20252	2.23975	2.2273	2.40882	2.39726	2.71519	2.24154	3.05533	2.14756	2.45224	2.28584	2.3713	2.27907	2.45715
ACKR3	11752501_a_at	3.30286	3.63299	2.91925	3.5304	3.50083	3.3471	3.67595	2.93243	3.45008	3.693	2.79232	3.26853	3.13734	3.56647	3.57625	3.38415	3.76589	3.44801	3.32873	3.27493	3.453	3.16597	3.26438	3.48287	3.30752	3.57724	3.38273	3.38345	3.296	3.33846	2.68702	3.41856	3.41073	3.28154	3.23407	2.96506	3.32902	3.49501	3.508	3.08653
ACKR4	11741286_a_at	2.30576	2.42857	2.38024	2.34316	2.29991	2.68264	2.26274	2.08906	2.60148	1.92484	2.53262	2.30411	1.99809	2.27935	2.03734	2.24262	2.3284	2.29815	2.57632	2.21649	2.30805	2.40872	2.20532	1.97407	2.29276	2.26523	2.25107	2.25919	1.90972	2.25011	2.42914	2.28702	2.2794	2.28294	2.28655	2.11548	2.30278	2.17366	2.30967	2.35062
ACLY	11720620_s_at	7.10531	5.81203	5.7502	5.97234	6.23424	6.78582	6.58664	6.3909	6.10979	6.20664	7.06598	6.78086	6.65134	6.27428	6.63964	6.63946	5.70939	6.52243	6.29103	6.57092	7.29263	6.54511	6.51244	6.66885	6.57011	6.14561	6.39695	6.59077	6.45566	6.47015	6.31007	6.60142	6.35702	6.2342	6.38998	6.30434	7.03999	6.40984	6.5875	6.09045
ACMSD	11727335_a_at	3.03124	4.36881	3.58087	3.96708	3.96182	3.67548	4.11098	3.32131	4.1352	3.56072	3.55763	3.13207	3.17604	3.5478	3.67113	3.59375	3.90541	3.6103	3.8539	3.45812	3.26788	3.78697	3.39581	3.32573	3.63368	3.69239	3.47289	3.57251	3.68654	3.51415	3.35065	3.4531	3.50923	3.67587	3.30147	3.71252	2.97444	3.52528	3.27631	3.6291
ACO1	11764092_at	2.51498	3.05648	2.48522	2.35222	2.42286	2.22227	2.77706	2.10731	3.18112	2.29854	2.4679	2.42883	1.99197	2.38549	2.44255	2.53001	2.4633	2.43394	2.61036	2.46604	2.34596	2.38568	2.32405	2.25877	2.56099	2.49583	2.38568	2.6056	2.55707	2.65688	2.41354	2.39082	2.41475	2.37737	2.12619	2.64156	2.3113	2.43348	2.41904	2.56323
ACO2	11743048_s_at	5.90316	6.37162	5.75735	6.35429	6.49464	6.14758	6.80115	6.26154	6.508	5.71855	6.28875	6.30703	5.93573	5.84598	6.21577	6.02456	5.97026	5.96351	5.84768	6.0735	5.49969	6.10613	6.05452	6.09471	6.12124	6.11102	5.93618	5.87454	5.97598	6.0472	6.37769	5.86479	5.82643	6.03019	5.68656	6.18102	6.74518	6.01745	5.94106	5.78675
ACOT11	11730887_a_at	2.8921	3.20242	2.8761	3.15589	3.30319	2.66924	2.87944	3.00471	2.57049	2.71404	2.83076	2.88947	2.38744	2.87597	2.97432	2.73763	2.88375	2.47645	3.19504	2.7314	2.79043	3.06912	2.74324	2.81307	2.5152	2.70799	2.80763	2.865	2.79865	2.89052	2.7061	2.77057	2.61887	2.7347	2.45577	2.98507	2.68443	2.88916	2.8954	2.81026
ACOT12	11740277_at	2.30802	3.94624	3.32459	3.47947	3.84729	3.08899	3.76114	2.73356	3.32905	2.89967	3.10871	2.9661	3.17583	3.18694	2.90482	3.20208	3.86093	3.00998	3.27245	3.06653	2.91957	2.93595	2.96507	3.0819	2.97126	3.14392	3.1043	2.89785	3.00136	2.9736	3.2553	2.96428	3.04306	3.03469	2.77874	3.0135	2.49933	2.90006	3.11589	3.36118
ACOT13	11721111_a_at	6.52479	5.01901	5.42421	5.1233	4.91568	5.66826	4.92804	5.69998	5.66426	5.98186	4.94893	5.02918	5.2212	5.24006	5.10238	4.65799	4.77356	4.99343	4.78091	5.19045	5.33055	4.94893	6.00605	5.49716	5.2854	4.61487	5.18825	4.96145	5.10824	4.6052	5.0385	5.46995	5.57001	5.35419	5.80982	5.37398	5.33531	5.32151	5.34568	5.44179
ACOT4	11727192_at	3.43339	3.50151	3.8819	4.13772	3.22709	3.52226	3.87466	3.15107	3.3889	3.566	3.3908	4.61419	3.22408	3.63678	3.72254	3.33006	3.19387	3.67352	3.47558	3.46697	3.22489	3.66606	3.20298	3.31465	3.6295	3.30906	3.64983	3.38321	3.63423	3.18333	3.58112	3.18876	3.05606	3.15717	3.1183	3.73196	3.15478	3.19387	3.66233	3.34779
ACOT6	11737151_at	1.79643	2.75764	2.61296	3.00999	3.0217	2.63244	2.72544	2.42071	2.75736	2.56563	2.39776	2.40579	2.3287	2.48621	2.4552	2.53215	2.98304	2.48245	2.80671	2.51394	2.20406	2.26509	2.73453	2.22507	2.25354	2.35208	2.62739	2.31992	2.50413	2.51594	2.27483	2.3287	2.52672	2.62226	2.3121	2.53854	1.9823	2.38075	2.358	2.70452
ACOT7	11761259_at	2.58544	3.2975	2.95789	2.85423	3.06011	2.59145	3.42613	2.65583	2.7808	2.71068	2.95535	2.52821	2.36177	2.73605	2.49742	2.89017	2.78171	2.94776	2.97578	3.0154	2.72632	2.69648	2.6528	2.68563	2.77226	3.1315	2.74821	3.22603	2.8222	2.6745	3.00054	2.41163	2.80319	2.65906	2.86791	2.4193	2.70383	2.58811	2.4193	2.90123
ACOT8	11760868_a_at	2.65171	3.35245	3.14069	3.28619	3.08306	2.71347	3.57794	2.51556	3.04971	2.84159	2.95178	2.82056	2.82694	2.88454	2.86986	2.94039	2.99931	2.91617	3.3448	2.56047	2.8369	3.41561	2.92697	2.93593	2.99086	3.031	2.9187	2.9417	2.7024	2.80965	2.69356	3.01403	2.82529	2.58175	2.92268	2.99642	2.82029	2.95809	2.97799	3.29872
ACOT9	11736329_a_at	7.02619	5.35966	5.93173	6.35073	5.47989	5.43619	5.07691	6.74985	5.39577	6.78681	6.86203	6.32064	6.99132	6.19938	6.58491	6.05068	5.34729	6.34414	5.59872	5.97792	7.02205	6.05617	6.82994	6.66108	7.01851	6.10074	6.53818	6.3521	6.72633	6.52242	6.07846	6.75682	6.88126	6.1917	6.82226	6.89653	7.42953	6.94757	6.63797	6.28752
ACOX1	11750711_a_at	5.78194	5.93711	6.38505	5.79593	4.96383	4.97898	4.17823	7.16401	5.44698	6.35922	6.79771	6.39992	6.15885	6.62754	7.15383	7.09508	5.43714	6.72955	6.73071	6.5605	7.66843	6.65181	6.95071	7.13386	6.51401	6.90107	6.9385	6.68206	7.36323	6.94824	5.91272	5.94693	6.82659	6.43024	7.52861	6.16636	6.68001	6.79249	6.59276	6.24625
ACOX2	11721223_at	3.05319	4.28788	4.77848	4.09385	4.21872	3.57852	4.41226	3.35391	3.50968	3.68967	3.43467	3.29362	3.21644	3.79317	3.73811	3.23343	3.90756	3.77866	3.56636	3.58212	3.25533	3.51069	3.42429	3.4607	3.06455	3.37842	3.57385	3.0559	3.7172	3.59281	3.58211	3.68207	3.49005	3.97195	3.25833	3.67371	3.46503	3.7736	3.4129	3.85832
ACOX3	11737303_a_at	6.12653	4.9051	5.28241	4.77461	5.20772	5.29291	5.19207	5.39594	5.02952	5.83666	5.73284	6.35975	5.64186	5.50299	5.62643	5.68898	5.60821	5.31552	4.99255	5.41637	5.37981	5.40873	5.75366	5.48893	6.09968	5.55243	5.33185	5.34353	5.64107	5.45924	5.91481	5.51697	5.26691	5.53264	5.64875	5.53601	5.64944	5.72704	5.68149	5.42238
ACOXL	11737596_x_at	1.59517	1.96785	1.56436	2.04618	1.86754	1.79472	1.84236	2.05881	1.84013	1.88861	1.79631	1.67448	1.74906	1.82238	1.81849	1.81842	1.71936	1.62188	1.84455	2.16884	1.68764	1.97332	1.65332	1.84149	1.80388	1.84947	1.84013	1.62	1.77398	1.71199	1.85707	1.65964	1.91726	1.82443	2.14602	1.89586	2.04618	1.91374	1.70475	1.94263
ACP1	11741529_at	2.77344	2.96291	2.98737	3.1944	3.364	3.05581	3.329	3.13025	3.12617	3.25834	3.07801	3.02664	3.2337	2.9957	2.91925	3.00927	3.19243	3.05022	3.01803	2.87195	2.66848	3.20263	3.02723	3.09531	2.83164	3.34863	3.05163	3.10517	3.24452	2.99265	3.30605	3.0485	3.20557	3.06588	2.86879	3.42575	3.29405	3.24641	3.12682	3.09919
ACP2	11762331_at	3.5117	3.93256	3.964	4.32223	3.73704	3.60541	3.83556	3.46056	3.55271	3.25751	3.28661	3.10346	3.42909	3.45356	3.28722	3.86809	3.82702	3.62109	3.99583	3.61733	3.34435	3.99714	3.77942	3.4555	3.56398	3.58979	3.8389	3.60167	3.38815	3.5571	3.86802	3.56596	3.77591	3.63296	3.43786	3.83192	3.24296	3.3761	3.35282	3.78743
ACP5	11717981_a_at	6.72108	8.3555	9.84405	7.62103	9.8306	6.7907	9.35877	7.32325	9.13316	7.14877	7.07797	7.27007	6.81262	7.31365	7.10929	7.01303	8.2582	7.22125	7.19387	7.08411	6.43271	7.0486	7.43809	6.89342	7.17843	7.10795	6.93741	6.99162	7.40867	7.25322	7.37019	6.7424	6.73106	7.10466	6.86731	6.81361	6.91105	7.27115	6.83768	7.5809
ACP6	11721112_a_at	5.30634	3.83626	4.24992	3.44576	3.46715	4.22458	3.1788	3.26991	3.56836	3.5583	3.93188	4.11995	3.33766	3.47951	4.00195	4.36679	3.86342	3.46462	3.66348	4.18328	3.98179	4.30068	3.85855	3.88005	3.95517	3.73342	3.49556	3.69578	4.02541	4.11068	3.97794	3.83719	3.80943	4.02519	3.65107	3.39151	3.52378	4.05707	4.63705	3.76546
ACPP	11739048_at	2.86326	3.2529	2.95071	3.15234	2.95707	2.61445	2.88553	3.05879	3.48871	3.22814	4.02871	3.27874	2.94027	3.2346	3.50714	3.31166	3.2468	3.63462	3.44683	3.13004	3.44535	3.00391	3.13468	4.09484	3.10775	2.61498	3.64587	3.23233	3.87367	3.38384	3.32787	3.33955	3.26438	2.89967	3.26543	3.11997	3.73023	4.02345	3.04581	2.75936
ACR	11735563_s_at	4.01812	4.94058	4.7536	4.82505	5.39974	4.29452	5.47482	4.482	4.99202	4.38827	4.33138	4.26215	3.95643	4.62456	4.90037	4.49094	4.88519	4.6122	4.91249	4.49295	3.95384	4.60802	4.5157	4.31384	4.31294	4.57116	4.49077	4.13569	4.43542	4.49653	4.5427	4.68116	4.36881	4.65621	4.05167	4.76922	4.03383	4.25965	4.32856	4.66818
ACRBP	11754458_a_at	6.21101	6.03244	5.9672	9.02167	7.60187	7.87558	7.85647	8.59957	7.24304	9.37266	7.92803	9.10116	8.23024	8.43731	8.6488	8.7256	7.64085	9.33597	9.01627	7.95438	8.21954	8.89041	9.16682	8.03735	8.37133	8.84029	8.64913	8.52099	9.31481	7.96449	8.95673	7.84254	9.24202	8.55261	7.64349	8.49505	7.55394	8.17692	7.83078	8.65484
ACRV1	11732536_a_at	3.00413	3.77948	3.58463	4.10627	3.7923	3.67721	4.09777	3.52884	3.9481	3.13075	3.45851	3.78895	2.98464	3.65754	3.53611	3.63858	3.79886	3.32578	3.75492	3.3222	3.13733	3.53414	3.34017	3.39309	3.48489	3.54611	3.59421	3.31176	3.51548	3.54829	3.48355	3.65921	3.21279	3.52211	3.17039	3.61493	2.79552	3.3173	2.92094	3.91149
ACSBG1	11752888_a_at	3.39449	3.6104	3.81376	3.44971	3.63923	3.65715	3.89812	3.05075	3.57587	3.24503	2.99886	3.45008	2.90093	3.5478	3.64104	3.43962	3.92402	3.32914	3.72322	3.37204	3.12211	3.25203	3.49962	3.437	3.63401	3.58839	3.80317	3.38363	3.78038	3.47993	3.67332	3.24964	3.2649	3.56312	3.30958	3.32072	3.24464	3.48729	3.31122	3.56761
ACSBG2	11728418_a_at	2.68359	2.81364	3.45397	2.92962	2.89491	2.4837	2.94449	2.95865	3.04546	2.89967	2.95153	2.97192	2.40551	2.66403	3.10441	3.0776	2.8106	2.86316	3.1425	2.7236	2.55149	3.09816	2.61427	2.89729	3.03622	3.17075	2.84234	2.97889	2.9798	2.81971	3.0772	2.85319	2.73688	3.05236	2.75351	3.02818	2.72964	2.75933	2.71519	3.04378
ACSF2	11719035_a_at	7.61869	5.78254	5.20276	5.20296	5.70922	6.25378	5.19127	5.92533	6.01381	6.23811	6.66713	6.82996	6.24314	6.04882	6.54793	6.17888	5.88972	6.12028	6.02432	6.02808	6.39628	6.48523	6.32859	6.25382	6.26981	6.02458	6.12099	6.33709	6.18583	6.12712	6.18536	6.31172	5.86411	5.94651	5.58911	6.15894	6.2824	6.22583	6.36812	6.15674
ACSF3	11754897_a_at	5.0893	5.01079	5.25726	4.86637	4.83597	4.71382	4.56546	4.93369	4.86066	4.41305	4.57629	4.65702	5.0735	4.34676	4.97889	4.83307	5.00259	4.6535	4.60667	4.46736	5.24961	5.39589	4.64039	4.6254	4.58154	4.956	4.66373	4.49475	4.88847	4.51051	4.59497	4.23847	4.74114	5.13886	4.63496	4.68711	4.74014	4.56546	4.38861	4.56591
ACSL1	11750700_a_at	8.97932	10.2442	10.6506	9.84893	8.37105	8.21917	7.64348	10.4764	9.74931	8.9932	10.5767	9.40599	9.67625	10.0713	10.8048	10.6211	8.67681	10.3451	10.2483	10.0261	11.8046	9.86409	10.3639	11.0352	9.90871	10.2715	11.2319	10.0603	10.4549	9.817	9.70853	10.0832	12.0795	9.47463	11.9956	10.1132	11.2631	10.2003	9.84502	9.18383
ACSL3	11743606_a_at	6.98151	4.72015	4.58653	4.86595	4.11301	5.37111	4.2622	6.04371	4.94476	5.53828	6.1725	5.41432	5.57322	5.01249	5.44438	5.46419	4.35815	5.33242	5.16572	5.35753	6.31245	5.31195	5.83023	5.85795	5.64064	5.45091	5.53521	5.79724	5.54439	5.40681	5.02111	5.71642	5.87881	5.07339	6.29635	5.68615	6.53036	5.37959	5.70785	5.01401
ACSL4	11752258_a_at	2.77486	2.52835	1.95233	2.12812	1.92072	2.45158	2.21448	2.59395	2.44373	2.75923	3.34301	2.38684	3.39238	2.86834	3.00518	2.61746	2.06568	2.74181	2.47449	2.73213	3.942	2.57277	2.83036	2.98882	3.16179	2.64885	2.95791	2.91363	3.00872	2.21784	2.45611	2.68831	3.42038	2.30664	3.41998	2.98219	3.67385	2.56565	2.72152	2.15327
ACSL5	11763676_at	1.75764	2.30111	1.71999	1.95203	2.57005	2.07268	2.00998	2.12439	1.81464	1.9794	1.97785	2.42738	1.58345	1.89584	1.83679	1.74682	2.35983	2.04319	2.04102	1.79628	2.27022	1.91118	1.91934	1.64048	1.88025	1.88123	1.88025	1.68449	1.97147	1.60116	1.78047	1.60172	1.91178	1.96113	1.79038	1.82046	1.82115	1.80383	1.78018	1.86002
ACSL6	11761648_at	1.82237	1.91963	1.82947	1.82855	2.04744	1.67111	2.22349	1.66799	1.98607	1.79926	1.74417	2.07913	1.80965	1.76914	1.70179	1.76089	1.9163	1.80812	1.78111	1.72549	2.09298	1.95739	1.67614	1.69402	1.70061	1.80965	1.77101	1.74615	1.67284	1.90358	1.6645	1.86056	1.94598	1.72254	1.91882	1.71253	1.77919	1.8578	1.92938	1.83207
ACSM1	11740696_a_at	3.00071	3.49652	3.83093	4.08675	3.81119	3.31798	3.4454	3.53102	3.82891	3.12602	3.48367	3.45356	3.11806	3.49674	3.48338	3.34629	3.52346	3.4199	3.52327	3.45325	3.34878	3.43858	3.35868	3.29682	3.05951	3.28345	3.70695	3.39988	3.34048	3.5715	3.47187	3.25666	3.2964	3.44846	3.31002	3.5291	3.25044	3.22049	3.34378	3.77566
ACSM2A	11760132_at	2.53481	3.34979	3.36289	3.4534	3.04725	3.13395	3.29191	3.10928	3.3187	2.8855	2.92167	3.03394	2.40345	3.39328	3.03561	3.49437	3.55679	3.14866	3.67308	3.16609	3.23578	3.05687	3.21107	3.17722	3.04776	2.98591	3.54984	3.05184	3.54682	3.1132	2.96616	3.10192	3.30906	2.96786	2.72624	3.44621	2.50705	3.03317	2.8744	3.33037
ACSM2B	11743944_x_at	2.90297	3.50916	2.98755	3.50146	3.37932	3.13601	3.8762	2.95562	3.28762	2.80519	2.85758	2.86556	2.79863	3.06914	3.38097	2.91895	3.39409	3.14353	3.27825	2.99949	2.91267	3.24754	2.85258	3.18665	3.17029	3.08206	2.97362	3.2287	3.00269	2.86467	3.29555	3.0844	2.8933	2.97765	2.84542	2.94964	2.72881	3.05333	2.80493	3.49148
ACSM3	11727427_a_at	5.90171	6.21125	5.92618	4.18293	8.21222	5.44398	7.61607	3.14455	7.03715	4.5259	4.1796	3.23436	4.93568	4.1055	3.872	4.18631	4.10767	4.14811	3.55768	3.98107	4.76245	4.27959	4.5286	4.19261	3.94742	4.03464	3.16838	4.93312	3.34658	4.05328	3.4103	4.28148	3.56629	4.0561	3.9075	4.19712	3.49169	3.61816	4.27016	3.10118
ACSM4	11741930_at	2.35646	2.47167	2.87099	2.32647	2.64658	2.44876	2.85872	2.76497	2.33627	2.79157	2.60131	2.51233	2.51828	2.26073	2.5436	2.43087	2.59627	2.69473	2.77566	2.46079	2.17497	2.63391	2.54179	2.61307	2.72562	2.63462	2.3112	2.52469	2.55554	2.62857	2.50805	2.42617	2.60132	2.23453	2.42016	2.53118	2.36603	2.50164	2.45206	2.48909
ACSM5	11727524_at	3.46711	4.48179	4.32559	4.40891	3.80856	3.54022	4.86006	3.35391	3.9002	3.6104	3.8018	3.42999	3.05211	3.76034	3.84516	3.77008	4.43995	3.98711	4.01421	3.48918	3.71077	3.83102	3.71019	3.78053	3.64823	3.67622	4.03282	3.87723	3.74014	3.8499	3.79688	3.64733	3.89297	3.74381	3.47334	3.86777	3.65811	3.64172	3.50759	3.98757
ACSM6	11734420_at	2.01712	2.63113	2.50975	2.56118	2.55117	2.26818	2.59862	2.37825	2.25957	2.08758	2.08492	2.0078	2.21046	2.18619	2.27776	2.34858	2.53724	2.10307	2.2819	1.96472	2.00025	2.15731	2.14707	1.9794	2.10046	2.42018	2.4178	2.31637	2.1574	2.20183	2.07947	2.13338	2.10745	2.07268	2.18629	2.27962	2.10933	1.93185	1.92936	2.63064
ACSS1	11748958_a_at	6.4792	5.44852	5.17224	5.38448	5.35605	6.4857	5.43442	5.67163	5.79286	5.41283	6.11213	5.6965	5.69777	5.73803	5.71374	5.7282	5.60169	5.7074	5.29678	5.75418	5.58761	5.97945	5.67967	5.46191	5.93165	5.54716	5.34312	5.86345	5.69777	5.81175	5.8221	5.65167	5.49992	5.645	5.66239	5.54896	6.10161	5.72967	5.90557	5.34268
ACSS2	11753466_a_at	4.36235	4.13384	4.71397	4.14719	4.30207	3.91499	3.68052	4.51166	4.04181	4.38891	4.55403	3.99643	4.61946	3.97545	4.88795	4.39913	3.81764	4.2299	4.16799	4.28978	4.79493	4.25295	4.66668	4.14789	4.24595	4.14502	4.91148	4.13499	4.23733	4.15301	4.24373	4.12881	5.01967	4.16818	4.25571	4.24877	4.71606	4.42031	4.31373	4.24076
ACSS3	11759049_at	2.03365	2.29412	2.54266	2.77375	2.41006	2.24344	2.8649	2.27159	2.58316	2.08277	2.21918	2.22161	2.44188	2.5665	2.42031	2.47493	2.2785	2.30037	2.31504	2.21918	2.16117	2.33195	2.48069	2.23031	2.15104	2.14821	2.4111	2.01239	2.25459	2.29017	2.14562	1.90125	2.15375	2.08589	2.30037	2.21493	2.04548	2.40507	1.82628	2.24872
ACTA1	11743109_x_at	3.83248	4.3801	4.55722	4.45555	3.9951	3.9728	4.75943	4.15773	3.88022	3.75806	4.3512	3.92822	3.85259	4.08768	4.0785	4.22963	4.09537	4.22847	4.38551	4.15242	4.16441	3.94095	3.88201	4.17586	4.50134	4.08394	4.0739	3.87283	4.24419	3.94947	3.94785	4.04654	3.99372	3.99223	3.66626	3.92101	3.74927	4.08424	3.9455	4.15593
ACTA2	11758869_at	1.82237	2.34753	2.09575	2.6771	2.2451	1.86745	2.80851	2.08074	2.27438	1.98252	2.01346	1.93789	2.05881	2.02517	2.13039	2.0706	2.62929	1.77742	2.25803	2.03139	2.07787	2.05653	2.01276	1.97421	1.93819	2.02841	2.11954	2.08628	2.00454	2.023	2.06693	2.18867	2.46541	1.86978	2.08994	2.2282	2.28415	2.18372	1.95623	2.12292
ACTB	11752865_x_at	11.8307	11.8473	12.0797	12.1459	11.2654	12.0006	12.0374	12.7928	12.5336	11.9694	12.5533	12.5219	12.9201	12.1832	12.3999	12.5324	11.7566	12.3099	12.1774	12.3345	12.7794	12.2732	12.1984	12.5347	12.4605	12.0782	12.3624	12.3557	12.7128	12.5361	12.3274	11.9585	12.3347	12.0435	12.2552	12.2448	12.266	12.3708	12.331	11.8874
ACTBL2	11738453_at	1.80699	1.9026	1.78626	2.0383	1.8668	1.96674	2.09529	1.97822	2.20207	1.9306	1.70948	1.77639	1.99387	1.85132	2.10323	1.83151	1.78569	1.77783	1.84733	2.12288	1.7978	1.76798	1.84882	1.85119	1.75492	1.86197	2.02084	1.97212	1.80993	1.76794	1.73274	1.99406	1.6571	1.75248	1.70468	1.7755	1.77639	1.80968	1.62067	1.89002
ACTC1	11720489_a_at	2.38833	2.75107	2.67929	2.5828	2.53684	2.48753	2.82595	2.47713	2.31158	2.09771	2.45355	2.23859	2.63869	2.61966	2.57754	2.5787	2.69082	2.41574	2.34093	2.72553	2.6771	2.82058	2.81543	2.40181	2.43803	2.60069	2.40216	2.56391	2.63009	2.58223	2.52514	2.27038	2.53449	2.68426	2.67737	2.6414	2.35382	2.37486	2.44336	2.86285
ACTG1	11758042_x_at	11.8102	9.03356	9.2871	9.17842	9.02135	10.0534	8.70428	11.3856	11.0888	10.8589	11.7727	12.0141	12.2055	10.093	10.2491	10.3223	9.12215	10.1709	9.95095	10.2366	11.7789	10.349	10.3367	10.5272	10.7136	10.0693	10.1952	10.5205	10.3616	10.3105	10.4099	10.2693	10.0546	9.76386	10.4886	10.2079	11.1799	10.5806	10.9244	9.89538
ACTG2	11715793_a_at	1.92416	2.31726	2.08092	2.10037	2.46671	1.83198	2.75115	2.23802	2.1178	2.10798	2.29854	2.00685	1.77469	1.94443	2.06012	1.78808	2.21633	2.01044	2.02124	2.00898	2.59264	1.92039	1.95777	1.87175	1.92228	1.87562	2.06367	1.82649	1.79077	1.76672	2.0256	1.81475	1.87395	2.12486	1.77906	1.89532	1.77431	2.02747	1.74875	2.22273
ACTL10	11731898_at	5.02652	5.99294	5.97667	6.09215	6.17664	5.48462	5.86644	5.2841	6.21448	5.20963	4.9282	5.04798	4.79803	5.62399	5.09278	5.58953	6.26985	5.44792	5.9142	5.45412	4.97485	5.36375	5.53697	5.37071	5.41196	5.68803	5.03036	5.42408	5.40946	5.40835	5.61026	5.49618	5.18975	5.4165	5.00706	5.60794	4.74983	5.31574	5.14945	5.80024
ACTL6A	11720784_a_at	8.79539	6.84731	7.01097	6.65166	7.05095	8.67642	6.86647	7.27659	7.05306	7.95831	7.44319	7.52744	8.02301	7.42954	7.12703	7.28775	7.14245	7.49692	6.91865	7.82877	7.5228	7.71798	7.41377	7.44016	7.92803	7.47135	7.1951	7.78437	7.39996	7.44607	7.21917	7.95502	7.12339	7.52035	7.32273	7.3756	7.74488	7.81438	7.98193	7.23038
ACTL6B	11730967_at	2.61312	4.02131	4.17561	4.89069	4.50324	3.48507	4.39951	4.15045	3.94358	3.48964	3.64276	3.58296	3.28552	3.70436	3.92212	3.58395	4.03889	3.60122	3.6456	3.08902	3.3708	3.54522	3.82513	3.32115	3.77828	3.79075	3.83468	3.39126	3.66421	3.5516	3.77313	3.58553	3.58463	3.5857	3.52174	3.82124	3.62553	3.61134	3.22862	3.96614
ACTL7A	11730892_at	3.37634	3.9777	4.30852	4.57917	4.23553	3.97258	4.63821	3.95073	4.17428	3.58593	3.38701	3.44326	3.39943	4.08361	4.16265	3.93879	4.72335	3.77861	4.27711	4.04479	3.65256	4.13026	3.89558	3.82574	4.07499	3.93124	3.73197	3.97722	3.94955	3.73533	4.24237	4.12929	3.95707	3.96031	3.63827	3.67982	3.67562	3.80985	3.46288	4.20347
ACTL7B	11727917_at	4.74473	6.16681	5.77775	5.9457	5.74819	4.95409	5.99194	5.12561	5.8535	5.22727	5.19597	5.45116	4.88835	5.45116	5.53101	5.29688	5.78125	5.20342	5.6449	5.22421	4.77557	5.05693	5.46658	5.21221	5.31775	5.39098	5.16226	4.9648	5.50768	5.38033	5.42339	5.15381	5.25465	5.40065	4.94369	5.38981	4.55087	5.09298	5.02505	5.78664
ACTL8	11731182_at	3.76955	5.25248	4.89647	5.09978	5.09597	4.43607	5.68832	4.51804	5.13628	4.01428	4.3744	4.12045	4.4938	4.77255	4.47131	4.65226	5.00962	4.71471	4.80816	4.45256	3.96688	4.63621	4.34465	4.45104	4.47726	4.60259	4.3401	4.34614	4.6342	4.75907	4.61537	4.43833	4.34902	4.63126	4.23237	4.6215	4.25246	4.35304	4.28203	4.91427
ACTL9	11731115_at	2.72691	3.70776	3.9455	3.90665	3.81772	3.07846	3.92456	3.48447	3.3601	3.4063	3.23568	2.99152	2.93401	3.63502	3.23896	3.31974	4.0085	3.2559	3.75514	2.88096	3.35753	3.27298	3.34524	3.13946	3.53765	3.57178	3.48643	3.28067	3.1198	3.17531	3.33072	3.1801	3.48348	3.62237	2.97791	3.12704	3.16177	3.28067	2.98334	3.45362
ACTN1	11760111_at	1.61581	1.95823	1.99292	2.3767	2.58152	1.71542	1.94924	2.32276	2.12927	1.65726	1.76122	2.00772	1.5721	1.79857	2.01259	1.56793	1.91337	1.71572	2.05881	1.88502	1.68226	1.79116	1.75738	1.65665	1.83342	1.87932	2.06293	1.85874	1.83798	1.76672	1.96007	1.88587	1.53667	2.01899	1.74523	1.75561	1.48379	1.8207	1.66037	1.87677
ACTN2	11734003_at	1.89036	2.00556	2.73191	2.23683	2.19794	1.94138	1.89905	2.14013	2.40911	2.04735	1.75158	2.12619	1.98158	1.87317	2.07922	2.07098	2.29293	2.14013	2.49227	1.88642	1.79057	1.98435	1.95228	1.94253	1.89732	1.89324	2.17627	2.0287	2.12032	2.03201	1.91138	1.83486	2.07098	2.14878	1.97324	1.74581	2.05216	2.27563	1.83155	2.07351
ACTN3	11730995_a_at	2.60173	3.06691	3.1257	3.34206	2.94947	2.73591	2.99878	2.79174	2.82608	2.88618	3.28432	2.59537	2.86919	2.643	2.84518	3.128	3.16145	3.11305	3.44096	2.98361	2.71019	2.86608	2.85681	3.08957	2.86985	2.86266	2.93547	2.8585	3.03075	2.85283	3.12059	2.72734	3.01986	2.89159	2.85831	2.67897	2.66106	2.59425	2.80892	3.06535
ACTN4	11747074_x_at	5.04922	5.71931	5.65288	5.65834	5.37987	4.69904	5.72925	5.17	5.45622	5.09274	5.62209	5.46332	4.86735	5.30223	5.36448	5.5713	5.67559	5.26725	5.53757	5.21061	4.82111	5.16102	4.96252	5.40176	5.33644	5.27362	5.6931	4.89774	5.38851	5.1733	4.93473	5.2153	5.38668	4.99603	5.3705	5.23118	5.17464	5.35018	5.3071	5.70568
ACTR10	11715962_at	5.99884	4.7326	5.16137	4.38079	4.39476	4.63729	4.59094	5.47589	5.36752	5.64331	5.35714	5.45358	5.58641	5.37257	5.17044	5.82085	4.26689	5.63581	5.39779	5.78082	5.9982	5.61556	5.86707	6.02119	5.8722	5.67395	5.81108	5.75352	5.40319	5.67831	5.07054	5.68422	5.9424	5.26712	5.71991	5.92968	6.2751	5.59589	6.22353	4.70644
ACTR1A	11752821_a_at	6.26907	6.94651	6.65705	6.60947	6.58451	6.55686	7.54115	6.56864	7.23263	6.41646	6.79077	6.50896	6.30538	6.38617	6.22601	6.13791	6.35528	6.45648	6.41611	6.20312	6.43356	6.0559	6.41415	6.23883	6.77868	6.48896	6.64334	6.3404	6.50592	6.50605	6.50302	6.29164	6.1331	6.15911	5.99938	6.38796	6.41507	6.5595	6.13181	6.45056
ACTR1B	11744062_x_at	7.78764	7.65606	7.40501	7.59135	7.77118	8.0881	7.5624	7.33412	7.76289	7.71382	7.68326	7.82635	7.95474	7.67538	7.73844	7.93809	7.6399	7.82604	7.72794	7.95722	7.67509	7.91695	7.85031	7.72226	7.87277	7.70459	7.5639	7.86688	7.70551	7.85824	7.90141	7.81006	7.58328	7.74843	7.38598	7.57285	7.57556	7.67126	7.90982	7.69814
ACTR2	11762775_at	1.64769	2.00009	1.71657	1.98375	2.1427	1.55661	2.0004	2.35777	2.19301	2.12705	1.80946	1.69233	2.21044	1.97553	2.1072	1.85865	2.16892	1.8734	1.8734	1.79795	1.95025	2.0996	1.91876	2.1196	1.98662	2.35123	2.05389	2.08168	1.92462	2.08286	2.08154	2.02414	2.02177	2.27857	2.20887	1.88029	1.79442	1.9313	1.95607	1.98281
ACTR3	11751141_a_at	9.58395	8.26036	8.47382	8.25913	7.89701	8.27298	7.83189	9.23483	8.91278	9.24553	9.50453	9.12908	9.89742	9.03858	8.90087	9.01658	8.05661	9.03345	8.73628	9.23205	9.79618	8.83359	9.0063	9.41045	9.43416	9.05715	8.70663	9.43188	9.40492	9.15491	8.52187	9.1569	9.29431	8.60057	9.58074	9.2011	10.0052	9.32231	9.53688	8.32854
ACTR3B	11737056_a_at	4.62005	4.90824	4.81196	4.61356	4.87217	4.52913	4.56463	4.81355	3.89079	4.82824	4.65178	4.44239	4.70667	4.93055	4.81043	4.83613	5.01859	4.71986	5.1803	4.58084	4.41894	4.77901	4.79926	4.73231	4.91756	4.81571	4.6253	4.81811	4.70179	4.72907	4.72008	4.61505	4.7896	4.77848	4.70667	4.72762	4.59494	4.57998	4.86273	4.48728
ACTR3C	11759956_a_at	2.80397	2.82767	3.23544	2.99844	3.03377	3.40075	2.99381	3.26415	2.94683	2.9657	2.92151	2.57979	3.00579	2.954	2.99381	3.12922	3.20158	2.85064	2.99303	3.01449	3.0477	2.95424	3.5472	2.81745	3.01676	2.74582	2.97845	3.18555	2.63341	2.86295	3.13732	2.89683	2.96369	3.01724	2.8965	2.5987	3.31211	2.56044	2.89155	3.00427
ACTR5	11727934_at	6.68899	6.4962	6.35628	6.24209	6.35873	6.71004	5.78125	6.63612	6.52637	6.95212	6.54506	6.7484	6.91391	6.51126	6.82485	6.62701	6.20974	6.62673	6.54141	6.97751	6.33428	7.02624	6.64921	6.6291	6.96417	6.66839	6.58343	7.12022	6.6335	6.778	6.91777	6.92618	6.45241	6.88528	6.45805	6.59904	7.03377	6.87971	7.1236	6.74738
ACTR6	11763740_a_at	5.72722	3.96673	4.88221	4.18179	4.71397	4.80112	4.19054	4.78885	4.50417	5.41642	4.53013	4.82657	5.55529	4.69998	4.17968	4.38871	3.7089	4.51945	3.72801	4.74902	5.1659	4.43628	4.50061	4.40981	4.55468	4.07801	4.63843	4.80024	4.28203	4.27899	4.08939	4.87724	4.56511	4.62968	4.45643	4.52912	5.08683	4.69125	5.12491	4.34411
ACTR8	11742953_at	4.69756	3.37176	3.55285	3.677	3.31745	4.47509	2.96667	3.87232	3.84761	3.93252	3.37937	3.7114	3.82589	3.72578	3.84516	3.91599	3.54233	3.553	3.14991	3.90757	3.69763	3.92152	4.19742	4.11124	4.10313	3.76514	3.57147	4.27661	3.53347	4.03322	4.11534	4.18302	3.72012	3.70561	3.9148	3.83476	3.84179	4.10442	4.23783	3.92163
ACTRT1	11734450_at	3.51477	3.64674	3.36117	3.7466	3.89877	3.05933	3.63232	3.06495	3.58463	3.33291	3.22897	3.48216	3.52588	3.48919	3.62838	3.46937	3.71551	3.54783	3.73053	3.19766	3.40354	3.45803	3.62312	3.65187	3.38436	3.56268	3.39365	3.4101	3.62767	3.46144	3.49037	3.48711	3.48595	3.93545	3.42136	3.37231	3.3127	3.37807	3.52597	3.46525
ACTRT2	11730416_at	4.83796	6.17506	6.09375	6.45647	5.97896	5.48354	6.30581	5.32783	6.13786	5.22609	5.21171	5.67629	4.9948	5.62937	5.52975	5.40641	6.19948	5.54442	6.05628	5.56772	5.19034	5.37699	5.46303	5.44346	5.38426	5.54991	5.65917	5.25418	5.36336	5.47817	5.80208	5.4127	5.53896	5.47773	5.14783	5.45564	5.08373	5.388	5.04932	5.94825
ACTRT3	11730502_at	2.42326	2.62771	2.80526	2.46199	3.12263	2.90793	3.3568	2.58425	3.34135	2.50272	2.5603	2.64256	2.38233	2.76245	2.60347	2.43479	2.95602	2.43573	2.50456	2.17037	2.54489	2.59616	2.33524	2.51635	2.2903	2.48235	2.59871	2.5542	2.53297	2.39	2.21457	2.4003	2.35675	2.49556	2.45577	2.45224	2.11015	2.39597	2.67279	2.86622
ACVR1	11718647_at	4.69128	3.85095	3.0601	4.4616	3.87019	4.23562	3.96543	4.55062	3.96481	5.09034	4.83697	4.64995	5.47894	4.6795	4.63509	5.21875	4.42686	4.7831	4.64002	4.54055	4.98774	5.01354	5.02086	4.88832	4.92772	4.69849	4.17317	4.70778	4.79091	4.83232	4.69649	4.84692	4.66569	4.80995	4.49465	4.53841	5.17869	5.05973	4.9073	4.58641
ACVR1B	11738855_a_at	3.2073	3.77219	3.43412	4.05812	3.8283	3.36732	3.77919	3.10636	3.62317	3.53311	3.4138	3.59219	3.75575	3.83561	3.68948	3.66707	3.94316	4.03481	3.84652	3.55494	3.45521	3.37674	3.33033	3.65455	3.56972	3.41561	3.60869	3.34539	3.5813	3.59441	3.70729	3.53293	3.40858	3.59679	3.35939	3.67762	2.99282	3.77919	3.33639	3.5665
ACVR1C	11742016_a_at	1.98152	2.53258	2.86889	2.80039	2.57996	3.04224	2.85688	2.05881	3.07425	2.72223	3.17971	2.60926	2.5308	2.85131	2.66271	3.01121	2.7163	2.71062	2.675	2.77823	2.40799	2.80153	2.46056	2.92109	2.62302	2.64289	2.66509	2.80182	2.70639	2.50735	2.4645	2.60224	2.49098	3.01074	2.48966	2.53958	2.84514	2.44543	2.58786	2.39814
ACVR2A	11752492_a_at	2.64856	2.45149	2.55729	2.71608	2.44737	2.1983	2.51337	2.21418	2.45978	2.66932	2.71453	2.56553	2.77336	2.54131	2.38144	2.27512	3.07316	2.41431	2.28663	2.54249	2.33248	2.87855	2.52832	2.31063	2.59257	2.80194	2.39322	2.93088	2.49981	2.41856	2.68231	2.57911	2.29854	2.45648	2.17296	2.27182	2.77169	2.46368	2.59979	2.87173
ACVR2B	11727682_at	3.98367	5.11113	5.01421	4.77598	5.02719	5.1169	4.72047	4.53584	5.56903	4.60879	4.76013	5.62385	5.03915	4.97685	4.47174	5.03707	5.08623	5.056	5.21584	5.10871	5.03982	4.86396	5.09329	5.12117	4.82707	4.92868	4.60569	5.05214	4.64484	4.62259	4.96591	5.05299	4.3014	5.56235	4.6327	4.00824	4.51032	5.03346	4.94482	5.04887
ACVRL1	11747260_a_at	3.45149	3.58656	3.83044	4.08102	3.41342	3.26344	3.55234	3.39399	3.8608	3.60077	3.01187	3.29287	2.96172	3.81132	3.66119	3.63878	3.84551	3.53126	3.48936	3.45623	2.88206	3.30869	3.49686	3.37881	3.53268	3.45149	3.15105	3.36553	3.25888	3.55761	3.69582	3.31802	2.8488	3.45246	3.34929	3.44083	3.00172	3.46295	3.24205	3.48324
ACY1	11761880_at	3.988	4.34811	4.46616	4.59413	4.61102	3.84281	4.50537	4.05744	3.60666	3.74983	3.78351	3.87551	3.24572	4.21298	4.10037	4.22968	4.50417	4.24193	4.37329	4.11486	4.25156	4.21248	3.83995	3.8816	3.83683	4.01614	4.24272	4.00123	3.97294	4.0165	4.11956	3.81478	3.85161	4.30547	3.90855	4.29745	3.86357	4.01049	3.95163	4.10804
ACY3	11726235_a_at	3.89307	3.57763	3.62576	3.76671	4.0258	3.22493	3.59837	3.51539	3.61537	3.40862	3.39907	3.19484	3.07319	3.49663	3.51074	3.36754	4.10313	3.17976	3.74366	3.15869	3.59364	3.33729	3.45484	3.15068	3.20843	3.2244	3.38533	3.1547	3.45546	3.38445	3.35117	3.39318	3.25908	3.46682	3.32185	3.21053	3.16346	3.23381	3.04975	3.54856
ACYP1	11728974_a_at	6.2499	4.90836	4.80166	4.90473	5.07074	5.74972	4.41735	5.57211	5.30015	5.38903	5.34438	5.92446	6.42738	4.91892	4.77006	5.23175	4.9315	5.02726	5.10578	5.85736	5.63072	5.69354	4.74283	5.10376	5.51846	4.99005	4.74851	5.59219	5.25453	5.09465	4.64917	5.70136	4.69586	5.50961	5.23985	5.21662	5.51942	5.3275	5.97341	5.00472
ACYP2	11735240_a_at	4.95188	2.39995	2.97283	2.38715	2.99576	3.50728	2.25934	2.6743	3.17381	4.09761	3.23113	4.07321	4.59603	3.42064	3.06215	3.10471	2.79619	3.24788	2.71779	3.62193	3.41571	3.33316	3.68357	3.33193	3.60499	3.46662	3.47317	2.9868	3.33477	3.69715	3.33646	3.42293	3.68267	3.11902	3.37286	3.36554	3.59188	3.92048	3.74197	2.94867
ADA	11758337_s_at	9.2366	7.36343	7.15947	7.38968	6.90563	8.8835	6.76397	8.34164	7.4567	7.60174	7.17964	8.08734	7.86992	7.38084	7.5534	7.37428	7.29137	7.65574	7.0401	7.8007	7.44124	7.67547	7.17883	7.17227	8.92285	7.41485	7.27043	7.94658	7.78209	7.12449	8.08149	8.24041	6.64461	7.79657	7.27968	8.08578	7.8125	8.26137	8.28759	7.85866
ADAD1	11727119_a_at	2.03527	2.67983	2.79274	2.55117	2.92934	2.81869	2.34071	2.51777	2.49256	2.30498	2.40093	2.52821	2.22586	2.87485	2.69123	2.65668	3.32375	2.44583	2.6066	2.37085	2.83379	2.40093	2.31841	2.45143	2.38651	2.58985	2.55704	2.71651	2.56734	2.60344	2.63034	2.56739	2.52913	2.54837	2.40891	2.55729	1.99545	2.38083	2.21915	2.83455
ADAD2	11729005_a_at	5.51092	6.46222	6.34615	6.73224	6.49377	6.02153	6.59377	5.66684	6.05669	5.85047	5.12641	5.32141	5.10338	6.05577	5.85898	6.11263	6.46095	5.98285	6.37772	5.76246	4.92718	5.89255	6.05519	5.65668	5.76863	5.84105	6.06738	5.83279	5.68528	5.87244	6.02569	5.71962	6.02156	6.15143	5.54649	5.86441	5.30407	5.79562	5.35632	6.3853
ADAL	11732004_a_at	3.47848	1.79988	2.24214	1.75852	2.12148	2.58861	1.91125	2.03367	1.8927	2.3665	1.89901	2.70634	2.63304	1.82437	2.24188	1.95018	2.11647	2.45753	2.03724	2.67174	2.13747	2.04802	2.32338	1.91933	2.20388	2.24768	2.03775	2.36765	2.02312	1.97008	2.26274	2.11705	2.1356	1.94461	2.51681	2.12378	2.35904	2.51897	2.3798	1.99931
ADAM10	11736027_a_at	6.9507	5.58411	5.72781	4.75486	4.42303	6.57735	4.74219	6.11994	4.85734	6.39302	6.0513	6.18285	6.80388	5.93323	5.9087	5.80108	4.90839	6.01872	6.05541	6.36592	7.26376	6.09479	6.17833	6.50613	6.19419	6.21534	6.2589	6.59461	6.66989	6.32476	5.43064	6.11181	6.75383	5.92771	6.54666	6.2869	7.02922	6.6234	6.02193	5.24974
ADAM11	11731820_at	3.13551	3.76085	3.63534	3.58404	3.70259	3.05273	4.03871	3.43338	3.45005	3.16454	3.41164	3.26351	2.9742	3.31015	3.42025	3.42027	3.51781	3.36795	3.84014	3.31094	3.07527	3.15328	3.13979	3.41493	3.13501	3.40208	3.54086	3.49902	3.3483	3.35935	3.41026	3.38815	3.37667	3.4303	3.48861	3.52035	3.19892	3.17635	3.12149	3.67188
ADAM12	11747432_a_at	2.10041	2.88734	2.93475	2.91877	3.29227	2.67124	3.35921	2.16818	2.55754	2.22996	1.84818	2.5355	2.34387	2.40137	2.53444	2.81254	2.98973	2.62721	2.85903	2.62155	2.13224	2.79905	2.61457	2.4416	2.61477	2.64707	2.74196	2.68029	2.49367	2.55526	2.64365	2.68174	2.54385	2.51337	2.35302	2.41528	2.25477	2.91877	2.32896	2.68733
ADAM15	11760450_x_at	4.85096	5.59541	5.1852	5.39004	5.5765	4.62698	5.59183	4.23275	5.09188	4.90326	4.78027	4.3931	4.83417	5.10475	5.00824	5.11419	5.41598	5.02256	5.13068	4.83796	4.14977	5.15166	5.05965	5.15933	5.06765	4.96914	4.97456	4.62664	4.92484	5.23081	5.02523	4.94821	5.02055	4.76524	4.78663	5.08791	4.97483	4.9598	4.61949	4.90682
ADAM17	11762039_at	2.21244	2.16525	2.3576	2.24256	2.40665	2.47198	2.09237	2.1376	2.5397	2.44485	2.30928	2.15063	2.22812	1.8717	2.57308	1.97891	2.3991	2.17738	2.22003	2.2864	1.9849	2.25906	2.20461	2.13887	2.59623	2.4274	2.43488	2.03865	2.19496	2.10994	2.09522	2.20931	2.51121	2.28587	2.3079	1.92707	2.16402	2.3246	2.22003	2.09709
ADAM18	11746131_a_at	2.19025	2.13319	2.48129	2.06343	2.16338	2.10476	2.1475	2.52673	2.43185	2.15081	2.04883	2.0627	2.20649	2.20843	2.10416	1.9745	2.1834	2.36649	2.36487	2.29653	2.05057	2.03914	2.32466	2.18499	2.03479	2.26238	2.18499	2.19311	2.10981	2.01998	2.22703	2.13319	2.10158	2.18736	2.19845	2.20557	2.24692	2.0706	2.1464	2.05858
ADAM19	11723189_a_at	2.68359	4.23651	4.13814	3.3376	3.42319	3.24964	4.05874	3.35391	3.40812	3.37728	3.41375	3.37534	3.23232	3.44682	3.40615	3.32523	3.61705	3.17752	3.54858	3.47422	2.95846	3.08628	3.53205	3.27347	3.22075	3.49634	3.42224	3.077	3.26455	3.11518	3.25093	3.44033	3.18486	3.23865	3.23232	3.31583	2.93721	3.4869	2.9052	3.37438
ADAM2	11746987_a_at	1.82561	2.02556	1.90451	2.44209	2.04396	1.87269	1.8548	1.74319	2.3134	1.69941	1.90334	2.10573	1.96695	1.82628	1.94797	1.88999	2.45788	1.93474	1.97367	1.91362	1.99241	1.83769	1.91803	1.94522	2.13091	2.07155	1.98724	1.67688	1.96432	1.94141	1.91923	1.70755	1.74319	1.91439	1.94244	2.01958	1.65949	2.05454	1.82441	2.25367
ADAM20	11734255_at	2.67279	3.30023	2.92003	3.20592	3.3635	2.9307	3.52278	2.75132	2.90078	2.92728	2.90693	3.04074	2.86313	3.11311	2.97914	2.97101	3.05733	3.01226	3.0067	2.97123	2.82445	3.18791	2.47288	2.97393	3.04038	3.02083	2.9775	2.78336	2.87764	3.03525	3.02671	2.89967	2.773	2.80555	2.76148	3.18001	3.0132	2.79014	2.74366	3.11141
ADAM21	11740740_at	2.69604	2.95218	2.86537	3.17205	3.30268	2.90736	2.90824	2.79092	3.23917	2.54255	2.88465	2.90424	2.85053	2.86664	2.91925	2.81361	2.92241	2.99614	2.93575	2.81958	2.83392	3.00461	2.90609	2.73524	2.928	3.31961	2.79905	2.94419	2.80661	2.94446	3.01388	2.69222	2.79348	3.08397	2.91468	2.89967	2.78884	2.85965	2.79308	2.90243
ADAM22	11759927_at	1.88779	2.47063	2.05881	1.93026	1.99415	1.89407	2.24215	1.92319	1.86379	1.86578	1.95749	2.00681	2.02484	2.07412	2.15469	2.21662	2.42588	1.92905	2.0626	1.81727	1.80278	2.02975	1.83539	2.04118	1.88822	2.01457	2.20426	2.03559	2.08374	1.95554	2.15469	1.85356	2.22352	2.34635	2.01833	1.87136	2.02894	1.95391	1.93075	2.22971
ADAM23	11736770_a_at	2.89879	3.12161	2.91925	3.40311	3.51995	3.08352	4.1907	2.72083	3.66806	2.67579	2.93996	3.00303	3.10591	2.95303	2.80911	3.11508	3.64326	3.08072	3.198	3.03774	2.91197	2.94618	3.09366	2.98959	3.17941	3.38714	2.53724	3.26213	2.98986	2.92063	3.03774	3.15586	2.67654	3.34193	3.14324	2.60435	2.82472	2.8762	2.93996	3.08636
ADAM28	11740890_a_at	2.68359	2.99074	3.07681	3.35131	3.88938	3.44607	3.52386	3.16293	3.42661	3.40046	3.44805	3.60707	3.54673	3.50455	3.22853	3.86977	3.66847	3.65242	3.16737	3.25064	3.54962	3.59994	3.12924	3.29533	2.73437	3.65313	3.17377	3.62905	3.53861	3.82616	3.0214	2.90882	3.40115	3.57724	3.69715	3.43941	3.65597	3.32901	3.75579	3.83414
ADAM29	11736525_a_at	2.90297	3.95899	3.4206	3.64232	3.69968	3.38669	4.15519	3.21908	3.47176	2.95578	3.12761	2.87755	2.73437	3.30718	3.16729	3.3149	3.47268	3.33941	3.6626	3.18665	3.04546	3.20263	3.21333	3.26902	3.17115	3.67942	3.1522	3.38863	3.21107	3.26516	3.53334	2.9847	3.14451	3.59905	3.04797	3.27788	2.92926	3.26756	3.1252	3.37022
ADAM30	11734058_at	2.6339	3.21972	3.50681	3.03824	2.9562	2.92348	3.78464	2.88096	3.41701	2.82252	2.72839	2.3339	2.24057	2.77759	2.92919	2.80995	3.1593	2.86665	2.94715	2.49078	2.27841	2.52452	2.68491	2.78001	2.54973	2.87569	3.12099	2.64537	2.61633	2.86508	2.85567	2.72452	2.82155	2.71534	2.71623	2.8832	2.82314	2.76314	2.53747	2.79424
ADAM32	11728387_a_at	2.27964	2.47198	2.89307	3.05652	3.22695	2.57732	2.8469	2.70163	2.72389	2.44662	2.79576	2.68447	2.52743	2.91627	2.55404	2.77454	2.70348	2.72039	2.87836	2.69535	2.46018	2.86004	2.42738	2.84766	2.64576	2.59648	2.6787	2.65788	2.73042	2.56237	2.63069	2.54245	2.64386	2.86795	2.63563	2.62447	2.55178	2.74594	2.41956	2.68738
ADAM33	11734964_x_at	3.61897	4.22141	3.69013	4.09097	4.45504	3.49815	3.93952	3.24869	3.87818	3.98037	3.31932	3.47018	3.69243	3.66545	3.8697	3.72433	4.10313	3.38259	3.91465	3.94047	3.63844	3.57585	3.61544	3.61178	3.59714	4.02456	3.73442	3.4556	3.72587	3.83987	3.78074	3.50085	3.60088	3.44861	3.5304	3.55925	3.61657	3.63056	3.49411	3.67896
ADAM7	11762139_at	2.30024	2.72507	2.39963	2.89098	2.52155	1.65947	3.20229	3.39064	3.25678	2.30363	2.51084	2.86903	2.34323	2.67709	2.73953	2.61717	3.54219	2.78604	2.89453	2.71288	2.66099	2.84882	2.56087	3.02355	2.62006	2.69046	2.8918	2.65428	2.55276	2.71594	2.55056	2.70133	2.80882	2.37592	2.56343	2.47648	2.46523	2.51831	2.54469	2.7814
ADAM8	11748684_a_at	3.84859	5.04552	4.67693	4.68644	4.80075	3.98924	5.11058	4.62334	4.69429	4.38268	3.78927	4.30003	4.16109	4.42279	4.14019	3.99581	4.6045	4.27409	4.47688	4.19012	3.53941	4.18733	4.1147	4.30557	4.1123	4.28489	4.34484	3.97976	4.24553	4.44638	4.40604	4.11742	3.99296	4.55017	3.92518	4.37873	3.81544	3.98671	4.37183	4.55809
ADAM9	11741960_a_at	4.97439	5.10017	5.19425	5.47653	4.61036	4.54776	4.46936	5.25215	4.85985	5.38887	5.25025	4.30247	4.59869	4.91629	4.86197	4.36778	4.74467	4.92958	4.95157	4.85593	5.61716	4.95814	4.90948	4.80254	4.8885	4.87969	4.98374	4.45388	4.89568	4.74997	4.74709	4.81629	6.12762	4.89172	5.26684	5.23984	5.13876	5.40257	4.52418	4.67776
ADAMDEC1	11729110_s_at	1.8949	2.12082	1.88151	1.99197	2.03933	1.83239	2.08755	2.25123	1.84852	1.70609	2.10344	2.0359	2.56955	2.27225	1.85277	2.05478	2.23382	2.04803	2.06689	2.00013	2.13002	1.88749	2.4348	1.76322	2.05881	1.7547	2.43491	2.08925	1.87143	1.66464	2.1321	2.05197	2.22809	1.88082	1.84232	2.14658	2.2109	2.25215	2.13202	2.17678
ADAMTS1	11732158_a_at	3.40189	3.46191	3.31291	3.9194	3.94409	3.32354	4.03436	3.53192	3.35087	2.82635	3.17082	2.87105	2.95168	3.28819	3.51258	3.23196	3.51069	3.1067	3.51797	3.40068	3.34943	3.41782	3.00094	3.16872	3.32009	3.05842	3.50526	2.98534	3.45923	3.19293	3.16423	3.28661	3.28001	3.29305	2.99642	3.24611	3.19256	3.19897	2.92588	3.26654
ADAMTS10	11727551_a_at	3.32605	4.56039	4.06372	4.36009	4.52827	4.03275	4.92348	3.84078	4.6189	3.77087	3.9178	3.51906	3.35818	3.89775	3.95202	3.65501	4.66965	4.10022	3.64303	3.74223	3.91574	3.76617	3.86815	3.61469	3.66892	3.92441	3.66996	3.79204	3.92185	3.95553	3.67332	3.82229	3.67819	3.45916	3.4081	3.87047	3.41207	3.67381	3.39839	4.10145
ADAMTS12	11744664_a_at	3.33193	3.28616	3.71073	3.76174	3.93565	3.1841	4.02968	3.29175	3.16666	3.51043	3.54588	2.80745	2.82971	3.2606	3.3228	3.10432	3.99288	3.41207	3.40708	3.39391	2.79582	2.99204	3.16054	3.30091	3.1272	3.39487	3.25392	3.06277	3.30956	3.15415	3.45575	3.27389	3.35939	3.11016	2.99793	2.99793	3.13428	3.2688	3.12358	3.72202
ADAMTS13	11728139_a_at	3.26611	3.27285	3.10431	3.41561	3.70451	3.53463	3.62075	3.0969	3.43572	3.42701	3.10046	3.63511	3.34655	3.22722	3.48873	3.60267	3.73883	3.13544	3.45356	3.50042	3.74047	3.28223	3.3229	3.18817	3.04004	3.42644	3.44023	3.2052	3.29115	3.3489	3.24258	3.25117	3.07738	3.34345	3.25913	3.25213	3.15605	3.27094	3.60267	3.23015
ADAMTS14	11726953_at	3.63289	4.25973	3.8389	4.71917	4.16755	3.70056	4.75093	3.99103	4.50707	3.5209	3.75806	3.19003	3.49169	4.06503	4.05909	3.92878	4.62286	3.83439	4.09809	3.92897	3.61007	3.71541	3.59915	3.72574	3.9494	4.19456	4.19183	3.85133	3.89665	3.93338	4.13624	3.80649	3.73804	4.17267	3.64385	4.14034	3.61341	4.11939	3.52446	4.35561
ADAMTS15	11759477_at	4.73866	5.86741	6.13231	5.79902	6.34483	5.12506	6.02447	5.05915	5.24151	5.29061	4.64291	5.4976	4.48797	5.29823	5.2453	5.32036	5.84961	5.30829	5.63754	5.20077	5.05109	5.06618	5.49901	4.99314	5.06949	5.37644	5.21395	5.05214	5.00929	5.4956	5.36338	5.29327	4.83489	5.28563	4.81704	5.46597	4.97745	5.12435	4.79106	5.51408
ADAMTS16	11760764_at	2.37163	2.25205	2.20429	2.1027	2.73937	2.15225	2.60905	2.5892	2.81258	2.12762	2.47073	2.63462	2.45351	2.45452	2.5783	2.12762	2.57179	2.38171	2.71921	2.70099	2.88372	2.21255	2.5935	2.43816	2.2633	2.31001	2.36758	2.5713	2.44987	2.30274	2.08154	2.45502	2.64057	2.30023	2.49558	2.24664	2.24591	2.03537	2.08695	2.22426
ADAMTS17	11734291_at	2.72776	3.6694	3.58463	3.68453	3.6694	4.253	3.00579	3.67408	3.60208	3.10679	2.65493	3.0969	3.20035	3.33871	3.0816	3.88027	3.43036	3.45613	3.61831	3.2955	3.29479	3.58982	3.6015	3.30063	3.12326	3.26367	3.28728	3.32383	3.42664	3.41146	3.18562	3.52825	3.29401	3.77202	3.27502	3.38748	3.03754	3.52358	3.48884	3.11141
ADAMTS18	11754754_s_at	1.88455	2.68045	2.10344	2.61626	3.11182	4.58449	2.35146	2.15104	2.09679	2.2857	2.27909	2.34996	2.16437	2.22349	2.40735	2.31227	2.21805	2.43394	2.64839	2.19484	2.33764	2.11536	2.22012	2.27065	2.32972	2.37255	2.24188	2.29084	2.09065	2.26073	2.48351	2.24725	2.19042	2.33871	2.05463	2.13805	1.97157	2.2773	2.12454	2.42772
ADAMTS19	11734113_a_at	1.80719	1.69809	2.06996	1.90148	1.83116	1.74853	2.15308	1.9267	1.97224	1.94277	1.85219	1.9267	1.70507	1.86861	1.66838	1.96429	2.09303	1.96521	1.71617	1.92189	1.71479	1.975	1.92209	1.77031	1.74853	1.92782	1.97044	1.78662	1.74458	1.8376	1.78829	1.77083	1.87161	1.90996	1.80082	1.8901	1.90135	1.89022	1.60879	2.16836
ADAMTS2	11730504_at	4.1945	5.33765	4.68797	5.06114	4.89298	4.60258	4.99059	4.74967	4.96604	4.7847	4.62367	4.48521	4.29057	4.52936	4.64091	4.42879	4.53988	4.67365	4.92536	4.44188	4.38863	4.35017	4.6066	4.56421	4.50755	4.78998	4.91848	4.48537	4.45201	4.62857	4.76511	4.57794	4.63779	4.61771	4.67348	4.58146	4.58494	4.6052	4.3355	5.21146
ADAMTS20	11755779_a_at	2.07356	2.10239	2.40131	2.35086	2.26326	2.03504	2.36886	2.48065	2.08374	1.86268	2.17197	1.93004	1.9052	1.86972	2.01974	2.16116	2.11273	1.92633	2.25954	1.84287	1.73346	2.04223	1.95571	2.05885	1.92399	2.271	2.1524	2.13806	2.04504	2.01508	2.3369	2.01006	2.29943	1.99941	1.90447	2.15392	2.0143	1.92122	2.14407	2.05353
ADAMTS3	11731358_at	1.78049	2.00031	1.88429	1.94293	1.84586	1.93911	1.8506	2.00904	2.37267	1.89131	1.74315	2.50171	2.02016	1.86082	2.15154	2.01993	1.87451	2.09457	1.90311	1.84859	2.17366	1.83089	1.84882	1.90028	2.01635	1.99041	1.90627	1.9056	1.8273	1.88276	1.94529	1.93848	1.91	1.69429	1.9328	1.96905	1.79397	2.03537	1.79903	1.91568
ADAMTS4	11752079_x_at	2.92712	4.19801	3.46425	3.78185	3.87467	4.03545	3.87008	2.96262	3.66123	3.50679	3.11044	3.15261	2.94084	3.46443	3.07005	3.43609	3.89044	3.3438	3.55368	3.19763	2.80848	3.31097	3.63185	3.34585	3.34481	3.67001	3.29197	3.08037	3.34365	3.54429	3.91193	3.2737	3.33034	3.22191	3.1876	3.39566	2.8744	3.47079	3.15124	3.31994
ADAMTS5	11726855_at	2.89034	3.21364	3.00907	3.24263	4.00775	2.71857	2.99315	2.64148	3.32594	3.33787	2.8095	3.33193	3.55561	3.60265	3.23349	3.03248	3.37035	3.34853	3.45974	3.37753	2.95424	3.17362	3.14348	4.45175	3.14614	3.64304	3.3113	3.30275	3.40045	4.28009	3.40285	3.26121	4.12223	3.28135	3.71712	2.99234	3.0205	3.49033	2.89967	2.80826
ADAMTS6	11752137_a_at	3.00202	3.14556	3.18338	3.03084	3.09466	2.91342	3.33354	2.67066	3.25592	3.0689	3.11584	2.8098	3.04966	2.76028	2.99405	3.22581	2.99613	3.02089	2.95138	2.57238	2.78853	3.03893	2.81671	3.14319	2.99613	3.002	2.74684	2.78306	2.82164	2.95106	2.8404	3.00382	3.1717	2.57585	2.98944	2.99877	2.78029	2.95927	2.98118	3.25707
ADAMTS7	11760813_a_at	3.2653	4.28788	3.79838	4.03895	3.92014	3.61812	4.41962	4.10635	3.48959	3.71271	3.27941	3.45356	3.353	3.5054	3.58748	3.25845	4.11447	3.82394	4.02697	3.69192	3.60886	3.55211	3.65985	3.23882	3.2653	4.07628	3.70505	3.5538	3.83141	3.8385	3.80875	3.70868	3.73107	3.56225	3.20236	3.44083	3.14676	3.60276	3.50039	3.72786
ADAMTS8	11731704_a_at	2.57788	3.43837	3.32802	3.75302	3.49217	2.8089	3.39896	2.96262	3.14051	2.93784	2.48633	2.84053	2.56871	3.09402	3.23352	2.95718	3.16765	2.63462	3.34692	2.93994	2.48086	2.95979	3.08686	3.18603	2.83164	2.96118	2.95846	2.54573	2.75002	2.86913	2.72582	2.92862	2.87422	3.22073	2.65592	3.35391	2.7573	2.76668	2.7941	3.11658
ADAMTS9	11745589_a_at	2.8031	2.91243	3.06804	3.47497	3.11076	2.87965	2.86173	3.08369	2.92097	3.03866	2.26844	3.25405	2.73437	2.95495	2.68842	2.9513	3.05929	2.87701	3.10014	2.71288	2.76028	2.99811	2.95494	2.71107	2.69483	2.81676	2.71989	2.66609	2.62397	2.77179	2.83257	2.80811	2.78805	2.92876	2.65139	2.81564	2.59018	2.74562	2.36819	3.09935
ADAMTSL1	11757548_s_at	2.25539	2.62169	2.887	2.55117	2.56043	2.40201	2.88312	2.44626	2.40349	2.4157	2.21476	2.3312	1.96643	2.52175	2.45086	2.64614	3.36096	2.44059	2.58414	2.63024	2.25348	2.5318	2.45224	2.42656	2.35013	2.46759	2.53949	2.38227	2.33681	2.39471	2.61245	2.3317	2.29161	2.73935	2.40855	2.22556	2.25348	2.29216	2.38757	2.83118
ADAMTSL2	11730124_s_at	4.99499	6.2606	5.9863	6.23653	6.27551	5.44792	6.49657	5.43695	5.92865	5.3832	5.31297	5.31103	5.30385	5.6799	5.45862	5.52822	6.17818	5.71962	6.18422	5.27535	5.18176	5.55684	5.60088	5.47089	5.50573	5.54991	5.61408	5.39649	5.54803	5.6041	5.8624	5.47297	5.53594	5.57836	5.29634	5.63155	5.10981	5.49643	5.28209	5.91156
ADAMTSL3	11728117_a_at	2.61053	2.84614	3.08309	3.63218	3.3908	2.67686	2.98158	2.97865	3.00124	2.76691	2.80837	2.31452	2.37248	2.95215	3.04546	2.72882	3.24739	2.8787	2.96198	2.68219	2.8804	2.47071	2.55818	2.80522	2.81689	2.85868	3.09226	2.7569	2.86089	2.86087	2.95189	2.91033	2.91352	2.81935	2.66545	2.79326	2.74199	2.70635	2.8994	3.09966
ADAMTSL4	11755688_a_at	3.70338	4.32891	4.13512	4.14262	3.89689	3.40767	4.1907	4.17891	3.73748	3.91704	4.36601	4.13889	4.21657	3.91738	4.26272	4.17686	4.13584	4.18159	4.29117	3.87685	4.12603	4.03942	4.01843	4.02343	3.97349	4.13232	4.37557	3.99425	4.03977	4.06303	4.33958	4.20498	4.36824	3.99115	3.79627	4.08265	4.06628	3.98777	3.73646	4.12562
ADAMTSL5	11740543_at	3.19108	4.64524	3.94327	4.60954	4.51338	4.17454	4.59323	3.77789	3.68989	3.71843	3.63515	3.88164	3.71902	4.05019	4.06852	4.27641	4.51894	3.9732	4.10313	3.71653	3.40851	4.17153	4.00823	3.67882	3.89968	4.01195	3.93294	3.81347	4.04107	3.75914	3.98004	4.03167	3.96471	4.33385	3.69715	3.78721	3.52207	3.71824	3.829	4.31332
ADAP1	11751433_x_at	3.87186	4.53502	4.83989	4.42407	4.64067	4.30833	5.05041	4.55964	4.3657	4.71332	4.03741	4.08164	3.56675	4.32284	4.19881	4.35452	4.47912	4.0213	4.51322	4.18842	3.31083	4.48464	4.14865	4.11467	4.06365	4.37899	4.42777	3.99926	4.22153	4.14227	4.43307	4.00815	4.28353	4.53543	3.89081	4.33057	3.84699	4.19801	4.2332	4.60168
ADAP2	11725175_x_at	4.68708	5.37772	5.46866	5.52978	5.78306	4.44692	4.59941	5.98222	5.65489	6.94034	6.28026	6.08155	6.21373	5.92562	6.16376	5.2701	5.49248	5.52123	5.80162	5.5214	6.22183	5.80232	6.06441	6.0922	6.26993	5.48124	5.99301	5.46886	5.73565	5.98089	6.26646	6.15718	6.38971	5.89881	5.76337	6.85472	6.51919	6.39548	5.60867	6.0994
ADAR	11739021_a_at	3.20857	3.00125	3.61003	3.82829	2.6197	3.21529	3.09584	3.48422	2.52971	2.92046	3.949	3.1068	3.31543	3.5767	3.76922	3.68339	2.75101	3.9469	3.74823	3.39074	3.09653	3.56281	4.04291	3.21833	3.49316	3.58514	3.12648	3.71205	3.17589	3.01232	3.50854	3.28661	3.68474	3.51654	3.9152	3.31214	3.79895	3.42157	3.42477	3.31215
ADARB1	11751915_a_at	3.64381	4.60499	4.45326	4.61284	4.83554	4.15546	5.00371	4.20122	4.57498	3.94666	3.86944	4.06721	3.8057	4.32555	4.3305	4.32336	4.53785	4.31195	4.3444	4.27907	3.75953	4.26757	3.9358	3.96308	3.72486	4.32497	4.11522	4.06379	3.94077	4.09931	4.2805	4.07199	4.30333	4.25256	3.70977	4.18018	4.01967	4.15313	4.29648	4.53921
ADARB2	11737459_a_at	2.34718	2.97838	2.91104	2.9196	3.15781	2.75273	3.53706	3.03223	3.33659	2.2827	3.00794	2.84992	2.7466	2.65688	2.78526	2.73232	3.10498	2.87644	3.05193	2.81481	3.08448	2.98861	2.78241	2.73744	2.79219	2.70671	3.05777	2.53455	2.73038	2.72547	2.93259	2.79279	2.6917	2.92509	2.83511	2.86571	2.54282	2.7135	2.71519	2.85731
ADAT1	11751112_a_at	5.03737	5.42213	5.31906	5.23789	5.76484	5.60201	5.27083	5.226	4.97968	5.42592	5.14627	5.21857	4.96577	5.44741	5.54853	5.38687	5.1599	5.54749	5.33014	5.54528	5.02636	5.33723	5.25226	5.0886	5.55404	5.48556	5.78637	5.31561	5.36037	5.25302	5.40818	5.15685	5.25762	5.16431	5.57628	5.19785	5.55226	5.76343	5.4303	5.33869
ADAT2	11748593_a_at	2.96982	3.12483	3.07318	3.22573	3.48191	3.46425	3.39244	2.82626	3.08202	3.20471	3.0044	2.9343	2.99498	3.24778	3.09991	3.30379	3.30568	3.18115	3.13067	3.05941	2.98357	3.05541	3.1306	2.87199	3.04739	3.14721	3.06795	2.92349	3.1839	2.97153	3.17149	3.19972	3.03263	3.08826	3.05548	3.14299	2.83036	3.06776	2.9833	3.01618
ADAT3	11744023_at	5.87406	6.38562	6.45834	6.28129	6.55374	6.29384	6.58426	6.11925	6.20177	6.07694	5.85302	6.02716	5.48993	6.0854	6.10673	6.32852	6.40314	6.2188	6.30917	6.16668	5.42306	6.24565	6.22971	6.03969	6.13685	6.10676	5.96945	6.03061	6.02613	6.12069	6.37337	6.00944	6.07232	6.11286	5.90076	6.09197	5.62409	5.95428	5.84917	6.36388
ADCK1	11750226_a_at	4.078	4.80494	4.73233	4.37125	4.58558	4.12323	4.713	4.72372	4.50107	4.1403	4.79892	4.14793	4.30306	4.56857	4.38218	4.56425	4.45987	4.32915	4.33276	4.26676	4.24315	4.54115	4.51039	4.39895	4.39022	4.27517	4.42472	4.40329	4.27227	4.48713	4.25596	4.59667	4.43696	4.29843	4.25054	4.36697	4.17769	4.17331	4.33276	4.69916
ADCK2	11745039_a_at	3.9501	3.3908	3.81633	3.47527	3.65004	4.48827	3.79207	3.78965	3.82072	3.87272	4.10145	4.11438	4.55102	4.00377	3.89812	4.0171	3.65557	3.74047	3.74122	4.35321	2.9982	3.77013	4.1701	4.17439	4.44692	3.83672	4.29105	4.21298	3.76556	4.08899	4.21581	4.05216	3.5027	3.67659	4.25943	4.24234	4.39734	3.94995	4.20481	3.61093
ADCK5	11728448_a_at	4.01676	5.41129	4.68968	4.76856	5.06262	4.43911	5.10003	4.33222	4.73957	4.47114	4.54637	4.59574	4.40614	4.75725	4.58445	4.34614	5.03209	4.73235	4.75449	4.44692	4.11028	4.64167	4.15243	4.13511	4.55546	4.66743	4.48047	4.37357	4.60667	4.59524	4.87167	4.52126	4.48125	4.59475	4.20723	4.70895	4.58999	4.58139	4.24384	4.82775
ADCY1	11722266_at	2.94903	3.5146	3.33256	3.57482	3.2223	2.9307	3.46661	3.35391	3.75825	3.28149	3.08861	3.06908	3.16426	3.42633	3.36797	3.56244	3.39097	3.26943	3.50607	3.34436	3.2033	3.25739	2.98058	3.08363	3.36308	3.27977	3.28042	3.33782	3.28328	3.12712	3.76106	3.38356	3.19948	3.21415	3.14827	3.45775	3.4042	3.30994	3.10655	3.58017
ADCY10	11747226_a_at	2.76884	3.75984	3.15558	3.94963	3.57382	3.28243	3.6149	2.72239	3.17675	3.22368	3.12095	2.99155	2.88133	3.24162	3.10582	3.38978	3.59156	3.23942	3.26055	2.99475	3.14783	3.25083	3.21107	2.9257	2.95683	3.0501	3.34018	3.24757	3.11902	3.22615	3.14077	3.23335	3.57368	3.45257	3.46576	3.09326	3.11094	3.18263	2.89786	3.45421
ADCY2	11720995_at	2.10594	2.48246	2.49133	2.2136	2.2748	2.16684	3.0234	2.59543	2.14744	2.36465	2.0752	2.35477	2.53943	2.40207	2.46101	2.45889	2.27603	2.30933	2.67876	2.39988	2.36696	2.3798	2.25015	2.41007	2.5363	2.01524	2.33365	2.49823	2.8054	2.41207	2.56571	2.37191	2.40181	2.21471	2.35552	2.29091	2.4696	2.50175	2.21305	2.39078
ADCY3	11716872_a_at	7.7258	7.54338	6.88922	6.88922	6.70783	6.98891	6.93156	7.04151	6.67976	6.5499	6.98094	6.70441	6.81588	6.66491	6.73633	6.92296	6.72862	6.76959	6.61402	6.79886	6.72617	6.81871	6.55658	6.74856	6.89782	6.67816	6.44259	6.76525	6.65313	6.7703	6.92814	6.79544	6.97267	6.84351	6.48805	6.94743	7.35527	6.92084	6.77893	6.86691
ADCY4	11755003_a_at	5.40663	4.91953	5.03265	4.89586	4.66141	3.90286	4.58197	5.05303	4.17614	4.36095	4.86213	4.66085	4.43119	4.7715	5.18899	5.21416	4.48423	4.70034	5.0562	4.45756	5.72968	4.65295	4.85497	5.04801	4.60688	4.63447	5.38041	4.74017	5.09824	4.69098	4.73154	4.73944	5.84452	5.09195	5.34724	5.19023	5.11321	4.87343	4.92307	5.21507
ADCY5	11740037_a_at	3.22945	4.55329	4.22639	4.55526	4.1512	3.84314	4.62264	3.57073	4.39393	3.62945	3.52785	3.27829	3.14272	3.63517	3.52872	3.53008	4.20787	3.45548	3.78483	3.58214	3.49002	3.79524	3.82166	3.54673	3.72533	3.84721	3.63097	3.57815	3.68417	3.62226	4.26487	3.42376	3.65995	3.81645	3.49192	3.8645	3.64094	3.77152	3.34225	3.66721
ADCY6	11761681_a_at	2.33575	2.41011	2.83654	2.44209	2.58725	2.31934	2.92195	2.54987	3.0445	2.22144	2.53167	2.56439	2.36318	2.76028	2.91925	2.75221	2.82255	2.32658	2.36859	2.05263	2.18507	2.23082	2.56843	2.30243	2.24006	2.68151	2.53724	2.38068	2.43349	2.6833	2.58648	2.22386	2.14407	2.86844	2.27754	2.6001	2.24119	2.27405	2.25676	2.63344
ADCY7	11755534_a_at	6.02058	6.074	6.0849	6.12225	5.94244	5.83819	6.24474	6.29943	5.96621	5.86469	5.95544	5.78883	5.84485	5.92303	6.14118	6.14864	6.15767	6.02426	6.26121	6.02219	5.57802	6.08313	6.17732	6.23411	5.89488	6.0344	6.09088	5.85622	5.974	6.06881	6.30295	6.13691	6.1005	6.04228	5.75978	6.02271	5.80523	5.81779	5.97295	6.23233
ADCY8	11733501_a_at	3.18696	3.06754	3.02994	3.18622	3.40663	2.65321	3.39177	3.0872	2.95848	3.06897	2.98072	3.14768	3.07399	2.98528	3.26201	3.09594	2.98156	2.75009	2.91436	2.59798	2.88351	2.87033	3.02602	2.95162	2.99702	3.10974	3.15541	2.93526	2.86931	3.23283	2.84785	3.1635	3.23888	2.80818	3.02941	2.80073	3.00765	2.74684	2.97772	3.0779
ADCY9	11758076_s_at	3.62665	4.92236	4.48721	4.51719	4.78643	4.10396	4.5043	4.35187	4.46711	4.12307	4.0001	4.0546	3.57069	4.24341	4.12383	4.40132	4.54539	4.03345	4.66856	4.08923	4.30164	4.40756	4.57339	4.21502	4.14085	4.23971	4.49304	4.31173	4.46633	4.13811	4.3427	3.97582	4.2166	4.40193	3.76945	4.38197	3.47546	4.30273	3.86818	4.47518
ADCYAP1	11729961_a_at	2.66292	3.12778	3.10028	2.88929	2.8644	2.74663	3.00579	2.59884	2.75017	2.81414	2.71469	2.8476	2.73437	2.80127	2.57636	2.88748	2.76045	2.80797	2.7921	2.55896	2.66514	2.79128	2.75828	2.78055	2.64815	2.55861	2.77428	2.7256	2.94365	2.74592	2.7768	2.85811	2.74819	2.72285	2.64826	2.83791	2.77268	2.76329	2.65215	2.92508
ADCYAP1R1	11745147_a_at	2.48406	2.93133	2.99551	2.82923	3.00794	2.58623	2.87468	2.87394	2.75736	2.83017	2.6252	2.7986	2.90736	2.87025	2.53919	2.75101	2.89076	2.7986	2.97602	2.58218	2.72471	2.68843	2.54029	2.62879	2.64866	2.80391	2.69215	2.84079	2.55092	2.80454	2.73879	2.80547	2.85043	2.58106	2.49065	2.70822	2.17803	2.62534	2.57746	2.7516
ADD1	11716516_a_at	4.47564	5.48053	5.10762	5.60324	5.54609	4.91975	6.02756	4.89565	5.46822	4.56122	4.96405	5.13405	4.66566	4.76853	4.67751	4.66834	5.33593	4.73399	5.25612	4.56403	4.10814	4.99648	4.52764	4.67164	4.68275	5.28252	5.14796	4.63694	4.763	4.61507	4.81804	4.68599	4.56024	4.96824	4.59221	4.67821	4.75843	4.49241	4.6048	5.10865
ADD2	11760876_at	3.33309	3.39781	3.23421	3.38611	3.60487	2.8798	3.37113	3.56797	3.32035	3.037	2.84325	3.08723	3.15433	3.12717	2.88905	3.09459	3.31184	3.0903	3.19903	2.98557	2.88061	2.95107	3.03646	2.86174	2.96341	2.7876	3.309	3.02245	3.35466	3.18149	2.99787	2.58571	3.11307	3.00543	2.72291	2.99642	3.04442	3.16298	3.03233	3.20014
ADD3	11721606_a_at	10.3502	8.42591	8.71999	8.08196	8.45522	9.316	8.02513	9.119	8.99695	9.37698	9.46743	9.47337	10.0469	9.05884	8.58201	9.17554	8.57832	9.36494	8.45213	9.67302	9.96524	9.32766	9.01589	9.46302	9.33617	9.19966	8.49166	9.8571	9.23487	9.33407	8.63759	9.46061	9.26951	9.13587	9.4967	9.08606	9.87089	9.38704	9.96794	8.51872
ADGB	11723843_a_at	2.02805	2.34871	2.10737	2.23843	2.52981	2.31591	2.14934	2.2406	2.18171	2.04545	2.18192	2.22292	2.1031	2.22349	2.22011	2.32915	2.43671	2.21551	2.38486	2.20638	2.21608	2.20173	1.97705	2.27492	2.08823	2.61756	2.26037	2.07885	2.27538	2.26236	2.31012	2.09736	2.2723	2.26401	2.02361	2.15142	2.02524	2.09213	2.16265	2.16675
ADGRA1	11735301_a_at	3.60701	5.08326	4.72369	5.29152	4.32594	4.19317	5.06885	3.86022	4.5936	4.12277	3.90439	3.76401	3.92628	4.50091	4.26132	4.1428	4.83423	4.22189	4.60665	3.82184	3.62355	4.05281	3.8988	4.05242	3.91887	4.31635	4.11338	3.85392	4.00448	4.16996	4.4107	4.17464	4.10621	4.13213	4.1234	4.24296	3.85482	4.06988	3.9129	4.31573
ADGRA2	11732858_a_at	4.51698	4.52253	5.13142	5.7409	5.06451	4.36816	5.14337	5.30426	5.0424	5.36044	5.09121	4.93784	4.89365	5.32772	5.16943	5.05047	5.54981	4.97278	5.37843	4.77521	5.07635	5.0438	5.43491	5.16281	4.81509	5.12489	5.26735	4.53483	5.01372	5.2096	5.50185	5.27175	5.46859	5.49783	4.70563	5.19865	5.24238	5.19034	4.72932	5.51974
ADGRA3	11755533_a_at	4.48788	2.53096	2.19292	2.60104	2.45165	5.65552	2.42852	3.18061	3.32035	2.67783	2.8294	2.9474	2.64463	2.21855	2.69445	2.73026	2.62095	2.52395	2.72683	2.95566	2.31341	2.47893	2.70944	2.40698	2.61421	2.67564	2.61283	2.45076	2.42807	2.46763	2.6124	2.28614	2.46636	2.82869	2.54179	2.45224	2.36361	2.39001	2.78442	2.56392
ADGRB1	11715246_x_at	4.66864	5.69109	5.54753	5.80978	6.02904	5.16703	5.83177	5.20572	5.67812	5.24052	5.39846	5.22893	5.0214	5.3095	5.334	5.04051	5.84239	5.12001	5.57438	5.21682	4.94284	5.2088	4.96057	4.97104	5.23078	4.8959	5.29205	5.06099	5.39156	5.19393	5.76196	5.17877	5.03695	5.36881	4.93663	5.26415	5.21759	5.10942	5.03555	5.48051
ADGRB2	11753136_a_at	4.63658	5.32829	4.84135	5.07362	5.10938	4.44692	5.05025	4.15684	4.62733	4.66856	4.31118	4.30837	4.38904	4.64046	4.82179	4.70312	5.44365	4.65426	4.94818	4.75594	4.31697	4.54083	4.44509	4.66652	4.30856	4.4343	4.62988	4.59999	4.42483	4.71068	4.82734	4.73916	4.63235	4.86923	4.52046	4.83738	4.52271	4.48946	4.30893	4.83796
ADGRB3	11747972_a_at	2.23288	2.53751	2.44779	2.79639	2.72443	2.45154	3.07704	2.34824	2.37792	2.22486	2.57901	2.74146	2.53094	2.62654	2.46059	2.49327	2.61841	2.36233	2.88672	2.34491	2.46454	2.47446	2.42573	2.21464	2.53999	2.5542	2.67443	2.4427	2.39775	2.53635	2.58458	2.35274	2.30585	2.70353	2.4984	2.36385	2.43827	2.55588	2.44353	2.54496
ADGRD1	11731143_a_at	3.54086	3.44535	3.46049	3.50932	3.70588	3.24964	3.42922	3.86193	3.72763	4.30378	3.8531	3.6393	4.24409	4.10161	3.72045	3.6886	3.96038	3.91513	3.69949	3.88715	4.25902	3.34511	3.6886	4.29539	3.63768	3.40835	3.53777	3.48544	4.00226	4.26844	3.71371	4.16272	4.30004	3.9987	3.78148	4.19932	3.93226	4.34785	3.8067	3.7841
ADGRD2	11750340_s_at	5.71755	6.71041	6.05067	6.3154	6.49325	5.83003	6.22464	5.86586	6.2066	5.91962	5.70826	5.80371	5.66837	6.01078	6.04384	6.00212	6.39366	5.90316	6.23658	6.01	5.60937	6.06417	6.02447	5.80704	5.89855	6.40182	5.94758	5.93584	6.00773	6.00632	6.08311	5.75052	5.86447	5.89427	5.70902	6.03586	5.45011	5.8704	5.91493	6.16457
ADGRE1	11748205_a_at	5.42217	5.50738	5.63668	6.87267	5.93356	4.63258	5.07686	6.54836	5.57454	6.31558	6.55675	5.25651	7.29209	6.52701	7.34394	6.39566	6.09982	7.10664	6.83596	6.59084	7.21244	6.00881	6.7489	7.20039	6.11677	6.13139	6.10213	6.39045	6.94705	6.23878	6.21588	6.6175	6.56658	6.24386	5.96913	6.87893	6.60752	6.37075	6.29892	6.80334
ADGRE2	11735191_a_at	3.31072	4.56607	4.278	4.60954	4.56311	3.94733	4.55329	3.74028	4.48729	3.74389	3.96813	3.80423	3.8374	3.89202	4.04035	4.13982	4.23656	3.98972	4.24881	4.06978	3.48761	4.21114	3.88123	4.01565	3.78342	4.15374	4.06012	3.95453	4.02576	4.00476	3.78847	3.87405	4.02911	3.8061	4.3716	3.98638	3.91647	4.07489	3.9455	3.96323
ADGRE3	11750862_a_at	6.02875	5.06051	6.14755	6.29488	6.12423	4.21599	5.55469	7.81315	6.48787	6.68187	7.95683	7.11508	6.3819	7.45331	8.51888	8.28427	7.02229	7.68919	7.57259	7.65983	8.42273	7.56468	7.76	8.75436	7.05236	7.68354	8.24465	7.6021	8.38682	8.22866	6.5962	6.6054	7.71654	7.5243	7.4491	6.87345	7.32636	7.49854	7.81919	7.3215
ADGRE5	11750408_a_at	10.1216	9.43696	9.32963	8.80521	8.32642	7.72601	6.7991	9.45702	8.72643	8.80734	9.93027	10.036	9.44176	9.22075	10.264	9.60244	8.67591	9.65362	9.80786	9.43458	10.4528	9.45053	9.66359	10.1317	9.50276	9.85571	10.4654	10.0678	10.0918	9.58202	9.86442	8.6996	9.80886	9.2947	10.7491	9.57484	10.3946	9.42713	9.75525	8.60265
ADGRF1	11731538_a_at	9.39702	2.0426	2.28307	2.11506	2.01291	1.69739	2.37916	1.96979	2.06999	1.84442	1.73918	1.83497	1.86057	2.05334	2.01456	2.04578	2.23382	2.07412	1.90314	1.99191	1.74092	2.27782	2.07104	2.13506	1.79225	1.92239	2.02848	1.88359	1.78969	1.90358	1.96721	1.90866	2.06744	2.00992	1.97899	2.05738	2.02481	2.12619	1.72493	2.06351
ADGRF2	11742459_a_at	2.97112	3.51276	3.51688	3.71548	3.77016	3.09689	3.592	2.71348	3.24038	2.77721	3.01659	2.74684	2.99962	3.21554	3.1845	3.36292	3.79295	3.13837	3.05437	3.05637	2.92692	3.20443	3.23015	2.86641	3.23367	3.57456	3.29742	3.12968	2.928	3.18049	3.18987	3.07123	3.1496	2.85424	2.92401	3.05109	2.95109	3.22251	2.85267	3.66067
ADGRF3	11737188_x_at	2.81065	1.82628	1.99692	2.09654	1.97221	2.54865	1.96921	1.82209	1.76208	1.86285	2.11383	1.87936	2.51269	1.76502	1.67165	1.98514	1.94529	2.22364	1.97553	1.85104	1.85391	1.96577	2.12777	1.84882	2.12322	1.91811	2.11962	1.93029	1.99016	1.96818	1.98171	2.18165	1.93029	2.00536	1.79342	1.79576	2.44209	2.03456	2.11085	2.06006
ADGRF4	11752339_a_at	2.51811	3.1915	2.78964	3.26793	3.0256	2.40566	3.29759	2.97687	3.6808	2.61404	2.33737	2.37754	2.50516	3.20237	2.70433	2.91928	2.94254	2.64059	3.03402	2.64995	2.42876	2.63443	2.81447	2.54838	2.69464	2.81563	3.18056	2.8029	2.90957	2.79434	2.7895	2.52506	2.66835	3.00579	2.79395	2.86478	2.50139	2.72318	2.4391	2.92215
ADGRF5	11761989_at	1.93626	2.23359	2.61055	1.87164	2.11333	1.96377	2.50665	2.30301	1.72887	2.02088	1.96664	1.80943	2.00007	2.15228	2.03416	2.04907	2.14628	2.08388	2.06775	1.93064	1.87254	2.0112	1.73985	1.82729	1.98824	2.05762	2.15399	2.02531	1.91248	1.8209	1.73911	1.99685	1.93962	1.97842	1.82628	1.76818	1.65949	1.97308	1.89809	1.7925
ADGRG1	11723872_a_at	4.5951	5.47863	5.56163	5.7413	5.71757	5.24468	5.70644	5.05352	5.38109	5.00777	4.94424	4.96218	4.7762	5.27076	5.12076	4.74036	5.67324	5.16708	5.22924	4.94799	4.57348	5.06179	4.90727	5.00239	5.16763	5.34919	5.32562	5.06621	5.17605	4.94929	5.24161	4.96418	4.81187	5.18834	4.69969	5.12222	4.5615	5.04254	4.75087	5.59685
ADGRG2	11728122_a_at	2.37762	2.87763	2.38427	2.46332	2.26345	2.22496	2.5598	2.27093	1.95306	2.4943	2.45397	2.54768	2.31177	2.13484	2.39863	2.29962	2.66779	2.60876	2.35076	2.21266	2.27286	2.07289	2.38987	2.44762	2.46602	2.59	2.34455	2.31934	2.27948	2.25047	2.34594	2.47689	2.29911	2.66219	2.54179	2.31452	2.33641	2.42469	2.32207	2.2725
ADGRG3	11750979_a_at	6.59356	7.6246	8.1538	7.54263	6.22859	6.29663	6.2718	7.54877	7.02764	6.33396	6.95249	6.6351	6.39369	7.04038	7.66886	7.0612	6.469	7.09472	7.37632	6.74553	7.06855	6.90773	7.11128	7.4814	6.52153	7.1293	8.13689	6.93513	7.64279	7.09036	6.96501	6.63021	8.12629	6.39105	7.92479	6.94743	6.54243	7.28404	6.72185	6.53123
ADGRG4	11738616_a_at	2.68359	2.71519	2.6926	2.71556	2.54481	2.63034	2.83393	2.85651	2.89967	2.53011	2.76448	2.91123	2.40541	2.97003	3.04212	2.72468	3.1682	2.18279	2.76343	2.53236	2.27518	3.11027	2.56711	2.7181	2.4712	2.84118	2.7754	2.59543	2.77679	2.66691	2.82545	2.70618	2.43312	3.17018	2.46988	2.79051	2.59721	2.88916	2.74852	2.62197
ADGRG5	11762073_at	3.54952	4.12197	4.46894	4.53825	4.92092	3.72746	4.77667	4.05582	4.46902	3.5304	3.63883	3.45666	3.28645	3.9862	3.6652	4.1019	4.29381	3.60407	4.14708	3.81902	3.5256	3.9472	3.93468	3.65472	3.62661	4.06266	4.08305	3.74687	3.79988	3.83652	4.08681	4.01258	3.7797	4.04453	3.48889	4.04988	3.62692	3.85713	3.29823	3.81444
ADGRG6	11725188_a_at	1.939	2.00355	1.84179	2.17532	2.32986	2.17335	2.77379	2.15444	2.44361	2.05881	2.30892	2.02887	2.36589	2.27742	2.16962	2.18958	2.07571	2.23522	2.3185	2.09454	2.60391	2.09738	2.45055	2.24216	2.23522	2.19729	1.9855	2.27912	2.07008	2.04616	2.38726	2.2898	2.14905	2.39034	2.09431	1.96348	1.91734	2.22349	2.14018	1.95151
ADGRG7	11755911_a_at	2.50652	3.27483	2.88514	2.96818	2.71847	2.88811	3.26122	2.77099	2.92182	2.99976	2.75363	2.89223	2.65444	3.10113	2.9463	2.72889	3.33699	2.95377	3.24794	2.97845	2.69754	2.85211	3.26927	2.7395	2.87851	2.74188	3.05952	3.03458	2.97237	2.96818	2.84927	3.02516	2.84455	2.78723	2.95743	2.65854	2.80067	2.95002	2.80578	2.66794
ADGRL1	11721891_at	4.94548	4.91901	4.34331	4.7666	4.70949	4.72705	5.07558	4.58378	4.60264	4.54852	4.48583	4.79604	4.58111	4.93076	4.77495	5.34845	4.81755	4.77122	5.02206	4.83861	4.52944	4.63985	4.68144	4.521	4.65522	4.80888	4.74713	4.76621	4.56387	4.66117	4.65691	4.59628	4.57469	4.69042	4.37958	4.61357	4.47202	4.43997	4.52253	4.58782
ADGRL2	11745273_a_at	1.7145	1.88341	1.66793	2.27011	1.78567	1.66101	2.22349	2.09274	2.12952	1.86009	1.84157	1.85793	1.95013	1.91724	1.95626	1.86591	1.64165	1.89433	1.9587	1.91713	2.41449	2.05005	1.82305	1.94754	1.9825	2.03556	1.92895	1.80253	1.79904	1.70855	1.90428	1.92248	1.85348	1.66638	2.0471	2.15242	1.96002	1.89375	1.96583	1.77549
ADGRL3	11753153_a_at	2.81292	2.91101	2.99748	3.22803	3.3908	2.62429	3.06835	2.79454	2.86924	2.83067	3.06526	2.56875	2.72004	2.5632	3.283	2.93529	3.36354	2.83068	2.81461	3.07474	3.26601	2.68624	3.02643	2.74103	2.83497	2.94963	2.93308	2.92288	2.94963	2.95634	3.12357	2.86681	3.19582	3.15399	3.1928	3.03773	2.68334	2.83909	2.78363	3.08449
ADGRL4	11758653_s_at	1.71258	2.74804	2.6361	2.6771	2.41006	1.94917	2.18504	2.04024	2.11541	2.08107	1.97948	2.0487	1.97944	2.14762	2.12716	2.31727	2.64025	2.21061	2.32564	2.27066	2.17165	2.24023	1.94257	2.1862	2.14762	2.3772	2.41152	1.96177	2.02623	2.15685	1.97499	1.9923	2.10594	2.2285	1.87049	2.21839	2.16178	2.09703	2.16961	2.31037
ADGRV1	11728953_a_at	2.51605	3.3561	3.41087	2.94794	2.94722	2.64767	3.90004	2.70545	2.74668	2.72591	2.64395	2.52821	2.43529	2.5953	2.8717	2.79429	3.07866	2.84137	2.48145	2.61361	3.03682	2.82672	2.51346	2.95522	2.56062	2.78886	3.03894	2.79125	2.58819	2.70103	2.73876	2.72324	2.67967	2.90172	2.8404	2.95809	2.85179	2.78551	2.60023	3.07224
ADH1A	11728639_x_at	2.74172	3.24978	3.00671	3.39385	3.71501	2.84465	3.15707	2.80072	2.80737	2.89967	2.82057	2.90798	2.57059	2.97322	2.84337	2.83687	3.34779	2.8677	3.03945	2.75135	2.81153	2.79765	3.01397	3.1526	2.81995	2.87527	3.06002	2.94276	3.22668	2.98966	2.97419	3.24978	3.23517	2.92725	2.82671	2.97455	2.83734	2.7827	2.6699	3.35674
ADH1B	11722995_at	1.67931	2.16481	2.04196	1.89861	2.20244	1.84568	2.08884	1.69839	1.87603	1.78653	1.88314	1.6309	1.79865	1.89261	2.00967	2.08469	1.93267	1.87773	1.95178	1.67236	1.64222	1.88546	1.62691	1.57489	1.84568	1.89904	2.04	1.8655	1.94651	1.97118	1.8283	2.01065	1.95445	1.87506	1.77198	1.88403	1.85304	2.01383	1.5604	1.9308
ADH1C	11730779_at	2.53724	4.3119	4.03594	3.88096	3.57434	3.30537	3.78106	3.2562	4.0137	3.22871	3.36834	3.14936	3.42376	3.89346	3.34246	3.27555	4.26987	3.26591	3.65715	3.7231	3.28028	3.48006	3.29792	3.49108	3.57066	3.70849	3.44787	3.04199	3.33243	3.63397	3.9614	3.5628	3.68939	3.49485	3.02812	3.44092	2.99571	3.48917	2.93945	3.70579
ADH4	11754277_a_at	2.32838	2.49194	2.48831	2.673	2.82047	2.16214	2.21361	2.36208	2.34987	2.30104	2.67361	2.48691	2.55507	2.42569	2.285	2.1885	2.68398	2.33382	2.25512	2.54784	2.43271	2.43746	2.14942	2.29523	2.49734	2.57297	2.47976	2.35006	2.07932	2.06999	2.25484	2.23243	2.29854	2.50657	2.34944	2.33828	2.19743	2.38479	1.97196	2.49793
ADH5	11716392_s_at	7.1378	5.12957	5.6071	5.48526	5.50423	6.43648	5.44295	6.12247	6.42903	6.79501	6.16831	6.44586	6.90477	6.36994	5.90899	6.0965	5.85618	6.5975	5.62483	6.509	6.38255	6.22172	6.33191	6.15851	6.49514	6.15609	5.74167	6.52032	5.99765	6.22664	5.98671	6.8233	6.22295	6.55213	6.39362	6.09243	6.62288	6.50056	6.79065	5.84368
ADH6	11735686_a_at	1.82948	2.39639	2.39243	2.33465	2.69209	1.95309	2.08762	2.37608	2.04655	2.12788	2.4557	2.38806	2.01024	2.05334	2.04155	2.15058	2.07528	2.08812	2.23153	1.92079	2.3362	1.97455	2.21495	2.08812	1.84208	1.9191	2.22689	2.12583	2.23019	2.01456	1.96915	2.02305	2.29854	1.99998	1.99152	2.1937	1.95967	1.94258	2.12944	2.05082
ADH7	11728753_at	1.81071	2.44651	2.39083	2.10341	2.2474	1.86281	2.29562	2.22877	2.28894	2.06513	1.92799	2.03676	1.92212	2.00705	1.96945	1.92818	2.05803	1.99817	2.06888	2.02489	1.92992	2.15385	1.96795	1.89629	2.10281	2.16092	1.83274	1.71948	1.76725	1.83235	1.95523	1.79678	2.08404	1.91963	1.70531	2.12825	2.0091	2.15462	1.79017	2.15327
ADHFE1	11760146_a_at	3.15646	3.17509	2.59036	2.39267	2.90959	2.47045	2.92714	2.96378	2.8987	2.84669	3.75806	3.64027	2.8453	2.80077	2.96391	2.88739	2.73813	3.3497	2.97918	3.49263	3.21608	3.3992	3.06381	3.02815	3.88596	3.36089	2.8543	3.62651	2.75318	2.92341	2.4235	3.13188	2.53514	2.81402	2.70796	3.13793	2.48155	3.24637	3.74833	3.08242
ADI1	11745196_a_at	7.99505	6.59669	7.035	6.22839	5.67218	7.44108	5.83933	7.18767	6.92059	7.27688	6.82111	7.46933	7.45719	7.11623	7.25296	6.93573	6.44515	7.42022	6.93391	7.37239	7.4174	7.31079	7.38505	6.58488	7.31726	7.25332	6.56573	7.09149	7.08702	7.17732	6.34662	6.90538	7.07382	6.83577	6.97235	7.06548	7.44545	7.4854	6.76362	6.62638
ADIG	11737230_at	3.34269	4.02122	4.03822	4.07512	4.07149	3.64709	4.27471	3.89105	3.81027	3.33903	3.46576	3.39961	3.41776	3.73823	3.64553	3.71706	4.21863	3.74311	4.05842	3.62305	3.49697	3.96766	3.59556	3.45019	3.52184	3.7765	3.7214	3.51587	3.71388	3.70014	3.7733	3.75637	3.74814	3.86934	3.41961	3.69715	3.0553	3.63474	3.37417	4.02707
ADIPOQ	11752564_x_at	2.29177	2.68308	2.40304	2.5318	2.78409	2.32794	2.68694	2.84809	2.19618	2.38426	2.41387	2.32414	2.34247	2.48621	2.10493	2.60451	2.34137	2.19618	2.70364	2.28536	2.30606	2.5271	2.40298	2.32539	2.53305	2.41654	2.61343	2.40345	2.48379	2.29013	2.28167	2.35091	2.48676	2.42607	2.40709	2.36385	2.38508	2.32539	2.20305	2.45743
ADIPOR1	11715648_x_at	9.31745	12.1544	12.4754	12.2786	12.3221	11.8854	12.3425	12.0849	12.6525	11.8377	11.7917	10.8317	10.7581	11.7304	11.0446	11.2661	11.9075	11.6947	11.8042	11.2861	10.9523	11.6165	10.7136	10.9663	11.0048	11.4696	11.1307	10.9283	10.9811	10.7591	10.7467	11.341	11.0556	11.372	10.1636	11.2876	9.44831	11.1729	9.91382	11.4222
ADIPOR2	11716197_a_at	4.37185	5.30968	5.30279	5.16252	4.93445	4.80012	5.41716	4.47869	4.84	4.47869	4.44111	3.97981	4.28083	4.83115	4.5486	4.77041	4.77191	4.6715	4.71275	4.55104	4.24593	4.17364	4.57984	4.36516	4.91546	4.69423	4.46881	4.59221	4.66553	4.56272	4.9649	4.85981	4.60807	4.52306	4.89834	4.78297	5.00347	4.92624	4.28977	4.65959
ADIRF	11717306_x_at	4.00101	5.34414	5.05168	5.57644	5.45113	4.55944	5.61184	4.56329	4.85354	4.41301	5.00255	4.84373	4.6913	4.93671	4.93442	4.51366	5.46614	4.68621	5.20325	4.68644	4.40586	4.9456	4.74491	4.73057	4.84718	5.06967	4.86026	4.42763	4.81505	4.7953	4.89582	4.61052	4.52879	5.0522	4.71003	4.90942	4.59495	4.67326	4.48756	4.74762
ADK	11741123_x_at	4.49175	2.29223	2.30967	2.5633	2.72143	2.97234	2.39246	3.13902	2.82323	3.43068	2.70554	3.23336	3.49169	2.86416	2.45123	2.93293	2.74017	2.87399	2.75287	3.09306	2.85915	3.1748	2.61913	2.74942	2.69155	3.06093	2.65899	3.03619	3.12202	3.25393	3.12296	2.68856	3.02983	3.20206	2.77411	3.04761	2.96461	2.92653	3.09846	2.70672
ADM	11753618_a_at	5.83708	6.58381	7.39891	7.15795	6.36092	5.83391	6.36092	7.60553	6.1822	6.16078	6.57799	5.79034	6.69092	6.71477	7.09066	6.44905	6.18528	6.9275	6.95981	6.05741	6.17947	6.38198	7.27869	6.93262	6.51713	6.77117	6.98224	6.54175	7.05681	6.25223	6.86755	6.93114	7.83887	6.09716	8.01289	6.4913	7.17141	6.08662	6.55692	6.80717
ADM2	11730578_at	3.6269	4.99033	4.70174	5.03424	4.98178	4.59448	5.29994	4.08986	4.08322	4.08834	3.88317	3.67458	3.76972	4.36337	4.56534	4.50956	4.96896	4.3529	4.4846	4.30281	4.28089	4.60667	4.21996	4.30889	4.26127	4.61156	4.47867	4.14634	4.29413	4.50494	4.14444	4.3563	4.33831	4.80351	4.05987	4.23862	3.70735	4.22214	4.22454	4.95852
ADM5	11743797_at	3.81613	5.0073	5.07343	4.65963	4.83583	4.52729	5.1752	4.21357	5.0286	4.3237	4.31637	4.36913	4.13407	4.55849	4.39842	4.43054	4.78844	4.06656	4.71461	4.24528	3.96537	4.58947	4.22037	4.20455	4.32726	4.54338	4.42763	4.41419	4.54122	4.42281	4.64689	4.17001	4.39806	4.22839	4.2817	4.14092	3.75338	4.3495	4.13856	4.47798
ADNP	11740587_a_at	7.7314	6.41325	6.64804	6.27704	6.81921	7.54576	6.70275	7.05936	6.86668	6.9603	7.2004	7.07029	7.46149	7.03041	6.96816	7.10366	6.41315	7.12326	6.87556	7.26544	7.54869	7.36013	7.14125	7.3444	7.13495	7.22948	6.93275	7.1318	7.04429	7.07606	7.01488	7.20763	7.0684	7.03503	7.2874	7.10515	7.38496	7.17834	7.50342	6.64197
ADNP2	11719515_at	7.4535	5.29017	5.82099	5.54107	5.69104	6.45058	5.57466	6.10282	6.1155	6.43811	6.22217	6.6749	6.62856	6.03613	6.07062	6.3291	5.88856	6.50771	5.82626	6.42892	6.87955	6.38232	6.30069	6.30333	6.41575	6.31701	6.08532	6.36849	6.20471	6.13696	6.35502	6.35371	5.90631	6.49846	6.2659	6.23294	6.42513	6.35345	6.59847	5.69002
ADO	11719611_at	7.04058	5.03486	5.30334	4.8865	6.35834	6.9385	5.31247	6.19145	5.95235	7.08956	6.33943	6.17158	6.89807	6.40147	5.80837	5.84142	5.81697	6.35267	5.64754	6.40054	6.49041	6.27041	6.45728	6.29389	6.662	6.17483	5.56196	6.5908	6.10523	6.46181	6.4428	6.63801	6.36491	6.2794	6.85225	6.73126	6.9354	6.84859	6.62752	5.91449
ADORA1	11726658_a_at	3.37003	4.02572	3.77053	3.85892	3.7488	3.49667	4.28664	3.35391	3.47257	3.57718	3.39198	3.52209	3.43437	3.46551	3.47257	3.64093	3.72317	3.56896	3.79417	3.40427	3.49667	3.5691	3.41146	3.43795	3.43002	3.63299	3.45546	3.41533	3.73727	3.63631	3.51747	3.58289	3.71089	3.55362	3.27386	3.5304	3.16494	3.58463	3.28873	4.22182
ADORA2B	11741056_a_at	3.74955	3.32773	3.60407	3.58962	3.43856	2.88265	3.25624	3.5586	3.48865	3.93506	3.68969	3.9383	3.74832	3.83585	4.02566	3.78706	3.75819	3.72063	3.92327	3.58335	4.55529	4.15771	3.52821	3.77136	3.75489	3.74875	3.4578	3.73005	3.79272	3.74395	3.18898	3.97485	4.69736	3.55165	3.5375	3.78905	3.67138	5.23689	3.57025	3.19903
ADORA3	11726823_at	4.67556	5.33287	4.81394	5.00462	5.29097	4.042	4.5038	6.31718	4.89026	5.59019	5.26428	5.3479	4.6622	5.18984	6.52395	5.74817	5.42825	5.71122	5.90124	5.3077	6.41161	5.50958	5.81557	6.01204	5.48108	5.55171	5.02257	6.71679	5.70629	5.1937	4.73492	5.08814	5.44144	5.56487	5.50989	5.84352	5.26542	5.14541	5.82762	5.41065
ADPGK	11760360_at	2.59223	3.46731	3.18889	3.78736	3.39227	2.89043	3.66517	3.06917	3.29197	2.89226	3.06101	2.71261	2.77773	3.06699	3.01398	2.98676	3.20919	2.90611	3.55253	2.69202	2.93123	2.99196	2.68642	2.78683	3.4878	3.07667	3.18203	2.83339	2.79613	3.00579	3.14168	2.92618	3.01824	2.89967	2.77406	2.62796	2.60155	2.96863	2.98731	3.34473
ADPRH	11751283_a_at	3.2336	3.8895	3.72129	3.97492	4.06316	3.46425	4.06693	3.95153	3.65854	3.50264	3.73137	3.18772	3.21084	3.39109	3.54528	3.13048	3.88646	3.58376	3.3448	3.59389	4.03994	3.49119	3.65389	3.17651	3.6104	3.60421	3.30944	3.44665	3.22738	3.29803	3.55794	3.48575	3.30159	3.64057	3.4996	3.64254	3.73664	3.32531	2.99874	3.41741
ADPRHL1	11741422_a_at	4.9432	5.38399	5.21749	5.52876	5.22779	4.89079	5.28182	4.8819	5.32448	4.80907	4.78001	5.09579	4.79235	5.03709	5.04704	5.09757	5.45885	4.88461	5.19528	4.81636	4.79493	4.97456	4.95269	4.81897	4.99098	5.1285	4.88488	4.978	4.75601	5.07047	5.04111	4.86738	4.97267	5.05963	4.7246	4.91465	4.62575	5.05844	4.55321	5.08256
ADPRHL2	11750213_a_at	7.40109	5.8306	6.06582	6.24498	6.43252	6.50225	6.22659	7.12287	6.4081	7.19149	7.40896	7.1694	7.23777	6.9116	7.19613	7.05655	6.17736	7.01675	6.3844	6.90713	7.5095	6.66574	7.49548	6.93924	7.26461	6.9535	6.98322	7.21969	7.12451	6.90683	6.96868	6.96168	7.08076	6.95671	6.96283	7.00865	7.7732	6.84271	7.21835	6.84145
ADPRM	11751609_a_at	7.62233	5.18631	5.22348	4.95758	5.19506	6.90818	4.94278	5.25723	5.00507	6.08723	5.29537	5.53679	6.15649	5.4583	5.46524	5.49021	5.13563	5.52501	4.88135	5.73397	5.56898	5.43577	5.95464	5.22481	5.28854	5.26083	5.12594	5.39637	5.29395	5.40265	5.43805	5.67515	5.53561	5.77841	6.18541	5.32953	5.64393	5.3389	6.07166	5.08731
ADRA1A	11738830_x_at	2.61313	3.31461	3.40647	3.16796	3.95647	2.92884	3.55427	3.24016	3.76012	2.98151	2.77603	3.02125	2.87689	3.24643	3.18699	3.13417	3.52208	3.05553	3.50364	3.13764	2.89901	3.09299	3.28108	2.90212	3.16425	3.2143	3.24701	3.00709	3.01685	3.18972	3.19505	2.97581	3.04368	3.11902	2.98609	3.14729	2.53785	3.1068	2.9435	3.38545
ADRA1B	11737368_at	4.13178	5.50299	5.34295	5.38895	4.95678	4.5654	5.69409	4.50868	5.36585	4.52955	4.78845	4.22832	4.06391	5.06565	4.7377	4.89478	5.3122	4.8218	5.20115	4.32774	4.59996	4.83309	4.63658	4.62154	4.65304	4.71571	4.70313	4.44792	4.61285	4.64703	4.7075	4.40277	4.47784	4.85018	4.08998	4.55905	4.06551	4.58418	4.17534	5.13622
ADRA1D	11740618_at	2.97845	3.81206	3.15031	3.0774	3.3908	2.97712	3.74002	2.63884	3.52052	3.06198	3.27941	2.69522	2.68621	2.88383	3.18553	2.92624	3.64588	3.05653	3.46391	2.91542	2.65017	3.06915	2.86395	2.89186	2.91938	3.30624	2.91388	3.1379	2.65414	3.14615	2.91593	3.24719	3.02405	3.33685	3.04199	2.85206	2.86707	2.84219	2.64575	3.48791
ADRA2A	11722112_at	3.65489	3.86338	4.16501	4.66147	4.42718	3.95417	3.94781	3.87309	4.05945	3.5768	4.20217	3.5918	3.62862	3.91794	4.07928	4.09458	4.38323	4.27668	4.48095	3.61072	3.33278	3.94503	4.12801	3.82539	3.79209	3.94349	3.94349	3.93018	3.94677	3.91655	3.91518	3.65355	4.09194	4.10923	3.71505	3.85208	3.57811	4.05585	3.69759	4.19839
ADRA2B	11737497_at	5.48442	6.58864	6.46177	6.65888	6.73008	5.9863	6.67903	6.04067	6.42005	6.00101	5.8971	5.98718	5.66008	6.13018	6.07337	6.15938	6.49183	6.02556	6.31234	5.93276	5.78413	6.04702	5.76398	6.04046	5.9495	6.30431	5.98718	5.95411	6.25045	6.08209	6.01806	6.0935	6.1313	6.00201	5.73594	6.14302	5.73731	5.84179	5.82799	6.22988
ADRA2C	11728580_x_at	3.43005	4.90003	4.77483	4.95758	4.8274	3.76097	4.58968	4.18325	3.54985	3.56071	3.59237	3.56504	3.10129	3.89145	4.26835	3.88716	4.61265	3.75833	4.1808	3.72882	2.87188	3.81231	3.81589	3.79632	3.74701	3.80352	4.14008	3.32156	3.58591	3.68536	4.04288	3.95445	3.61999	4.17126	3.47282	4.09955	3.21107	3.79316	3.29965	4.47518
ADRB1	11729003_at	3.78416	2.94027	3.40269	3.35688	3.29211	4.0459	3.19092	2.87798	4.20522	3.59776	3.40947	3.51384	3.50722	3.36999	3.27638	3.66578	2.95927	3.13952	3.32617	3.48	3.41861	3.39102	3.25117	3.57921	3.95116	3.28248	4.38967	3.80082	3.88812	3.66673	3.49977	3.51258	3.58488	3.37172	3.17439	3.93404	4.76946	5.01759	3.10425	3.33438
ADRB2	11728728_s_at	7.46957	7.78192	7.5428	7.00628	7.74689	7.20245	7.11776	8.461	7.98778	8.75089	7.95342	8.43539	8.07526	8.33675	7.99396	8.07104	7.6478	8.61842	8.37534	8.67798	8.65766	8.63137	8.25569	8.60374	9.07833	8.25142	8.53984	8.80319	8.24737	8.22241	8.38869	8.59779	8.09818	8.23721	8.05504	8.67085	8.38029	8.76071	8.45136	8.05962
ADRB3	11732429_at	2.70369	3.46849	3.21508	3.18862	3.44196	2.76273	3.51237	3.17151	3.11997	2.63033	3.47404	2.79927	2.6508	2.92249	3.03464	2.83244	3.02532	3.07181	3.40454	2.95242	2.83437	2.79792	2.58301	2.83499	2.9193	2.93552	3.0226	2.83339	2.74844	2.88017	3.08355	2.86867	2.68618	3.14291	2.94112	2.74967	2.83036	2.60546	2.53274	3.23815
ADRM1	11750079_a_at	6.34339	5.78862	6.47867	5.84975	5.82006	6.57965	6.21939	7.10311	6.81642	6.40271	7.16943	6.6433	7.00809	6.17993	6.34821	6.11637	5.87237	6.25925	6.30296	6.42559	5.90251	6.33659	6.35694	5.79197	6.92502	6.43002	6.42498	6.3921	6.28514	6.41744	6.45488	6.40749	6.39935	6.04756	6.36654	6.4927	6.52688	6.43286	6.37031	6.46125
ADSL	11761227_at	2.29208	1.88221	1.75464	2.12619	2.01291	1.71542	2.32071	2.15104	2.1285	2.31969	2.22135	2.06952	2.21427	1.9235	2.05694	2.21222	1.88478	2.07275	2.14628	2.13821	1.8759	2.032	2.04249	2.17386	2.11044	2.25495	2.05709	1.96755	2.09297	2.08013	2.009	2.12856	1.9235	2.18682	2.07448	2.2516	2.2305	2.15414	2.06934	2.05335
ADSS	11743362_s_at	8.23335	6.37238	6.52819	6.2452	6.51007	7.5374	6.06329	7.14499	6.96799	7.61662	7.77607	7.73699	8.35965	7.69971	7.01092	7.15671	6.45102	7.46377	6.81649	7.71371	7.81436	7.38121	7.24403	7.58724	7.7217	7.41485	7.03783	7.87953	7.44768	7.36168	6.83134	7.6926	7.51949	7.03083	7.44828	7.77732	7.8462	7.68895	7.78853	6.69523
ADSSL1	11754888_a_at	4.17302	4.41621	4.32778	4.66934	3.92032	3.95727	4.76521	4.63471	3.93777	4.77218	3.70702	4.29195	4.31898	4.23899	4.53659	4.6787	4.35284	4.61396	4.94091	4.32529	4.58595	4.27916	4.69987	4.32583	4.54777	4.21649	4.73579	4.32621	4.07821	4.6833	4.80012	4.36732	4.59076	4.30754	4.28386	4.42908	4.2687	4.78715	4.47494	4.40006
ADTRP	11754924_s_at	3.31578	3.283	3.57084	3.23957	3.91001	3.35623	3.32326	3.12176	3.45311	3.46161	4.56456	4.26876	4.69171	3.49383	3.72884	4.87207	2.94802	3.85887	3.6218	3.94322	3.76176	3.76802	3.80614	3.51683	3.33628	3.74027	3.43251	4.81857	3.54787	3.29462	3.45932	3.85996	3.41916	4.19506	4.15259	2.89967	4.73197	3.3151	3.79623	3.49406
AEBP1	11717073_a_at	5.43399	6.03275	5.66318	5.89309	6.03041	7.87782	6.175	4.9425	5.14948	4.85173	4.82439	5.52493	4.58623	5.30887	5.36789	5.34714	5.99432	5.26519	5.62811	5.06771	4.62387	5.49434	5.40104	5.2224	4.98385	5.494	5.18617	5.14283	5.11665	5.37807	5.69832	5.15045	5.18344	5.34918	5.21039	5.16617	5.34419	5.0424	5.03261	5.82904
AEBP2	11740177_x_at	2.62572	2.41015	2.01057	2.31967	2.13941	2.4215	2.18196	1.99622	2.87727	2.43246	2.02573	2.52104	2.00267	2.30571	2.13211	2.39265	2.25571	2.51089	2.25984	2.55243	2.41375	2.2172	2.09185	2.40385	2.61812	2.17889	2.34323	2.74413	2.5445	2.56964	2.21139	2.48102	2.21139	2.47121	2.26175	2.12007	2.40564	2.33345	2.60385	1.95451
AEN	11754296_a_at	6.15562	6.53216	8.13176	5.92358	6.30537	6.91421	7.64346	6.19219	6.41858	6.00101	6.26283	6.58281	6.05681	5.9601	6.22635	6.26836	6.08096	6.21619	5.8205	6.00756	6.04442	6.17532	5.82648	5.83296	5.80752	5.97984	5.77428	6.22712	6.20078	5.97769	6.12972	6.0664	5.89712	6.22463	6.28001	5.965	6.2789	5.85171	6.2387	6.12918
AES	11753031_x_at	7.23261	6.45141	6.52779	5.9328	6.39836	6.6624	6.61692	7.04329	6.83768	6.69055	6.85305	7.8089	7.53211	6.73329	6.90999	7.03449	6.43944	6.99846	6.3353	7.06308	6.70929	7.22558	6.73069	6.27027	7.0888	6.78383	6.52631	7.28754	6.70724	7.06539	7.3967	7.00222	6.27836	6.8491	6.8786	6.34425	6.93334	6.7027	7.52374	6.84237
AFAP1	11733382_a_at	2.3133	3.43093	2.93385	3.09273	2.919	2.63034	2.92113	2.65231	2.48215	2.84489	2.51316	2.18912	2.58594	2.88762	2.74029	2.77712	3.03605	2.86061	2.9919	2.60992	2.74651	2.86577	2.8197	2.7031	2.5468	2.86909	2.83163	2.68894	2.78758	2.66271	2.80776	2.71074	2.67219	2.64761	2.83839	2.65824	2.32362	2.72576	2.44027	2.84367
AFAP1L1	11733205_a_at	2.77413	2.57099	2.47852	2.44209	2.55117	2.53972	2.73247	2.26986	2.94074	2.17101	2.47889	2.47582	2.00315	2.32638	2.29895	2.24807	2.65353	2.24784	2.23153	2.37459	2.13793	2.41927	2.3511	2.69069	2.07873	2.36197	2.64335	2.2378	2.38042	2.40261	2.37767	2.30793	2.21927	2.30875	2.19575	2.34037	2.16868	2.28179	2.35223	2.22873
AFAP1L2	11749667_a_at	5.59989	3.73684	3.45054	3.35209	3.49822	3.1687	3.41023	3.03076	3.92126	3.25053	2.61529	3.21416	3.36987	3.10588	3.28578	3.29567	3.41425	3.31601	3.22269	3.35333	3.6321	3.33722	3.4358	2.95373	3.43328	3.20939	2.92786	3.20463	3.18716	3.20869	3.10683	3.54734	3.58033	3.17094	3.34298	3.08692	3.14712	3.11845	3.1635	3.6321
AFF1	11761838_at	2.34383	2.25491	2.52821	2.44209	2.54088	2.32308	2.38212	3.84412	2.44893	2.76931	2.59291	2.64177	2.22046	2.58857	2.57589	2.62659	2.54531	2.33397	2.34199	2.45827	2.44999	2.73681	2.63206	2.40323	2.51255	2.29949	2.47731	2.32869	2.7485	2.28609	2.30373	2.57437	2.667	2.34909	2.54179	2.66092	3.42749	2.57992	2.43763	2.26198
AFF2	11745291_a_at	2.45577	2.76771	2.84216	3.08931	3.3173	2.34654	3.28844	2.65136	3.0992	2.20028	2.56934	2.33298	2.23667	2.74054	2.74738	2.34652	3.16931	3.14866	2.67106	2.47898	3.22012	2.89967	2.75388	2.42448	2.5016	2.80164	2.6363	2.57687	2.71534	2.43081	2.48823	2.71108	2.46733	3.16502	2.35293	2.37343	2.22071	2.07769	2.35243	3.12439
AFF3	11739697_a_at	2.52627	2.68951	2.78933	2.64677	2.91735	2.42922	3.10495	3.10461	2.84848	2.66037	2.97158	2.50237	2.82223	2.40688	2.77776	2.39092	2.90862	2.64233	2.87241	2.56667	3.1283	2.55102	2.83792	2.57096	2.44415	2.46834	3.01408	2.68102	2.53676	2.76028	2.59002	2.63498	2.50138	2.88423	2.49463	2.7779	2.74306	2.65819	2.66804	3.22453
AFF4	11720423_at	3.27187	3.19307	2.94935	3.64993	2.75761	3.10967	3.19682	2.78348	3.76926	2.81717	3.32244	3.1125	3.55684	3.17156	3.15286	2.84226	3.10827	3.02172	3.09148	3.24939	3.23009	3.26752	3.03827	3.10821	3.43238	3.08139	3.02045	3.33378	3.16237	3.14012	3.39953	2.69683	3.15849	3.00579	3.0741	2.85137	3.51043	3.31193	2.87246	3.1026
AFG3L2	11754692_a_at	5.9932	5.06842	5.185	4.83038	5.0931	6.38769	5.60057	5.51505	5.38577	5.70313	5.70986	5.81399	6.12073	5.43334	5.70313	5.5693	5.45617	5.61196	5.05229	5.93377	5.88069	5.71069	5.88253	5.72701	5.85431	5.54948	5.54108	5.63576	5.61558	5.51438	5.9122	5.73035	5.39366	5.29788	5.57064	5.66936	6.17843	5.91238	5.87654	5.60091
AFM	11730979_at	2.69799	3.40923	2.84886	3.24096	3.26771	2.72825	3.4711	2.67351	3.18112	2.82068	3.01898	2.73327	2.62295	2.93885	2.93152	3.01926	3.09728	2.69072	3.05102	2.74867	2.86748	2.95747	2.67802	2.77727	2.77379	3.0162	2.96397	2.94259	3.02527	2.89707	2.78287	2.90363	3.18901	2.96161	2.57294	3.02705	2.36106	3.15531	2.891	3.35232
AFMID	11760772_at	3.71388	4.41939	3.80936	3.98255	3.97731	3.65715	4.28643	3.94902	3.66775	3.59617	3.57794	3.9482	3.42533	4.04266	3.73438	4.11051	4.43966	3.91613	3.94431	3.80375	4.08256	3.96405	3.9051	3.90796	3.86115	4.07204	4.57528	3.66964	3.86614	4.22866	3.81251	3.79115	4.09096	3.81006	3.62769	4.07265	3.40862	3.81657	3.52638	4.13887
AFP	11718682_a_at	1.70196	1.92664	1.82306	1.7818	2.05558	1.74934	1.87041	1.92664	2.17308	1.88406	1.754	1.99754	1.8001	1.62657	1.85935	1.74594	1.65366	1.7355	1.81292	1.84473	1.68022	1.84008	1.86004	1.99647	1.65366	1.76672	1.76956	1.65097	1.82026	1.78683	1.68547	1.58867	1.74536	1.81172	1.82004	1.6661	1.75732	1.71095	1.51943	1.79256
AFTPH	11726701_x_at	5.32329	5.12626	5.66335	5.64293	5.2809	5.51158	4.58891	5.4094	5.07555	5.36498	5.34874	5.76152	5.286	5.27947	5.71618	5.55546	4.94732	5.32904	5.42411	5.32329	5.50795	5.30023	5.31234	5.50232	5.23712	5.19915	5.39223	5.31776	5.34462	5.41494	5.62438	5.13101	5.38784	5.37118	5.56173	5.27353	5.68531	5.15094	5.42575	5.30677
AGA	11723965_at	3.99512	3.283	3.33917	2.43264	2.83997	3.80846	3.02496	3.52377	3.4553	3.68967	4.23902	3.51823	4.66756	3.27402	3.18313	3.57065	3.34132	3.91789	3.08433	3.89195	4.2195	3.57271	3.51488	4.14936	3.91578	3.47117	3.19415	3.75652	3.48983	3.59677	3.16921	3.85005	3.79049	3.28868	3.80612	3.50644	4.02904	3.55199	3.95974	3.56095
AGAP1	11740493_a_at	2.0317	2.82377	2.44972	2.6771	2.79587	2.47963	3.31735	2.99503	2.52108	2.4756	2.45882	2.4208	1.95531	2.45768	2.46639	2.24788	2.67066	2.40748	2.51053	2.55896	2.28396	2.43014	2.5093	2.52923	2.56168	2.52963	2.37895	2.53328	2.41006	2.69986	2.72811	2.34895	2.19596	2.77656	2.15951	2.52413	2.23931	2.38378	2.42844	2.41581
AGAP2	11737018_a_at	3.58396	4.33574	3.96685	4.73419	4.12259	3.68665	4.21517	3.73524	4.12064	3.61773	3.80588	3.31846	2.96228	3.8496	3.67955	3.76174	4.1052	3.6705	4.19981	3.67204	3.24932	3.76131	3.49962	3.60861	3.69981	4.10941	3.93981	3.57391	3.56603	3.59947	3.95978	3.60075	3.45789	3.67659	3.72222	3.74501	3.52896	3.76131	3.56561	4.04302
AGAP3	11744561_a_at	3.26777	3.40558	3.67695	4.0108	4.17523	3.5509	3.97877	3.4462	3.18112	3.91904	3.56264	3.53497	3.49169	3.46855	3.26943	3.65098	3.87095	3.8717	3.26886	3.21821	2.88979	3.52653	3.46869	3.45356	3.04433	3.70872	3.09844	3.80699	3.55672	3.72469	3.51787	3.36908	3.43426	3.33172	3.63925	3.51748	3.36495	3.28317	3.34351	3.7102
AGAP5	11737245_x_at	6.77523	7.38872	6.92615	7.18967	7.25314	7.15064	7.29781	6.63633	6.7275	7.00255	6.58481	7.01499	6.69267	7.13956	7.15458	7.30008	7.50929	7.22516	7.12394	7.55972	6.80897	7.28036	6.7704	7.02093	6.75174	7.1532	7.21717	7.17678	6.94496	7.23177	6.55966	6.93506	6.98073	7.35385	6.76736	7.04519	6.71135	7.02657	7.22536	6.97375
AGBL1	11750236_a_at	4.69585	5.63043	5.0049	5.64949	5.42201	4.83762	5.34522	4.84119	4.65138	4.51971	4.96846	4.7322	4.88073	4.91739	5.18049	5.05142	5.50352	4.96362	5.3087	4.8429	4.83292	4.93636	4.67112	4.98239	4.88532	5.08139	4.91749	4.95794	4.93334	4.93914	5.28013	4.79354	4.88655	5.34012	4.8622	4.94387	4.55178	4.78725	4.61315	5.06128
AGBL2	11746998_a_at	2.1733	2.04561	2.16456	2.11063	2.33313	2.26134	2.20469	2.90384	2.45585	2.21286	2.38361	2.5126	2.51804	2.32476	2.02637	2.35425	2.342	2.22097	2.4215	2.2334	2.61741	2.32542	2.22729	2.29131	2.3498	2.17294	2.36453	2.19057	2.55046	2.37827	1.95402	2.16653	2.318	2.21298	2.30403	2.45224	2.23727	2.0995	2.3606	2.3214
AGBL3	11740768_at	2.18752	2.10339	2.12591	2.43487	2.57218	2.45622	2.37647	2.08861	2.5032	2.02638	1.93774	2.22108	2.11813	2.12739	2.00799	2.32153	2.11172	2.15599	2.30019	2.13006	2.09888	2.11293	2.09185	2.07927	2.05881	2.03365	2.07691	1.98101	2.03442	1.98796	2.12471	2.22108	2.00646	2.19971	2.12739	2.20081	1.9823	1.91992	1.84099	2.29477
AGBL4	11735659_a_at	1.82727	2.28214	2.19265	2.03717	2.28095	1.98632	2.08259	2.16046	2.00776	2.01041	2.12944	2.05564	1.82663	1.96436	1.94536	2.09344	1.9714	2.15104	1.96977	2.05482	1.70437	1.84473	1.88419	1.90673	1.76187	1.67771	1.70674	1.84078	1.93058	2.02584	1.92468	2.06639	1.96977	1.98295	1.90317	1.9945	2.13074	2.03717	1.79299	1.921
AGBL5	11732152_a_at	4.06905	4.87982	5.14502	5.16922	5.03214	4.95748	5.6217	4.19567	5.08995	4.09543	4.37343	4.01336	3.98938	4.08304	4.11496	3.9753	4.6644	4.4764	4.52258	4.21222	3.93356	4.29179	4.49887	4.14717	4.38046	4.21384	4.32236	4.14054	4.01615	4.06512	4.42766	4.16956	4.30004	4.52274	3.85583	4.2034	3.84375	4.28012	4.13921	4.26508
AGER	11753676_x_at	4.03409	4.7653	4.58641	4.75825	4.69621	4.23689	5.37668	4.2392	5.0786	4.21094	4.2692	4.77752	4.27856	4.36864	4.46334	4.47228	5.11681	4.3	4.76853	4.27262	4.37183	4.37268	4.17677	4.24657	4.16204	4.52203	4.5463	4.48585	4.40644	4.38251	3.9344	4.2814	4.69761	4.37136	4.25707	4.07731	4.32637	4.42732	4.24862	4.53847
AGFG1	11723607_a_at	5.66605	5.27796	4.98221	4.12329	4.93657	5.42963	4.3654	5.43375	5.18363	6.00031	6.0305	5.37473	6.79875	5.47707	5.3034	5.60817	4.73449	5.35658	4.94258	5.66025	6.30095	5.62863	5.43053	6.12751	5.40265	5.08891	6.01926	5.61146	5.34711	5.65486	4.93565	5.33287	5.98105	5.43297	5.75627	5.2941	5.98912	5.83625	6.05727	4.83016
AGFG2	11759961_at	3.1155	3.49652	3.30649	3.17205	3.3908	3.46119	3.14584	2.90381	3.06233	3.39688	3.59533	3.40187	3.09568	3.12282	3.76254	3.19051	3.49133	3.00479	3.73881	3.14597	3.14772	3.35293	3.78768	2.85365	3.42224	3.37493	3.72721	3.40302	3.04475	3.37037	3.45264	3.20464	3.56418	3.43294	3.54605	3.60599	3.37265	3.26424	3.28928	3.69293
AGGF1	11751538_a_at	3.59768	3.00225	2.8715	2.44737	2.31429	3.24964	2.73247	3.31339	2.90105	3.41412	3.32082	3.55439	3.63049	3.19055	2.91609	2.86252	2.53601	2.95393	2.91789	2.92472	2.932	2.945	2.8685	2.9766	3.09208	3.06945	2.67386	3.00017	2.69947	2.82813	2.80928	2.83739	2.9581	2.63786	2.96606	3.21373	3.1921	2.84725	3.0196	2.99427
AGK	11762881_at	1.88577	2.05074	1.7667	1.99291	2.02322	1.80044	2.02089	2.67701	2.23457	1.83674	2.12944	2.2112	2.08955	1.95975	2.01456	2.02528	1.7216	1.97698	1.89145	1.88834	2.43404	2.22235	1.92046	1.90993	2.15104	1.77497	1.81538	2.00245	2.15545	1.90358	2.04495	2.08602	2.15659	1.88303	1.89145	1.83038	1.93697	2.05773	1.94831	1.99093
AGL	11720889_a_at	3.11902	3.55203	3.25257	3.37661	3.37006	3.37312	3.06122	3.49934	3.35216	3.52677	3.19637	3.59538	3.23188	3.78446	3.35493	3.19385	3.19752	3.35897	3.65476	3.16037	3.17095	3.41561	2.99064	3.09037	3.3229	3.35897	3.20263	3.63644	3.19097	3.11995	3.24309	3.14963	3.31526	3.31526	2.68032	3.30359	2.65541	3.08607	3.38351	3.1532
AGMAT	11731675_x_at	3.4293	3.91065	3.62269	3.83773	4.24862	3.12112	4.2276	4.35454	3.96203	4.03855	3.45217	3.86862	4.21067	3.61913	3.63967	4.21171	3.82572	3.9772	3.48993	3.93743	3.40851	3.86889	3.58784	3.6221	4.05301	4.00982	3.33832	3.8584	3.76188	3.83166	4.02597	4.38487	3.51992	4.40197	3.65891	3.35912	4.33662	3.71673	4.64924	3.88473
AGMO	11740083_x_at	1.78988	2.07055	1.90738	1.97178	2.156	1.81768	2.15056	1.93057	2.24318	1.86024	1.73081	1.80184	1.94782	1.92808	2.01456	1.93209	1.81768	2.14723	2.23153	1.6468	2.24433	1.81532	1.8217	1.82959	1.97553	1.94782	1.76293	1.95754	1.83968	1.95757	1.87352	1.92082	2.04779	1.65094	1.96229	2.03895	1.84305	2.05653	1.97553	1.94185
AGO1	11755432_a_at	4.77035	5.4457	5.32147	5.44492	5.40325	5.18925	5.58134	5.47574	4.90288	5.34268	4.81242	4.87127	4.94615	5.5027	5.64255	5.52391	5.574	5.30553	5.42397	5.26452	4.95224	5.51256	5.32076	5.11592	5.25972	5.28175	5.48324	5.17277	5.26301	5.48478	5.45016	5.08627	5.35226	5.39325	5.34202	5.22758	5.10534	5.20913	5.07872	5.7175
AGO2	11754098_a_at	6.5087	7.57686	8.28928	7.45758	7.86742	7.47988	8.66464	6.66506	7.23064	6.69416	6.34777	6.02097	5.421	6.57476	6.57689	6.65139	7.16563	6.5005	7.03242	6.17021	6.27184	6.41045	5.93806	6.30021	5.97418	6.51689	6.9874	5.95325	5.95037	6.23376	5.91544	6.06517	6.34518	6.54057	6.62035	6.12519	5.969	6.08789	5.83524	7.00196
AGO3	11760530_at	3.58391	3.94059	3.99872	4.08787	4.26639	3.58319	4.00259	4.22431	3.79597	3.99136	4.33442	3.97244	4.04421	3.98315	3.75116	4.29407	4.17799	3.8342	4.36447	3.87633	3.3049	4.30746	3.47153	4.21382	3.97124	4.15455	3.74113	4.12607	3.94275	4.16881	3.35781	3.7856	3.97336	3.85808	4.0045	3.92047	4.29933	4.0641	4.23784	4.22037
AGO4	11759313_at	4.80528	4.74773	4.8845	4.53016	4.28118	4.02998	3.26586	5.52414	4.45664	4.79456	5.70256	4.87763	5.243	5.18759	5.93417	5.62124	4.3391	5.12306	5.0876	5.30964	6.16065	5.21231	5.42218	5.98625	5.05959	5.35506	5.57537	5.34053	5.59717	5.57575	4.9063	4.95619	5.97263	4.83336	5.7107	4.88251	5.77572	5.64086	5.24091	4.58898
AGPAT1	11750188_x_at	5.2148	5.28476	5.33072	5.38422	5.52472	4.79915	5.86619	5.41507	5.35909	4.64429	5.03706	4.92329	4.83057	5.15623	4.99919	5.31762	5.06555	4.99545	5.23847	4.83353	5.32119	5.25828	5.10522	4.85822	5.06952	4.87969	5.11144	4.98579	5.13248	4.87219	5.35419	4.93656	5.19537	5.24055	4.83291	4.81576	5.10711	5.10376	4.7237	5.12562
AGPAT2	11745598_x_at	6.82316	7.70998	7.64909	7.79143	7.59709	7.19337	7.96151	7.23613	7.71822	7.13453	7.06799	6.92326	6.7893	7.19205	7.02783	6.78543	7.32983	6.85481	7.49024	7.12615	6.25232	7.13988	6.8883	6.72699	6.79828	7.03503	7.37558	6.5025	7.04229	6.95044	7.04759	7.05213	7.03571	7.43747	7.0001	7.18621	6.89373	6.86737	6.59417	7.40008
AGPAT3	11733824_at	3.16339	3.84775	3.27114	3.40883	3.19239	3.22706	3.13166	3.23605	3.61113	3.33544	3.17878	3.33193	3.29121	3.35047	3.4093	3.55809	3.2217	3.1532	3.24462	3.32252	3.56356	3.31155	3.37319	3.33545	3.3229	3.29007	3.19477	3.79592	3.26954	3.31655	3.32193	3.10288	3.25552	2.84221	3.11213	2.96805	3.27188	3.357	3.18716	3.70248
AGPAT4	11721653_at	2.49292	2.71519	3.02908	2.73638	2.98456	2.63591	3.01975	2.39292	2.73638	2.73373	2.74984	3.04544	2.73405	2.71864	2.72942	2.63203	3.20437	2.85697	2.70823	2.64874	2.4811	2.88552	2.63417	2.65217	2.66126	2.57657	2.93174	2.75572	2.75287	2.736	2.65003	2.79112	2.70695	2.65471	2.83005	2.90173	2.57124	2.74737	2.51884	2.88573
AGPAT5	11756742_a_at	5.53865	3.55339	3.54943	2.93173	3.52365	4.38631	3.22299	3.71261	4.25483	4.41896	4.60072	3.76899	4.12306	3.62614	3.49829	3.39883	3.4468	3.61483	2.83569	3.67292	4.18928	3.48341	3.83689	3.43568	3.90666	3.93124	3.3229	4.03816	3.71279	3.73412	3.70094	3.77278	3.4954	3.63573	3.96877	3.68903	4.43412	4.27884	3.87471	3.612
AGPS	11723781_at	6.54698	2.6456	3.53506	3.30899	3.36323	5.55222	2.66805	4.16957	3.26518	5.10179	4.51474	4.51429	5.13928	4.54807	3.5801	3.3229	2.95159	4.08145	2.8451	4.35744	4.51336	4.28309	4.0072	4.44997	4.68275	3.64794	3.21172	4.39186	3.98349	4.207	4.14635	4.87786	3.91963	4.17011	4.6503	4.72686	4.93826	4.94863	4.52253	3.57165
AGR2	11746830_a_at	2.07971	2.55041	2.28307	2.13752	2.68605	2.42151	2.38945	2.19436	2.34966	2.06975	2.22962	2.38067	1.68223	2.21647	2.44209	2.2378	2.49975	2.36507	2.32404	2.18392	1.99928	2.36589	2.17832	2.2098	2.23115	2.21888	2.17312	2.08874	2.25882	2.09709	2.28145	2.21824	2.15633	2.30636	2.10888	2.22962	2.05313	2.17664	2.15196	2.05598
AGR3	11723524_at	2.13277	2.23308	2.25932	2.1589	2.35453	2.15004	2.3062	2.20073	3.25113	2.09781	2.16651	2.19189	2.41218	2.23482	1.96498	1.99932	2.4134	2.34676	2.18196	2.30162	2.07004	2.06861	2.25736	2.1862	1.99231	2.3361	2.26327	1.89861	2.25475	2.17769	2.26421	1.84794	2.1789	2.1605	2.10601	2.34697	2.03857	2.39331	2.05915	2.32354
AGRN	11732451_a_at	5.62877	6.46537	6.06099	6.23659	6.02796	6.06652	6.34719	5.95468	6.3582	5.66307	6.00042	6.0532	5.72185	5.90943	6.12258	5.85239	6.25734	5.98749	6.14377	5.87604	5.57739	5.98705	5.86943	5.88682	5.79926	6.31307	5.88106	5.82036	5.99084	6.01099	6.08676	5.62562	5.9424	6.14852	5.93827	5.66678	5.39763	5.91038	5.56747	6.15891
AGRP	11730571_at	2.75868	3.79236	3.78377	3.74097	4.07011	3.54974	3.65117	3.37859	4.14475	3.11241	3.19185	3.12828	3.23898	3.53597	3.37696	3.60164	3.7323	3.33659	3.37592	3.3908	2.793	3.28001	3.02251	3.33193	3.16671	3.19604	3.32568	3.15214	3.26194	3.3229	3.44325	3.37697	3.4516	3.25406	2.97337	3.32559	2.86834	3.17358	3.06835	3.52453
AGT	11730726_s_at	2.53329	3.49652	3.13707	3.63307	3.57313	2.72666	3.54834	3.38755	3.45356	2.99642	2.80482	3.30241	2.3235	3.02621	2.84181	2.72922	3.07316	2.82854	3.2164	2.79869	2.7513	2.93722	2.83244	2.81261	2.83164	3.053	3.05706	2.60999	2.91936	2.81406	2.81975	2.69569	2.57236	2.96045	2.58363	2.6673	2.4166	2.87099	2.48613	2.86556
AGTPBP1	11752306_a_at	6.26715	6.86248	7.18522	5.42709	5.71101	5.89352	6.15301	6.1633	6.40217	6.88602	6.80292	6.53277	6.80201	6.84065	6.44987	6.34495	6.22515	6.74574	6.37526	6.87189	7.65037	6.48596	6.84708	7.36572	6.6773	6.41521	7.26673	6.80625	6.51379	6.65005	5.88272	6.44141	7.54914	6.1867	7.26423	6.59462	6.97644	7.11419	6.67314	5.47057
AGTR1	11740227_s_at	2.05993	2.46127	2.52821	1.99566	2.46346	2.22812	2.38172	2.18663	2.22296	2.1763	1.97553	2.43514	2.39367	2.39917	2.35711	2.31243	2.49211	2.39357	2.23733	2.3686	2.423	2.33467	2.2104	2.31136	2.46607	2.34505	2.35711	2.44108	2.47427	2.22483	2.24165	2.3217	2.47001	2.32581	2.19072	2.58282	2.45617	2.4781	2.47551	2.53315
AGTR2	11733391_at	2.11241	2.589	2.48905	2.59841	2.62807	2.47946	3.40075	2.20899	3.01976	2.02438	2.3891	2.25477	1.77605	2.22349	2.54435	2.25058	3.01722	2.33382	2.32473	2.16597	2.34745	2.19907	2.33403	2.30146	2.04868	2.69257	2.28927	2.50451	2.07676	2.29502	2.19365	2.39895	2.11173	2.43952	1.95505	2.46089	2.03847	2.18414	2.01888	2.67108
AGTRAP	11753685_a_at	8.13159	7.71808	8.31818	7.84906	7.00917	7.027	7.16871	8.81394	7.56089	8.28319	8.37019	7.98453	8.38175	7.92107	8.08596	7.99885	7.51147	8.15953	8.13889	8.05122	7.95627	7.88712	8.388	8.08442	8.33799	8.03777	8.57846	7.93289	8.3194	8.0285	8.03806	8.18277	9.11336	7.93484	8.77779	8.30211	8.76525	8.49368	8.08823	8.33235
AGXT	11762478_at	2.0021	2.4525	2.3	2.69001	2.58341	2.22812	2.84004	2.67293	2.53801	2.10154	2.18807	2.41704	1.94701	2.42411	2.17305	2.37978	2.43007	2.71608	2.11437	2.23579	2.21331	2.26539	2.45224	2.54736	2.05883	2.39652	2.25838	2.23473	2.15545	2.38576	2.14802	2.26333	2.29209	2.28877	1.91915	1.8842	2.06377	2.21059	2.18007	2.40925
AGXT2	11743920_a_at	3.00878	3.88434	3.78514	3.8969	3.84311	3.28078	4.03878	3.25464	3.44828	3.19523	3.01594	2.80912	3.3205	3.04385	3.35869	3.42894	3.54013	3.34007	3.53784	3.34117	3.30318	3.32841	3.51799	3.1481	3.26972	3.38122	3.24916	3.10007	3.15423	3.39991	2.99626	3.39969	3.19887	3.21322	2.92863	3.40959	3.13522	3.38619	2.91865	3.85183
AHCTF1	11730253_a_at	5.53427	4.06885	4.58328	3.77731	4.02998	5.29919	3.54519	5.00829	4.76748	5.60963	5.63062	5.70081	5.86469	5.18573	5.37649	5.79632	5.18181	5.37511	5.21468	5.94464	6.70137	5.41701	5.62795	6.33919	5.37936	5.54603	6.32729	6.00675	5.79508	5.84872	4.59882	5.38113	6.46332	5.62267	6.5907	5.7305	6.24596	5.42112	6.33645	4.53238
AHCY	11745929_a_at	8.54247	4.63031	5.19514	4.76052	5.28785	7.9059	4.85644	5.59302	4.96795	6.7911	6.39379	5.66343	6.50975	6.11305	5.90605	5.94794	5.38124	5.75509	5.39959	6.0001	5.34283	5.96304	6.44453	5.74193	6.47869	5.53622	5.68266	5.79291	5.95346	6.02754	6.54117	6.04056	5.87624	6.11193	6.46219	6.1853	6.55259	6.68011	6.06596	6.06203
AHCYL1	11745746_a_at	6.74086	5.35091	4.95974	4.26897	4.83196	7.82224	4.42352	6.04481	5.43937	5.73189	6.11206	5.68151	6.16229	6.00031	6.31607	6.25197	5.06404	5.71283	5.5936	6.04225	6.53743	6.09327	5.96451	6.1517	6.0347	5.97309	6.31715	5.97366	6.20305	6.11097	5.84488	5.71936	5.87406	5.65278	5.87885	5.87102	6.23538	6.08588	6.04743	5.76641
AHCYL2	11721560_a_at	5.13131	5.86967	5.76655	5.873	5.95976	5.3162	6.16137	5.83645	5.84515	5.25205	5.53709	5.43687	5.11162	5.33116	5.47412	5.60679	6.09185	5.44712	5.61637	5.0649	5.39086	5.5019	5.50236	5.51106	5.58227	5.4436	5.6974	5.38489	5.34133	5.62995	5.52676	5.49822	5.31677	5.33797	5.46243	5.44596	5.32116	5.23338	5.3001	5.46279
AHDC1	11735080_at	5.28214	6.34252	5.9052	6.25809	6.01432	5.80876	6.20069	5.63397	6.0639	5.63579	5.60324	5.8721	5.5342	5.71919	5.82688	5.65228	6.23443	5.9671	6.03007	5.60198	5.35237	6.00242	5.59468	5.53186	5.47637	5.94296	5.84271	5.65416	5.64488	5.65248	5.7623	5.7382	5.76811	5.86506	5.60661	5.60669	5.19731	5.73365	5.31402	5.95468
AHI1	11754693_a_at	2.1489	2.05788	2.20807	2.08228	2.16269	2.9307	2.04996	2.10578	2.19447	2.20611	2.29854	2.18404	2.44942	2.04479	1.83035	2.07219	2.05495	2.26628	2.04327	2.51862	1.98291	2.26577	2.40681	2.15648	2.04803	1.8333	2.0874	1.97112	1.98754	2.0768	2.04121	2.33518	2.00646	2.03154	2.26784	2.12192	2.3717	2.48248	1.95557	2.31332
AHNAK	11725501_at	6.11997	5.13827	4.42748	3.92882	4.64144	4.66394	3.52994	4.85048	5.0876	6.51466	5.20054	6.07191	6.24069	5.53797	5.11436	4.92171	4.72112	5.5255	4.97199	5.84834	5.64888	5.23022	5.85827	6.31158	6.16279	5.43381	5.73618	5.30093	5.33609	5.76214	5.73368	5.73102	6.03258	5.4928	5.30362	5.4849	5.54035	5.90141	5.35182	5.22531
AHNAK2	11717131_a_at	2.1489	3.07028	2.61136	2.43817	2.38531	2.29797	3.0659	1.8901	2.67356	2.38777	1.98402	2.42451	2.17085	2.34488	1.92336	2.47201	2.47303	2.17587	2.71922	2.32289	1.95422	2.46909	2.37865	2.3284	2.53415	2.51539	2.42177	2.42045	2.32398	2.24475	2.44411	2.56724	2.49887	2.16775	2.54179	2.27455	2.17146	2.32122	2.33949	2.54652
AHR	11739680_a_at	5.19573	4.47183	4.16417	5.09122	4.11047	3.86641	4.32283	3.57349	3.75985	4.07199	3.7871	3.90671	3.86325	4.52507	4.08024	3.88652	4.27598	4.17057	4.27861	4.51326	4.03381	4.50283	4.28855	4.32782	4.66998	4.36662	4.35228	4.36506	4.1575	4.31347	4.2937	4.34773	4.76201	4.2867	4.53149	4.80914	4.53178	4.49717	4.32445	4.33861
AHRR	11729561_a_at	3.13991	3.06832	2.81151	3.11732	3.21843	3.20854	3.70737	2.5923	3.32035	2.94522	2.95535	2.55274	2.84167	2.97499	2.97619	3.61842	3.389	3.8561	2.98423	3.61722	3.48066	3.55485	3.42163	3.49495	3.12926	3.13174	3.03097	3.14169	3.02	3.12208	2.7207	3.16952	3.01182	3.09553	3.02349	3.09603	2.86242	2.95927	2.6881	3.19842
AHSA1	11745762_x_at	7.13861	6.43746	6.72464	6.73503	6.4466	7.46618	6.78881	7.09614	6.93023	6.82601	7.07585	7.01505	7.32813	6.69563	6.83792	6.81014	6.50486	6.88804	6.95674	6.95974	6.8166	6.95198	7.08234	6.78286	7.11395	6.87632	6.76452	6.98471	7.03122	6.99612	7.07605	7.15792	6.56833	6.90276	6.91073	6.80382	7.20721	6.95136	7.25309	6.93537
AHSG	11746474_a_at	2.06867	2.60728	2.22372	2.44216	2.43087	2.20044	2.6752	2.19246	2.70944	2.10807	2.39194	2.51081	1.87963	2.23307	2.1355	2.24221	2.46013	2.09379	2.3217	2.25135	2.15308	2.22171	2.0337	2.11369	2.08494	2.21559	2.42469	1.88396	2.36046	2.09335	2.36207	2.15737	2.00947	2.31026	2.02558	2.15215	2.15959	2.05131	2.22372	2.47408
AHSP	11718997_at	9.22388	11.057	11.5584	11.2486	11.4598	10.7318	12.2356	7.7534	11.2958	9.68589	8.44303	7.82724	7.93185	9.57062	8.39867	7.66201	10.375	9.4465	10.3033	8.48204	7.34465	8.21932	7.19147	7.96339	8.09639	8.81519	7.59874	8.05828	9.02994	8.36654	7.48409	8.5886	8.25359	8.91919	8.80979	9.16495	4.71047	8.28045	6.2915	9.45448
AICDA	11730925_at	2.1287	2.3579	2.21246	2.79834	2.39266	2.16339	2.76269	2.04313	3.11048	2.29854	2.40816	2.52821	2.04204	2.12702	2.1682	2.16279	2.64696	2.38456	2.44841	2.3505	2.54098	2.5054	2.20791	2.2356	2.21246	2.41813	2.18326	2.45049	2.08374	2.26152	2.38765	2.39345	2.75335	2.45008	2.24225	2.21589	2.38555	2.53724	1.97553	2.78784
AIDA	11760411_x_at	2.61249	3.43201	2.91925	3.24152	3.4277	3.1513	3.43238	2.89803	2.78647	3.26936	2.95862	2.52624	2.73568	3.23351	3.16798	3.12451	3.15792	2.76619	2.91773	2.91233	2.43007	2.7312	2.74513	2.92282	2.73437	2.64695	2.78825	2.95438	3.38264	2.86106	2.74516	3.0384	2.62202	2.94633	2.85189	3.32878	2.06963	2.9119	2.77419	3.17994
AIF1	11753076_a_at	4.61741	5.46544	5.6847	5.5661	5.60035	5.12142	5.62384	5.16822	5.83988	4.88577	5.63402	5.12554	5.08164	5.30095	5.23914	5.32327	5.66251	5.40879	5.52051	5.30223	4.92464	5.38319	5.0243	5.23924	5.3937	5.20054	5.31506	5.01289	5.3762	5.27828	5.31933	5.13577	5.07411	5.61879	4.86714	5.20506	4.7964	5.13462	4.73138	5.60246
AIF1L	11754966_a_at	6.56593	3.78694	3.71388	3.76023	3.41619	3.1943	3.67349	3.47206	3.47819	3.48859	3.33406	3.30231	3.50423	3.1635	3.51639	3.5178	3.74315	3.65713	3.66443	3.26946	3.4827	3.69619	3.58584	3.51532	3.24821	3.79861	3.39133	3.50909	3.37669	3.55624	3.60839	3.56737	3.44489	3.45493	3.43451	3.22899	3.47411	3.50732	3.04065	3.62522
AIFM1	11718383_a_at	6.46336	4.77807	5.04413	5.27319	4.98311	5.97968	5.27569	5.77301	5.25656	5.92475	5.9722	6.33038	6.22049	5.52783	5.86468	5.79884	5.05642	5.73309	5.38595	5.76823	6.18026	5.80702	5.92141	5.95833	6.10895	5.65459	5.74802	5.7714	5.73	5.66746	5.96618	5.97242	5.67992	5.73177	6.1374	5.99865	6.43683	5.98217	6.13278	5.43431
AIFM2	11762491_at	1.93878	2.52831	2.18077	2.36536	2.3715	1.79472	2.69392	2.48103	2.25046	2.12454	2.03715	2.59229	1.7463	2.18494	2.04376	2.04552	2.19849	2.1366	2.29142	2.06228	2.12535	1.97152	2.10047	2.19228	2.12068	2.45396	2.31506	2.11094	2.10494	2.09671	2.12261	2.18867	2.14809	2.49417	1.85696	2.08337	2.20837	2.01679	1.96419	2.20156
AIFM3	11747531_a_at	3.32709	4.44352	4.26324	4.53016	4.33501	3.38755	3.88395	3.63282	3.90952	4.20757	3.88297	3.72426	3.37297	4.17559	3.85501	3.8974	4.56323	4.17984	4.33769	3.82813	3.96688	4.05046	4.05408	4.01729	3.85345	4.14803	4.25336	3.82824	4.07246	4.13811	4.01449	4.31883	4.21048	4.0585	3.94872	4.13996	4.09146	4.15673	3.86989	3.94212
AIG1	11761518_a_at	3.41449	3.47339	3.61098	4.56999	3.53753	3.76364	3.66321	3.78253	3.28152	4.38064	3.84761	3.36288	3.85161	3.31045	4.09571	3.9972	3.46798	4.65939	4.4784	3.58214	3.76354	4.29128	4.24185	3.80514	3.46963	4.21494	3.40503	3.91315	4.12265	3.90449	3.75712	3.50871	4.16064	3.81039	3.83041	3.58756	3.90122	4.17942	3.9865	3.63118
AIM2	11730458_at	5.57048	6.78165	8.12439	7.15766	5.78283	4.92732	4.48469	7.51779	5.84152	7.48929	6.75323	6.32799	6.98867	6.82489	6.43458	5.97943	5.36262	6.66333	5.48632	5.81908	7.69867	5.96837	7.61732	6.65819	6.91302	5.98795	6.29248	6.43344	6.92035	5.15996	6.55878	7.2417	7.25082	5.88524	7.7948	7.40385	7.58248	6.57172	6.58255	6.51655
AIMP1	11718123_at	5.94485	4.12711	4.7128	3.87229	4.88953	5.61842	4.24085	4.98724	4.84816	5.8469	5.4522	5.29466	5.97265	5.1739	5.05819	5.08689	4.46793	5.25058	5.00942	5.74808	5.70518	5.25871	5.68943	5.57702	5.27801	4.82719	5.03917	5.50855	4.98153	5.23959	4.99783	5.43969	5.28578	5.23696	5.4083	4.84143	5.36503	5.35372	5.65811	4.22037
AIMP2	11716563_s_at	7.32073	6.37499	6.35386	6.31025	6.2684	8.10263	6.57028	6.46058	6.26263	7.25354	7.00969	7.10042	7.20703	6.69609	6.97589	6.67235	6.46843	6.69264	6.73769	7.00692	6.79426	6.87596	7.15949	6.89117	7.33369	6.74342	6.72702	6.77458	6.7736	6.91612	6.86638	6.97151	6.78077	6.85231	6.89027	7.0409	7.31997	7.30546	7.10464	6.96069
AIP	11715980_at	8.20881	7.11116	6.98013	6.97288	6.8646	7.34298	7.02484	7.71789	7.48063	7.69618	7.57481	8.14093	7.81341	7.40966	7.55459	7.57952	7.13381	7.50473	7.22178	7.69027	7.68281	7.41535	7.69404	7.54103	7.95038	7.5386	7.59191	7.64682	7.63464	7.44082	7.73951	7.67733	7.46592	7.80473	7.60172	7.45879	8.24794	7.71709	8.14338	7.41084
AIPL1	11727434_a_at	3.31381	3.70681	3.65834	3.8311	3.96866	3.60339	3.50184	3.13711	3.56414	3.20596	3.21901	3.02015	3.17705	3.30689	3.36825	3.488	3.70221	3.31548	3.38508	3.283	2.77569	2.91144	3.53516	3.57052	3.07693	3.5263	3.20975	3.39309	3.27805	3.35876	3.12811	3.23902	3.34075	3.25596	3.3564	3.52599	3.14727	3.15317	3.19891	3.24092
AIRE	11735865_a_at	3.55484	5.22122	4.96245	5.07793	5.42717	4.58959	5.73642	3.93259	4.89417	4.21178	4.49396	4.45989	3.95369	4.66941	4.34234	4.41305	5.3972	4.65375	4.78275	4.50624	4.20312	4.68056	4.61673	4.33057	4.40793	4.6776	4.66223	4.17924	4.60667	4.4448	4.83354	4.52643	4.34854	4.82787	4.08296	4.46853	3.71526	4.32236	4.08145	5.21563
AJAP1	11732730_at	2.86449	3.22538	3.09677	2.96107	2.64883	2.71922	3.41288	2.4024	2.95151	2.64858	2.71276	2.74684	2.78861	2.70216	2.92635	3.01346	3.16943	2.61854	3.11437	2.88167	2.5958	2.57448	2.42246	3.3815	2.7877	2.80709	2.68963	2.77844	2.88422	3.08592	2.86492	2.98107	2.90916	3.06554	2.45225	3.15336	2.75607	2.62743	2.93524	3.22767
AJUBA	11726012_a_at	3.11902	2.18867	2.36224	2.38775	2.48292	2.74104	2.18353	2.22274	2.1068	2.11721	2.29854	2.19076	2.22812	1.99191	2.28131	2.05905	2.23227	2.12571	2.32231	2.365	1.96784	2.3506	2.30941	1.99174	2.23227	2.41194	2.11866	1.932	2.16854	2.14804	2.25298	2.29499	2.10866	2.3438	2.17137	2.02401	2.17094	2.14966	2.15631	2.20473
AK1	11716267_at	5.64236	6.63981	6.49101	6.38165	6.70781	6.20161	6.77667	5.73732	6.43162	5.3319	5.60583	5.83061	5.40156	5.85907	5.91914	5.80096	6.61025	5.83193	6.09294	5.73422	5.2287	5.82079	5.27153	5.56869	5.76552	5.56481	5.81463	5.48142	5.82311	5.75113	5.77665	5.70991	5.47216	5.73915	5.06096	5.50764	5.19376	5.77811	5.6857	5.82747
AK2	11760208_at	3.79833	3.89283	3.73552	3.92026	3.81154	3.63201	3.41945	3.13194	4.20107	3.68663	3.26405	3.04702	3.32128	3.576	3.27715	3.48779	3.0005	3.31628	3.76047	3.38834	3.21331	3.43904	3.61047	3.48683	3.4653	3.8244	3.41858	3.53007	3.28785	3.71123	3.58849	3.19985	3.49169	3.33841	3.43899	3.44211	3.12764	3.46933	3.40889	3.4116
AK3	11758884_at	4.51781	2.93591	2.72047	3.16215	2.91669	3.74627	1.9943	3.16434	2.59143	2.92093	2.95295	4.208	3.86325	3.44934	3.23772	3.73102	2.83802	3.55323	3.33779	3.27196	3.90449	3.50392	2.3567	3.58195	3.49415	3.15488	2.64408	3.62063	3.24802	3.08659	3.1115	2.91691	2.60089	2.72974	3.4153	2.90509	3.78386	3.05362	3.93771	2.80319
AK4	11758943_s_at	3.84491	3.14882	2.77089	3.18512	3.51064	3.27882	3.27325	3.2107	2.80107	2.94977	2.79716	2.68399	2.78674	2.64969	2.95946	2.90376	3.25271	2.77423	2.98667	2.7242	2.79084	2.65116	2.65874	3.02355	2.45723	2.74684	3.02934	2.67027	2.77691	2.82435	2.42915	2.62909	2.82905	2.89096	2.55198	2.86101	2.34594	2.42514	2.3499	3.05761
AK5	11729381_a_at	2.3514	2.09655	2.14619	2.13594	2.36706	2.31934	2.2154	2.42953	1.98613	2.1813	2.21877	2.67224	3.17851	2.83457	2.14619	2.19651	2.39331	2.4112	2.33891	2.22201	2.10833	2.72994	2.4496	2.27588	2.15402	2.37572	2.28845	2.13754	2.00454	2.11482	2.26174	2.65817	1.92686	2.78723	2.11597	1.91472	2.11163	1.85915	2.86371	1.59848
AK7	11733432_at	2.46818	2.78692	2.89903	2.5704	2.59629	2.85248	3.40591	2.4065	2.92832	2.38091	2.15702	2.29484	2.10167	2.18853	2.66927	2.33673	2.44647	2.43394	2.4065	2.87195	2.32921	2.34344	2.47046	2.41094	2.31263	2.12086	2.36928	2.15327	2.36854	2.36605	2.23277	2.18146	2.29218	2.46043	2.14291	2.31164	2.4101	2.20337	2.12686	2.26115
AK8	11734262_a_at	3.9455	5.14507	4.51952	4.60954	5.15168	4.31657	4.93153	4.20572	4.31666	4.12242	4.43855	4.03011	3.71052	4.50892	4.28806	4.52363	4.70821	4.4952	4.5595	4.10193	3.8884	4.7153	4.36047	3.92102	3.95424	4.46345	4.28265	4.15501	4.16383	4.10065	4.53758	4.18625	4.15633	4.48732	4.11064	4.08752	3.9892	3.91489	4.01938	4.43855
AK9	11759209_at	2.22969	2.53084	2.20769	3.30355	2.63381	2.32647	2.7287	2.57448	2.80483	2.54179	2.27761	2.64595	2.77745	2.59775	2.63572	2.53026	2.91063	2.27113	2.72109	2.46175	2.77575	2.73685	2.24083	2.40738	2.40374	2.22144	2.3668	2.32339	2.20769	2.339	2.29617	2.28611	2.25056	2.6247	2.31981	2.40046	2.40655	2.56359	2.36966	2.46051
AKAP1	11747276_a_at	6.48322	4.07789	4.26311	3.86002	4.29575	5.91933	4.58266	4.8402	4.95089	5.31001	4.82799	5.74757	5.51157	5.06972	5.41207	5.54528	4.88328	5.06817	4.67199	5.17694	5.34609	5.25427	5.40606	5.10223	5.02246	4.98232	4.72142	5.34437	4.84396	5.08336	5.45633	5.00704	4.8745	5.44044	5.30703	4.61925	5.8672	5.16452	5.83337	5.17339
AKAP10	11739360_a_at	5.37323	4.7326	4.81749	4.38766	4.18694	4.60257	4.47138	5.8551	4.83196	5.56192	5.83764	5.36145	5.6512	5.10432	5.21209	5.23887	4.72285	5.31877	5.30497	5.44535	6.24736	5.41937	5.97243	5.47486	5.47054	5.02253	5.29288	5.74396	5.35923	5.53306	5.00359	5.49751	5.96477	5.22677	6.48781	5.59381	6.19761	5.57765	5.65811	4.54481
AKAP11	11763810_a_at	3.71388	3.27392	3.26965	3.43512	3.6102	3.73717	3.11573	3.55625	4.08909	3.9532	3.99002	4.14928	3.74326	3.49117	3.46209	3.75098	3.78722	3.38185	3.37523	3.32165	3.74134	3.6571	2.88034	3.21154	3.51051	3.51351	3.57829	3.64961	3.29842	3.47333	3.8055	3.45642	3.23453	3.9742	3.58218	3.31163	3.78722	3.13009	3.54675	4.08627
AKAP12	11723804_a_at	6.4535	2.29299	2.28307	2.37588	2.24725	2.35541	2.52317	2.93058	2.22798	4.49898	2.7996	2.22144	2.43785	2.14238	2.60492	2.55117	2.43541	2.38756	2.52039	4.56857	2.85904	3.73308	3.7369	4.25332	2.33382	1.83244	2.31506	3.35594	2.74684	3.00116	3.25105	2.53892	3.3466	2.94783	2.28458	3.8627	2.66204	4.76306	3.32896	2.25175
AKAP13	11761456_at	2.88024	3.64268	3.27983	3.73661	3.72911	3.31823	3.69507	3.58336	3.53054	3.41836	3.37425	3.18315	3.12547	3.08752	3.76559	3.1513	3.20248	3.20894	3.31925	3.283	3.25627	2.92317	3.40522	3.2672	3.38374	3.34413	3.14873	3.11246	3.51513	3.28429	3.21711	3.14998	3.15357	3.57488	3.25558	3.51276	3.22867	3.31544	3.13058	3.27544
AKAP14	11731323_a_at	1.91371	2.38047	2.40666	2.44297	2.48345	2.13285	2.11482	2.1998	2.26319	2.16335	1.9052	2.26307	1.97679	2.17249	2.06059	2.09726	2.30619	2.05977	2.2085	2.26812	2.42023	2.06899	2.12035	2.61171	2.28173	2.12192	2.40206	2.26023	2.24766	2.17433	2.19023	2.22533	2.1878	1.97173	2.05423	2.20761	2.13003	2.24294	1.9422	2.38081
AKAP17A	11759582_at	2.86786	3.64581	3.15654	3.22415	3.49207	3.17283	3.40488	3.05422	3.1349	2.93274	3.30697	3.05297	3.1154	3.02338	3.16497	3.16082	3.34313	3.14866	3.23133	3.19961	2.88578	3.20263	3.14852	3.09724	3.70528	3.50512	3.38879	2.95629	3.27935	3.05913	3.17283	3.15793	3.44747	2.88147	3.08708	3.35066	3.02169	3.30414	3.32896	3.12682
AKAP3	11727534_a_at	3.51092	4.60347	3.77609	4.48927	4.42218	4.09135	4.60012	3.98997	4.00746	3.89554	4.05577	3.7139	3.82875	4.02178	4.0425	3.75294	4.58334	3.95444	4.34545	3.78654	3.7659	3.96912	3.85928	4.05531	3.74978	4.01088	3.9491	3.73426	3.78003	3.88569	3.68029	3.68287	3.84874	4.05823	3.64821	3.88477	3.61561	3.84949	3.64131	4.37014
AKAP4	11755937_a_at	2.36224	2.95366	2.91642	3.04546	3.37352	2.89831	2.93717	2.96262	2.90728	2.55632	2.70895	2.49157	2.59601	3.04208	2.76625	2.89967	3.05109	2.79659	2.8693	2.58593	2.51818	2.68716	2.73761	2.7129	2.79789	2.95979	2.74271	2.45826	2.71478	2.68402	2.86502	2.83683	2.8693	2.70304	2.59512	2.71245	2.40716	2.96527	2.71519	2.90672
AKAP5	11729077_at	2.24495	2.29299	2.12281	2.54877	2.44963	2.22812	2.23228	2.15202	2.94392	2.4049	2.15085	2.22118	2.34323	2.40015	2.32634	2.08207	2.05334	2.32636	2.52786	2.38819	2.11132	2.37171	2.09185	2.54868	2.55313	2.64968	1.95548	2.50981	2.24588	2.17982	2.26027	2.09611	2.33436	2.45577	2.18793	2.53917	2.71344	2.45795	2.197	2.13958
AKAP6	11735053_s_at	1.91043	2.0329	2.00442	2.1782	2.07054	2.09334	2.27257	1.95652	1.84563	1.88864	1.61404	1.79745	1.75052	1.95138	1.90993	1.89171	1.99174	1.83509	1.77832	1.7615	1.69863	1.94216	1.82317	1.90091	1.91123	1.71029	2.08008	1.86112	1.93146	1.84644	1.47883	1.8097	1.86927	1.90311	1.82139	1.86927	1.78056	1.85915	1.83336	2.00899
AKAP7	11727738_a_at	2.44127	2.48883	2.50318	2.40261	3.01242	2.42386	2.78253	2.56939	3.37758	2.39038	2.51262	2.50545	2.63474	2.37334	2.48311	2.562	2.53724	2.80604	2.19185	2.61901	2.5097	2.75144	2.50996	2.5881	2.61895	2.31506	2.64494	2.54489	2.74214	2.47481	2.46286	2.6675	2.44598	2.62356	2.5491	2.46257	2.53387	2.59794	2.80055	2.3798
AKAP8	11762160_at	2.49787	3.283	3.12522	3.46454	2.85688	2.7806	3.09121	3.11362	2.70488	2.95505	2.91543	2.65252	2.84296	2.95927	3.10871	2.53868	2.78811	3.05162	3.04072	3.07393	2.51607	2.99571	3.3229	2.7129	3.04072	3.26137	3.05255	2.98393	3.02852	2.63835	3.01844	2.88052	3.19948	3.11458	2.69212	2.85669	2.98169	2.74684	2.55857	3.04555
AKAP8L	11730171_a_at	6.41763	6.08417	6.29983	6.34043	6.25835	6.83315	7.13782	6.53281	6.3248	5.94214	6.17808	6.9767	6.91733	6.26693	6.63419	6.20969	5.75478	6.22516	6.48928	6.45165	5.59139	6.37698	6.32859	6.27165	6.21066	6.23082	6.8009	6.4486	6.324	6.27027	6.67533	6.26827	6.007	6.2113	6.47395	6.07843	6.36136	6.16342	6.67824	6.11489
AKAP9	11762364_at	2.25653	2.27462	2.17521	2.39512	2.81743	2.07631	2.9777	1.95681	2.18896	2.22556	2.25343	2.03763	2.12004	2.32001	2.3129	2.17124	2.14628	2.11721	2.19202	2.22741	2.20007	2.28436	2.11954	2.40802	1.92378	2.21783	2.30776	2.33082	2.08202	1.98142	2.06057	2.27739	2.16558	2.19029	2.14048	1.86577	2.06532	2.13704	2.04225	2.13777
AKIP1	11760298_a_at	2.44834	3.17397	2.87238	3.09696	3.07702	2.60829	2.77248	2.70366	2.7235	2.69482	2.71877	2.25536	2.17493	2.67445	2.76276	2.7569	3.14197	2.97285	2.88331	2.76245	2.69133	2.74122	2.54705	2.67118	2.73381	2.70641	2.93311	2.70141	2.54697	2.83032	2.63263	2.59678	2.88415	2.36566	2.4423	2.70366	2.6363	2.47133	2.54469	2.74051
AKIRIN1	11758213_s_at	6.07597	5.23644	5.27548	4.88835	5.32022	5.65215	5.55928	6.27375	6.1747	6.44369	5.82785	5.28096	6.33619	5.91984	5.30061	5.36112	5.10448	5.74539	5.01614	6.04211	6.24174	5.42309	5.59921	5.97489	5.84219	5.76787	5.2888	5.91318	5.83077	6.20521	5.84022	5.75534	6.22824	5.54605	6.11859	5.71701	6.00104	5.69266	6.03268	5.09459
AKIRIN2	11726253_a_at	5.80166	6.65393	6.80243	6.64131	6.87957	6.23735	7.08329	7.1806	6.88499	6.55124	7.03511	5.97925	6.54443	6.56007	6.38642	6.50993	6.90316	6.59686	6.57698	6.27071	6.14375	6.46752	6.28212	6.21193	6.39885	6.56212	6.47647	6.28793	6.35309	6.38519	6.15353	6.42425	6.66027	6.21448	6.06977	6.63918	6.29892	6.47689	6.44154	6.79738
AKNA	11730934_at	3.42894	4.87853	4.85296	4.72433	4.47609	3.99865	4.66281	4.54409	5.22186	4.14916	4.71009	4.58708	4.8145	4.25714	4.6182	4.44199	4.27598	4.36881	4.67783	4.38849	4.72873	4.28553	4.27857	4.22571	4.39454	4.27916	4.64101	4.26713	4.39527	4.45812	4.60809	4.29048	4.39131	4.16637	4.09432	4.07526	3.92621	4.0707	4.26915	3.87163
AKNAD1	11740698_a_at	2.47471	2.84721	2.66703	2.58747	2.66347	3.04438	2.80422	2.47158	2.55841	2.53775	2.50727	2.41654	2.65414	2.554	2.54072	2.5238	2.56776	2.48848	2.52046	2.35907	2.24516	2.61942	2.30645	2.17572	2.30311	2.84965	2.34916	2.47147	2.45738	2.44511	2.53958	2.444	2.43476	2.40518	2.57629	2.34212	2.31144	2.41935	2.36053	2.56306
AKR1A1	11716509_a_at	8.57977	7.23261	6.63748	6.9754	7.21766	7.68104	6.67761	7.54804	7.04587	8.13036	7.73099	7.66942	8.07244	7.53691	7.38391	7.38919	7.39189	7.34208	7.17468	7.59049	7.69402	7.35658	7.9139	7.61741	7.94215	7.45633	7.36148	7.43862	7.5358	7.66432	7.72117	7.85393	7.53012	7.49431	7.70799	7.94357	8.18906	7.80507	7.73139	7.51641
AKR1B1	11715430_a_at	7.86572	8.36717	8.21681	8.47409	8.42845	9.14343	8.69166	8.32421	8.47194	8.18033	8.61698	8.95341	8.52292	8.30916	8.4943	8.6552	8.59038	8.61861	8.49123	8.63695	8.62163	8.77822	8.42761	8.31924	8.62187	8.54734	8.49914	8.58646	8.27873	8.53701	8.89274	8.55424	7.78703	8.66292	8.27798	8.15814	8.30376	8.49656	8.78102	8.45016
AKR1B10	11724490_x_at	2.3133	3.09578	2.91925	2.84239	2.88166	2.45406	3.11426	2.6231	2.51607	2.63033	2.472	2.22758	2.17659	2.57325	2.66919	2.37677	3.03234	2.72517	2.58378	2.78505	2.37539	2.84351	2.62883	2.7129	2.91867	2.75325	2.83388	2.94999	2.63313	2.55738	2.46283	2.54233	2.52304	2.53815	2.60735	2.80446	2.80446	2.62428	2.51096	2.91154
AKR1B15	11742379_x_at	3.96058	4.64478	4.24213	4.59481	4.71895	4.28618	5.18141	4.04105	4.12885	3.8178	4.06143	4.08187	3.5984	4.1907	4.15439	4.12562	4.399	4.10863	4.5546	4.13752	3.98112	4.3495	4.1021	3.85563	4.34027	4.32026	4.36017	4.20873	4.01128	4.07315	4.01083	4.16191	3.92152	4.03344	3.91467	4.16704	3.87334	3.81746	4.03076	4.72894
AKR1C1	11719171_a_at	2.87387	3.00068	3.4329	3.26794	3.61729	2.6189	3.45643	2.90017	3.01885	2.53603	2.56297	3.0628	2.45576	2.95927	2.7396	2.86792	3.15241	2.73128	3.07384	2.25007	2.45427	2.55311	2.7939	2.75129	2.5785	2.45837	2.64566	2.42958	2.67601	2.73517	2.60609	2.66918	2.69476	2.75113	3.13435	2.71941	2.18132	2.6672	2.52378	2.78708
AKR1C2	11738245_x_at	2.411	3.16959	2.90173	3.00351	2.77498	2.78809	3.15707	2.54198	2.78895	2.58275	2.988	2.41765	2.40345	2.63675	2.5393	2.6734	2.84872	2.41642	2.93371	2.6399	2.1032	2.55386	2.34902	2.4679	2.65828	2.89967	2.48452	2.44407	2.59686	2.44705	2.49479	2.58232	2.46331	2.59822	2.45647	2.77711	2.3146	2.67593	2.22183	2.56914
AKR1C3	11761156_at	2.66848	2.8949	2.91925	3.34853	3.19805	3.17614	2.9717	2.65642	3.40375	2.62893	2.82068	2.41564	3.15395	2.85832	2.91441	2.8107	2.94364	3.03585	2.527	2.7857	2.50512	2.89696	2.60688	2.64904	2.73525	3.05136	3.01879	3.03516	2.58705	2.82936	2.8308	2.76659	2.80382	2.99856	2.69665	2.82783	3.04782	3.02085	2.77898	2.69125
AKR1C4	11731677_at	2.17309	3.13061	2.40028	2.82416	2.93324	2.5777	3.13012	2.32301	2.39917	2.67535	2.4313	2.14567	2.40464	2.43541	2.59828	2.21407	3.05395	2.3576	2.64479	2.15918	2.34902	2.38038	2.56039	2.39946	2.31184	2.69674	2.47125	2.24789	2.23993	2.41744	2.43571	2.3182	2.48458	2.20366	2.49518	2.41165	2.15327	2.29528	2.32784	2.32731
AKR1D1	11735508_a_at	2.68941	3.3908	3.03089	3.32853	3.45736	2.81583	3.43727	2.76455	2.80337	2.92703	2.5135	2.825	2.68809	2.69588	2.67971	3.15309	3.18665	2.68718	3.03163	2.5597	2.61399	3.01494	3.10565	2.9941	3.09921	2.94909	2.97513	2.75226	2.73176	2.58681	2.72661	2.63331	2.75546	2.97751	2.78041	2.58549	2.6549	2.90721	2.67596	3.24092
AKR1E2	11753277_a_at	1.77379	2.30068	2.26041	2.8509	2.54447	2.21506	2.74017	2.46844	2.77412	2.29854	2.11912	2.36906	2.26878	2.40664	2.21045	2.19909	2.7198	2.25037	2.49551	2.16195	2.0665	2.40528	2.13882	2.35762	2.24118	2.31522	2.0904	2.10357	2.20534	2.21235	2.14824	2.2155	2.19042	2.47164	1.97553	2.07569	2.22623	2.08826	1.87166	2.32708
AKR7A2	11762339_x_at	4.97382	5.33067	4.55426	5.19876	5.02097	4.87634	5.2874	5.01078	5.14948	5.24768	5.20588	5.24313	4.73771	4.93521	5.16753	4.66396	5.03376	5.02338	5.02558	5.3259	4.74653	4.94559	5.01181	4.92042	5.03584	5.12402	4.97672	4.89412	4.98357	5.13827	4.91992	4.91055	4.99439	5.02614	4.99406	4.97181	4.87908	4.81575	4.91706	4.96177
AKR7A3	11729411_x_at	3.25651	3.54696	3.43364	3.68689	3.56963	3.38787	4.05555	3.53507	3.71245	3.09799	3.81	3.98869	3.13372	3.21875	3.42202	3.2537	3.71551	3.35037	3.31192	3.47747	3.08658	3.2647	3.30774	3.27245	2.928	3.43115	3.35867	2.98116	3.24318	3.27311	3.07398	3.11449	3.25651	3.38787	2.86587	3.18952	3.14838	3.4194	3.13278	3.33934
AKR7L	11735600_x_at	2.25957	2.47244	2.34688	2.42333	2.32701	2.308	2.44106	2.57432	1.90993	2.14207	2.33455	2.40132	2.11705	2.36587	2.48229	2.2378	2.31003	2.14733	2.2047	2.12192	2.58308	2.18755	2.43529	2.29193	1.97511	2.22144	2.35271	2.17451	2.29681	2.27756	2.16781	2.20332	2.19221	2.23237	2.19	2.2931	2.40975	2.20175	2.21115	2.08802
AKT1	11722187_a_at	3.88274	5.03327	4.96094	4.98873	5.14948	4.5677	4.90571	4.60803	5.04296	4.54039	4.73686	4.21561	4.38187	4.65082	4.66352	4.78749	4.77907	4.5201	4.56729	4.54747	4.31923	4.66206	4.66597	4.38134	4.42876	4.45002	4.77834	4.28684	4.61853	4.54515	4.86236	4.43416	4.62036	4.59038	4.47508	4.45553	4.12768	4.5099	4.43877	4.73124
AKT1S1	11754679_a_at	3.35511	4.32486	5.10432	4.39052	4.77405	4.80409	5.53969	4.0767	5.13908	4.22016	4.15422	3.67407	3.83653	3.48547	3.64608	3.48643	4.53263	3.83676	4.73883	3.53288	2.86136	3.81405	3.63988	3.55948	3.4454	3.99327	3.86966	3.80198	3.55607	3.75636	4.04347	3.59942	3.50026	3.80137	3.34929	3.64313	2.99195	3.68694	3.50771	4.44266
AKT2	11756698_a_at	2.49034	3.10403	3.51687	3.28619	3.29231	2.81188	3.95631	2.94183	2.63462	3.31442	2.76821	2.61024	2.47053	2.86556	2.81086	2.82927	3.25622	2.92458	3.23943	2.46079	2.57577	2.58834	2.73475	2.63198	2.69442	2.84253	2.93157	2.87224	2.77716	2.80719	2.82084	2.62388	3.00146	2.57064	2.95744	2.51653	2.78429	2.69982	2.75488	3.00772
AKT3	11758336_s_at	1.94879	2.24552	1.99016	2.24436	2.1948	2.28816	2.64975	2.25123	3.18112	2.28147	2.19579	2.35825	2.16287	2.0228	1.98759	2.22119	2.29067	2.27011	2.2416	2.24198	1.99604	2.28307	2.15188	2.1374	2.22706	2.10015	1.8914	2.41756	2.13875	2.17216	1.90298	1.96672	2.03527	2.09875	2.40238	2.05328	2.36226	1.98139	2.26411	2.01534
AKTIP	11760648_at	2.97507	3.5139	3.73703	4.00327	3.73623	3.35391	3.95752	3.21627	3.45763	3.30114	3.48155	3.14093	2.77763	3.35391	3.36387	3.1966	3.56462	3.22051	3.84569	3.02817	3.14569	3.09414	3.34321	3.29781	3.1237	3.66116	3.34243	3.32123	3.27369	3.24389	3.31953	3.27635	3.19362	3.47169	3.15245	3.24142	3.14569	3.38887	3.32896	3.28291
ALAD	11730200_a_at	5.21131	5.90426	6.38486	6.08516	6.05421	5.7028	7.39156	5.27886	5.74814	5.39324	5.11817	4.93165	5.29441	5.51373	5.38402	5.42548	5.98556	5.20661	5.84234	5.55141	4.70174	5.25084	5.36576	5.19139	5.3698	5.10583	5.25124	5.30479	5.11127	5.45124	5.47516	5.38735	4.99446	5.1038	4.95738	5.42329	5.03197	5.13443	5.12194	5.47917
ALAS1	11719329_x_at	7.30863	5.73408	5.77092	6.40745	5.51161	6.31109	5.20507	7.05907	5.46351	6.6178	7.20771	6.80971	6.7658	6.46677	7.03667	6.95176	5.77833	6.61132	6.37147	6.83471	7.3766	6.74201	7.03558	7.00416	6.90031	6.31783	6.89597	6.77937	6.89522	6.86526	6.68153	6.7584	7.11598	6.48953	7.19302	6.85219	7.06657	7.00405	6.63911	6.55571
ALAS2	11738208_a_at	11.2446	13.1585	12.502	12.7387	12.8981	12.3081	13.3083	12.1815	13.4212	13.0042	11.2349	10.1168	10.9095	12.1628	11.2037	11.0838	12.29	12.7273	12.8384	11.4506	10.5278	11.543	9.37004	11.5096	11.1634	12.1995	10.5578	11.333	12.2801	10.933	11.8161	12.0801	11.4995	11.6878	11.1422	12.2674	10.1137	11.9141	9.66149	12.7597
ALB	11747269_a_at	1.70312	2.35887	1.97401	1.97451	2.15275	1.96899	2.221	2.20115	2.34459	1.77178	1.97661	2.04028	2.17484	2.12895	1.8301	1.93141	1.76598	1.82051	2.23751	2.24716	2.06849	1.97109	1.73747	1.84618	1.75361	1.99242	2.12106	1.83437	2.03754	1.92152	1.79404	1.87367	1.71474	1.9296	1.73086	1.90756	1.7748	1.73687	1.99676	2.08146
ALCAM	11745050_a_at	3.22462	2.23974	2.11757	2.12144	2.0035	2.37106	1.88995	1.9386	2.16981	2.38862	2.64637	1.74536	2.28511	2.27589	2.10063	2.13974	1.88069	2.07771	2.14456	2.1675	1.82046	2.46587	2.32926	2.16741	2.18256	2.1269	1.93489	2.25956	2.0042	2.23339	2.09455	1.93088	2.09254	2.12782	2.12619	2.15027	2.33299	2.31727	2.04714	2.3272
ALDH16A1	11724313_a_at	6.77779	6.38382	5.51333	5.74925	6.12297	6.66873	6.0088	6.60036	5.88611	6.33388	6.62749	6.86357	6.50399	6.37945	6.50967	6.63256	6.44141	6.45483	6.41084	6.50851	6.25682	6.64492	6.51009	6.49147	6.52825	6.40799	6.37842	6.45401	6.46162	6.52297	6.99987	6.34461	6.28847	6.52944	6.50486	6.2596	6.2616	6.38382	6.54442	6.42366
ALDH18A1	11748467_a_at	7.02916	5.56011	4.80442	5.51157	5.62809	6.87733	5.48163	6.03024	6.17844	5.13164	5.82078	6.36174	6.11408	5.52133	5.90623	5.95757	5.52517	5.89254	5.76515	6.02077	5.75408	5.88281	5.62585	5.49929	5.94044	6.09584	5.54421	6.05898	5.98456	5.63055	5.94199	5.83171	5.21831	5.86035	5.76891	5.45152	6.13525	5.56979	6.20824	5.61459
ALDH1A1	11743044_a_at	5.89399	3.74943	3.62861	3.19379	4.04451	2.9129	3.12618	5.19212	4.44956	7.29454	6.03621	4.36618	5.75399	5.86842	5.46712	4.78749	5.18294	5.04661	4.84765	5.06318	6.56484	5.23532	6.57977	6.00573	6.66861	5.53694	5.67938	4.65939	5.21267	5.73933	5.02568	6.09801	5.50981	4.7207	5.71702	5.11103	6.56497	7.21691	4.95595	4.63238
ALDH1A2	11724232_s_at	2.0491	2.12823	2.17906	2.33736	2.41006	1.93857	2.21556	2.55322	2.08551	2.01015	2.10661	1.70148	2.13212	2.05301	2.11705	2.24357	2.13834	1.93473	2.23153	2.24949	2.2852	2.37765	2.11997	2.42961	2.02471	2.07524	2.22482	2.00249	2.09168	2.10688	1.96955	1.96215	2.31162	2.59701	2.19383	2.17561	2.01672	2.25225	1.9676	2.10461
ALDH1A3	11750101_a_at	1.96612	2.29299	2.35161	2.72723	2.21087	2.42151	2.34587	2.29923	2.74712	2.34763	2.14766	1.88832	1.76598	2.38288	2.32634	2.14983	2.23382	2.47373	2.31817	2.04318	1.95548	2.27647	2.28299	1.93538	2.08233	2.26596	2.24991	2.13539	2.0902	2.00319	2.21786	1.93203	2.33016	2.35244	2.38466	2.28717	2.1798	1.93538	2.3798	2.55254
ALDH1B1	11746588_a_at	5.00573	5.04707	4.80823	4.89109	4.92286	4.5486	4.93076	4.64889	4.81802	4.83155	4.69919	4.88036	4.76935	5.05094	5.02067	5.07834	4.8831	5.03081	4.75231	4.87524	4.82523	4.9274	5.01227	4.99064	4.7977	4.77388	4.84638	5.17042	4.65048	4.67697	4.87108	4.46913	4.64809	4.94428	4.83991	4.74386	4.63992	4.77067	4.74801	4.68318
ALDH1L1	11756274_a_at	2.68326	3.03361	2.91925	4.05771	2.86226	2.70207	3.42613	2.891	3.18099	2.60179	2.62445	2.86934	2.73437	2.84615	2.67498	2.8584	2.97246	2.78064	2.91034	3.00716	2.7542	2.7303	2.59488	2.76648	2.57996	2.56854	2.65443	2.47569	2.5984	2.58174	2.61643	2.92007	2.662	2.89539	2.6189	2.36683	2.54179	2.5018	2.60179	2.73437
ALDH1L2	11740521_a_at	2.20727	2.69297	2.14736	2.0613	2.84774	2.31934	2.36325	2.04799	3.13409	2.2344	2.36595	2.56078	2.46024	2.48332	2.34501	2.58606	2.40865	2.35226	2.5511	2.26812	2.5146	2.47633	2.15737	2.20359	2.42762	2.51334	2.31506	2.19445	2.38983	2.24786	2.36602	2.45724	2.39583	2.34474	2.45088	2.41565	2.27242	2.30037	2.36602	2.35299
ALDH2	11746896_a_at	7.38192	6.7847	6.36962	6.42551	6.44917	4.56266	5.42398	7.51676	6.62892	8.23637	7.93746	7.18287	8.23717	7.58539	7.71648	7.32324	7.17617	7.27465	7.34645	7.64564	7.66228	7.20061	8.11712	8.33593	8.27346	7.47594	8.29734	6.60627	7.43221	7.81934	7.8195	7.64335	8.15048	7.04944	8.19362	8.02183	7.97931	9.04103	7.0725	7.30736
ALDH3A1	11726360_a_at	4.04856	4.53807	4.45762	4.05582	4.28668	4.09211	4.45043	3.58299	3.98609	3.94425	3.73074	3.74416	4.09737	4.32858	4.21451	4.31199	4.17754	4.09737	4.25983	3.94141	3.65376	4.05615	3.98746	3.95148	3.98822	4.09631	4.09014	4.3104	3.93395	3.98899	3.99868	4.00178	3.98083	3.89682	3.70414	3.93402	3.98746	4.01591	4.22795	4.2846
ALDH3A2	11756679_a_at	5.14337	5.24587	5.04558	5.26749	5.14948	5.10452	4.40099	5.47034	4.56324	6.00676	5.89722	5.54718	5.6892	5.45519	5.78949	5.31101	5.00616	5.15252	5.06517	5.4294	5.68938	5.51845	5.58039	5.45128	5.46447	5.20222	5.22907	5.21555	5.37549	5.39766	5.48941	5.41987	5.44125	5.40513	5.27827	5.75291	5.75277	5.66832	5.82816	5.20409
ALDH3B1	11741146_x_at	5.54347	5.87325	6.24399	6.24498	6.27261	5.7054	6.20055	6.11687	5.90751	5.87227	6.04772	5.88835	5.59772	6.06706	6.2404	6.07487	6.00611	5.72685	6.12631	6.07931	5.68079	5.88934	6.25691	6.19537	5.91204	5.8416	6.28486	5.73555	5.94977	6.11107	6.11071	6.09976	6.13894	5.94563	6.17078	6.38102	6.37068	6.18322	5.80862	6.26645
ALDH3B2	11727501_a_at	2.81371	3.49652	3.49859	3.47857	3.45867	3.01575	3.95116	3.00663	3.24458	3.12849	2.99835	3.20487	2.91219	3.35391	3.04546	3.21564	3.7734	3.11263	3.5051	2.84884	2.81151	3.20263	3.02295	3.2238	3.01534	3.06379	3.21273	3.06969	3.21107	3.10137	3.30856	3.1494	3.16092	3.54602	3.14057	2.98112	2.71879	2.9327	3.01241	3.4817
ALDH4A1	11755618_a_at	5.89379	4.3736	4.63891	4.83524	4.38317	4.62171	4.77268	4.71596	4.36592	4.88577	4.94227	4.69775	4.69964	4.56558	4.90468	4.57095	4.37761	4.52216	4.22096	4.67433	4.85211	4.66301	4.78174	4.66174	4.80366	4.16967	4.39218	4.58742	4.5147	4.49715	4.97159	4.69988	4.71724	4.46952	4.8689	5.03416	4.87186	4.94619	4.53565	4.15416
ALDH5A1	11736619_a_at	4.43875	5.43951	5.57044	4.68304	5.45517	4.84157	6.31374	4.28484	4.21341	3.3697	3.75806	3.38736	2.82396	3.7304	3.29708	3.28999	4.59846	3.8342	3.56922	3.27584	2.91529	3.50662	2.99377	3.36085	3.0343	3.74982	3.42128	3.04929	3.11397	3.13543	3.20145	3.38963	3.13478	3.47374	2.81068	3.21402	2.67078	2.87583	2.56207	3.73583
ALDH6A1	11722998_a_at	5.31247	4.58389	4.62231	3.9434	4.54273	5.0599	4.29823	3.97838	4.02366	4.77226	4.45793	4.41203	4.47612	4.50892	4.46754	4.69766	4.55212	4.43581	4.23815	4.12807	4.18518	4.65578	4.35834	4.70519	4.35863	4.52011	4.52564	4.93653	4.33953	4.42091	4.46696	4.60954	4.27209	4.31837	4.20983	4.47307	4.63558	4.544	4.84786	4.77243
ALDH7A1	11752503_x_at	2.17682	2.3404	2.09563	1.76525	1.78567	1.85915	2.22401	1.81527	1.74489	1.84319	1.72278	1.61828	1.78672	1.87369	1.92243	1.94226	2.06271	1.98804	1.90468	1.78886	1.93601	2.0996	1.80013	1.65949	1.71988	1.91096	1.68556	1.53694	1.69631	1.75935	1.94334	1.8643	1.78864	1.72183	1.72278	1.75019	1.44167	1.68161	1.72982	1.86722
ALDH8A1	11727975_a_at	3.76551	3.58826	3.56268	3.73284	3.41035	2.94756	3.69127	3.06104	3.15673	2.97789	3.0182	3.08997	3.09299	3.18279	3.56174	3.42179	3.38161	3.30075	3.44985	2.92681	3.1283	3.34708	3.3229	3.25396	3.09936	3.35536	3.45368	3.11639	3.2867	3.40949	3.30982	3.17159	3.40385	3.21691	3.11714	3.2256	3.02183	2.89077	3.20866	3.29381
ALDH9A1	11760533_x_at	5.10473	4.72182	4.71807	4.79254	4.87859	4.8634	4.80667	5.61522	4.95285	5.23843	5.53597	5.21782	5.39513	5.08918	5.42314	5.31933	5.08642	5.42813	5.33573	5.10772	5.70018	5.27268	5.23789	5.55167	5.48052	5.50471	5.02945	5.38718	5.38205	5.39965	5.12266	4.94559	5.31903	5.28875	5.41028	5.38483	5.42001	5.15229	5.17715	5.00856
ALDOA	11745964_x_at	10.3187	9.41881	9.70852	9.94766	9.18542	10.1075	9.1979	10.7786	9.59317	10.2705	10.6516	10.9251	10.6428	10.1522	10.7441	10.4268	9.68826	10.2446	10.2532	10.2195	10.6296	10.4787	10.6248	10.6153	10.5701	10.3654	10.5966	10.3863	10.5954	10.4474	10.8572	10.3148	10.4233	10.3969	10.5065	10.2539	10.7609	10.6176	10.4877	10.2105
ALDOB	11739163_a_at	1.77053	2.36106	1.88749	2.01056	1.85062	1.84332	2.02523	1.9402	1.7294	1.86301	1.79537	1.97949	1.80495	1.90997	1.77779	1.7499	1.6486	1.66654	1.9032	1.93006	1.77546	1.99943	2.07535	1.70696	1.96562	1.84825	2.10304	1.69872	1.8811	1.84251	1.97931	1.90859	1.88084	1.99119	1.78424	1.77597	1.89706	1.88291	1.87332	1.95531
ALDOC	11724461_a_at	5.09377	4.2626	5.48397	4.28466	4.90968	4.57097	4.90226	4.5348	3.91097	4.83022	4.49598	5.14101	4.90432	4.9573	5.28476	5.67854	4.98616	5.26928	5.16399	5.14039	4.63939	5.20967	5.39076	5.09833	4.96414	4.8963	4.95787	4.9867	4.99081	5.09605	5.31225	4.76403	4.66159	5.31426	4.7798	4.46783	5.36053	4.6941	5.72073	4.90575
ALG1	11728198_at	3.19108	3.43117	3.20058	3.62379	3.44043	3.50338	3.58446	3.80774	4.01634	3.43119	3.203	3.59352	3.68723	3.57832	3.28599	3.18517	3.55919	3.41663	3.04047	3.53437	3.87067	3.50825	3.00045	3.01742	2.96908	3.30444	2.90428	3.4853	3.47744	3.19067	4.04487	3.44313	3.18344	3.83219	2.98316	3.38381	3.06502	3.07629	3.11658	3.30713
ALG10B	11727293_x_at	5.864	3.6104	3.43253	2.97325	3.62101	5.27459	2.88238	3.67174	3.80097	4.47279	3.72437	3.98836	5.11162	3.74847	3.73811	3.96648	3.36656	4.31291	3.5557	4.44692	4.80503	4.06815	4.01144	3.99468	4.58369	3.95755	3.85069	4.67993	3.69292	3.91044	3.51787	4.53079	3.9349	4.40476	4.44162	4.14124	5.00297	4.65876	4.83035	3.4827
ALG12	11735729_a_at	3.7999	4.12528	3.8788	4.08291	4.29586	3.95367	4.31734	4.45976	3.55458	3.88689	4.10188	4.48069	4.54817	3.76668	4.28086	3.96523	3.67855	3.95694	3.63741	4.02131	4.03714	3.96912	4.10417	4.00378	4.06991	4.04777	4.07574	4.01854	4.31781	4.05074	4.29339	3.8377	3.94687	4.08801	4.09805	3.83921	4.49315	3.94485	4.13527	4.06215
ALG13	11761979_a_at	4.8277	4.39503	4.47478	4.05751	4.62463	5.08489	4.77874	4.37284	4.87789	4.36601	4.83961	5.15095	4.99596	4.25801	4.11182	4.56414	4.08922	4.84498	4.71424	4.93316	4.69827	4.83896	4.26435	4.60959	4.88087	4.46119	4.36134	5.22253	4.75869	4.88422	4.33769	4.93281	4.34956	5.2064	4.88414	4.93341	5.33178	4.53822	5.88806	4.17706
ALG14	11743909_at	4.87355	4.39669	4.60452	4.13596	4.28474	4.5329	4.16216	4.19609	4.12865	4.9284	5.85359	4.6782	5.15892	4.78619	4.44903	4.28749	4.25512	4.2299	4.04024	4.54605	4.54432	4.75453	4.61095	4.51446	4.82529	4.62715	4.19261	4.40986	4.50417	4.48796	4.93534	4.65907	4.46463	4.69253	4.44801	4.53228	4.83569	5.37702	4.57643	4.33605
ALG1L	11715269_x_at	3.1759	2.77475	3.38351	3.26185	3.5516	2.8941	3.62576	2.8711	2.85521	2.74592	2.83814	3.00511	2.65414	2.81099	3.04497	2.58896	3.07883	2.89635	2.96727	2.87195	2.92142	2.71792	2.77436	2.87453	2.63985	2.80487	3.10471	2.41596	2.94634	2.76975	3.07124	2.6292	2.94795	2.89967	2.93793	2.97184	2.89555	2.91216	2.79389	3.3546
ALG1L2	11741787_x_at	3.25635	3.87543	3.40894	3.529	3.68871	3.17953	3.81591	3.42969	3.76718	3.20658	3.07226	3.28205	2.99539	3.16587	3.21633	3.30654	3.42493	3.5478	3.19305	3.16299	3.27166	3.56172	3.2865	3.3028	2.99801	3.28563	3.41563	3.19995	3.25921	3.29704	3.29194	3.16353	3.21266	3.38654	3.20017	3.51284	3.28318	3.21256	3.062	3.53546
ALG2	11724755_at	5.12792	3.4753	3.34288	3.78349	3.5302	3.95224	3.25813	3.68578	3.72165	4.59574	4.10536	4.10987	4.14168	3.95623	3.79763	3.58221	3.59224	4.02437	3.34291	4.28729	3.77283	4.39048	4.5112	4.12165	4.14168	3.7469	3.29345	4.2235	3.98339	4.06611	4.13849	4.27875	3.79486	3.73238	4.1635	3.99807	4.46929	4.2231	4.17796	3.29626
ALG3	11749588_a_at	6.16287	6.33009	6.05058	6.52393	6.25426	6.96504	6.54951	6.83822	6.44317	6.47037	6.81557	6.98888	6.53667	6.33887	6.46256	6.48343	6.25715	6.42109	6.2501	6.51179	6.44043	6.49228	6.64093	5.97311	6.49998	6.48235	6.19318	6.22664	6.42005	6.55017	6.9102	6.51838	6.35201	6.81083	6.0904	6.67055	6.36842	6.64435	6.44369	6.77034
ALG5	11757588_a_at	7.70868	5.98014	6.221	5.69129	5.86562	6.92561	5.2566	6.43663	6.36777	7.05425	7.18268	7.03536	7.54048	6.89344	6.26332	6.38032	5.72353	6.55644	5.90777	6.90035	6.76468	6.54797	6.93149	6.62279	6.85674	6.58009	6.50838	6.83943	6.67305	6.71572	6.53221	7.18662	6.47793	6.77791	6.89999	6.97733	7.33228	7.22271	7.10349	6.23411
ALG6	11751023_a_at	2.55697	2.43816	2.46985	2.37661	2.21457	2.55363	2.29203	2.67779	2.52181	2.5484	2.43144	2.49901	3.29649	2.45174	2.23631	2.47807	2.2846	2.65297	2.42499	2.43938	2.5842	2.85066	2.63462	2.27137	2.85415	2.63196	2.43645	2.68973	2.48665	2.34974	2.32151	2.80687	2.43816	2.53603	2.39335	2.43883	2.57109	2.58843	2.447	2.8029
ALG8	11732176_a_at	5.8528	4.76341	4.68256	5.28181	5.19099	6.00361	4.4369	5.88258	5.15883	5.67952	6.21218	6.1277	6.27026	5.43889	5.57994	5.73111	5.17565	5.67879	5.42717	6.11648	5.98205	6.04505	5.7481	5.59091	6.14302	5.71652	5.52757	5.50855	5.69895	5.96191	6.08129	6.13072	5.36915	5.99391	5.5515	5.88609	6.12979	6.0673	6.09505	5.42717
ALG9	11726401_a_at	3.65062	2.82924	2.74165	2.91725	2.83742	3.12051	3.00579	2.85362	2.72431	2.83543	3.00112	3.06611	2.90398	3.01419	2.87223	3.14172	2.57204	3.07214	2.82545	3.24147	3.13733	3.17184	3.05281	2.95162	3.10641	2.71248	2.86556	3.11635	3.16949	3.09729	2.99985	2.77513	3.03974	2.9896	2.96405	2.96563	3.36615	3.12728	3.65485	3.24092
ALK	11750678_a_at	3.26167	3.80481	3.7385	3.97897	3.92447	3.50773	3.81872	3.54886	3.46303	3.44674	3.27941	3.76559	3.32146	3.51469	3.5844	3.72531	3.92556	3.40643	3.55672	3.40718	3.40851	3.49651	3.51704	3.49773	3.4817	3.66886	3.63423	3.46043	3.43126	3.62389	3.56024	3.38917	3.47381	3.5663	3.31662	3.46116	3.69974	3.49413	3.39241	3.72709
ALKBH1	11725834_at	3.76132	3.6104	3.53003	3.92935	3.82981	3.94636	3.93431	3.96444	3.88603	3.52233	3.58182	3.5244	3.44277	3.57176	3.77898	3.69133	3.81562	3.91513	3.25738	3.66851	3.72323	3.80145	3.73429	3.79235	3.69981	3.668	3.76699	4.00842	3.55672	3.53457	3.65377	3.82938	3.71829	3.90149	3.77202	3.76057	3.84856	3.73702	3.76132	3.65431
ALKBH2	11750069_x_at	5.43213	5.34509	5.27548	5.09699	4.87894	5.19958	5.41414	4.61909	5.42835	5.07855	4.82938	4.92732	4.54706	4.83796	4.75357	4.80329	5.03429	4.84851	5.00978	4.79188	4.51335	4.85462	4.95268	4.62406	4.77597	4.64414	4.62777	4.87112	4.8367	4.9805	4.61275	4.84643	4.69378	5.10857	4.59458	4.63734	4.39021	4.84387	5.1799	4.64478
ALKBH3	11720979_a_at	6.29638	4.84485	4.8256	4.84566	5.29436	5.29403	4.9999	4.66349	5.25925	5.09864	4.83767	5.076	5.41516	4.75471	5.09004	5.05619	4.76971	5.0185	4.43604	5.00549	5.10874	4.95338	5.55726	5.13892	5.26873	4.90777	4.80528	5.17946	4.87969	5.16011	5.20372	5.36473	4.95099	4.969	4.99829	5.1812	5.58414	5.1854	5.41711	5.22899
ALKBH4	11739465_x_at	4.61221	5.04736	4.81075	5.39457	4.97759	5.08456	5.35856	5.14337	5.26197	5.1882	4.87852	5.12481	4.96962	5.08037	5.14521	4.97726	5.26335	5.00839	5.08961	4.91542	4.64276	4.9845	4.77419	4.58922	5.26803	4.99383	5.12594	4.7686	4.73729	4.99248	4.93725	4.85548	4.76265	5.0385	4.45457	4.869	4.91546	4.75711	4.73073	5.24799
ALKBH5	11719043_x_at	4.23353	5.32061	5.05641	5.30652	5.33134	4.6907	5.68346	4.67556	5.13594	4.93631	4.50891	4.54634	4.46669	4.70097	4.68644	4.58383	5.1409	4.61667	5.14477	4.63762	4.3225	4.76255	4.58114	4.53234	4.61472	4.69347	4.62418	4.5079	4.53986	4.80635	4.89881	4.65752	4.7137	4.91613	4.28239	4.73166	4.03177	4.32752	4.2423	5.28921
ALKBH6	11746157_a_at	4.8663	5.80242	5.12388	5.10556	5.3775	4.96969	5.80372	5.34944	5.11856	5.06132	5.23872	5.30947	5.40521	4.7397	5.28863	4.89899	5.00616	5.0896	5.2283	5.20885	4.15656	5.16382	4.84134	4.99836	5.40253	5.23782	5.48057	5.37511	5.16142	5.10234	5.45503	5.16865	5.20878	5.21215	5.0607	5.41336	5.03274	5.18382	5.4196	5.3278
ALKBH7	11743955_at	3.11788	4.39266	4.37878	4.48426	3.98989	3.92927	4.69061	3.38768	3.8135	3.72486	3.37426	3.31704	2.79174	3.66869	3.71555	3.59611	4.10313	3.71735	4.03267	3.62298	3.38958	3.66438	3.83052	3.33193	3.61466	3.6687	3.6643	3.45349	3.47296	3.62042	3.41639	3.61633	3.55271	3.70792	3.50402	3.35635	2.94191	3.76335	3.20387	4.02707
ALKBH8	11727628_x_at	3.335	2.61312	2.40411	2.48824	2.60875	2.60672	2.578	2.35792	2.71575	2.89922	2.62301	2.74684	3.78572	2.92682	2.55416	2.53174	2.44943	2.86688	2.71023	3.09801	3.08469	2.98975	2.65938	2.72008	2.78845	2.50835	2.48112	2.99465	2.65621	2.70982	3.03215	2.80107	2.83629	3.29835	2.69463	2.55213	3.14043	2.7719	3.03367	2.62857
ALLC	11728598_a_at	3.46104	4.27699	3.9086	4.30595	4.11883	3.4475	4.05851	3.72855	3.80295	2.89967	3.7413	3.13746	3.27446	3.39335	3.56705	3.91091	3.63146	3.43415	3.86274	3.46104	3.50964	3.64982	3.71439	3.16989	3.21543	3.6276	3.74633	3.6039	3.09961	3.67237	3.54102	3.59813	3.26386	3.84837	3.29604	3.57245	3.31295	3.25731	3.1253	3.74362
ALMS1	11743631_a_at	4.84292	4.94234	4.62631	4.93809	4.96266	4.68593	4.52099	4.35513	4.6754	4.42774	4.55152	4.29345	4.65992	4.41283	4.56605	4.53802	4.66465	4.60975	4.65401	4.51341	4.46924	4.63258	4.39449	4.41002	4.6233	4.4343	4.55814	4.6008	4.25135	4.31664	4.65019	4.50734	4.1922	4.41247	4.23574	4.34751	4.60037	4.41277	4.72568	4.68126
ALOX12	11741457_a_at	2.57322	3.50957	3.18733	5.39408	3.60535	3.61248	3.71024	3.34837	2.59979	4.29469	3.75806	3.73506	3.83573	3.95175	4.91554	4.56356	3.6703	4.54903	5.67923	3.50574	4.6427	4.19248	4.77203	3.51051	3.43111	4.30452	3.89119	4.12939	4.11867	3.76808	3.97691	3.61929	4.21088	4.51147	3.43431	3.77333	3.10525	3.93732	3.3093	3.70752
ALOX12B	11740549_at	2.74248	3.17205	3.16568	3.11556	3.53496	2.92841	3.11671	2.89889	3.20947	2.82823	2.90767	2.83251	2.73437	3.10923	2.85816	3.04377	3.16853	3.03128	3.10215	2.75089	3.15315	3.08213	2.85567	2.77792	2.93757	2.97343	3.16228	2.7854	3.03805	2.82508	2.79438	2.73541	2.98855	2.90746	2.44346	2.85931	2.69207	2.65927	2.51759	3.06074
ALOX15	11734503_x_at	3.93862	4.54309	5.03705	4.56396	5.06268	4.36709	5.08347	4.40802	4.25735	4.17015	3.94361	4.0162	4.00188	4.50239	4.82548	4.44272	4.95758	4.53233	4.88212	4.55398	4.25493	4.62294	4.36367	4.49302	4.28609	4.66332	4.49302	4.51859	4.47236	4.46374	4.04845	4.33213	4.29446	4.70062	3.67702	4.73319	4.30204	4.12468	4.27806	4.8254
ALOX15B	11752283_a_at	2.45858	4.16503	3.17321	3.49966	3.48331	2.83778	2.88503	2.44339	2.75736	2.75129	2.54587	2.46738	2.53474	2.76085	2.59039	2.86142	3.07165	2.8143	3.20539	2.77837	2.19155	2.44314	2.6048	2.76564	2.65324	2.43776	3.69228	2.40576	2.84038	2.80727	2.78318	2.7203	2.94866	2.82116	3.14898	2.61838	2.5766	2.89809	2.82663	2.88693
ALOX5	11726338_a_at	8.00775	7.59042	7.23829	7.26057	6.10939	5.48311	5.82707	8.01895	7.02645	7.27971	8.08995	7.02355	7.82502	7.22749	8.12543	7.72484	6.60784	7.68097	7.66208	7.32121	8.15719	7.48189	8.00398	8.28856	7.37405	7.50889	8.63024	7.54851	8.07409	7.69171	7.15628	6.92747	8.43843	7.10982	8.43044	7.47556	8.13751	7.66411	7.37974	7.20372
ALOX5AP	11719479_at	10.1355	10.4351	10.432	10.1989	9.1387	8.53883	8.88851	11.1406	10.0383	10.5313	10.1317	10.8822	10.1519	10.2712	10.8156	10.9171	9.73407	10.5294	10.6875	10.877	11.5154	10.66	10.8866	10.7296	10.7184	10.5639	11.1691	10.8934	11.4825	10.5934	10.012	10.1976	12.1335	10.4376	11.3592	10.5064	10.994	10.9859	11.057	10.0874
ALOXE3	11732766_a_at	2.92431	3.45302	3.42625	3.94145	3.47229	2.83164	3.70134	3.09009	3.25465	2.81717	3.10452	3.22428	2.9954	3.23454	3.06636	2.95906	2.98371	3.44112	3.46857	2.91998	2.97212	2.88688	2.89783	2.85166	3.01696	3.24611	3.2016	3.19731	3.05088	3.09417	3.25866	3.07911	2.92384	3.45189	2.96953	2.81897	2.76717	2.94377	2.8598	3.10932
ALPI	11732474_at	2.89143	4.28605	3.93742	4.46442	4.50417	3.65129	4.81261	3.32202	3.44506	3.47294	3.26039	2.85035	3.35829	3.82707	3.50561	3.71408	4.46817	3.51862	4.14616	3.75317	2.59436	3.51162	3.29794	3.27062	3.68856	3.60458	3.39502	3.33151	3.57727	3.65704	3.58699	3.60027	3.31212	3.59293	3.26777	3.78045	2.74898	3.35155	3.28208	4.09869
ALPK1	11750489_a_at	3.65258	4.79683	4.39476	3.85994	4.25989	3.58977	4.07455	4.12881	4.30547	3.82984	4.02131	4.12346	3.76045	4.39277	4.3748	3.78413	4.43097	4.22585	4.03997	3.73637	4.31482	3.51935	4.0978	4.30792	3.87634	4.09805	4.33807	3.94913	4.02521	3.92625	3.96725	3.76966	4.69684	3.88056	5.11719	4.2092	4.19758	3.94753	3.76577	4.24685
ALPK2	11723399_at	3.67225	4.18376	4.21246	4.36881	4.69396	3.633	4.38627	3.65323	4.0928	3.68447	4.11267	3.82848	3.55014	3.98063	3.89148	4.12562	3.81547	3.65833	4.37048	3.47377	3.49816	3.92465	3.68224	3.77211	3.90251	3.79962	4.314	3.53464	4.01249	3.89892	4.09134	3.92434	3.61169	3.52499	3.87449	3.50998	3.41795	3.8404	3.73599	4.0853
ALPK3	11723392_a_at	3.33839	4.08739	3.71388	4.18518	4.1388	3.39725	4.21513	4.00028	3.48897	3.15268	3.29578	3.71943	3.51805	3.72911	3.73305	3.60923	3.85896	3.90482	4.10981	3.67828	3.47829	3.46205	3.52902	3.67089	3.74609	3.69577	3.62497	3.78029	3.59414	3.97506	3.89021	3.6884	3.7236	3.98862	3.62253	3.6056	3.11783	3.31246	3.37417	4.08865
ALPL	11750919_a_at	4.15811	6.28276	6.43377	5.73052	5.22541	4.84496	5.2851	5.38871	5.89239	4.75681	5.49401	4.82939	4.79399	5.25636	5.97593	5.41509	5.50068	6.15467	5.86059	5.20968	5.82836	5.35204	5.7573	6.26619	4.7223	5.38054	6.63796	4.69795	6.40568	5.45917	5.4743	4.97589	6.366	4.45851	6.02432	4.72014	4.52362	5.09706	4.62802	5.17106
ALPP	11752432_s_at	3.2422	4.41324	4.45956	4.36881	4.66752	4.20682	5.14161	4.36023	4.58368	3.80381	3.98741	3.73125	3.74787	4.23652	4.04646	4.13354	4.70019	4.31329	4.47816	4.02131	3.6934	4.24296	4.09262	3.82621	3.96818	4.14289	4.04369	4.12129	3.79272	4.03638	4.08877	4.09261	4.08754	4.22829	3.93987	4.01725	3.67144	3.82766	3.40691	4.33348
ALS2	11761970_at	2.03365	1.93169	1.74473	2.11776	2.0546	2.076	2.18134	2.29136	1.99713	2.05881	2.04923	2.24234	2.01396	2.06797	2.06797	2.08228	2.07787	2.17725	2.02138	2.1206	2.1935	1.92303	1.94273	2.06647	1.89506	1.92461	2.22827	1.92976	2.16845	1.95241	1.92589	1.96696	2.00646	2.13937	1.83183	1.97054	2.19629	2.07381	2.10919	2.04442
ALS2CL	11754683_x_at	3.61793	3.65741	3.20319	3.9614	3.24399	3.04593	4.46463	3.95057	3.43235	3.31206	3.98045	3.31206	3.29874	3.45604	3.51705	3.30957	4.07895	3.46076	3.42772	3.18051	3.46644	3.41561	3.42396	3.54055	3.22371	3.49876	3.48736	3.42182	3.03424	3.37035	3.59423	3.38085	3.3693	3.95598	2.9169	3.31279	2.82107	3.31412	3.38917	3.51303
ALS2CR12	11737244_a_at	2.3651	3.33982	3.68372	3.55354	3.15271	3.10341	3.48296	2.51627	3.12033	2.70075	2.65804	2.58814	2.53724	3.07236	2.60408	2.70075	3.32224	2.63462	2.80245	2.73382	2.34168	2.83621	2.64832	2.60362	2.53545	2.88961	2.5844	2.40283	2.74684	2.58549	2.54344	2.64036	2.50556	2.57961	2.36929	2.76273	2.45161	2.46773	2.57162	2.78287
ALX1	11731229_at	3.52821	4.08284	4.32824	4.62183	4.60749	4.0984	4.50448	3.82459	3.86451	4.05262	3.71567	3.51386	3.8045	4.18152	4.16545	4.12425	4.53773	4.07773	4.11499	3.9048	3.64564	3.8882	3.89505	3.90449	4.10368	3.93124	4.32321	3.9058	4.14371	4.16198	3.83113	4.09217	3.84761	3.82329	3.90972	4.13888	3.87622	4.44022	4.11439	4.22037
ALX3	11735817_at	2.4324	3.31259	3.2449	3.23072	3.18778	2.88943	3.92478	2.92846	3.06032	2.73905	2.60606	2.6662	2.46788	3.01938	3.13833	2.90128	3.60224	3.02036	3.19074	2.60978	2.52964	2.91714	2.9672	2.96168	2.80222	3.0376	2.95382	2.75119	2.91912	2.95497	3.12059	3.04996	3.09699	2.94207	2.63983	3.09184	2.54712	3.07316	2.80261	2.75407
ALX4	11737584_a_at	4.23588	5.00577	4.80605	5.16806	5.15024	4.73607	5.39222	4.38994	5.02617	4.55138	4.54331	4.51899	4.26911	4.71791	4.77994	4.76368	5.29123	4.61674	5.04148	4.4115	4.02566	4.7692	4.67332	4.54245	4.72062	4.61696	4.77834	4.63694	4.74833	4.69618	4.71461	4.72516	4.61971	4.66882	4.60788	4.75214	4.40482	4.54798	4.42595	4.9245
ALYREF	11723682_at	6.95108	5.05769	5.47156	5.1658	5.31523	6.73112	5.12628	6.48601	6.30506	6.30384	6.96467	6.79336	6.99146	5.87573	5.82878	5.58341	5.58491	5.5561	5.35945	5.90566	6.25682	5.70109	6.49926	5.95844	6.54921	5.8124	5.76486	5.69785	5.98836	6.16829	6.24242	6.35913	5.92652	5.77101	6.37625	6.19542	6.97172	6.23735	6.43605	6.0891
AMACR	11762980_a_at	2.71401	3.1487	2.77895	2.97511	2.89491	2.66839	3.44606	2.79819	2.52401	2.8071	2.29854	2.75533	2.49227	2.67082	2.91037	2.83944	2.91789	2.58275	3.00097	2.44489	2.17966	3.06911	2.79894	2.78811	2.62134	2.80379	3.16748	2.84035	2.68516	2.6813	2.53958	2.56381	3.15905	2.42369	2.62167	2.97985	2.68118	3.04089	2.92139	3.0534
AMBN	11737849_at	3.41811	4.41879	4.38598	4.60954	4.25989	3.8641	4.65874	4.08682	3.96498	3.49154	3.71554	3.98545	3.52499	4.11897	3.68503	3.99499	4.50417	4.07293	4.12493	3.86762	3.49712	3.92689	4.02601	3.82659	4.06253	4.42696	4.11361	3.8963	4.0273	4.19661	4.2796	3.71096	4.08335	3.89408	3.62296	4.17433	4.13839	3.65731	3.75206	4.34403
AMBP	11747103_a_at	2.75311	4.09054	3.66394	3.8766	4.25989	3.59556	4.19519	3.50239	4.18075	3.61189	3.45835	3.48245	3.08875	3.83287	3.59891	3.46264	4.18386	3.64131	3.65715	3.41194	2.93888	3.48245	3.47628	3.44138	2.94957	3.68358	3.76713	3.42481	3.58644	3.32053	3.58563	3.56964	3.37449	3.60117	2.99432	3.50239	2.72717	3.66229	3.14049	3.83743
AMBRA1	11748994_a_at	4.18639	3.6104	3.76598	4.48733	3.99807	3.44797	3.72209	3.73895	2.78851	3.05745	3.36249	3.27649	3.19308	2.89329	3.43378	3.35754	3.79474	3.56514	3.47044	3.30866	2.8461	3.0314	3.49962	2.96411	3.47874	3.7216	3.39976	3.11818	3.75781	3.2242	3.60758	3.22971	3.36606	3.60249	3.11354	3.48246	3.65263	3.5096	3.40189	3.61025
AMD1	11758768_x_at	7.54936	6.43704	6.90053	6.70241	6.26894	6.84006	6.14888	7.59017	6.69147	7.41139	7.62155	7.21537	7.59871	7.46692	7.45721	7.47128	6.76765	7.46377	7.25245	7.32584	8.34405	7.4658	7.64977	7.40725	7.40192	7.58652	7.25019	7.66359	7.76008	7.47341	6.91332	7.37847	7.92558	7.36409	7.48442	7.53864	7.54598	7.414	7.70346	6.96475
AMDHD1	11724671_a_at	3.07638	4.19801	3.23764	3.7627	4.97595	3.67442	4.04542	4.22789	3.83203	4.3277	3.82879	4.1466	4.38499	4.28387	4.30833	4.14705	4.29767	4.18129	4.21016	4.26658	4.71564	4.52994	3.95951	4.33595	4.50417	3.97224	4.34253	3.39662	3.35831	3.9735	4.0571	3.70012	4.17738	4.27563	4.56957	4.33203	4.22447	3.83939	4.12982	4.12562
AMDHD2	11744583_s_at	5.18455	4.32482	4.22381	3.96087	4.13478	4.56312	4.4242	4.79325	4.68285	4.80012	4.80198	5.32733	4.78056	4.29112	4.54182	4.76446	4.02787	4.68925	4.41659	4.48681	4.77864	4.54831	4.6934	4.33706	4.61396	4.45939	4.49911	4.63694	4.60178	4.63681	4.94985	4.67429	4.55412	4.54793	4.70423	4.57048	4.76582	4.29938	4.65945	4.63839
AMELX	11738781_a_at	4.33118	6.43323	6.27476	6.38945	6.3695	5.9312	6.38157	5.96895	5.82417	5.36432	5.62509	5.29718	5.12587	5.9318	5.81003	5.82196	6.54577	5.80475	6.20787	5.58962	5.05384	5.79056	5.55452	5.55299	5.75352	5.8695	5.79187	5.54032	5.63593	5.65817	6.11004	5.78463	5.45862	5.89307	4.93285	5.91157	4.59708	5.685	5.17106	6.44659
AMELY	11763047_x_at	4.61557	6.09617	5.81723	6.0682	5.90988	5.05858	6.23726	5.43297	5.5836	5.00246	5.19428	4.87969	4.91547	5.43714	5.34561	5.38205	6.04316	5.33547	5.952	5.03353	4.6967	5.35279	5.10147	5.14105	5.25841	5.39676	5.33954	5.29171	5.18897	5.35535	5.4025	5.49731	5.27957	5.52531	4.84528	5.39126	5.1342	5.26312	5.11681	5.89362
AMER1	11755798_a_at	4.41305	5.22365	4.51124	5.17199	5.07476	5.44728	5.33575	4.68664	4.89467	4.49818	4.83534	5.38032	4.62936	5.00284	4.78537	4.88937	5.40463	4.7708	5.14542	4.86319	5.19633	4.67551	4.62013	4.77026	5.0165	4.77978	4.96396	4.8323	4.82343	4.95697	5.00906	4.72473	4.40079	5.11289	4.60259	4.64549	4.99266	4.73004	4.83951	5.09444
AMER2	11741298_a_at	1.97268	2.83932	3.0533	2.53042	2.3501	2.28864	2.86448	2.71519	2.65586	2.30052	2.03414	1.98764	2.2668	2.57286	2.2512	2.14351	2.26314	2.31483	2.40291	2.35288	2.07238	2.39993	2.35864	2.35619	2.18079	2.3691	2.27057	2.28255	2.48073	2.63974	2.35288	2.42531	2.34259	2.78723	2.19755	2.5691	2.15956	2.22349	2.31662	2.3798
AMER3	11733314_a_at	3.25549	4.44677	4.48122	4.44219	4.30141	3.52897	4.36294	4.03938	3.70669	3.79493	3.28671	2.93796	3.47192	3.68906	3.85854	3.78977	4.5359	3.91513	4.24384	3.7903	3.13733	3.65791	3.9929	3.6081	3.81092	3.83361	3.72047	3.55866	3.58786	4.13754	4.12319	3.69247	3.82892	4.02502	3.414	3.9176	3.5564	3.79252	3.39368	4.00727
AMFR	11756087_a_at	7.70299	8.03027	9.61835	8.7351	8.69212	7.93563	9.14047	6.63265	9.12651	7.83923	8.19849	6.95721	7.83966	7.94532	7.47146	7.48529	8.14101	7.80459	7.29411	7.1736	7.82153	8.12894	7.45365	7.31514	7.20232	7.36924	7.72744	7.32337	6.60594	7.40027	7.36961	7.42699	7.41534	6.63146	6.63539	7.26644	7.51768	7.49061	7.10515	7.46023
AMH	11729548_x_at	4.05184	4.77778	4.33004	5.0974	4.49665	4.0932	4.67368	4.20547	4.77322	4.10226	4.03963	3.88815	4.04611	4.11108	4.08647	4.12562	4.70726	3.93923	4.32373	4.13493	4.40729	4.0103	3.86004	4.0394	3.84457	4.40789	3.97017	4.14111	3.99504	4.19652	4.23484	4.11218	4.03467	4.26979	3.97536	4.03209	3.75778	4.14176	3.8198	4.07688
AMHR2	11751278_x_at	3.99807	4.79237	4.48969	4.49179	4.32538	4.25565	4.96383	4.29896	4.47597	4.14555	4.12769	4.35064	4.02597	4.28505	4.42562	4.26081	4.6159	4.24676	4.44806	4.08713	4.24388	4.28873	4.07345	4.04942	4.17841	4.60047	4.21481	3.96943	4.42563	4.30363	4.26499	4.4169	4.28297	4.14672	4.16124	4.39769	4.14243	4.27916	4.14049	4.28873
AMIGO1	11731914_at	3.80309	4.66301	4.09659	4.45652	4.43578	3.80838	4.77454	3.73276	3.95439	4.16861	3.79478	4.09641	4.27901	4.08785	4.36521	4.391	4.68745	4.37646	4.25989	4.48651	3.63645	4.21462	4.26469	4.18658	4.40427	4.27567	4.15144	4.2381	4.28747	4.25543	4.61686	4.39629	3.90785	4.66091	4.30949	4.12501	3.92707	3.90992	4.4396	4.28243
AMIGO2	11736248_at	2.37685	2.53313	2.21787	2.39877	2.41006	2.05081	2.35835	2.2769	2.32656	2.27602	2.65943	2.10639	2.30249	2.38075	2.32656	2.57779	2.60781	2.18015	2.42521	2.46668	2.19427	2.38024	2.26545	2.41759	2.2524	2.47934	2.31467	2.49447	2.40909	2.45827	2.33313	2.26103	2.36633	2.47305	2.35384	2.32907	2.36269	2.14637	2.14183	2.62468
AMMECR1	11758228_s_at	5.48862	4.24873	4.9247	4.29473	4.24446	6.97339	5.00616	4.83339	4.74746	4.77323	4.90704	5.30529	5.67914	4.68504	4.62725	5.09938	4.63951	4.76318	4.39179	5.11347	5.69872	5.26607	4.54358	4.84319	5.08077	4.60269	4.55538	5.30633	4.98802	4.85834	5.09553	5.29522	4.56246	4.89313	4.90488	4.56891	5.04161	4.83274	5.22755	4.52421
AMMECR1L	11745805_a_at	3.04508	2.93072	3.42828	3.45159	3.11721	2.93528	3.57794	3.28678	3.12624	3.05932	3.36659	2.83334	2.86919	3.20753	2.84766	3.10632	3.07808	3.42706	2.94277	2.9689	2.69956	3.46283	3.014	3.03312	2.83461	2.98013	3.11756	2.96968	3.05263	3.3869	3.037	2.94758	3.0345	3.2291	2.46944	2.98378	2.72482	2.94872	2.9095	3.24092
AMN	11733804_at	5.43458	6.31815	6.06382	6.27341	6.40899	5.53367	6.20623	5.54441	6.31438	5.3462	5.3623	4.99238	4.83417	5.30604	5.4702	5.44611	6.14932	5.58739	5.66387	5.22314	4.8676	5.29671	5.27874	5.41624	5.33166	5.51813	5.34547	5.22277	5.30123	5.40373	5.5544	5.36881	5.39396	5.75682	5.26645	5.37774	4.83488	5.32596	5.14752	5.78578
AMN1	11723263_a_at	5.77041	5.04898	5.99571	5.747	4.39108	4.69278	4.24448	6.14082	5.24943	6.04732	5.46353	5.42213	6.30246	5.57647	5.52576	5.97921	4.62461	5.75186	5.38759	5.84405	6.96514	5.57487	5.98993	6.16938	5.66727	5.75172	5.89443	6.29246	6.04865	5.67245	5.22598	6.21653	7.55306	5.81436	7.08407	6.35395	7.0409	5.65597	6.38492	5.83917
AMOT	11739350_a_at	1.797	1.94111	2.14982	2.00287	2.55027	2.09403	2.00146	2.01224	2.19505	1.83257	1.88244	1.73004	1.92853	2.02376	1.81106	1.95358	1.91684	1.8854	1.96572	1.72363	1.71693	1.91337	1.96832	1.85697	2.02424	1.91718	1.87956	1.64551	1.77433	1.56973	1.84162	2.10602	1.91337	1.87244	1.82628	1.87039	1.58962	1.72556	1.75307	1.89032
AMOTL1	11725704_a_at	4.07658	3.3894	3.65442	3.43922	3.10661	4.07095	3.42339	2.60632	3.32035	2.9177	2.83498	2.8486	2.7246	3.04794	3.05304	2.87791	3.37862	3.03158	3.43044	3.11522	2.85505	3.08696	3.16095	3.0273	3.14994	3.30906	3.29547	2.99944	3.00641	3.17205	2.97724	3.1635	3.15452	3.07813	2.90429	3.32937	3.11262	3.25292	2.97201	2.90288
AMOTL2	11733006_at	2.35646	2.88869	3.01967	3.11478	3.6248	2.96013	3.53566	2.71519	3.49283	2.89967	3.08505	2.99155	3.00747	3.06888	2.77967	3.08998	3.01523	2.83339	2.9048	2.81077	3.14461	2.89805	2.92059	2.86159	2.6321	2.86136	3.04778	2.78753	2.59916	2.809	2.98602	2.72826	2.7961	2.89967	2.45933	2.76273	2.18779	2.68075	2.51378	3.08347
AMPD1	11730365_at	2.95418	3.69536	3.39465	3.40517	3.21754	3.19986	3.15707	2.97029	3.40457	3.26831	2.7044	2.99155	2.89866	3.15035	3.13478	3.11525	3.48865	3.11794	3.55672	3.05614	3.27196	3.37456	3.27276	3.1143	3.12439	3.3417	3.15427	3.04178	3.26369	3.19477	3.2252	2.85934	3.19948	3.50963	2.82365	3.17439	2.70897	3.12413	3.05064	3.10149
AMPD2	11730829_a_at	5.97018	5.90513	5.86897	5.86939	5.98985	5.63909	5.60482	5.55103	5.65442	5.80718	6.05449	6.0927	5.56021	5.9318	6.53179	6.41901	6.15903	6.07431	6.37	6.22439	5.78134	6.20692	6.18215	6.5286	5.87357	6.13211	6.48099	6.3179	6.47292	6.55608	5.72719	5.59625	5.76815	5.8488	5.74628	5.79701	6.08311	6.15093	6.11697	5.86352
AMPD3	11739420_a_at	3.8409	3.88628	3.94622	3.85277	3.83578	3.1631	4.25338	3.70729	3.38944	3.00148	3.4221	3.5276	3.50218	3.79099	3.79421	3.62293	3.40979	3.5394	3.92852	3.65325	3.26666	3.31121	3.28016	3.41712	3.57594	3.75822	3.60656	3.43429	3.40013	3.49995	3.28292	3.31514	3.68367	3.48996	3.46956	3.54285	3.14464	3.01228	3.26839	3.62284
AMPH	11755701_a_at	3.33543	4.19371	4.35743	4.58593	4.16768	3.71144	4.65139	3.72359	3.83909	3.58093	3.45165	3.47384	2.9439	3.91536	3.75914	3.80072	4.32221	3.76765	3.80101	3.83909	3.55412	3.58199	3.59947	3.75847	3.71272	4.02549	3.77457	3.72533	3.7141	3.81242	3.93942	3.82089	3.80963	3.91925	3.56768	3.75732	3.79684	3.58836	3.42145	4.14304
AMT	11753468_x_at	3.19108	4.1785	3.78548	3.71279	3.40028	3.70115	3.75208	4.07056	3.64388	3.83553	3.45021	3.90797	3.71718	3.74344	3.68952	4.14168	4.0754	3.6804	4.00687	3.66714	3.72878	3.77703	3.59691	3.58256	3.916	3.83357	3.75317	3.85133	3.71336	3.65296	3.65325	4.21305	3.83873	3.64484	3.53892	3.7144	3.71688	3.755	3.93029	3.81753
AMTN	11737557_at	3.75896	4.53986	4.12554	4.13436	4.90833	4.20149	4.52804	3.55668	4.45298	4.33541	3.88191	3.77202	3.90111	4.39794	4.18504	4.19409	4.58606	3.99807	4.43586	4.32917	3.80171	3.96342	3.8408	4.16461	3.7279	4.22129	4.35811	4.07714	4.06168	4.04278	3.96238	4.05907	3.97504	4.18109	4.13059	4.15064	3.97155	3.71947	4.14028	4.42769
AMY2B	11744433_x_at	5.67842	4.74344	4.31899	3.64393	3.82756	5.48425	3.70815	5.06042	4.78237	5.14948	5.22185	5.9405	6.34737	5.03932	5.34495	5.42899	4.00609	5.366	4.85231	5.95477	6.29608	5.42389	4.94883	5.77765	5.3127	5.03188	5.80421	5.80748	5.13319	5.57828	4.19261	5.46844	5.97494	5.40672	5.99057	5.35999	6.21441	5.3021	6.50964	4.83796
AMZ1	11735555_a_at	3.50775	4.37307	3.94292	4.10426	4.34818	3.9912	4.36693	4.04248	3.88194	3.67556	3.39027	3.27697	3.2758	3.80771	3.68582	3.7857	4.56576	3.62253	3.88589	3.56541	3.3289	3.36294	3.49368	3.6344	3.59355	3.67726	3.94457	3.44511	3.64906	3.61465	3.87641	3.7531	3.59131	3.98806	3.41353	3.59801	3.08683	3.46038	3.24647	4.04312
AMZ2	11721423_a_at	8.34283	8.16548	9.31286	8.20201	8.46071	8.23978	8.44503	8.47906	9.02563	8.52026	8.57959	8.7942	8.98431	8.80461	8.2937	8.49499	8.05554	8.41504	8.37157	8.62079	8.75729	8.48857	8.22232	8.49424	8.81023	8.3924	8.68648	8.79163	8.58398	8.41674	8.18008	8.7688	8.29102	8.32643	8.62304	8.21729	8.51282	8.67077	8.57642	8.10855
ANAPC1	11721892_a_at	6.29284	5.60492	4.54131	5.17521	5.57502	6.81859	5.78166	5.75544	5.61683	5.6681	6.68789	6.26739	6.5221	5.67164	5.9165	6.00123	5.72945	5.88277	5.53456	5.99851	5.97922	6.09353	5.43631	5.88197	6.00274	5.87695	5.49502	6.12675	5.86655	5.83535	6.21676	6.088	4.94031	6.00684	5.77746	5.61609	5.68149	5.67929	6.44981	5.48589
ANAPC10	11735774_a_at	5.4238	2.90754	3.35513	2.57561	2.97892	4.27854	3.25965	2.81155	3.55074	4.86541	3.75432	3.77439	4.43955	3.60342	3.19831	3.1513	3.51133	3.31417	2.95752	4.16332	4.03994	3.18331	4.41305	3.81835	3.63771	3.75779	2.80285	3.63464	3.31492	3.62067	3.42224	4.39809	3.49169	3.57336	3.99807	3.77436	4.06929	3.58196	3.91456	3.21389
ANAPC11	11728990_a_at	5.26523	6.30192	6.36765	6.46182	6.34633	5.85155	6.20924	5.83457	6.0563	5.50746	5.82801	5.49066	5.2762	5.78607	5.88762	6.05276	6.42707	6.00113	6.43329	5.74467	5.14089	5.79168	5.87946	5.72119	5.79374	5.97822	5.98495	5.87769	5.93579	5.88036	5.87589	5.86551	5.7661	6.02115	5.56985	5.95347	5.03963	5.73152	5.39448	6.31496
ANAPC13	11754697_a_at	7.4008	6.44799	6.77726	6.43231	6.7819	7.1318	6.39398	7.37947	6.50173	7.46907	7.37096	7.37137	7.30872	7.26175	7.46154	6.99061	6.85513	7.31771	7.28537	7.63296	7.73853	7.45278	8.19427	7.48838	7.27261	7.51003	7.35462	7.67374	7.30926	7.50826	7.242	7.47444	7.67812	7.51668	7.67649	7.57581	7.60581	7.37423	7.5532	6.83901
ANAPC15	11726077_a_at	6.18657	5.77335	6.01393	5.51905	5.8846	5.77152	5.71807	5.49106	5.67827	5.64745	5.83593	5.77927	5.70834	5.80168	5.78284	5.65717	5.91636	5.81843	5.7462	5.97485	5.63072	5.7511	6.10103	5.77035	5.88127	5.66616	5.86151	5.63178	5.76501	5.61832	6.24165	5.80768	5.586	6.14701	5.76902	5.80667	5.8297	6.01836	5.66407	5.7892
ANAPC16	11729130_at	8.29023	7.93594	7.73722	6.87491	7.95634	8.45382	7.34044	7.84807	8.12507	8.22282	7.9746	8.76654	8.61881	8.22348	8.40802	8.53301	7.92267	8.23318	7.73797	8.45582	8.34588	8.36792	8.102	8.20194	8.20751	8.34472	7.74545	8.38139	8.06484	8.18423	8.02189	8.22973	7.86931	8.43966	8.42474	7.60086	8.47464	8.00799	9.01491	7.57707
ANAPC2	11752431_a_at	3.61773	3.32477	3.60774	3.64275	3.87584	3.67812	3.85581	3.78346	4.20904	3.38186	4.03522	3.48469	3.72152	3.69699	3.58959	3.87776	3.6988	3.7183	3.84255	3.58412	3.93372	3.62789	3.89787	3.76023	3.62943	3.85127	3.68461	3.57788	3.63843	3.65577	3.7377	3.85609	3.58463	3.51017	3.5304	3.51821	3.97338	3.86192	3.51295	3.88589
ANAPC4	11720137_a_at	7.55518	6.76621	6.73675	6.24235	6.52145	7.24216	5.42167	7.29334	7.64821	7.60578	7.34219	7.79604	8.1916	7.16662	6.92106	6.92535	6.56406	7.12834	6.80251	7.75631	7.70909	7.34499	6.98274	7.40055	7.52724	7.16687	7.23659	7.72633	7.05897	7.2475	6.73646	7.57844	7.1977	7.4837	7.41186	7.53231	7.70424	7.35059	7.84975	6.67235
ANAPC5	11715599_a_at	9.33083	7.79953	7.5972	7.6373	7.79413	8.74183	7.35428	8.49865	8.05928	8.65669	8.77664	9.18736	8.99187	8.37519	8.49499	8.62744	7.75906	8.49602	8.13282	8.85501	8.82756	8.72884	8.49702	8.54814	8.86889	8.37652	8.49587	8.87776	8.59738	8.71239	8.72979	8.75295	8.24501	8.49413	8.67435	8.458	9.10694	8.71631	9.10083	8.18466
ANAPC7	11726620_at	4.31882	3.96681	3.82595	4.1929	4.42023	3.80294	4.53693	4.20525	3.71797	4.19557	4.0825	3.78269	4.24559	4.15952	4.2299	4.44179	4.06951	4.284	4.23826	4.09335	4.23492	4.26029	4.35122	4.23095	4.2293	4.05596	4.28391	4.4568	4.21306	4.17901	4.19261	4.18699	4.23686	4.06167	3.93785	4.43179	4.25361	4.41971	4.41713	3.97833
ANG	11721569_a_at	2.90515	3.82222	3.32459	3.32736	3.00055	3.14935	3.15922	3.51192	3.46111	3.39441	3.57794	3.14001	3.53027	3.68112	3.40242	3.44844	3.43411	3.1285	3.44169	3.38117	3.31075	3.61122	3.28438	3.56353	3.07519	3.33864	4.16213	2.88734	3.31696	3.48424	3.25586	3.73724	4.24232	3.40545	4.08966	3.7436	3.79199	4.45816	3.31383	3.78407
ANGEL1	11720546_at	3.1902	4.46012	4.0551	4.20251	4.23083	3.65715	4.01321	3.98308	4.14472	3.5054	3.67144	3.45356	3.51223	3.79746	3.68071	3.48643	4.28991	3.8039	3.99708	3.97133	3.315	3.6536	3.41585	3.6597	3.64466	4.04566	3.92748	3.64197	3.63423	3.69639	4.12943	3.73432	3.41063	3.28485	3.48891	3.7063	3.45335	3.50085	3.49323	3.92314
ANGEL2	11759714_at	3.08463	3.6793	3.87143	3.63425	3.96808	3.36672	3.6528	3.34921	3.48267	3.57433	3.57929	3.34614	3.32563	3.53782	3.52087	3.28413	3.92402	3.64044	3.52026	3.44769	3.13054	3.29413	3.64677	3.45006	3.41933	3.31733	3.49035	3.25358	3.40061	3.52217	3.54047	3.59813	3.30047	3.46596	3.03449	3.76061	3.25838	3.31358	3.34073	3.74781
ANGPT1	11762193_at	1.81156	1.64827	1.95721	1.8293	1.79356	1.9632	1.74038	1.94786	1.5819	1.83338	1.97385	2.13106	2.05881	1.61366	1.98707	1.66436	1.66244	1.80305	1.80712	1.61146	2.06369	2.00646	1.62691	1.93156	1.63658	1.7716	1.74699	1.81418	1.72423	1.788	1.7696	1.57552	1.83115	1.89088	1.96387	1.93581	1.77558	2.00688	1.93156	1.78338
ANGPT2	11742028_a_at	4.8601	2.78474	2.40795	2.55117	2.80777	2.0903	2.58445	2.40554	2.55147	2.71032	2.65943	2.55412	2.50889	2.61541	2.65488	2.5343	2.5114	2.93805	2.39759	2.56687	2.70932	2.69298	2.17832	2.32442	2.43394	2.30266	2.49856	2.4892	2.49367	2.57794	2.79845	2.3936	2.70746	2.59502	2.48095	2.46227	2.54179	2.53724	2.55723	2.56183
ANGPT4	11752659_a_at	2.76686	3.61586	3.30649	3.45184	3.4549	3.2921	3.61857	3.27606	3.2419	3.35644	3.28563	3.73292	3.18559	3.25945	3.75497	3.26628	3.46671	3.37046	3.26261	3.04149	3.37838	3.15366	3.3229	3.32334	3.27419	3.09203	3.26424	3.38688	3.22465	3.41104	3.48126	3.30344	3.4678	3.01937	3.10954	3.44025	3.42608	3.26013	3.28363	3.24092
ANGPTL1	11730883_at	1.57804	1.93285	1.74496	1.98754	2.13825	2.10573	1.69138	2.05716	1.94192	1.92599	1.80072	1.89179	1.65687	1.76894	1.6625	1.58991	2.08009	1.79534	1.76522	1.91713	1.62736	1.83524	1.7046	1.6629	1.86835	1.6122	2.11551	1.58731	1.86672	1.72527	1.561	1.69045	1.72728	1.89798	1.7657	1.75228	1.73652	1.61314	1.67489	1.80855
ANGPTL2	11718268_a_at	2.32437	3.36351	3.33242	3.04345	3.06011	2.70756	3.6385	2.77603	2.96889	2.31696	2.42001	2.43325	2.54621	2.70955	2.53943	2.61065	3.1253	2.69212	2.88524	2.55274	2.3661	2.77337	2.50865	2.44303	2.43088	2.74684	2.74803	2.29102	2.79878	2.60157	2.8316	2.35532	2.39917	2.61298	2.40099	2.797	2.37453	2.42569	2.14073	3.11141
ANGPTL3	11732272_at	1.8901	2.33087	1.95915	2.02157	2.09861	1.96736	2.08719	1.98751	2.46129	1.96586	1.86441	1.78666	1.73104	1.94399	2.10202	1.97961	2.0428	2.14553	2.09325	1.95346	1.90512	1.95541	2.03004	1.91366	1.96948	2.15563	1.91045	1.83707	2.00454	1.84029	2.07142	1.84914	2.00886	2.16746	1.88158	2.20005	1.99027	1.94374	1.71704	2.03998
ANGPTL4	11716630_a_at	4.38705	5.12017	4.97397	4.88821	5.11323	4.62741	5.18174	4.84045	4.83962	4.28826	5.05722	4.6128	4.38274	4.56873	4.39119	4.36877	5.07594	4.68396	5.04399	4.49777	4.55969	4.61356	4.32256	4.62589	4.35092	4.55348	4.65107	4.42963	4.49254	4.5589	4.7943	4.71978	4.39897	4.59345	4.57064	4.78093	4.27759	4.64637	4.16292	4.95004
ANGPTL5	11732025_at	1.65852	1.84646	1.94075	1.66219	1.84431	1.79433	1.70964	1.8377	1.87265	1.80392	1.71332	2.16911	1.64278	1.87934	1.77473	1.71751	1.85472	1.88596	2.03418	1.81631	1.82626	1.66681	1.87132	1.78118	1.67383	1.79576	1.62292	1.84833	1.85915	1.8375	1.77427	1.90703	1.6071	1.83792	1.62873	1.65726	1.82046	1.76257	1.61118	1.64248
ANGPTL6	11735149_at	3.87496	4.75196	4.89959	4.78632	5.18519	4.11891	4.8311	4.15475	4.64772	4.11723	3.78208	4.02281	4.5324	4.59566	4.30192	4.07723	4.60992	4.63442	4.79276	4.21267	4.20937	4.34687	4.22077	4.26964	4.38046	4.53782	4.35711	4.7658	4.34218	4.25191	4.33188	4.28958	4.16218	4.46242	4.02928	4.44772	4.21922	4.26863	3.81234	4.24016
ANGPTL7	11743860_at	2.08881	2.88786	2.66775	2.65373	2.90533	2.49934	2.99891	2.01981	2.55192	2.19771	1.99289	2.09952	2.62012	2.29867	2.30229	2.16	2.43007	2.23049	2.28941	2.12877	1.60323	2.31124	1.96151	2.1512	2.22692	2.27727	2.59125	2.00249	2.27097	2.03037	2.14749	1.88822	2.01563	2.45856	2.27237	2.25058	1.93585	2.08546	2.03791	2.59144
ANGPTL8	11756040_a_at	2.80976	3.93419	3.5791	3.56387	3.80878	3.1513	4.0512	3.23218	3.73978	3.12942	3.2331	3.228	2.98565	3.30268	3.582	3.03773	3.71551	3.25969	3.44328	3.08206	2.82515	3.50112	3.09118	3.1585	3.16981	3.27108	3.30268	3.03313	3.2116	3.2331	3.23709	2.98228	3.30656	3.07853	2.92053	2.98893	2.69203	3.23703	2.92361	3.1054
ANK1	11740098_a_at	4.19225	7.32047	6.48105	6.9869	7.20599	6.34697	8.16682	5.55988	7.05432	4.75098	5.15442	4.61433	4.23229	6.00214	4.81834	5.14313	6.67058	5.49022	5.53478	4.29312	4.78179	5.11889	4.13185	4.44681	3.9494	5.01163	4.56844	4.11709	4.21787	4.67211	4.73628	4.54662	4.53989	4.76774	4.24436	4.7672	3.92731	4.66301	4.13218	4.8602
ANK2	11755331_a_at	1.84183	2.38621	2.64935	3.22165	2.41006	2.88771	2.48531	2.2725	1.83535	2.31799	2.23633	2.1262	2.12968	2.37417	2.41319	1.97383	2.58198	2.23725	2.44096	2.33705	2.30303	2.34951	2.14775	2.40345	2.25951	2.31506	2.21106	2.30227	2.25992	2.29101	2.44042	2.05324	2.34134	2.24943	2.13945	2.36212	2.06532	2.39968	2.20555	2.35394
ANK3	11721204_a_at	2.71686	3.35269	3.19748	3.50301	3.17181	3.89556	4.01061	4.17001	4.36679	4.13465	4.3949	4.63398	4.51143	4.12519	3.47677	4.67289	4.14682	4.53471	3.52117	4.93086	3.24107	3.79524	4.25239	3.77624	3.78413	4.11533	3.52991	4.92327	4.33236	3.85695	3.71036	4.46711	3.33098	4.5206	4.08191	3.48851	4.29634	3.61649	4.85161	3.58543
ANKAR	11735497_a_at	2.04065	2.46635	2.52637	2.50637	2.55117	2.42151	2.82348	2.14263	2.28814	2.18174	2.03942	2.20146	2.07455	2.25251	2.35855	2.48159	2.62808	2.44672	2.60042	2.29577	2.26828	2.33959	2.35595	2.31617	2.25343	2.42367	2.16943	2.16637	2.17491	2.3962	2.34594	2.12385	2.19333	2.37834	2.06268	2.2553	2.26655	2.25298	2.20096	2.29449
ANKDD1A	11726243_a_at	4.16709	3.47764	3.69976	3.18271	4.01147	3.24964	3.57794	3.90763	3.89947	3.6104	3.59813	3.72968	4.85491	3.63514	3.81606	3.5923	3.70955	3.72447	3.67919	4.28077	3.45104	3.51069	4.01896	3.94846	4.12585	3.39977	3.92499	3.62268	3.74519	3.63315	3.74954	3.87499	3.67808	3.71464	3.52596	3.95104	3.74859	4.19801	3.78651	3.30365
ANKEF1	11729963_a_at	2.35409	2.81559	2.76214	2.3284	2.53448	2.63034	2.60905	2.40444	2.66893	2.71922	2.51945	2.8729	2.57342	2.37391	2.22678	2.7781	2.63911	2.55541	2.60245	2.91716	2.58581	2.76418	2.58344	2.57591	2.53724	2.66675	2.51032	2.4693	2.81435	2.47958	2.44838	2.23046	2.50701	2.78723	2.69786	2.58344	2.63027	2.34592	2.70747	2.73581
ANKFN1	11737122_at	2.06431	2.94623	2.59313	2.49415	2.68534	2.20844	2.46543	2.92075	2.28814	2.22133	2.4172	2.42587	2.13443	2.40986	2.44209	2.49511	2.52344	2.51795	2.56363	2.35402	2.51323	2.20892	2.53081	2.21779	2.39297	2.4133	2.5333	2.27777	2.37175	2.27224	2.63783	2.34341	2.1159	2.48022	2.17457	2.61813	2.16869	2.22349	2.24324	2.42859
ANKFY1	11748572_a_at	2.67904	3.13419	2.64711	3.24634	3.86059	2.95569	3.42613	3.56669	2.83574	3.1864	3.74573	3.14554	3.00704	3.05729	3.27279	3.41445	2.95927	3.12872	3.28204	2.70304	3.05994	3.15173	3.14702	2.95355	3.29806	3.19108	2.88942	3.72186	3.11902	3.31271	3.00937	2.85679	2.97637	3.1117	3.18498	3.5304	3.49991	3.14746	3.15054	2.67742
ANKH	11719003_x_at	2.05995	3.87127	2.82516	2.83126	4.02714	2.44529	3.68657	2.42703	3.01178	2.83564	2.48931	2.80551	3.06451	2.48608	2.11345	2.99362	2.81211	2.50913	2.14628	2.64077	2.24308	2.90853	2.00454	2.78723	1.87583	2.24592	2.11954	2.45175	2.20461	2.3633	2.25298	2.13421	1.82628	2.60432	2.00208	1.74536	2.16592	2.51517	3.01931	2.15843
ANKHD1	11757688_a_at	3.62099	3.23624	3.91758	3.53043	3.22695	3.66049	3.68932	3.43251	3.64023	3.75485	4.29689	3.62411	3.74445	3.45356	4.00748	3.84219	3.18518	3.65695	3.29098	3.60654	3.81396	3.70134	3.72997	4.24354	4.03664	3.34333	4.3392	3.57597	4.0606	3.48915	3.53785	3.48616	3.42442	3.26384	3.66518	3.11746	3.96449	4.059	3.49384	3.41161
ANKIB1	11744084_s_at	7.19096	5.9965	6.04619	6.25744	6.04071	6.86505	5.44295	6.72761	6.71502	7.34994	7.07809	7.04892	7.44842	6.84783	6.26345	6.63168	6.06862	6.82843	6.16767	7.22546	7.33687	6.9249	6.8541	7.08847	7.35984	6.70502	6.59126	7.42552	6.81792	6.83405	6.50169	7.23911	6.96257	6.85961	7.12122	6.95007	7.53403	7.3466	7.43709	6.02035
ANKK1	11742088_at	4.22288	5.61363	5.19401	5.5713	5.36667	4.48168	5.38222	4.49186	5.40759	4.68474	4.58922	4.78775	4.49625	4.83457	4.93404	4.89155	5.67302	4.68714	5.25143	4.6253	4.59488	4.63558	4.46085	4.73827	4.49217	5.23869	5.06962	4.29942	4.90917	4.88288	4.71251	4.69438	4.8658	4.87414	4.42878	4.70864	3.8875	4.68489	4.38763	5.26127
ANKLE1	11740178_x_at	3.30394	3.4253	3.68731	3.34719	2.8533	5.17987	5.94698	2.8688	3.12545	2.89398	2.97108	2.77675	2.97287	2.86112	3.21716	2.68329	2.9669	2.56539	2.93639	2.87366	3.06366	2.87795	2.76439	2.73879	2.72695	2.53212	2.9876	2.76016	2.99991	2.74302	2.72172	3.47846	2.98902	2.91291	2.51877	3.44083	3.67144	3.1271	2.98118	3.20124
ANKLE2	11749281_a_at	6.92807	5.09112	5.06054	5.25283	5.16978	5.95475	4.93076	5.77632	5.1697	5.79113	5.89924	6.34986	6.21373	5.5961	5.98858	6.01399	5.5505	5.6572	5.72109	5.96394	6.21507	5.74086	5.73989	5.85911	5.66573	5.69078	6.32228	5.80151	5.81092	5.70974	5.48531	5.66895	5.76533	5.6351	6.10064	5.54135	6.06832	5.79997	6.33039	5.45413
ANKMY1	11761000_at	2.7155	3.21376	3.27396	3.51706	3.32438	2.86666	3.66315	2.99634	3.03913	2.59178	3.04213	3.2699	2.60351	3.06358	2.92934	2.91884	3.47456	3.18041	3.27778	3.09352	2.86555	2.98323	3.02571	2.62622	2.83048	2.81984	2.9696	2.83339	3.04007	3.03723	3.40427	3.04879	3.05906	3.17442	2.84904	2.99891	2.72675	3.17488	2.80892	3.30169
ANKMY2	11733834_a_at	6.2968	5.18407	4.96242	4.79221	5.36122	6.33759	4.86861	5.85808	5.87639	6.26826	5.72296	6.31251	6.49461	5.70725	5.56725	5.56229	4.54108	5.82498	5.40642	6.09093	6.18822	5.90726	5.73798	5.94781	6.07091	5.85715	5.61053	6.17682	5.64802	5.84147	5.60875	5.98276	5.82398	5.7526	5.99855	5.91657	6.38287	6.15045	6.4366	5.32887
ANKRA2	11719417_at	6.55606	5.53198	5.18855	4.51645	4.72756	5.64268	4.37623	5.94327	5.48316	6.2312	6.03579	6.1487	6.97628	5.84166	5.43631	5.87057	4.89373	5.99034	5.20069	6.29816	6.80204	5.99332	5.90451	6.04638	6.16273	5.8413	5.40354	6.58166	6.09485	5.97441	5.02253	6.3056	6.58118	6.09808	6.31914	6.30958	6.37815	6.36449	6.63201	5.46135
ANKRD1	11731445_at	2.29509	2.80278	2.28307	2.18178	2.38101	2.0141	2.57735	2.30548	2.4194	1.85511	2.12466	2.29509	2.02276	2.10581	2.1073	2.14138	2.14628	2.33382	2.27421	2.05127	1.99689	2.21293	2.2332	2.11923	2.13954	2.0336	2.14717	2.04732	2.0719	2.10348	2.14235	2.1002	2.07949	2.08497	2.09795	2.24788	2.14873	2.10807	2.16076	2.11115
ANKRD10	11761390_a_at	8.14215	5.86006	5.83639	5.73356	6.24305	7.60651	5.41005	7.12697	6.41225	6.89324	7.01629	7.05578	6.9473	6.49789	6.5375	6.66064	5.88905	6.57137	6.09399	6.88099	7.50259	6.89325	6.49782	6.77554	6.58075	6.56789	6.68698	6.82037	6.54846	6.81328	5.98491	6.80927	6.96486	6.7387	7.38413	6.70027	7.19689	6.66181	7.24195	6.41319
ANKRD11	11727066_a_at	6.26134	6.41305	6.03918	6.0852	6.43064	6.95045	6.32614	6.67779	5.89199	6.45648	6.52534	6.72579	5.79908	6.71544	6.85885	6.92085	6.51747	6.70563	6.70554	6.79636	5.74812	6.72221	6.36819	6.93796	6.42225	6.54334	6.95206	6.77933	6.67694	6.40973	6.56632	6.33423	6.32639	6.48395	7.05764	6.40838	6.94589	6.17448	6.97064	6.56032
ANKRD12	11721746_x_at	3.71379	3.50569	4.29368	3.67636	4.04951	3.64967	4.18614	4.00536	4.15005	4.10361	3.77626	4.48437	4.07002	4.0751	4.7751	4.09782	4.15742	4.12514	3.8243	3.84841	3.35832	4.12258	3.54717	4.19712	3.73539	4.02051	5.01257	4.24358	4.33236	3.97646	3.87641	4.06549	4.15823	3.85031	4.4411	4.07526	4.25432	4.1003	4.02782	4.22037
ANKRD13A	11717692_a_at	5.11888	4.7326	5.10335	4.8286	5.00054	4.68757	4.05382	4.99541	5.00086	5.01918	5.35608	4.80651	5.0499	5.01482	5.48994	5.32902	4.499	5.20587	5.1732	4.90485	5.37257	4.99619	5.18502	5.21312	5.34026	5.17618	5.42129	5.58605	5.1629	5.11797	4.27074	5.02555	5.78997	4.80216	5.56528	4.92374	5.51344	5.08748	5.01923	4.59984
ANKRD13B	11723890_a_at	4.5443	5.58261	5.22039	5.6913	5.69118	5.04365	5.83203	4.57995	5.17955	4.64623	4.62466	4.58856	4.26041	5.2283	5.0115	4.78996	5.79444	5.08282	5.51295	4.78972	4.36613	5.27576	4.92484	4.80398	4.83686	4.94175	5.14934	4.87118	5.03244	4.93645	5.0804	4.99985	4.76853	5.20976	4.50848	5.04443	4.54727	4.81037	4.58429	5.376
ANKRD13C	11758477_s_at	3.69055	2.15062	2.27335	2.22812	2.09381	3.04617	2.25328	2.41985	2.70732	3.54423	2.62319	3.22945	4.05647	3.25411	2.15997	2.73399	2.30605	2.94891	2.3217	3.69895	2.95715	3.20397	3.07118	3.18664	3.13733	3.13498	2.15697	3.44429	2.74136	3.06842	2.78201	3.37803	2.82533	2.76392	3.02333	2.95249	3.43375	3.10469	3.4477	2.56368
ANKRD13D	11755320_x_at	6.56406	6.31045	6.5327	6.56114	6.25366	5.98132	6.5219	7.11056	6.46969	6.40335	6.65236	7.27376	6.81814	6.55694	6.8384	6.72506	6.31027	6.47512	6.64889	6.74071	7.07799	6.75417	6.53845	6.7489	6.58075	6.52544	7.14763	6.85625	6.93151	6.73102	6.72385	6.50909	7.28133	6.68452	7.28666	6.61624	7.22444	6.54527	6.92472	6.57639
ANKRD16	11755096_x_at	4.3825	4.1193	3.55215	4.08936	3.82261	4.39129	3.77331	3.6104	3.94488	3.94362	3.66587	4.01745	3.72293	3.88297	4.00611	4.22076	4.08947	3.81455	4.04951	4.03749	3.74507	3.89349	3.78605	3.9399	3.92041	4.02131	3.8756	4.22968	3.79103	3.89886	3.73485	3.85345	3.67273	3.59663	3.85033	4.08275	4.08947	3.99287	4.4215	3.92643
ANKRD17	11740047_s_at	6.42837	4.936	5.12785	5.30277	5.54155	6.28903	5.01375	5.88394	5.56807	5.97602	6.11799	5.90316	6.65878	5.70725	5.92685	5.86112	5.34167	5.72522	5.34711	6.10455	6.59319	5.93646	5.81942	6.2758	6.03341	5.73531	5.88687	6.0737	5.85243	5.98585	5.61399	6.04592	5.7849	5.92995	5.95149	5.88253	6.46899	5.96709	6.41832	5.31025
ANKRD18A	11749095_at	1.84629	1.98426	2.00812	2.25392	2.19077	1.83401	2.05933	2.05177	1.99029	2.48057	1.88004	2.20017	2.13155	2.05517	1.98794	1.92145	2.00876	1.9183	2.13721	2.08906	2.15741	1.94023	1.78858	2.20881	1.8624	1.87713	2.00641	2.13363	1.97172	2.08561	1.74574	2.16761	2.09821	2.07329	2.22388	2.17771	1.90192	1.81852	2.00831	1.92301
ANKRD2	11726349_a_at	3.6005	5.37846	5.17294	5.35636	5.15384	4.80605	5.75252	4.47498	4.52804	4.44455	4.18328	3.97812	3.74915	4.7295	4.34176	4.41818	5.08369	4.42667	4.86914	4.37746	3.77546	4.48265	4.36332	4.34012	4.31702	4.28636	4.54947	4.08691	4.5572	4.48038	4.51752	4.34773	4.43247	4.80785	4.19934	4.46216	3.37947	4.28249	3.99534	5.1336
ANKRD22	11732424_at	4.41305	5.04663	4.67702	5.15083	3.70868	3.73782	4.59555	4.7336	3.82884	4.36095	4.34035	3.89726	3.38259	4.32859	4.18695	3.7349	3.20273	3.77381	3.76946	3.89366	4.0582	3.50698	4.38729	3.43754	5.35941	3.88	3.47998	3.64551	4.5712	3.64298	4.14156	4.0358	3.67688	3.91998	4.13141	4.90922	5.16365	3.7041	3.41792	3.9198
ANKRD24	11733473_at	4.13917	5.10657	5.03655	5.21364	5.43762	4.56814	5.19234	4.6109	5.21723	4.48739	4.05505	4.43008	4.28341	4.60327	4.6208	4.56414	5.19393	4.48253	5.02804	4.31373	4.37062	4.74871	4.63965	4.54724	4.22363	4.49925	4.76114	4.28457	4.56517	4.44351	4.67339	4.51763	4.37164	4.574	4.20449	4.58609	4.19261	4.17209	4.30298	4.86899
ANKRD26	11736320_at	3.7109	3.05401	3.63109	4.02785	3.61107	3.75338	3.6591	3.19451	3.1674	3.8978	3.70823	3.45356	3.6591	3.60648	3.48448	3.50878	3.46109	3.78156	3.49881	3.69745	4.37183	3.75299	3.51067	3.19644	3.7742	3.59304	4.02699	3.50089	3.52229	3.72144	3.76419	3.58697	3.45525	3.87356	2.896	3.2717	3.38353	3.59608	3.89724	3.68611
ANKRD27	11718258_at	7.85381	6.606	6.86577	6.7944	6.60336	8.22092	6.38668	7.28901	6.82823	7.42562	7.17292	7.53248	7.29031	7.09795	7.37227	7.23692	6.48856	7.32878	6.94659	7.45736	7.82307	7.40045	7.21668	7.33384	7.46531	7.18928	7.10911	7.68029	7.30986	7.27973	6.89051	7.37213	7.2024	7.16388	7.25784	7.30547	7.55	7.32747	7.6485	7.21522
ANKRD28	11752240_a_at	3.91718	2.70595	2.95473	2.80581	2.46865	3.50084	2.45827	2.83339	2.65447	3.07462	3.05396	2.99375	2.85725	3.11876	2.89428	3.02242	3.13094	2.77175	3.3641	2.79468	2.81484	2.8477	2.63296	2.68561	2.74574	2.84675	3.11074	3.37601	2.85028	2.86057	2.65706	3.13549	3.10314	2.6902	2.74134	3.01661	2.65884	2.83662	2.98118	2.90101
ANKRD29	11744242_a_at	1.89437	2.09394	2.05361	2.0325	2.36299	2.07384	2.0603	2.24018	2.24414	1.9794	2.29854	2.21114	2.20923	1.95888	2.11016	2.02063	1.90804	2.01047	2.13538	2.09877	2.11482	2.22389	1.77112	2.00958	1.98633	1.99306	1.96757	2.08405	1.99226	2.03845	1.96449	1.98741	1.95105	2.3531	2.04322	1.96449	1.8885	2.15408	2.09884	1.88993
ANKRD30A	11740627_at	1.82237	2.33403	2.10738	2.08528	1.88693	1.82603	2.22349	1.81902	2.18958	2.182	2.09872	1.95793	2.00454	2.38728	2.13774	2.21663	2.29528	2.29046	2.23153	2.31692	2.10302	2.23903	2.22702	2.05648	2.22216	2.16646	2.34463	2.06537	2.15441	2.08187	2.20473	2.01627	1.93689	2.0906	2.03142	2.16277	1.99343	2.22349	2.04289	2.00665
ANKRD30B	11738169_x_at	1.90237	2.0184	2.44976	2.43625	1.90169	1.96163	2.27677	1.97553	2.38427	2.17284	1.9052	1.93952	1.94224	2.25306	2.09456	2.02528	2.09525	2.06106	2.06494	1.99974	2.20136	2.04391	2.17185	2.11954	1.92866	2.1607	2.04391	1.91681	2.03687	2.06795	1.8054	2.27917	2.22026	2.04189	1.99959	2.04348	2.09619	2.03026	1.8726	2.16947
ANKRD33	11743798_a_at	3.51768	3.39014	4.1215	3.87229	3.8727	3.62431	3.8342	3.51612	3.72034	3.37811	3.27941	3.26897	3.54563	3.5412	3.72241	3.9122	3.78399	3.664	3.6691	3.49995	3.13733	3.64995	3.41561	3.33342	3.47178	3.56572	3.87078	3.39895	3.58942	3.54547	3.56834	3.71754	3.49827	3.79312	3.33004	3.65425	3.39014	3.35069	3.55693	3.59787
ANKRD34A	11725536_at	3.73222	5.01199	4.88926	4.68313	5.0881	4.58363	4.99822	4.36863	5.10269	4.50193	4.43002	4.55393	4.25426	4.89062	4.72578	4.91311	4.96638	4.73959	5.04654	4.74014	4.79282	4.85837	4.56074	4.59924	4.56758	4.63193	4.6426	4.49997	4.79236	4.6052	4.79651	4.65752	4.50117	4.93214	4.3427	4.24159	4.35421	4.45157	4.66301	5.09863
ANKRD34B	11737166_at	3.14208	3.82996	5.19951	2.84127	2.72933	2.22812	2.86556	4.9291	2.72929	3.76104	3.08129	3.00115	2.96522	4.38736	3.18771	3.67974	2.53724	3.45605	2.86198	3.76262	5.54425	3.04033	3.40316	4.42404	3.40012	2.9776	3.00914	3.05657	4.23889	3.59502	2.39844	3.56139	5.01924	3.07914	4.04625	4.42114	4.29139	4.74436	3.96743	3.35591
ANKRD34C	11755431_s_at	3.16465	3.38598	3.6338	3.28619	3.67006	3.32816	3.87969	3.35757	3.44515	3.2365	3.22358	3.42937	3.11867	3.52024	3.42049	3.6237	3.81374	3.36048	3.78025	3.22805	2.825	3.20263	3.48988	3.39527	3.44376	3.42761	3.21628	3.33018	3.46963	3.46088	3.23804	3.31804	3.28058	3.03684	3.13984	3.35568	3.19471	3.17717	3.3691	3.44136
ANKRD35	11750063_a_at	3.57962	4.28282	4.09042	3.99099	4.03904	3.39024	4.6205	3.6027	4.13959	3.33221	4.11956	3.55924	3.61349	3.72004	4.02032	3.76522	4.23101	3.87007	4.01052	3.32694	3.63077	3.6266	3.71586	3.1852	3.81076	4.15496	3.74451	3.50485	3.65887	3.59805	3.85558	3.70696	3.50943	3.67357	3.53753	3.978	3.01884	3.53422	3.43916	3.70729
ANKRD36	11745320_x_at	3.1236	2.24347	2.13944	2.17193	2.30258	3.01439	2.18378	2.30603	1.99185	2.34117	2.29854	2.80164	2.32142	2.31875	1.96473	2.01733	2.14628	2.15104	1.95538	2.18392	1.81022	2.64548	2.08971	2.21948	2.34248	2.20815	1.90362	2.40557	1.71429	2.02883	2.09735	2.36052	2.15058	1.79299	2.25691	1.90668	2.18655	2.2783	2.65562	2.17786
ANKRD37	11760650_a_at	2.13883	2.07374	2.19826	2.27215	2.13484	2.05256	1.93788	2.36302	1.83826	2.02545	2.08969	1.86561	2.00454	2.05212	2.30312	2.07099	2.09165	2.14464	2.07461	2.09349	2.04759	2.14129	2.11161	2.13689	1.97553	2.34169	2.56039	2.41446	2.30248	1.92989	2.43764	2.04505	1.96978	2.32402	2.19176	2.12214	2.34594	2.05452	2.3841	2.39864
ANKRD39	11726350_at	4.0599	4.4778	5.07547	4.57746	4.85634	4.25994	4.68966	4.04408	4.40972	4.35999	4.14105	4.44205	4.04008	4.40048	4.41083	4.48482	4.45993	4.20106	4.25268	4.62362	4.72202	4.25031	4.63586	4.63612	4.6651	4.40545	4.39902	4.47611	4.68079	4.54495	5.12491	4.50473	4.10866	4.26128	4.24346	4.36241	4.39527	4.27766	4.22991	4.26548
ANKRD40	11719903_at	5.07772	4.66301	4.2195	5.28952	4.68809	5.12801	4.61268	4.22553	4.06933	4.40403	4.39319	4.96451	4.61966	4.58504	4.28179	4.5528	4.52009	4.701	4.43067	4.79468	4.19633	4.8121	4.92653	4.62902	4.94036	4.81048	4.63336	4.52513	4.70379	4.48107	4.9224	4.81602	4.49646	4.54293	4.49794	4.80278	4.75036	4.73336	4.47494	4.49828
ANKRD42	11741708_at	3.59255	3.79108	3.58554	4.04039	3.41678	3.90523	3.65331	4.42905	3.92553	3.28358	3.62429	3.69143	4.08558	3.63438	3.69417	4.09206	3.79393	3.88548	3.72569	3.32195	4.05756	3.74814	3.82735	3.87054	3.81459	3.53065	3.52562	3.87919	3.8132	3.7435	3.74901	3.81668	3.87328	3.54119	3.86562	3.81447	3.78526	3.70052	3.55511	3.74476
ANKRD44	11761036_at	2.61313	2.65363	3.06658	3.04168	2.86586	2.37533	2.98202	2.83231	2.62321	2.25364	2.68097	2.45281	2.6787	2.98289	2.99699	2.73448	2.75759	2.53724	2.92576	2.86694	2.53638	2.63259	2.57149	2.56037	2.64771	2.86136	2.71363	2.79113	2.37277	2.52235	2.85504	2.61373	2.78133	2.55554	2.67279	2.62796	2.12652	2.53205	2.3798	2.81615
ANKRD45	11736901_at	2.50702	3.12441	3.01055	3.35765	2.97012	2.79421	3.04365	2.8996	3.23407	2.89495	2.89109	3.09177	2.90486	3.26196	2.96881	2.91111	3.20729	2.80989	3.5163	3.009	2.61774	2.92386	3.00637	2.89537	2.83164	2.99672	3.09226	2.76555	2.96989	3.09537	3.00061	2.70659	3.06868	3.07775	2.57097	3.09941	2.80485	2.7747	2.91377	3.11141
ANKRD46	11757989_s_at	6.68567	4.82085	4.61559	3.67257	4.66816	6.2426	4.64175	5.07512	4.78036	6.29886	5.48785	5.01414	6.23996	5.5329	4.70496	4.97374	5.22497	5.47905	4.9445	5.91696	5.47454	5.51645	5.279	5.56997	5.4255	5.44977	4.6253	5.90175	5.18478	5.40913	5.23632	5.83277	5.45061	6.02185	5.73023	5.39639	5.52707	5.81677	6.05905	5.01209
ANKRD49	11758059_s_at	8.06291	7.2268	7.38938	6.57927	7.39591	7.65291	6.73256	7.755	7.58781	8.4481	7.57488	7.67585	8.34232	7.85597	7.10561	7.21911	7.38042	7.66174	7.18203	8.30729	8.02689	7.7357	7.76615	7.86292	7.94895	7.95897	7.594	8.36978	7.49826	7.84582	7.26654	8.16603	8.12678	7.9698	8.43726	7.93618	8.2225	8.09047	8.24327	7.4362
ANKRD50	11742909_at	3.9348	3.15622	3.00161	3.04816	3.15129	4.51591	2.22062	3.16376	2.77716	4.64433	4.01829	3.14976	4.31956	3.84271	3.49795	3.1513	3.35633	3.31761	3.05411	3.44982	4.75876	3.76125	4.09317	4.42458	3.84318	3.55532	3.78931	3.18396	3.26135	4.04002	3.65616	3.3582	4.15603	3.16523	3.67435	3.82576	3.59083	4.33124	3.04181	3.07287
ANKRD52	11730351_at	6.43288	7.66576	7.43267	7.64304	7.57517	7.21421	7.77903	7.23598	7.53045	6.77954	7.20327	7.03288	6.98712	7.3328	7.3185	7.35079	7.71172	7.13694	7.71998	7.16762	6.82428	7.42514	7.05713	7.1205	7.14473	7.3915	7.34837	6.99419	7.10163	7.21132	7.42741	7.13326	7.15409	7.3142	6.94768	7.26785	6.74278	7.029	6.87822	7.52807
ANKRD53	11742121_a_at	3.82373	5.12749	5.11316	5.18837	5.40265	4.15819	4.83676	4.46271	5.10029	4.66473	4.20459	4.5857	4.19496	4.66442	5.08305	4.73853	5.26335	4.3761	5.04148	4.48997	4.19311	4.41299	4.53748	4.4978	4.49	4.84693	4.56149	4.3357	4.64722	4.62279	4.63486	4.4201	4.44117	4.64029	4.38709	4.73311	4.20591	4.48214	4.12934	4.94774
ANKRD54	11755056_a_at	5.77783	5.30887	5.47213	5.29604	5.15649	6.23426	5.71028	5.94476	5.45724	5.16536	5.27797	6.12402	5.69194	5.61325	5.43622	5.36111	5.61503	5.38441	5.34711	5.61176	5.50659	5.74957	5.1984	5.52153	5.4808	5.27654	5.28157	5.16767	5.52955	5.5303	5.57357	5.6248	5.33019	5.53197	4.83291	5.29633	5.18852	5.27172	5.72906	5.7407
ANKRD55	11743782_a_at	4.82703	6.50809	6.35021	6.33924	6.04865	4.86724	5.89477	6.40594	5.81907	5.66025	6.22882	6.39805	6.29296	6.00797	6.30215	6.44338	6.20863	6.14068	6.0391	6.19462	6.01978	5.96227	6.05198	5.78325	5.82008	5.84402	6.0785	6.48589	5.79949	5.96415	5.45541	5.8984	5.80466	6.54373	5.86349	5.72757	5.81679	5.98175	6.45726	5.58894
ANKRD6	11754565_a_at	2.95705	2.89328	2.66883	2.66825	2.5004	2.64051	2.71097	3.48608	2.91274	3.5304	3.08095	2.99155	3.15807	2.90528	2.92008	2.87559	2.62645	2.946	2.96591	3.20125	4.09481	3.00314	2.7517	3.57323	2.96591	2.51589	3.20263	2.92659	2.62326	3.11076	2.72922	2.62471	3.72411	2.59741	3.27795	3.04724	3.21954	2.56476	3.36496	2.5738
ANKRD65	11732653_x_at	3.6612	4.78526	4.86482	5.14712	4.64608	4.41762	5.03218	3.85299	4.40792	3.99907	4.62566	3.85824	3.84294	4.63751	4.5263	4.28246	5.05258	4.34549	4.60667	4.21664	3.82222	4.16104	4.18224	4.28069	4.42967	4.67301	4.65613	3.95655	4.34515	4.33634	4.51628	4.26164	4.35173	4.29413	4.04169	4.32249	3.72236	4.16996	3.92921	4.68222
ANKRD66	11745295_a_at	2.99905	3.41483	3.36952	3.17205	3.30289	2.73491	3.43307	3.15619	3.04546	3.17493	3.35071	3.38446	3.21548	3.03307	3.07972	3.03283	2.98299	2.6717	3.82295	2.89706	3.53634	3.24844	2.80782	3.2823	3.02805	2.73813	3.22574	3.11042	3.08452	3.34747	3.32798	3.34256	3.02294	2.79832	3.40056	3.17399	3.11347	2.95792	2.97937	3.32907
ANKRD7	11721492_a_at	2.01132	2.72405	2.40131	2.75443	2.72443	2.19252	3.19474	1.86363	2.49626	2.48749	2.08631	1.86146	2.11705	2.27296	2.47761	2.34773	2.54616	2.40264	2.61854	2.19348	2.48463	2.13314	2.20878	2.07759	2.30075	2.27296	2.76769	2.59777	2.24489	2.18663	2.21197	2.1271	2.16909	2.31511	2.0035	2.27857	1.73296	2.31727	1.9053	2.61313
ANKRD9	11734041_x_at	5.55625	7.53868	7.47411	7.43052	7.46756	6.63257	8.06858	6.30431	7.56264	6.65384	5.88497	6.29098	5.57631	6.68257	6.26415	6.30947	7.13972	6.58272	6.94268	5.96832	5.67349	6.20362	6.20354	6.11483	6.18898	6.17226	6.20543	5.86264	6.27168	6.38319	6.26326	6.27453	6.36839	6.49052	5.63943	6.48494	5.07251	6.03672	5.50055	6.63964
ANKS1A	11747229_a_at	3.47414	3.33527	3.38248	3.38503	3.17986	3.1129	3.47664	3.29511	2.99191	3.16438	2.91919	3.21107	2.63289	3.10816	3.48979	3.23819	3.45195	3.16144	3.10383	2.79671	2.86548	3.30887	3.32878	3.24646	2.95554	3.14029	3.42381	3.10237	3.19385	3.24731	3.379	3.35724	3.42374	3.16715	3.27384	3.18861	3.40366	3.10251	2.97966	3.4817
ANKS1B	11760427_x_at	1.76385	1.781	1.66793	1.84882	1.78567	1.9158	1.65612	2.03113	1.94708	1.79222	1.73952	1.64807	1.56157	1.65423	1.7076	1.54556	1.71936	1.73203	1.8005	1.54282	1.85302	1.69015	1.63211	1.56021	1.66932	1.60966	1.84882	1.77967	1.80474	1.76672	1.72083	1.87472	1.60688	1.84215	1.71674	1.63034	1.75947	2.04821	1.75405	1.72103
ANKS3	11750877_a_at	4.58917	5.17246	5.04365	5.15451	5.1792	5.03005	5.29824	4.79282	5.26698	4.76736	4.54649	5.33398	4.44756	4.95709	4.77248	4.99597	5.14643	4.8973	5.1787	4.95546	4.54496	4.80534	4.77147	4.84554	5.06406	4.88893	4.89746	4.84536	4.81502	5.09541	5.16467	4.96763	4.56036	5.042	4.85875	4.97021	4.32066	4.83143	4.83247	5.16183
ANKS4B	11737257_at	1.8901	2.18867	2.39238	2.754	2.56833	2.35449	2.60905	2.16493	2.22544	1.92409	1.82509	2.17885	1.44778	2.23419	2.40071	2.08944	2.29356	2.2263	2.54344	2.17034	1.99612	2.21655	2.19276	1.97743	2.31043	2.17473	2.27321	2.04562	2.05727	2.10162	2.19822	2.11482	2.05727	2.05568	1.77831	2.22283	1.9363	1.91348	1.70072	2.2902
ANKS6	11725287_a_at	4.86503	5.33782	5.0414	5.25291	5.2982	4.94719	5.52322	4.68642	5.11637	4.90695	4.87974	4.68191	4.55149	5.01415	4.71956	5.09803	5.19	4.73285	5.25759	4.72332	4.76579	4.69344	4.57567	4.74022	4.68219	5.15262	4.74743	4.85644	4.79701	5.00008	4.85445	4.75362	4.79526	4.73393	4.56352	4.98738	4.33774	4.48265	4.66301	4.83774
ANKUB1	11738362_a_at	1.96807	1.87162	2.00824	1.9998	1.68764	1.96943	2.36861	1.86096	2.08374	1.64921	1.98889	1.8181	1.65061	1.95683	1.87603	1.71583	2.16435	2.03307	1.93142	1.77658	1.85281	1.97629	1.9513	1.78356	1.91884	1.69077	1.76473	1.78969	1.74794	1.84648	1.96932	1.69265	1.82628	2.01071	2.02928	1.84454	1.67991	1.98174	1.75019	1.78962
ANKZF1	11760257_a_at	4.23974	5.21554	4.77848	4.72121	4.99563	5.38806	4.57822	4.86751	5.65516	5.00953	6.03826	6.02584	5.8751	5.12736	5.70197	5.6473	5.02937	4.97572	5.13928	5.82213	5.27741	5.44399	5.33376	5.39385	5.03003	5.11634	5.59809	5.76416	5.49742	5.47817	4.76075	5.63711	4.60807	5.34224	5.67586	4.70312	5.46354	4.98015	5.70093	5.01732
ANLN	11724464_a_at	3.95545	2.12508	2.8645	2.558	2.26345	4.8437	2.86556	2.25123	1.79954	2.45577	3.42828	2.63462	2.29917	2.57486	1.95847	2.08653	2.10366	2.14167	2.01707	2.07399	2.54463	2.16862	2.07842	1.88044	2.54896	2.11191	2.11954	2.12868	2.31333	2.00443	2.31114	2.70528	2.33554	2.23804	3.07036	2.58168	2.52632	2.66352	1.93291	2.2724
ANO1	11723830_x_at	1.73319	2.01166	1.6885	1.79636	1.9269	1.96922	1.94414	2.12569	2.0117	1.8461	1.91772	2.14834	2.06275	1.88796	1.90993	1.8484	1.89936	1.73847	1.8833	2.09344	1.99119	1.82413	1.91697	1.90993	1.9056	2.04585	1.95054	1.84645	1.85915	1.8255	1.76565	1.79405	1.94056	1.87518	1.88696	1.74353	1.88507	1.7239	1.80252	1.80408
ANO10	11721057_a_at	5.80125	6.67731	6.22907	6.39032	6.55374	5.98089	6.78188	6.18961	6.31702	5.87233	5.73224	5.61943	5.83497	5.89475	6.03203	6.14094	6.37532	5.97315	6.46683	5.90378	6.15606	5.99611	5.91355	6.04647	5.89596	6.21398	6.08827	6.05108	5.937	5.79323	6.18273	6.00464	6.15373	5.94683	6.04666	6.24215	5.77665	6.0216	5.55915	6.13562
ANO2	11726908_a_at	2.76361	3.85746	3.17658	3.8451	3.52205	3.15686	3.65991	2.84646	3.33468	3.08206	2.83905	3.01357	2.86919	3.15523	3.17482	3.40068	3.73239	3.24583	3.39506	2.75667	2.46486	3.49881	3.03034	3.18297	3.12733	3.47495	3.26101	2.73851	3.14269	3.17436	3.07531	2.97829	3.14294	2.96618	2.89703	3.17439	2.80718	3.087	2.98602	3.20149
ANO3	11730650_at	2.01911	2.20776	2.36883	2.23211	2.13484	1.92309	2.60385	2.28169	2.5189	2.18706	2.4108	2.33978	2.14137	2.16274	2.18387	2.12703	2.54001	2.14639	2.0924	2.06006	2.14508	2.32963	2.10959	2.03984	2.09353	2.10027	2.02326	1.89052	2.11732	2.17982	2.14508	2.31233	2.19042	2.24692	1.91152	2.12742	2.10951	2.07217	2.28286	2.41339
ANO4	11728394_a_at	2.20097	2.65821	2.80474	2.56501	3.33443	2.08953	2.77756	2.66982	2.54812	2.48656	2.41569	2.59801	2.37474	2.50544	2.58659	2.94278	2.47856	2.62413	2.52835	2.41177	2.39398	2.56914	2.22093	2.48738	2.34615	2.62413	2.69097	2.63887	2.7915	2.63588	2.73708	2.45119	2.60905	2.25366	2.48404	2.35337	2.34212	2.41421	2.36932	2.62442
ANO5	11726500_s_at	1.95943	2.51094	2.40148	2.54768	2.25322	2.09734	2.23462	2.34295	2.78493	2.67835	2.43752	2.49377	2.31053	2.56734	2.30522	2.32727	2.67039	2.1142	2.47185	2.19817	2.51607	2.28031	2.4009	2.25834	2.45316	2.35178	2.43913	2.30042	2.24906	2.34695	2.49106	2.51771	2.52683	2.27564	2.42728	2.72041	2.94694	2.85888	2.21662	2.36482
ANO6	11742054_a_at	2.22594	2.45504	2.27565	2.71673	2.28697	2.51758	2.75196	2.2104	2.72329	2.24105	1.98928	2.33342	2.64099	2.23239	2.37508	2.36839	2.38541	2.35827	2.46959	2.61762	2.47368	2.15742	2.41724	2.31524	2.57781	2.0258	2.01101	2.64935	2.19583	2.66958	2.38989	2.4529	2.47368	2.55554	2.46204	2.40748	2.22466	2.43072	2.33073	2.29115
ANO7	11755890_x_at	2.98051	3.2601	3.25215	3.38572	3.31534	3.26759	3.97311	3.31754	3.37066	2.88294	3.19455	3.34965	3.4317	3.349	3.20974	3.28401	3.40805	3.28449	3.26091	3.21694	3.20743	2.91491	3.21844	3.16545	2.9364	3.28195	3.20263	2.96073	3.29188	3.24788	3.20932	2.98031	3.18558	3.1521	3.19055	3.19117	3.07919	3.20668	3.1045	3.24085
ANO8	11756319_a_at	4.22933	5.0749	4.84975	5.38601	5.58744	4.80915	5.20507	4.55057	4.29393	4.49406	4.51853	4.68364	4.61966	4.76622	4.66047	4.99266	4.77485	4.7509	5.05182	4.73853	4.89992	4.9735	4.48552	4.44923	4.4341	4.84155	4.74381	4.39633	4.57149	4.53179	4.69921	4.76329	4.57563	4.71393	4.32457	4.66047	4.51138	4.73714	4.65943	4.84338
ANO9	11747694_a_at	3.2461	4.12076	4.05714	3.99759	4.20791	3.68007	3.99636	3.7341	4.08909	3.37681	3.99284	3.94733	4.04833	3.52105	4.07437	3.57015	3.84512	3.72499	3.97752	3.36632	3.73047	3.58003	3.72413	3.67941	3.40355	3.62745	3.17053	3.66841	3.67778	3.70309	3.85857	3.73243	3.28254	3.78672	3.72948	3.73755	3.32197	3.87229	3.52282	3.96192
ANOS1	11726396_x_at	2.17478	2.69243	2.74482	2.70783	3.14005	2.60073	3.02466	2.30323	3.20212	2.39643	2.40307	2.68579	2.18234	2.40305	2.6097	2.33388	2.69391	2.45873	2.61854	2.99033	3.14802	2.50983	2.59394	2.53516	2.70637	2.34329	2.40307	2.23451	2.27327	2.61494	2.28065	2.24762	2.49367	2.46909	2.96734	2.89967	2.41096	2.33437	2.09803	2.44081
ANP32A	11739079_a_at	7.32188	4.51519	5.45405	4.86269	4.8722	6.0685	4.07224	6.58259	4.75489	6.6075	6.70527	6.60565	7.15756	6.57547	6.55325	6.7023	5.51436	6.57999	6.16832	6.58283	7.61303	6.36795	7.01116	7.16305	6.98067	6.28835	6.58871	6.38361	6.90965	6.67794	6.30517	6.63124	7.1251	6.32665	6.92157	6.56676	7.06062	7.01996	6.93389	5.87679
ANP32B	11756300_a_at	9.29865	9.02082	8.95098	8.40434	8.72815	9.52686	9.3384	8.17066	8.99275	8.70556	8.34226	8.39035	8.79573	8.63807	8.12473	8.27983	8.48169	8.64347	8.5041	8.44921	8.08029	8.42021	8.22967	8.10662	8.37249	8.34472	8.25413	8.36477	8.16929	8.45861	8.49567	8.65985	7.97561	8.50797	8.34109	8.28026	8.45378	8.67377	8.74355	8.30939
ANP32D	11738965_x_at	1.76197	2.09721	2.01243	2.47939	2.78184	2.02539	2.22497	1.99418	1.92815	1.9954	2.18037	1.83671	1.73104	1.99542	2.15317	2.01133	2.48796	1.96914	2.08992	2.06718	2.16668	2.03337	1.97443	1.95321	1.98012	2.05787	2.08772	1.86338	2.0554	2.10752	2.13471	1.89287	2.11743	2.28709	2.03745	2.15215	1.87284	1.98297	1.89994	2.3798
ANP32E	11749393_a_at	6.05852	4.00326	6.14302	4.56361	4.13342	5.78688	4.99872	4.03504	4.85644	5.4923	5.86191	4.66812	6.02683	5.33111	4.57558	4.82977	4.6698	4.97389	4.23683	5.28538	5.35419	5.02288	5.24938	4.7464	5.66816	4.57659	4.45041	5.58359	4.93837	5.12983	5.34736	5.88633	4.87317	5.03274	5.29633	5.20939	6.08311	5.68317	5.29581	4.96798
ANPEP	11746965_a_at	6.25556	7.7665	7.46252	7.65731	6.45349	5.487	6.3333	8.40029	7.07632	6.33152	8.32444	8.40016	7.47091	7.39828	8.60338	8.46789	7.0253	7.30923	8.01976	7.54805	8.58182	7.5532	7.85076	7.95183	7.19823	7.35091	7.68092	7.38324	8.08113	7.87427	7.8155	7.2055	8.64587	7.23685	8.26575	7.68604	7.39776	7.50061	7.71758	7.3588
ANTXR1	11738857_at	2.45577	2.84212	2.91295	3.04546	3.10178	2.29677	3.07745	2.49946	2.48397	2.3677	2.50152	2.11804	2.25729	2.4339	2.37962	2.49695	2.47861	2.36225	2.61668	2.45082	2.20007	2.67972	2.37722	2.42286	2.56034	2.69897	2.56011	2.65189	2.5038	2.68995	2.58983	2.13774	2.29668	2.639	2.20887	2.64557	2.50047	2.42079	2.40032	2.79629
ANTXR2	11736046_at	3.80831	3.03256	3.2569	3.15045	3.12799	2.77414	3.19024	3.13815	3.10538	3.08206	3.26104	3.11579	3.32333	3.08105	3.23213	3.07247	3.0612	3.12727	3.18181	3.47831	3.98608	3.30864	2.9639	3.07426	2.84095	3.19108	3.06878	3.47967	3.13604	3.16009	2.59391	2.83925	3.2154	3.1715	3.43451	3.15403	3.14815	2.86725	2.7975	2.8069
ANXA1	11759797_at	4.20081	4.63215	4.3898	3.57028	3.43944	3.35391	3.45877	4.28747	4.23541	4.14957	4.38736	3.77202	5.29393	3.85693	3.78645	3.90221	3.81905	4.08531	3.77086	4.35475	4.86862	3.89003	3.63842	3.94138	4.07915	3.93182	3.96722	5.11194	3.94322	3.84872	2.91051	4.40502	4.08909	3.69769	3.72594	3.83313	4.22478	4.6585	3.95733	3.34527
ANXA10	11724372_at	2.44707	2.80257	2.66652	3.03132	2.59307	2.60779	2.79003	2.91402	2.98178	2.51911	3.01366	2.53661	2.30953	2.24969	2.64825	2.76601	2.96253	2.70689	2.67271	2.38422	2.27954	2.46673	2.57071	2.61019	2.58943	2.56534	2.43472	2.46845	2.56007	2.60115	2.7472	2.50212	2.40174	2.77095	2.74009	2.66315	2.44051	2.3896	2.5724	3.03269
ANXA11	11741351_s_at	6.27789	5.62086	5.84412	5.7126	5.6088	5.7406	3.95449	7.08183	5.81224	6.60518	6.95248	7.00563	6.59881	6.5547	7.38194	7.14333	6.0117	6.70188	6.8267	6.62161	7.24882	6.56331	7.06474	7.2221	6.56054	6.4588	7.46246	6.79785	7.1947	6.87171	6.90495	6.54262	7.17747	6.81636	7.26887	6.73055	6.94993	6.82139	7.0652	6.57319
ANXA13	11741559_a_at	3.06293	3.26478	2.82072	3.07406	3.03158	2.87016	3.09188	3.06606	3.58463	2.82006	2.95478	2.79639	3.09652	3.09594	3.03776	2.9368	3.27601	2.95913	3.07747	2.96183	3.02733	3.06415	2.73247	2.65195	2.928	2.94851	3.06046	3.08373	2.79604	3.04821	2.86589	2.97235	2.86245	2.83787	2.72435	3.07522	2.85733	2.90376	2.85239	3.13094
ANXA2	11738551_a_at	4.67425	4.79213	4.98045	4.73767	5.01696	4.55778	4.71904	4.15519	4.00706	4.56097	3.9218	4.37709	3.97604	4.95286	4.45194	4.95525	4.57116	4.61462	4.98073	4.43514	3.94188	4.42024	4.60405	4.74054	5.04322	4.88237	4.7962	4.41246	4.55393	4.78279	4.49563	4.74324	4.95061	4.53012	4.05682	4.932	4.39917	4.69055	4.44161	5.11377
ANXA2R	11725782_at	7.18179	6.76462	6.75615	6.63782	6.89082	6.82817	6.7763	6.29123	6.72472	6.97801	6.75055	7.00734	7.21184	6.77895	7.04925	7.20843	6.79634	7.07488	6.80077	7.30098	6.67159	6.96157	7.42744	6.7713	7.25137	6.86287	7.22924	7.40608	6.93906	6.93121	7.22325	6.98065	6.42551	7.24303	7.09474	6.89205	7.13575	6.84075	7.7698	6.79225
ANXA3	11724283_a_at	8.96034	7.8913	8.678	8.34434	5.7954	5.95695	5.93373	7.15377	7.00042	7.06087	7.166	6.28575	6.14432	7.58757	7.25309	7.03242	5.89525	7.32745	7.16912	7.28735	8.42326	6.39704	7.69453	8.76467	6.24245	6.60978	8.49208	6.46752	7.6639	7.11746	7.37489	7.64338	9.39204	6.42355	9.43279	6.75512	7.39906	7.32755	6.0942	6.54816
ANXA4	11761845_at	1.8339	2.27897	2.21265	2.26602	2.55117	1.79472	2.34774	2.63674	2.24088	1.9722	1.9551	2.1984	1.9932	2.22349	1.84872	2.07768	2.41521	1.77636	2.283	2.02457	1.88898	1.89632	1.96161	2.04183	1.99845	2.12192	1.93831	1.75429	2.26333	1.9112	1.97627	1.99543	1.94967	2.01955	1.86306	2.27024	2.19116	1.8394	1.73304	2.42663
ANXA5	11759424_at	3.27732	3.99728	4.10649	4.69847	4.74811	3.98208	4.16159	4.69318	4.79875	4.9284	4.53153	4.64691	4.52824	4.46741	4.56407	4.71183	4.56424	4.80419	4.75037	4.44588	5.06737	4.73762	4.58196	4.56762	5.03517	4.70777	4.6934	4.52092	4.65168	4.6539	4.59221	4.77642	4.69618	5.21742	4.87203	5.43047	5.0191	5.29087	4.76	5.07899
ANXA6	11715803_a_at	7.46531	6.86181	6.86288	6.92308	6.88044	7.62483	6.88047	8.01497	7.55951	7.192	7.79022	8.69215	7.97491	7.12039	7.59895	7.54038	6.97751	7.60998	7.49718	7.94083	6.92531	7.77688	7.23708	7.63114	8.01929	7.60569	7.59011	7.89464	7.68057	7.44327	8.23823	8.19016	6.69318	7.65603	7.17592	7.48745	7.86025	7.83202	7.94322	7.80531
ANXA7	11744534_a_at	9.41141	9.00341	8.43447	7.95461	8.79561	8.4683	8.93761	8.15774	9.24461	8.95015	8.8926	8.74836	9.09066	8.60532	8.76887	8.75363	8.07913	8.60999	8.33404	8.66701	8.87724	8.64885	8.73261	8.98292	8.79563	8.48249	8.67725	8.7841	8.932	8.89389	8.31036	8.66087	8.67909	8.38923	8.62215	8.56717	8.98499	8.72664	8.99105	8.12989
ANXA9	11729048_a_at	3.80657	4.68564	4.52775	4.51311	4.64893	4.20012	4.64936	4.25038	4.50719	4.4032	4.66397	4.09906	4.2737	4.41639	4.13478	4.42247	4.45999	4.33047	4.47816	4.31006	3.84527	4.15294	4.34962	4.19155	4.29929	4.28334	4.48175	4.10005	4.26457	4.3831	4.43669	4.19827	4.40652	4.45852	3.73313	4.43994	3.6689	4.54081	3.9857	4.83796
AOAH	11756287_a_at	6.47563	7.69171	8.1677	7.85194	7.24334	5.55222	6.31422	9.1072	7.62189	8.83456	9.21235	9.15539	9.07074	8.55314	8.67859	8.60553	7.37079	8.30621	8.03838	8.475	9.41367	8.23358	8.61451	9.14093	8.98139	8.47429	9.09924	8.25473	8.7551	8.69157	8.52677	8.44236	9.20341	8.3252	8.56455	8.70398	9.20058	9.0129	8.70842	8.03859
AOC1	11719962_s_at	5.79765	7.43714	6.71966	7.10173	7.16972	6.24904	6.89422	6.50102	6.55231	6.22569	5.96394	6.2049	6.02491	6.72719	6.52027	6.626	7.14331	6.64775	6.75248	6.45244	5.8833	6.23123	6.3629	6.42839	6.17041	6.46566	6.50251	6.32245	6.62855	6.48564	6.46728	6.46044	6.93218	6.4839	5.89452	6.50728	5.86619	6.47203	6.27006	6.82227
AOC2	11729504_a_at	5.03494	5.49003	5.42716	5.97382	6.00607	4.9373	6.07974	6.26048	5.69825	5.84476	6.01103	6.06033	5.8023	6.08112	6.70842	6.72847	6.32679	6.17589	6.51553	6.32481	6.62637	6.21762	6.00874	6.38845	5.50695	6.2714	6.992	6.19318	6.53908	6.31098	5.62674	5.44767	6.84739	6.23447	6.41243	6.18168	6.25685	6.32832	6.74728	6.08142
AOC3	11725300_a_at	3.05039	3.3955	2.90185	3.63569	3.94658	3.11083	3.17086	4.20698	2.90861	3.77521	4.25332	3.98942	4.00446	3.88162	4.42098	4.65362	3.90664	3.68634	3.77833	4.39933	5.29214	4.30189	4.06427	4.7076	2.9229	3.81195	4.99971	4.38201	4.49909	4.2083	3.10853	3.43078	4.42947	4.2754	4.82992	3.70779	3.9218	4.345	4.7068	3.65094
AOX1	11756912_a_at	4.82371	5.42232	5.67291	5.52903	5.56328	5.24911	5.47433	5.03678	5.2866	5.00788	4.94873	4.98771	5.03088	5.25786	5.28476	5.24615	5.50136	5.36089	5.52747	5.19771	4.97258	5.31979	5.28259	5.22382	5.10921	5.31177	5.2206	5.2057	5.25972	5.23141	5.04554	5.29	5.11074	5.17526	4.74417	5.02831	4.9481	5.05294	5.18831	5.48407
AP1AR	11741574_s_at	4.03592	2.67112	2.44213	2.8203	2.7616	3.60441	2.60905	2.90111	2.76918	3.78068	3.16117	2.9781	4.25831	3.30239	2.55916	2.81717	2.89818	3.00302	2.6771	3.42149	3.36352	2.62262	3.07559	3.23668	3.25982	2.69095	2.4987	3.27114	2.92857	3.09226	2.75662	3.47227	3.14355	3.13395	3.21569	3.07584	3.92526	3.59168	3.7669	2.80315
AP1B1	11730427_a_at	5.06076	5.9674	5.84933	6.23533	6.11684	5.52728	6.20624	5.8265	5.72001	5.24369	5.52169	5.37138	5.37121	5.60275	5.43313	5.54347	6.00805	5.52025	5.90637	5.38209	5.02802	5.61094	5.04174	5.43148	5.65811	5.80975	5.53108	5.45799	5.5382	5.51195	5.8257	5.50915	5.399	5.5241	5.47833	5.50843	5.31216	5.42801	5.38491	5.8676
AP1G1	11745997_a_at	3.72921	3.71388	3.65571	3.61013	3.86818	3.62566	3.44834	3.44879	3.96254	3.6336	3.94833	4.16977	3.62919	3.57681	3.71628	3.55924	3.51698	3.71226	3.5409	3.48848	3.54276	3.49041	3.65522	3.6105	3.36724	3.80135	3.51698	3.93442	3.80354	3.77461	3.59937	3.78024	4.01249	3.54845	3.98487	3.84899	3.92237	3.7424	3.50629	3.61978
AP1G2	11736578_a_at	6.97521	6.10524	5.27357	5.34159	5.89907	6.04012	5.27282	6.76236	6.19313	5.71564	6.35089	7.37059	6.87398	5.89402	6.31865	6.74256	5.66136	5.95527	5.7934	6.40156	6.78649	6.31758	6.13224	6.35241	6.45735	5.91181	6.37558	6.46908	6.24105	6.54857	6.76435	6.43058	6.25473	6.603	6.18424	6.03894	6.76804	6.31868	7.18511	6.15674
AP1M1	11747500_a_at	5.3405	5.14477	5.21854	5.4231	4.34542	5.50272	5.4639	5.68611	5.61683	5.38205	6.12813	6.16501	5.99146	5.4652	5.97176	5.82116	4.8927	5.69381	5.37603	5.78813	5.92627	5.55725	5.88137	5.54381	5.94506	5.65525	5.9318	5.86345	5.6761	5.78301	5.94767	5.67969	5.3945	5.73979	5.51417	5.49131	5.64749	5.64208	5.69621	5.64688
AP1M2	11717062_at	4.45338	5.18366	5.03752	5.42522	6.06791	4.72741	5.43546	4.90371	4.85644	4.38089	4.83873	4.99021	4.26064	5.07411	5.19267	5.37939	5.16723	5.07155	5.09898	4.82187	4.58242	4.99254	4.72878	4.5973	4.63195	4.88233	4.91951	4.66383	4.66279	5.00454	5.08845	4.91785	4.98881	5.00744	4.69757	4.8299	4.20957	4.4634	4.36544	5.07899
AP1S1	11721476_a_at	2.98665	3.75166	4.06138	4.20378	3.48209	3.91408	3.72178	3.186	4.19067	4.3475	3.69677	3.77202	4.07977	4.11899	3.91408	3.59784	3.95379	3.39314	4.00852	3.93579	2.77121	3.74024	3.59373	3.6452	3.67738	3.49248	3.82937	3.42694	3.90796	3.89706	3.59223	3.58911	3.58619	3.65949	3.81916	4.02951	3.38169	4.32173	3.3249	3.92402
AP1S2	11760778_at	2.60891	2.4697	2.85833	2.80338	2.62993	2.18249	3.15707	2.74008	2.659	2.75805	2.58746	2.41654	2.40429	2.28651	2.64875	2.74853	2.51902	2.90908	2.52836	2.49239	2.94293	2.49456	2.66231	2.4679	2.6321	2.58021	3.03492	2.60318	2.48008	2.72357	2.47984	2.53375	2.61617	2.53428	2.55079	2.20683	2.78649	2.67848	2.43978	2.71092
AP1S3	11761673_at	1.86115	1.74386	1.93831	2.09092	1.814	1.85736	1.80388	2.25123	2.0503	1.88448	1.87177	2.12619	1.91708	1.88647	1.94524	1.88325	2.11284	1.90267	1.78132	1.80351	1.9517	1.79699	2.01124	1.81538	1.75814	1.86881	1.65029	1.86881	1.90708	1.74345	1.7766	1.927	1.87965	1.84542	2.04322	1.85797	1.90135	1.787	1.71348	1.70694
AP2A1	11748811_a_at	2.87236	4.25733	3.9849	4.35519	4.25989	3.46839	5.41121	3.55912	4.30547	4.10128	3.39052	3.58535	3.64077	3.46547	3.56193	3.61058	3.8362	3.57181	4.18272	3.45476	3.40843	3.38843	3.57513	3.7385	3.79378	4.08238	3.74081	3.54729	3.70788	3.77947	3.72319	3.50311	3.76454	3.70773	3.99039	3.90029	3.47973	3.55904	3.53004	3.99064
AP2A2	11741017_s_at	6.01193	4.79167	4.40394	3.94751	5.22603	4.99284	4.70079	4.63239	4.98482	4.7512	5.08934	5.2417	5.07961	4.89957	5.17485	5.36148	4.44927	4.83291	4.98524	5.16711	5.61724	5.09057	5.16661	4.98643	5.14097	4.92974	5.12259	4.9426	5.13281	4.9254	5.20507	5.09624	4.73903	4.99603	4.7512	4.74883	4.9545	5.13113	5.10205	4.71326
AP2B1	11716262_a_at	6.40119	8.29415	7.06337	7.78754	7.742	7.05278	8.53101	6.39982	8.34891	6.11937	6.21032	5.35787	5.30436	6.10557	5.8837	5.73325	6.60811	5.94825	6.05219	5.60989	5.83913	5.86163	5.69822	5.68609	5.77751	5.88617	5.57243	5.59674	5.72781	5.54599	5.73093	5.76515	5.71177	5.72333	5.7183	6.08549	5.87034	5.89458	5.744	5.88187
AP2M1	11760517_at	3.542	4.62268	4.601	4.13792	4.98108	4.14532	5.00616	4.09445	4.64194	4.19862	4.17997	4.30477	4.61974	4.25801	4.12604	4.18133	4.90495	4.40274	4.98651	4.44404	4.18395	4.18829	4.1199	4.41245	4.1961	4.57203	4.39632	4.54185	4.32374	4.27147	4.14095	4.33382	4.28868	4.24806	4.06256	4.31616	4.01009	4.20974	4.00074	4.23882
AP2S1	11755456_a_at	7.73105	8.17105	9.20996	8.98076	8.4992	8.08185	9.27826	8.03307	9.1889	8.34821	8.45346	8.37433	8.57751	7.82041	7.79503	7.51553	8.27909	7.80841	8.08044	7.90007	7.72748	7.81655	8.07282	7.58043	8.01901	7.94451	7.83665	7.51999	7.73298	7.98021	8.04149	8.12798	7.92035	7.78898	7.62092	8.1784	8.14144	8.27958	7.72186	7.99688
AP3B1	11719295_a_at	5.99883	4.87023	5.17509	5.00009	4.71318	5.36991	4.59167	5.32613	4.71447	5.63654	5.61114	5.32851	5.34842	5.42734	5.56992	5.42662	4.76827	5.51827	5.21638	5.36543	5.90465	5.60878	5.37819	5.28113	5.50994	5.39458	5.50432	5.49499	5.32414	5.28991	5.30309	5.39788	5.45232	5.29383	5.55044	5.25857	5.45357	5.23178	5.27422	4.82526
AP3B2	11748914_a_at	2.29814	3.12294	2.91925	3.08464	3.06628	2.66514	3.16949	2.68824	3.3762	2.37657	2.5603	2.43269	2.50282	2.67218	2.56161	2.43253	2.93031	2.75863	2.82289	2.57905	2.85726	2.44348	2.45224	2.59158	2.41782	2.88081	2.55656	2.52461	2.73302	2.49145	2.52294	2.57826	2.50354	2.48114	2.37085	2.52253	2.59029	2.49887	2.41357	2.59504
AP3D1	11742928_a_at	7.85385	7.03939	6.96475	6.7743	7.37676	7.64574	6.97611	7.92997	7.22789	7.40467	8.09139	8.37691	8.29721	7.38658	7.86245	7.93054	6.93062	7.44003	7.42204	7.62831	8.11599	7.81295	7.61458	7.87921	7.78493	7.41683	7.57673	7.78916	7.76052	7.7411	8.13049	7.7238	7.33703	7.49784	7.9069	7.64094	8.09433	7.98985	8.06699	7.24634
AP3M1	11729630_a_at	6.01932	4.13887	4.13716	4.01291	3.47594	5.81684	3.46456	5.20073	4.6265	5.69476	5.49445	5.3084	6.07959	5.08893	5.04709	5.29886	4.31789	5.04506	4.49534	5.42499	5.76826	5.381	5.48076	5.22783	5.77199	5.32314	4.57838	5.70237	5.28661	5.58496	4.70174	5.50582	5.4134	4.95171	5.53628	5.98857	6.24283	5.75794	5.80351	4.72729
AP3M2	11749930_a_at	2.74445	2.27117	2.55402	2.61708	2.5344	2.94305	2.40349	2.30232	2.75736	2.4162	2.65943	2.77566	2.83197	2.328	2.2954	2.81717	2.511	2.86036	2.52968	2.65678	1.93601	2.53373	2.54421	2.31138	2.53724	2.71319	2.67829	2.79039	2.38593	2.53575	2.40487	2.68283	2.48927	2.36587	2.60395	2.20246	2.73129	2.48493	2.50307	2.65075
AP3S1	11742902_s_at	8.81682	6.77834	7.49161	6.98519	6.29005	7.75926	6.2228	7.23217	7.20133	8.15323	7.60563	7.75399	8.19581	7.70345	7.22389	7.25387	6.75043	7.5125	7.01007	7.78902	8.00527	7.29803	7.85431	8.21974	7.83105	7.35019	7.64282	7.81598	7.68206	7.81739	7.29922	7.84074	7.94883	7.42029	8.25957	7.82903	7.9775	7.96748	7.88574	7.04786
AP4B1	11761701_at	2.62399	3.17205	3.08225	2.9613	2.93402	2.88124	2.8236	2.61219	3.32035	2.62567	3.01918	3.36963	2.82255	2.98691	3.05891	2.98118	3.2528	2.95771	3.24763	2.77183	3.03971	3.26909	2.73247	2.90379	3.07697	2.95805	2.95401	3.13692	2.78508	3.24787	3.02883	2.74069	2.9392	2.98082	2.96781	3.00601	2.82574	2.78355	2.86463	2.92003
AP4E1	11728633_x_at	2.25609	2.07877	2.16116	2.03537	2.14917	2.12414	2.14445	2.40274	2.11894	1.95298	1.94774	2.41654	2.05881	2.06813	2.16163	2.15958	2.16894	2.21121	2.11055	2.16884	2.60073	2.1753	2.01887	2.10052	1.90256	2.28734	2.13219	1.98071	2.51362	1.97395	2.1856	2.22544	1.91119	2.11756	2.21205	2.19196	2.06532	2.01031	2.11104	2.10545
AP4M1	11751623_s_at	4.27294	2.57343	2.7841	2.32013	2.75521	3.84398	1.89841	2.93305	2.80704	3.18476	2.87284	3.10055	3.41568	2.74679	2.94928	3.08333	2.80112	3.26653	3.35761	2.98937	2.48352	2.99177	2.75966	3.19029	3.67631	3.20652	3.21114	3.37861	3.1899	3.1757	2.78086	3.06034	2.7961	2.50362	2.90934	2.73012	3.20556	3.0755	3.37188	2.73437
AP4S1	11753716_a_at	3.42047	2.91457	3.06011	3.02786	2.99831	3.03392	2.67834	2.93852	2.85908	3.34196	2.94337	3.10466	3.32695	3.06011	2.74354	2.85262	3.06213	3.00284	2.93328	2.91973	2.83063	3.11354	3.01822	3.08868	2.65266	2.95998	2.8846	3.03893	2.65414	3.13624	3.04734	3.61293	2.57024	3.13489	3.33024	2.9206	2.98986	2.8846	3.1751	3.11358
AP5B1	11731000_at	4.16981	4.05469	4.42387	4.73569	4.50417	4.17425	4.55741	5.01681	4.16356	4.61782	4.20296	4.10208	3.71364	4.23808	4.50259	4.56551	4.22069	4.43624	4.56639	3.93749	3.81752	3.73475	4.53337	4.46816	4.25332	4.50675	5.05898	4.51749	4.44313	4.05409	4.40364	4.40502	5.47687	4.40162	5.3077	5.09735	5.41746	4.26062	4.52106	5.38569
AP5M1	11762667_s_at	2.55031	2.17011	2.21154	2.23687	1.89766	2.53507	1.8973	2.44234	1.84512	2.2762	2.60455	2.12677	1.85915	2.18731	2.20567	2.16174	2.17816	2.16665	2.19557	2.19565	2.24647	2.19816	2.28297	2.44367	2.33382	2.22202	2.11954	2.27054	2.0176	2.37093	2.09944	2.20173	2.39917	2.15853	2.48065	2.36385	2.29135	2.22349	2.16665	2.24408
AP5S1	11759064_at	4.40169	4.99507	5.00645	4.84912	4.38336	4.20367	5.28296	4.4563	4.59941	4.23876	4.1139	4.76821	4.12	4.63478	4.61836	4.58429	4.80997	4.33612	4.59505	4.51407	4.628	4.28861	4.77281	4.79354	4.39823	4.36822	4.43176	4.31373	4.59984	4.76821	4.29714	4.5728	4.43609	4.51196	4.55764	4.62299	4.41542	4.38185	4.48599	4.91643
AP5Z1	11762365_x_at	4.87147	6.34222	6.20905	6.20892	6.2855	6.21087	5.61885	5.64522	5.87231	5.52921	5.69587	5.28039	5.56925	6.06359	5.89633	6.21248	5.95575	6.21023	6.37235	5.94138	5.9424	6.19136	5.71635	5.8857	5.7611	5.92333	6.17725	5.90105	6.13519	5.8822	5.90202	5.91337	5.96798	6.05107	5.6005	5.9108	6.21822	5.79146	5.36688	5.59891
APAF1	11741240_a_at	3.06414	3.49652	2.99037	3.48273	3.5516	2.92479	2.75577	3.18478	3.02977	3.42057	3.09536	2.79149	3.22317	3.25857	3.19816	3.37873	3.64241	3.38015	3.30514	3.21204	3.48918	3.31136	2.93218	3.53064	3.1285	3.08789	3.42088	3.06043	3.15288	3.45484	3.22734	3.07097	3.65758	3.24496	3.17663	3.48445	2.89916	3.0696	3.22738	3.18364
APBA2	11727630_s_at	3.73754	5.70189	4.69602	4.08864	4.5099	4.27831	4.38425	4.56003	4.91541	3.85949	4.96753	6.05275	5.63868	4.85048	4.97298	6.42758	4.9578	6.00054	5.24306	5.84966	5.08686	5.60507	5.32169	4.37481	4.57153	5.13229	5.2805	5.3239	4.75113	4.75135	5.14888	5.3386	3.77981	5.51581	5.05994	3.93958	4.39454	5.01472	6.0754	4.46101
APBA3	11755083_a_at	6.00237	6.04948	6.57322	6.39024	6.32482	5.82773	6.15985	6.40276	5.59797	6.13853	6.20736	6.83725	6.38888	6.13117	6.50926	6.56426	5.82314	6.3943	6.30468	6.22937	6.94212	6.57041	6.29897	6.30396	6.58075	6.26404	6.65798	6.36123	6.47488	6.37152	6.4227	6.35394	6.39454	6.39896	6.29459	6.15237	6.77998	6.16299	6.5227	6.30795
APBB1	11760976_a_at	2.25664	3.82222	3.37162	4.0963	4.11845	3.24062	3.98938	3.73455	3.81425	2.82524	3.10656	2.90138	2.48353	3.09758	3.20171	3.05533	3.45348	3.2106	3.59488	3.19075	2.77117	3.2024	3.08699	2.7079	3.23218	3.4295	3.04782	3.01268	3.03634	2.59632	2.80748	3.08271	2.78488	3.45226	2.82524	3.07515	2.60564	2.74684	2.87604	4.07389
APBB1IP	11761034_at	5.69489	5.57272	5.77678	5.44029	5.71062	5.64141	5.93264	6.52074	5.72788	5.89202	6.01513	5.98857	5.93959	5.8168	5.94218	6.09113	5.09965	6.12505	5.61776	6.04031	6.53785	5.92606	6.0686	5.91895	5.891	5.88099	6.38825	6.19072	6.27807	6.02958	5.17809	5.87741	6.79695	5.14366	6.85162	5.90708	6.68307	5.60437	6.27807	5.92127
APBB2	11734817_at	2.30337	2.43477	2.38788	2.16882	2.92186	3.22425	2.49451	2.44866	2.50513	2.06351	2.37956	2.55427	1.9052	2.32983	2.3469	2.34756	2.87284	2.36461	2.53397	2.3148	2.11585	2.31047	2.33825	2.30961	2.1731	2.22087	2.51249	2.23076	2.35288	2.33273	2.45569	2.2407	2.30018	2.38644	2.29299	2.46326	2.0712	2.37641	2.14729	2.61249
APBB3	11748601_a_at	4.92484	5.10816	5.35999	5.34717	5.11194	5.02572	5.22648	5.28674	5.12593	5.07899	5.11057	5.35571	5.25301	5.29619	5.35753	5.49113	5.14069	5.11099	5.3665	5.53549	5.72621	5.12386	5.24852	5.28473	5.13239	5.08643	5.485	5.27033	5.26861	5.22862	5.17584	5.01401	5.34138	5.07845	5.09218	5.47027	5.36415	5.30211	5.4688	5.05387
APC	11731562_s_at	4.58615	4.02535	4.04281	4.39524	4.13478	4.16652	4.44573	3.64472	3.59857	3.91173	3.64529	3.62765	4.14381	4.04763	3.95373	4.05074	3.82549	3.89774	4.35714	4.1048	4.21247	3.92183	3.61511	4.17724	3.92816	3.71014	4.02427	3.92115	3.99222	4.0808	4.13016	4.27414	4.31356	4.36382	4.37848	3.9728	3.89088	4.15431	4.13522	3.87149
APC2	11721745_at	3.93312	5.16105	4.90011	5.22049	4.96037	4.62637	5.19292	4.79593	5.00616	4.58279	4.47429	4.41661	4.26023	4.80053	4.57139	4.69141	5.32837	4.74765	4.88943	4.44692	4.43776	4.60026	4.62605	4.48942	4.72062	4.76483	4.66294	4.65734	4.64743	4.51465	4.83564	4.67669	4.62555	4.63963	4.31233	4.7664	4.09658	4.4432	4.31373	5.07899
APCDD1	11757736_s_at	3.45574	3.3785	3.23933	3.52006	3.50806	4.43016	3.40401	3.47068	2.94524	3.07044	3.9563	3.55354	3.06407	3.31031	3.6396	3.41244	2.98254	3.73821	3.45356	3.25988	3.19121	3.46359	3.587	3.57394	3.1067	3.49557	3.27549	3.32837	3.41714	3.56582	3.70729	3.2873	3.57969	3.5699	3.42043	3.63276	3.93724	3.01185	3.15862	3.03499
APCDD1L	11730423_a_at	4.51184	4.95763	4.88531	5.30958	5.17739	4.88879	5.21067	4.77886	4.96409	4.7085	4.8224	4.46734	4.48754	4.68546	4.56315	4.95525	5.32486	4.92996	5.23854	4.8031	4.15764	4.63795	4.87722	4.76486	4.7678	4.89848	5.07435	4.70188	4.81895	4.98396	4.87606	4.88528	4.70104	4.73418	4.74971	4.71292	4.44662	4.71393	4.79516	4.97397
APCS	11727405_a_at	1.92837	2.43489	2.3965	2.3284	2.02532	2.01732	2.31334	2.66131	2.08374	2.08483	2.07737	2.29711	1.95209	2.2445	2.06756	1.9486	2.15951	2.12052	2.44967	2.16215	1.87711	2.12164	2.00266	2.0393	1.95165	2.07026	2.07118	2.00338	2.02292	2.153	1.76473	2.00561	2.16084	2.10955	2.09232	2.04274	1.89157	1.94841	2.0201	2.5046
APEH	11743131_a_at	7.75858	7.22501	6.56311	7.12316	7.31668	7.54411	7.41935	7.44754	7.22028	7.31196	7.28273	7.62103	7.30785	7.10654	7.49361	7.46502	7.35198	7.21425	7.14817	7.37476	7.21344	7.37413	7.31769	7.38406	7.61467	7.17812	7.3781	7.3086	7.39052	7.31827	7.71335	7.25958	7.10801	7.26576	7.32036	7.27143	7.53456	7.48242	7.59586	7.2756
APELA	11763373_at	1.67656	2.09721	2.01641	2.28215	2.44123	2.03615	2.11482	1.80256	2.20434	2.02443	2.19645	2.04568	1.99142	2.05334	2.04221	1.89041	2.04521	1.96043	2.32401	1.81623	2.34089	1.9193	1.89605	1.9811	1.78703	1.94226	2.10881	1.79465	2.03314	1.86751	1.88453	1.9942	2.09384	1.7704	1.72296	1.98805	1.73605	2.22768	1.93241	2.06547
APEX1	11715398_a_at	10.7609	7.53979	7.46554	7.55485	7.91145	9.58335	7.32825	7.90925	8.00321	8.76574	8.43075	8.78461	9.05939	8.32715	8.28773	8.46645	8.13864	8.43822	7.93585	8.76517	8.42583	8.47782	8.61375	8.4589	8.51476	8.33851	8.03776	8.46855	8.02492	8.72454	8.5828	8.64566	8.05041	8.65268	8.52559	8.0601	8.59127	8.77312	8.97036	8.08987
APEX2	11746416_a_at	5.09237	5.35931	5.4863	5.3831	5.40393	5.0713	5.74235	4.81644	4.84047	5.07177	5.35628	5.18509	5.21212	5.03212	5.09278	5.08689	5.50254	5.20138	5.30881	5.10623	5.07177	5.20276	5.21923	4.86815	5.20476	5.09194	5.36697	5.1838	5.24198	5.23118	5.60032	5.09442	4.79496	4.89801	4.65577	4.99902	4.99603	5.26147	5.01273	5.56111
APH1A	11744723_a_at	6.1585	4.23912	5.3519	5.60904	4.97023	5.6664	4.69196	5.77402	5.25003	5.75072	5.56294	5.14643	6.22919	6.00202	5.40061	5.5967	4.91117	5.69129	5.45618	6.11912	4.58171	5.53267	5.97253	5.41328	6.09198	5.75071	6.18924	5.87479	5.65597	5.89815	6.34134	5.89269	5.90638	5.58038	6.04759	6.16017	6.3535	5.75353	5.79153	6.17804
APH1B	11756680_a_at	2.88269	2.8351	3.06011	2.78225	2.347	2.86069	2.55352	2.66796	2.3742	2.75423	2.29953	2.32526	2.56221	2.66102	2.55758	2.61895	2.91227	2.74336	2.58498	2.74	2.60905	2.92247	2.68311	2.20347	2.575	2.74496	3.08093	2.54223	2.4301	2.68563	2.76971	2.61148	3.14319	2.64705	2.6722	2.47765	2.92341	2.82086	2.74595	2.54085
API5	11742050_a_at	4.71009	3.3577	3.4053	2.67092	3.04227	4.78183	3.15707	3.6725	4.08091	4.2271	4.71788	4.05057	5.2814	3.80052	3.28408	4.18712	3.18441	3.7791	3.78283	4.04131	4.96712	4.44288	4.01545	3.41561	4.60641	3.94312	3.06846	4.51991	3.62987	4.15462	3.88104	4.17183	3.9997	3.97708	4.04979	3.9312	4.46888	4.35064	4.54741	3.55988
APIP	11720834_a_at	7.48706	4.96551	5.11229	3.7992	5.3953	6.41929	4.63927	5.14781	5.59427	6.5497	5.65407	5.92679	6.43209	6.05329	5.07028	4.37624	5.14558	5.34344	4.55605	6.33564	6.0793	4.99819	6.09426	5.7869	5.81417	5.57525	5.24271	6.12009	5.40946	5.47755	5.88266	6.29315	5.34318	5.78751	6.25972	5.83769	6.20762	6.15281	6.13006	5.44099
APLN	11724665_at	4.22454	5.5991	4.98507	5.02513	5.4572	4.94278	5.36002	4.74027	5.51326	4.55715	4.7721	4.61742	3.99346	4.95727	4.73814	4.79322	5.40984	4.55689	5.18497	4.73752	3.97231	4.66686	4.74283	4.70988	4.69645	5.01742	4.74956	4.56154	4.70312	4.76534	4.80754	4.81208	4.44325	4.88699	4.21862	4.71797	4.08722	4.67524	4.31373	4.56187
APLNR	11722792_a_at	2.45328	3.42801	2.95435	3.35035	3.22695	2.57448	4.06624	2.25123	3.04546	2.54179	2.6917	2.10239	2.60905	2.7443	3.01032	2.78037	3.29142	2.86664	2.70853	2.60075	2.45439	2.5883	2.83036	2.60317	2.71394	2.65413	2.64567	2.43183	2.54369	2.71572	2.52223	2.89967	2.75268	2.85674	2.41932	2.73253	2.48165	2.57113	2.44675	3.11392
APLP1	11718756_a_at	2.40775	3.23695	3.02347	3.3435	2.99811	2.56196	3.35303	2.70516	3.48581	2.50175	2.7633	2.1912	2.1416	2.97437	2.92288	2.87471	2.77731	2.84189	2.70397	2.66669	2.60524	2.63031	2.81435	2.71609	2.83164	2.98324	2.70585	2.51204	3.00138	2.92341	2.78163	2.82732	2.78501	2.99132	2.53565	2.87327	2.5489	2.45569	2.75195	2.79373
APLP2	11741085_a_at	7.16937	7.97051	8.55676	8.01719	7.42776	6.49638	6.95435	8.85524	7.93939	8.5095	9.04536	8.40034	8.96382	8.3523	8.75286	8.4978	7.78929	8.08599	8.09814	8.38156	9.21308	8.30543	8.70955	8.94875	8.50654	8.46093	8.73584	8.36086	8.62596	8.80215	8.08613	8.35188	9.17185	8.13463	8.86798	8.85929	9.38585	8.92087	8.4577	7.96222
APMAP	11717151_s_at	7.2498	7.31301	7.26694	6.84417	5.79097	6.41384	6.07853	7.74781	7.56201	6.45422	7.53486	6.88387	6.88969	7.08286	7.61939	7.22635	6.18198	7.242	7.43856	7.05003	7.33706	7.1512	7.01131	8.11655	7.28333	7.40918	8.08154	7.26564	7.9154	6.80858	7.02372	7.08172	8.15092	6.51731	8.11585	6.36682	6.91057	7.61349	6.64546	6.90263
APOA1	11758197_s_at	2.59798	3.85444	3.81572	4.04181	3.81572	3.50411	4.54961	3.48235	3.75684	3.05415	3.1284	2.98193	3.12084	3.5478	3.52289	3.30678	3.75009	3.39615	3.58106	3.22988	3.29021	3.33492	3.00347	3.22351	3.08948	3.23781	3.33637	2.92622	3.37215	3.36809	3.45973	2.92054	2.98328	3.36371	2.76447	3.39563	2.95087	3.17498	3.00224	3.27426
APOA2	11718034_a_at	1.71351	1.99748	2.16116	2.02981	2.82425	1.91814	2.10083	2.23526	2.30837	1.99186	2.35002	1.95943	1.73092	1.89879	2.00578	1.8139	1.97654	1.98188	2.00869	2.27256	2.18951	2.18138	1.93636	1.99063	2.01673	2.32791	2.16086	2.24311	1.98144	1.89134	1.93057	1.84413	1.98598	2.05988	2.03843	2.03894	2.00233	2.13122	1.95753	2.01611
APOA4	11758243_s_at	2.47916	2.93197	2.74069	2.96095	3.43038	2.47135	2.82709	2.90688	3.00856	2.80314	2.41102	2.36371	2.31271	2.86182	2.74866	2.92821	3.0862	2.62228	2.93802	2.55896	2.35607	2.73319	2.65824	2.69761	2.37668	2.42033	2.80219	2.43635	2.65414	2.60149	2.67536	2.76973	2.54098	2.68978	2.29253	2.66814	2.61427	2.49922	2.50508	2.79007
APOA5	11756672_a_at	3.47601	4.48276	3.89098	3.90901	3.65764	3.39897	4.14933	3.54027	3.97302	3.87088	3.62133	3.61436	3.77845	3.7195	4.26369	3.80441	3.77411	3.67124	4.09901	3.76698	3.74047	3.87789	3.60466	4.13478	3.52705	3.83399	3.68177	3.75955	3.58512	3.96587	4.04062	3.59202	3.71972	3.74184	4.08341	3.77436	3.8389	3.60943	3.6029	3.92009
APOB	11758033_s_at	1.71621	1.92759	2.07647	1.91228	1.9475	1.97119	2.11482	2.11054	1.92023	1.80814	1.83769	2.07462	2.02683	1.71032	2.02025	1.69352	1.90979	2.01244	1.91935	1.86865	2.10852	1.9193	2.18899	1.76597	1.86645	1.6825	2.06651	1.85969	1.89605	1.94048	1.78239	1.86668	2.02413	1.91759	1.94043	2.03239	1.81156	1.78908	1.91228	1.88198
APOBEC1	11730904_at	3.60529	4.49123	4.16418	4.88669	4.71256	4.00481	4.70301	3.89542	3.99615	3.93151	3.78544	3.82821	3.39129	4.15144	4.19375	4.09326	4.26398	4.09084	4.40119	4.18546	4.1401	3.97757	4.03158	4.10052	4.05461	4.11242	4.26864	3.95273	3.87105	4.20078	4.60149	4.06653	4.06944	4.2396	3.88962	3.95669	3.51629	4.12407	3.73539	4.37046
APOBEC2	11748860_a_at	2.74947	4.03689	3.33108	3.6492	4.72703	2.91908	4.10046	2.96398	4.69061	3.013	2.70807	2.86556	2.81684	3.03082	2.91992	2.85296	3.81192	3.03091	3.34131	2.84483	2.81515	2.68999	2.7146	2.66024	2.54056	2.9903	2.43807	2.62057	2.95466	2.72769	2.76132	2.83824	2.63243	2.85929	2.88932	3.17629	2.56466	2.83824	2.42773	3.39553
APOBEC3B	11732902_x_at	4.33856	7.37492	7.85969	3.64393	5.58837	5.60406	3.28131	4.63567	2.60608	7.9711	6.98569	7.96522	8.5397	4.99199	3.39871	3.24092	6.65224	8.31761	2.92521	3.52476	9.92938	3.88293	8.67858	8.63787	8.73017	7.8751	3.12075	3.63174	4.20513	7.95956	4.52029	4.81634	2.80933	3.02748	9.76317	9.4728	5.08584	4.26185	9.81661	8.10257
APOBEC3C	11723956_x_at	6.76582	7.74913	7.50285	7.8609	7.8084	7.51843	7.9148	7.88841	8.11251	7.33819	7.71575	7.59895	7.54068	7.27296	7.23216	7.27634	7.68585	7.5621	7.67397	7.36413	6.75899	7.61688	7.1366	7.08004	7.53419	7.57831	7.50943	7.39232	7.2203	7.30272	7.56386	7.42623	6.89506	7.13145	6.89899	7.46018	6.8865	7.32188	7.12862	7.85854
APOBEC3D	11740503_x_at	7.50197	7.83456	7.51174	7.78608	7.94585	7.68514	7.73278	7.9528	7.70044	7.66697	7.61779	8.26035	7.68008	7.60557	7.96496	7.88383	7.7564	7.72985	7.93157	7.79455	7.39556	7.80977	7.51349	7.52843	7.9486	7.84259	7.70753	7.9154	7.74538	7.70169	8.0968	7.67592	7.50721	7.64123	7.66931	7.66428	7.91394	7.71081	7.93867	7.93764
APOBEC3F	11761502_at	2.34885	2.94126	2.55856	3.16828	3.00718	2.54101	3.07538	2.53263	2.39917	2.29854	2.62919	2.49761	2.35748	2.41936	2.66564	2.68857	2.73725	2.6242	2.88633	2.38461	2.02816	2.52232	2.36697	2.46593	2.4336	2.48229	2.835	2.464	2.52297	2.5318	2.56519	2.22729	2.52889	2.534	2.50234	2.61924	2.04074	2.35671	2.16139	2.51555
APOBEC3G	11762899_at	5.5849	6.1989	5.84735	5.84412	5.87186	5.51645	6.08812	5.39575	5.49827	5.52953	5.38895	5.51919	5.13928	5.84343	5.83181	5.6287	5.83525	5.76528	5.56679	5.33429	5.03382	5.67873	5.42373	5.60494	5.46435	5.71821	5.61325	5.49869	5.55298	5.57454	5.58952	5.33054	5.50386	5.56439	5.71685	5.77586	5.27308	5.54954	5.22813	5.82751
APOBEC3H	11754148_a_at	5.40769	6.13996	5.9507	6.21834	6.22767	5.144	5.88685	5.95583	5.95486	5.67349	5.49901	5.91975	5.65983	5.84635	5.79518	5.55895	6.13866	5.7694	5.80535	5.73001	5.78932	5.75677	5.40813	5.65791	6.51859	5.82928	5.93091	5.96234	5.71167	5.66819	5.99424	5.95128	5.57509	5.50855	5.78594	5.7203	5.26327	6.29826	5.48156	5.85306
APOBEC4	11740104_at	3.55838	4.45247	4.3252	4.38643	4.31875	4.00926	4.29823	3.61569	4.04053	3.63436	3.75833	3.87596	3.43512	4.02872	4.17313	4.07897	4.25609	4.25507	4.16746	3.9414	3.96688	4.23761	3.99521	4.0254	4.03132	4.06094	3.89533	4.02573	4.15324	4.03724	4.05419	4.04634	4.02908	3.85412	3.80465	3.8252	3.74522	3.99567	3.73939	4.2234
APOBR	11752056_a_at	6.45826	7.52672	7.56788	7.78144	7.12828	6.56022	7.02631	8.30885	7.21949	6.85793	8.03187	7.71111	7.46379	7.28108	8.37512	7.90203	7.16975	7.62048	7.9685	7.42762	8.31787	7.45966	7.88169	8.07896	7.40017	7.60396	8.18565	7.57756	7.97353	7.64027	7.73901	7.23692	8.20765	7.41881	8.26703	7.63211	8.02283	7.30268	7.27844	7.51248
APOC1	11763647_at	2.65145	3.61965	3.47337	3.94992	4.13141	3.04546	3.94781	2.92997	3.38592	3.33288	3.01637	2.63462	2.94546	3.31237	3.2308	3.60609	3.48102	3.45357	3.5869	3.18665	3.1339	3.03488	3.53908	3.4027	3.23156	3.80663	3.4594	3.04084	3.0602	3.40853	3.35191	3.33263	3.32839	3.1407	2.82723	3.31777	2.79089	3.31207	3.1635	3.372
APOC2	11745393_x_at	3.41167	5.33098	5.06178	5.8563	4.99153	4.65493	5.53361	5.07155	5.01917	4.27681	5.0082	4.58564	4.34313	4.93901	4.74652	4.96021	5.77773	4.72318	5.08042	4.73925	4.67574	4.94421	4.84915	4.5041	4.89251	4.82964	4.96322	4.59221	4.94319	4.86836	5.03266	4.5404	4.45519	5.02479	4.65325	4.72318	4.08113	4.55481	4.60583	5.55296
APOC3	11723791_s_at	3.84081	5.65811	5.21639	5.62059	5.77072	4.60173	5.60325	4.88336	5.20092	4.54505	4.65598	4.33057	4.09506	5.0031	5.02276	4.79137	4.98957	4.88614	5.00898	4.69281	4.1406	4.65953	4.97781	4.64286	4.56584	4.86664	4.62368	4.48658	4.75542	4.65502	5.31017	4.57865	4.63119	4.77848	4.65502	4.6561	4.34135	4.47239	4.31546	5.20255
APOD	11761214_at	3.11902	3.71232	3.58463	3.69252	3.4573	3.50198	3.70134	3.55343	3.45356	3.21545	3.46974	3.42982	2.4004	3.49949	3.62149	3.3562	3.69753	3.5625	3.55672	3.57224	3.27512	3.43153	3.26103	3.24834	3.43159	3.83694	3.1447	3.56278	3.38453	3.54458	3.48007	3.52412	3.53851	3.74825	3.21343	3.37713	3.37172	3.40405	2.98118	3.42536
APOE	11744068_x_at	4.31323	5.23502	5.36538	5.6005	5.48861	4.85683	5.44873	4.42141	4.97173	4.50314	4.70363	4.25366	4.1907	4.99974	4.73694	4.9019	5.40571	4.73827	4.77125	4.56303	3.91376	4.74449	4.5861	4.69211	4.41797	4.76624	4.89208	4.31044	4.55505	4.59963	4.70174	4.62007	4.58947	4.37439	4.32828	4.61098	4.12411	4.56988	4.26284	5.37421
APOF	11736950_at	2.20077	2.40183	2.52735	2.44419	2.87773	2.3108	2.98861	2.20416	2.75736	2.13274	2.12944	1.88655	2.2277	2.39831	2.2709	2.2257	2.31473	2.41013	2.42805	2.3601	2.33244	2.33869	2.13199	2.09716	2.24988	2.3142	2.23011	2.26579	2.38506	2.30009	2.16084	2.45491	2.22696	2.37357	2.07569	2.20186	2.34594	2.34795	2.12858	2.5686
APOH	11743654_a_at	2.99175	3.78182	3.44584	3.34781	4.13435	3.1565	3.13444	2.99127	3.27775	3.06167	2.85526	3.04475	3.06201	3.13872	3.283	3.53283	3.51069	3.27418	3.43429	3.09859	2.77061	3.10874	3.1613	3.19805	3.0696	3.39565	3.34326	3.0318	3.0023	3.16024	3.14415	3.27187	2.92576	3.34822	3.07472	3.00269	2.74158	3.1055	2.92123	3.17966
APOL1	11735997_x_at	3.86854	4.59016	4.66501	5.12193	4.91195	4.55609	5.12574	4.57327	4.10693	4.51097	4.2697	3.67808	3.59865	4.47764	4.69999	4.19524	4.5772	4.09451	4.60022	4.08487	4.0157	4.32316	4.45743	4.19479	4.27057	4.20017	4.24217	4.29832	4.3232	4.14985	4.07297	4.55135	3.76023	4.34045	3.96696	4.91496	4.56663	4.12768	4.00931	4.57168
APOL2	11751299_a_at	5.83538	5.13686	5.95761	6.71483	5.48788	4.9827	5.8326	7.3247	5.91437	6.17837	6.97906	6.10754	6.17363	6.12945	6.39484	6.03897	5.3373	6.27101	5.66329	5.69964	5.88974	5.92311	6.86948	6.21713	6.69042	6.48156	5.92648	6.19895	6.6909	5.77928	5.94587	6.14027	6.10952	6.10744	6.33665	6.6348	7.31534	5.88866	5.8998	6.14552
APOL3	11723974_a_at	7.64871	6.50153	6.59811	7.0055	6.38363	7.15614	7.23683	8.03498	7.3591	7.6021	8.47044	7.94894	8.13866	7.48046	7.2713	7.27685	7.01754	7.13403	6.9038	7.41528	7.66501	7.39681	7.92227	7.25758	8.73544	7.11778	6.93144	7.29573	7.3415	7.17599	7.88949	7.82604	6.39543	7.1884	7.25178	7.54512	8.15704	7.69834	7.76032	7.37948
APOL4	11751781_a_at	3.45892	2.5434	2.43008	2.91766	2.46474	2.27986	2.77373	2.29805	2.45478	2.76081	2.66959	2.1296	2.38318	2.42736	2.45695	2.47711	2.76997	2.38968	2.53305	2.40289	2.13577	2.47065	2.30566	2.48049	2.31543	2.22144	2.39566	2.33193	2.77271	2.31957	2.49295	2.54179	2.19372	2.4637	2.46608	2.62441	2.89392	2.31098	2.34658	2.48909
APOL5	11734516_at	3.14321	4.02131	4.24396	4.33313	4.20434	3.47552	4.39184	3.91515	4.54448	3.48099	2.96562	3.0969	3.21897	3.47552	3.96677	3.48066	4.63211	3.81678	3.86772	3.56403	3.69032	3.71183	3.4849	3.59976	3.70229	3.7845	3.82359	3.66962	3.67833	3.36949	3.80204	3.47923	3.57664	3.87908	3.46891	3.39331	3.69283	3.52518	3.11959	3.90473
APOL6	11732243_at	3.19108	4.12048	3.79866	4.8009	3.80003	3.6181	4.24029	4.82504	4.10309	4.11125	4.34572	3.85441	3.80252	4.16115	4.05962	3.76079	4.18801	4.15425	4.16611	3.60257	3.26735	3.88924	4.37265	3.45106	4.48037	3.76195	4.02627	4.3749	4.03869	3.70724	4.11655	4.34773	3.84588	4.08158	3.80421	4.32428	5.21784	3.8676	3.68811	4.79896
APOLD1	11737822_a_at	2.74899	3.10084	3.43813	3.18399	3.11008	3.45654	3.11812	2.79372	2.98887	3.00469	2.58153	2.56423	2.86041	2.9645	3.04546	2.88826	3.46866	2.9229	3.31141	3.17333	2.73467	3.18743	2.83789	3.01682	2.84684	3.19606	3.17333	3.14699	2.98035	2.97189	2.92523	2.91007	3.07448	3.4001	2.8844	3.12205	2.57765	2.94144	2.93034	3.04666
APOM	11721166_a_at	4.49361	5.41411	5.5999	5.31871	5.75118	5.46846	6.42581	4.72586	5.15177	5.27261	4.83367	5.17834	4.96349	5.37702	5.36525	5.27104	5.78149	5.23118	5.43164	5.3029	4.56061	5.02667	5.10938	5.28341	5.27891	4.89405	5.39125	4.95995	5.11759	5.18958	5.13431	5.10484	4.95504	5.01149	4.58869	4.97101	4.95484	5.01726	4.94415	5.3985
APOO	11726662_a_at	7.09111	6.5284	6.4255	6.23953	6.52402	7.23483	6.64988	5.61816	6.7699	5.86839	5.97994	6.05948	5.82571	5.76211	5.75683	5.69768	6.20962	5.81397	5.96257	6.12546	5.71914	5.90157	5.907	5.9305	6.02184	6.34614	5.99907	5.74372	5.71388	5.80109	6.19422	6.18017	5.45549	6.01083	5.74764	5.88253	5.5566	5.91038	5.72645	6.20091
APOOL	11731149_a_at	3.4012	3.03688	3.30108	3.31239	2.91518	2.93831	3.02165	2.57272	2.92867	2.64006	3.07316	2.74684	2.76158	2.85526	3.04546	2.72922	3.27063	2.76757	3.19654	2.7194	2.96949	2.62896	2.46137	2.63034	3.01183	2.97655	2.92353	2.7864	2.45073	2.94512	3.16017	3.02161	2.93926	3.24899	2.86043	3.01117	3.24023	3.0672	2.9244	3.08585
APOPT1	11739500_a_at	6.58668	6.31482	6.68788	6.39341	6.43077	6.08506	6.99812	5.60502	6.49824	6.61198	5.99325	5.89255	6.16229	6.08506	5.72693	5.70621	5.89439	5.85282	6.00357	6.00595	5.73084	5.58606	6.04973	5.94358	6.01281	5.95795	6.13942	6.13472	5.88454	6.06154	5.92225	6.21071	5.91472	6.08574	5.96497	5.88783	5.79832	6.16439	6.12139	5.7355
APP	11762803_at	2.68359	3.61975	3.71856	3.81661	3.65698	3.42891	3.60358	3.45528	3.51783	2.95509	3.20962	3.09942	2.9504	3.45356	3.44792	3.33406	3.80447	3.31924	3.60816	3.36467	3.0402	3.37568	2.98112	3.30432	3.36391	3.43249	3.53492	3.06439	3.45051	3.28748	3.34694	3.46491	3.31062	3.42934	3.08364	3.53719	2.44209	3.34984	3.04534	3.56544
APPBP2	11758116_s_at	6.24818	4.59494	4.12965	4.00046	4.36909	5.25941	3.75557	5.69622	5.27179	5.59066	5.73971	5.90031	6.17246	5.27729	5.23835	5.45656	4.54929	5.56946	4.91598	5.66384	6.22188	5.6539	5.32859	5.65058	5.44047	5.27247	5.34179	5.66868	5.46903	5.42217	5.00615	5.74714	5.8162	5.58038	5.76093	5.56574	6.04964	5.5212	6.14928	4.68975
APPL1	11722731_a_at	3.39092	2.17556	2.34166	2.20851	2.13484	3.22554	2.40358	2.35792	2.45859	2.54179	2.93956	2.64892	2.77761	2.34091	2.57116	2.47325	2.21283	2.30484	2.62387	2.55386	3.01991	2.09939	2.83036	2.55696	2.48002	2.31506	2.53047	2.53357	2.41006	2.46739	2.95965	2.45748	2.67375	2.24692	2.91791	2.4095	2.90391	2.61396	2.95025	2.21203
APPL2	11748245_a_at	3.90787	4.82313	4.73106	4.13317	4.61102	4.63309	5.00127	4.67837	4.34909	4.51383	4.6054	4.33057	4.61313	4.79192	4.74747	4.78917	4.42855	5.02198	4.66856	4.91334	5.29214	4.97456	4.60672	4.62319	4.27733	4.48875	4.91611	4.63683	4.27226	4.20906	4.26324	4.17575	4.70484	4.63819	5.22501	4.4119	4.46631	4.25498	4.56582	4.40364
APRT	11742692_a_at	9.49954	8.00016	8.26572	8.1523	8.477	8.83368	7.80309	8.5083	8.30359	9.03528	8.75256	9.18029	9.34771	8.4374	8.69149	8.75402	8.37564	8.71173	8.43615	9.07107	8.60626	8.75707	9.07048	8.69863	9.05189	8.60498	8.57271	8.8092	8.72588	8.91561	9.13654	8.95843	8.33034	9.10994	8.70135	8.53341	9.04921	8.92086	9.23379	8.69557
APTX	11723972_a_at	4.92459	4.90788	4.36709	4.70616	4.47458	5.39434	4.90931	4.79375	4.62466	5.1471	4.59387	4.92349	4.95225	5.18509	4.91968	4.68977	4.53003	4.72597	4.88943	5.19706	5.18734	4.74797	4.81368	4.95981	4.80258	4.9383	4.65032	5.03112	4.79511	4.75399	4.89222	4.62372	4.83655	4.63614	4.86533	5.06245	5.50855	4.82391	5.11906	4.62234
AQP1	11756045_s_at	3.07847	3.6142	3.868	3.95857	3.68144	3.35391	4.59941	3.29162	3.64935	3.73484	3.00529	2.866	3.12324	3.27274	3.3879	3.71974	3.71551	3.37446	3.75338	3.38494	2.89409	3.54295	3.33136	3.54301	3.25523	3.58291	3.46555	3.41354	3.25279	3.57916	3.32459	3.28502	3.06467	3.55292	2.87079	3.43457	2.82103	3.58598	3.04419	3.56677
AQP10	11734383_a_at	4.21119	5.245	4.97634	6.66902	5.14948	5.32386	5.32888	4.83945	4.90023	5.75177	4.30525	4.78464	5.02095	4.93076	5.243	5.77705	5.52038	6.14506	5.92778	4.77331	4.63014	4.86291	4.8	4.95969	4.92929	5.34694	5.81751	4.64461	4.99805	4.6052	5.13017	4.98604	5.45765	5.06479	4.49725	5.07548	4.74292	5.39506	4.19801	5.21626
AQP11	11728147_s_at	2.22889	2.52153	2.43424	2.51728	2.49978	2.24506	2.53083	2.15717	2.2473	2.29681	2.38496	2.57335	2.29827	2.28518	2.30107	2.31727	2.57728	2.3712	2.28287	2.30581	2.14133	2.29261	2.33073	2.45091	2.36509	2.41654	2.42089	2.27226	2.3702	2.43823	2.51765	2.3708	2.16591	2.34902	2.30885	2.30303	2.38483	2.53724	2.22562	2.1454
AQP2	11729928_a_at	3.26777	3.98712	3.85726	4.0221	4.05613	3.60881	4.39944	3.57261	3.7507	3.34828	3.50809	3.47593	3.58751	3.81636	3.60797	3.74682	4.07674	3.94865	3.85726	3.63614	3.58384	3.79595	3.74171	3.64727	3.69247	3.83211	3.5304	3.63576	3.7628	3.69306	3.9198	3.65454	3.63552	3.87676	3.41566	3.65242	3.44274	3.56188	3.54092	3.56497
AQP3	11760931_x_at	5.00309	6.14561	6.13332	6.33665	6.45099	5.89496	6.28852	5.17213	5.9353	5.60032	6.29957	5.42782	5.28742	5.89526	5.52319	5.53671	6.20742	5.71962	5.85463	5.6122	4.85377	5.95428	5.73899	5.55887	5.62373	5.45384	5.56774	5.66608	5.92194	6.01031	5.96785	5.59033	5.62758	5.66165	5.68181	5.74915	5.00997	5.81271	5.37891	5.80508
AQP4	11722620_a_at	1.87115	2.25797	2.15733	2.03933	2.153	1.92029	1.96343	1.90341	1.75945	1.9794	2.01098	2.16608	1.9871	1.89929	2.01219	2.02769	1.95708	2.05389	1.93217	2.07668	1.99241	1.97145	1.852	2.04251	1.83028	2.03365	2.02961	1.96083	1.93282	1.92627	2.04652	1.8532	1.93475	1.99171	1.91981	2.15148	1.78913	2.09137	1.9434	1.84117
AQP5	11721531_a_at	5.46701	7.20237	7.22462	7.77903	7.74796	6.54222	7.48516	6.70837	7.58868	6.18761	6.52395	6.44241	5.78957	6.70506	6.64927	6.37341	7.40677	6.55105	7.2529	6.4346	6.20486	6.61618	6.34801	6.21506	6.46385	6.86474	6.6427	6.33425	6.38777	6.43873	6.801	6.44974	6.15082	6.69757	6.20422	6.59269	5.45204	6.34235	5.86984	6.91154
AQP6	11755488_a_at	2.73908	3.45141	3.55365	3.25648	3.61306	2.89685	3.31754	3.50712	3.21403	3.18112	3.04921	3.29221	3.24734	3.46793	3.75031	3.00522	3.19584	3.01859	3.52791	3.08206	3.28007	3.12222	3.21625	3.17743	3.01851	3.19108	3.20156	3.2906	3.33134	3.13074	3.29145	2.97598	2.93375	3.43899	3.19029	3.37798	2.87054	3.20933	3.1635	3.1891
AQP7	11762936_x_at	3.43497	4.2959	3.96591	3.83874	4.26915	3.70465	4.32599	3.08747	3.69945	3.73988	3.50368	2.94407	3.15395	3.56871	3.62226	3.61204	4.18164	3.62577	3.92926	3.46768	2.94733	3.34901	3.59556	3.63523	3.23344	3.70004	3.64757	3.44303	3.3761	3.70199	3.7858	3.24553	3.7871	3.52302	3.20052	3.51675	3.11902	3.68789	3.0507	3.52751
AQP8	11726764_at	3.37063	4.29098	4.22389	4.35971	4.29819	3.88055	4.44894	3.64385	4.42115	3.90752	4.37265	3.63916	3.64039	4.12292	3.85614	3.92785	4.51642	4.07543	4.28368	3.67286	3.51152	3.79453	4.06785	3.96341	3.83402	4.06719	4.14776	3.7551	3.80669	4.22892	4.18832	3.58446	3.85874	3.96558	3.73222	3.92902	3.55361	3.78063	3.4397	4.19947
AQP9	11725701_a_at	5.1095	7.13147	7.7087	6.76557	5.95935	4.85401	5.32181	7.13796	6.39603	6.36705	7.09924	5.96936	6.3306	7.04911	7.7858	7.33212	6.07264	7.58274	7.51367	7.06661	8.05722	6.97952	7.43813	7.82814	6.83441	7.40756	8.0049	7.41882	8.00697	7.15578	6.60826	6.76878	8.76418	6.68465	8.56707	6.64833	7.86858	6.90252	6.98592	6.6241
AQR	11742845_at	5.7933	4.99274	4.51582	5.32461	4.46104	5.75738	4.6782	5.31074	5.07893	5.56623	5.70375	5.96355	6.18926	5.48078	5.72835	5.63304	4.9797	5.49582	5.38883	5.81561	6.10194	5.79338	5.57877	5.80912	5.87309	5.27483	5.57097	5.63601	5.57736	5.75119	5.73544	5.85745	5.37314	5.76315	5.65027	5.56763	5.99972	5.82044	6.04135	5.22246
AR	11752265_a_at	2.83164	3.23578	3.32102	3.41561	3.31385	2.87105	3.28709	3.06697	2.96927	2.94159	3.10982	3.17833	2.65414	2.96793	3.12883	3.08584	3.17538	3.11323	3.30748	3.01656	2.77575	3.08874	2.99693	2.75501	2.88211	3.08206	3.18387	3.07452	2.91866	3.03811	2.82545	3.26717	3.07164	3.04881	2.88076	2.88057	2.72052	2.96223	2.81867	3.41926
ARAF	11763195_at	3.26574	3.05629	2.91801	3.00862	3.42584	2.83663	2.95024	3.43389	3.13666	3.25036	3.3914	2.93201	3.16434	3.2555	2.89795	3.2398	3.2114	3.3002	3.30102	3.25324	3.50137	3.16627	3.23821	3.21247	3.47589	3.29524	3.3678	3.23201	3.46505	2.89201	3.14066	3.55035	3.20106	3.10044	3.15447	3.2979	3.43439	3.59225	3.13788	3.4817
ARAP1	11719038_a_at	7.51061	7.8558	7.9555	8.03012	7.61963	7.09928	7.22309	8.81727	7.88395	8.10692	8.75222	9.2731	8.83465	8.52208	9.19284	9.05703	8.29534	8.7051	8.7931	8.60999	9.02272	8.62452	8.58952	9.42497	8.53538	8.63816	9.07923	9.39563	8.93949	8.76295	8.58652	8.63227	9.40006	8.34708	9.27914	8.60245	9.34879	8.88168	9.08792	8.59947
ARAP2	11730207_at	6.85418	5.55359	6.02361	5.52387	5.50989	6.14079	5.24173	6.44678	6.41567	6.43162	6.0934	5.97541	6.43304	6.08127	5.81333	5.6133	5.54806	6.1743	5.74872	6.4136	6.5786	6.08689	5.8464	6.22648	6.82589	6.17635	5.8937	6.57055	6.49204	5.70551	6.07165	6.66761	5.99511	5.95423	6.2556	6.57751	6.90292	6.32507	6.5286	5.95612
ARAP3	11728743_a_at	4.21132	4.27383	4.06176	4.69942	4.47164	4.17746	4.91854	4.50649	4.60105	3.91796	4.15874	3.83329	4.24804	3.81573	4.18062	3.8296	4.69146	4.16811	4.61655	3.76698	3.96382	4.11009	4.0513	3.86872	3.96276	4.36292	4.11338	4.29222	4.0897	4.17006	4.02785	3.78381	4.06176	4.47798	4.27105	4.21286	3.64704	4.20569	3.83391	4.04047
ARC	11725809_at	3.29615	3.7827	3.70637	4.0021	4.18365	3.34243	4.04372	3.40528	3.69422	3.46957	3.36019	3.46166	3.32141	3.54301	3.55528	3.49543	3.82231	3.51198	3.8106	3.44406	3.32396	3.34319	3.12703	3.43839	3.62837	3.84157	3.49322	3.6372	3.53944	3.48453	3.43785	3.45555	3.52715	3.26711	3.47115	3.56684	3.50189	3.31665	3.10543	3.64155
ARCN1	11736016_a_at	5.79365	5.33287	5.5968	5.36364	4.88094	5.96776	5.44178	5.96149	5.75819	5.23798	6.20795	5.79487	6.11785	5.73325	5.74301	5.66974	5.63766	5.84171	5.70493	5.67254	5.22779	5.95474	5.64863	5.38024	5.62669	5.65551	5.60029	5.82952	5.39108	5.71853	5.54227	5.53203	5.5963	5.51169	5.65825	5.79903	5.92279	5.71625	5.78549	5.56717
AREG	11715306_s_at	1.65616	1.8743	2.03347	2.01428	1.91755	2.50166	2.00482	1.825	1.69975	1.93241	1.50356	1.6347	1.68318	1.82812	1.83163	1.85824	1.85924	1.5132	1.78981	1.81275	1.81275	1.82009	1.60446	1.79137	1.80388	1.673	1.98633	1.78969	2.03692	1.80741	1.66851	1.5329	1.89403	1.96183	1.66665	1.85252	1.82495	1.85354	1.58599	2.13756
AREL1	11716990_at	4.33179	4.71301	4.84502	4.36881	4.1071	4.09682	3.44877	4.92497	4.34007	3.99605	5.21124	4.21109	4.34619	4.98402	4.82655	4.94918	4.35653	4.82864	4.81943	4.78389	5.03352	4.64741	4.76519	4.75482	4.48113	4.72272	4.62755	4.82388	4.84101	4.59116	4.70673	4.63681	5.11564	4.68793	4.92124	4.63933	4.95758	4.78302	4.53775	3.92288
ARF1	11719759_s_at	10.9824	10.9014	10.612	10.8293	10.8643	10.6872	11.1397	10.8122	11.1616	10.7634	10.9214	10.5742	10.618	10.564	10.8758	10.6219	10.3721	10.7751	10.6316	10.6348	10.7019	10.7956	10.8091	10.8759	10.8122	10.6576	10.8122	10.8231	10.9125	10.7454	10.7625	10.4803	10.8458	10.4497	10.9763	10.6276	11.0289	10.734	10.767	10.3053
ARF3	11716032_s_at	4.78393	5.54682	5.47995	5.7586	5.79447	4.8856	5.98489	5.45924	5.56903	5.42717	5.28719	4.87244	5.14146	5.08061	5.2461	5.09767	5.61874	5.18716	5.32338	5.12903	5.13294	5.15029	5.18436	5.16393	5.00141	5.17054	5.27022	5.06837	5.23562	5.10448	5.12491	5.01088	5.14061	5.23295	4.74706	5.31529	4.82265	5.26147	4.83291	5.16923
ARF4	11715428_x_at	8.91475	8.79209	9.52662	8.65413	8.60036	9.16876	9.2646	8.60455	9.00644	8.88481	9.17068	8.53515	8.82507	8.65365	8.40605	8.17491	8.06445	8.53625	8.48752	8.66559	8.93933	8.67588	8.58529	8.55433	8.64762	8.48967	8.1759	8.45314	8.76236	8.59869	7.9466	8.65517	8.76117	8.32658	8.60981	8.68473	9.06734	8.84363	8.61451	8.0947
ARF5	11744871_a_at	8.13453	6.95512	7.31889	6.93038	7.21142	7.02839	7.16235	7.83188	7.48577	7.96783	7.91584	8.15591	8.34927	7.60368	7.72063	7.65054	6.97655	7.66014	7.38606	7.8049	7.08462	7.29319	7.93528	7.92563	8.13453	7.4604	7.99062	7.95845	7.99433	7.93088	7.6654	7.46737	7.89464	7.22287	8.1411	7.57024	8.52788	7.55874	8.00016	7.46476
ARF6	11758273_s_at	9.80469	8.02152	8.28435	7.77229	8.40486	8.68178	7.81001	9.4703	9.13218	9.41478	9.38198	9.51926	10.0739	9.13267	8.81262	8.90888	8.48482	9.13245	8.62037	9.3224	9.68842	9.08976	8.96289	9.24635	9.38826	9.16427	8.66888	9.40206	9.11208	9.14565	9.37322	9.42817	8.85002	9.11939	9.23736	9.30938	9.6932	9.47899	9.42141	8.58146
ARFGAP1	11751152_x_at	3.18956	4.26626	3.90858	3.95429	4.10692	3.78606	4.65746	3.88389	4.70066	3.41909	4.06693	3.40625	3.9213	3.61542	3.91903	3.57958	4.27082	3.60585	3.82492	3.81264	3.28539	3.8135	3.78238	3.52695	3.87229	4.03435	3.79852	3.57327	4.03156	3.81454	3.69553	3.31217	3.73255	3.6443	3.92402	3.49889	3.44919	3.27744	3.7666	3.86646
ARFGAP2	11761097_at	3.19341	4.01714	3.95385	4.15196	3.70588	3.57964	3.88597	3.48643	3.9177	3.29574	3.64803	3.366	3.25557	3.88537	3.52386	3.5607	4.23652	3.55922	4.21664	3.54479	3.38028	3.52231	3.56971	3.52033	3.4602	3.80351	3.70185	3.40136	3.55829	3.5655	3.68049	3.39014	3.39506	3.6837	3.41938	3.44083	3.23429	3.58463	3.49179	3.63632
ARFGAP3	11750980_a_at	6.86978	6.07593	5.80911	6.04275	5.82023	6.01107	5.29407	6.24308	5.97354	6.01398	6.53877	6.06204	6.06382	6.17161	6.32859	6.10774	5.83167	6.50375	6.05046	6.3409	6.41471	6.18865	6.12247	6.55119	6.27509	6.04877	6.43147	6.2457	6.37334	6.11693	5.96652	6.31573	6.5962	5.93353	6.54155	6.10139	6.52643	6.13952	6.26753	5.68492
ARFGEF1	11720576_a_at	7.98767	7.03244	6.84562	6.71119	6.55915	7.15764	6.34273	7.66107	7.13463	7.61175	7.62763	7.49695	8.27354	7.43803	7.40524	7.53334	6.80715	7.55934	7.17336	7.51297	8.17017	7.41826	7.32751	7.90765	7.5626	7.53131	7.63759	7.79356	7.58442	7.56608	7.27874	7.6338	7.73019	7.45075	8.04367	7.47559	7.67681	7.54211	7.88815	6.9589
ARFGEF2	11721063_a_at	3.62828	3.81533	3.58115	3.64393	3.26293	3.63309	3.69389	3.87852	3.31484	3.22903	3.99024	3.43078	3.12416	3.75113	3.43227	3.46658	3.57632	3.59826	3.60032	3.59361	3.35613	3.66077	3.4785	3.76023	3.54436	3.66374	3.51169	3.51564	3.66125	3.49284	3.86828	3.53079	3.51169	3.52473	3.45237	3.77436	3.58214	3.70515	3.45525	4.04756
ARFGEF3	11755839_x_at	2.03114	2.30538	2.10748	2.15136	2.72443	2.61732	2.45827	2.25317	2.38574	2.08746	2.37531	2.13242	2.32617	2.07215	2.23102	1.97223	2.42523	2.12843	2.23956	2.07773	2.78858	2.25893	2.23395	2.04446	2.03183	2.2965	2.21037	2.17508	2.15545	2.07082	2.21347	2.06062	2.15765	2.05642	1.97789	2.18492	2.23102	2.21362	2.15136	2.39914
ARFIP1	11734992_a_at	3.76389	3.15414	3.69968	3.77173	3.75677	3.8229	2.9963	4.41054	3.86212	4.51858	4.61904	3.85428	4.28624	4.39902	4.36161	3.95445	4.07963	4.49822	3.52987	3.9745	5.44897	3.86112	4.42712	4.56026	4.38864	4.08627	4.0872	4.28776	4.72853	4.25775	3.6715	4.23099	5.02553	4.00386	4.52871	4.60807	5.57101	4.22514	4.66301	4.10035
ARFIP2	11739098_x_at	2.66291	3.0601	2.63532	2.84576	3.03842	2.73247	3.02629	2.68446	2.8914	2.64976	2.20474	2.79793	2.3292	2.94524	2.42061	2.55049	3.37565	2.75316	2.92576	2.7141	2.13723	2.44187	2.58822	2.84117	2.57877	2.86136	2.74684	2.67019	2.75757	2.63015	2.8551	2.65153	2.49983	2.99931	2.73429	2.72375	2.58921	2.86136	2.66291	2.57333
ARFRP1	11744387_a_at	3.98874	4.84895	4.71459	4.95601	4.85625	4.40748	5.08641	4.33723	4.41126	4.05611	4.21247	4.38913	3.74137	4.53198	4.37399	4.38368	4.96507	4.62629	4.73021	4.35954	4.23257	4.55003	4.06391	4.18726	4.39599	4.39142	4.63346	4.28541	4.53764	4.34654	4.5623	4.41617	4.26188	4.6139	4.07774	4.44692	3.95525	4.33633	4.18314	4.9715
ARG1	11754669_a_at	7.55398	6.76229	7.61259	6.06039	4.98443	5.76077	7.25387	3.59695	5.8785	5.06448	5.00411	4.30461	2.84119	5.81466	2.68396	3.84807	3.60065	5.09182	6.41397	4.4257	5.7901	3.45602	3.45709	5.99313	3.43771	5.29478	7.36969	4.33245	4.7617	3.38505	3.36702	4.40937	6.69045	3.95431	8.46012	4.20945	3.11902	4.91621	3.24788	3.87889
ARG2	11757776_s_at	6.04158	4.43414	5.9405	3.67667	4.84321	4.89114	6.72822	3.05415	4.60919	4.94091	3.11013	3.01183	2.90773	3.01424	3.17817	3.31438	3.2467	3.29411	3.38667	3.01822	2.95424	3.24317	3.21476	2.8843	3.16989	3.77142	2.77869	3.25176	3.28249	3.25425	2.75775	3.07316	3.26366	3.2715	2.73693	3.26173	2.83442	3.33123	2.60204	3.39376
ARGFX	11741855_at	2.33047	3.05075	2.9707	2.67337	2.94542	2.51397	2.99162	2.46951	2.99451	2.51186	2.71579	2.86556	2.71579	2.64227	2.66387	2.60154	2.82423	2.55773	3.05891	2.78214	2.5077	2.59999	2.44563	2.59415	2.54469	3.0799	2.68129	2.52994	2.52955	2.72659	2.7242	2.55444	2.83954	2.6651	2.22064	2.53958	2.39228	2.66816	2.38358	2.48909
ARGLU1	11761385_a_at	4.70589	3.0697	3.90029	3.58671	3.33875	4.1865	3.32014	3.90437	4.08101	4.11247	4.44233	3.96046	4.87059	3.81236	3.59143	3.70899	3.80464	4.38332	3.90822	4.6183	4.1872	3.6281	3.99509	3.52833	4.10313	4.4079	3.5529	4.82731	3.76157	3.93827	3.19671	4.56531	4.86251	4.11257	4.76469	4.33491	4.82284	4.273	4.65069	3.30833
ARHGAP1	11747362_x_at	4.59479	4.85166	5.26584	5.26114	5.24183	4.46359	5.34888	4.63364	5.1972	5.00615	4.59676	4.4294	4.98486	4.77498	4.85893	4.89179	4.96429	4.912	5.2553	4.6253	3.96606	4.95395	4.81377	4.82943	5.10531	5.0697	5.01211	4.93563	4.87428	4.90111	5.10503	4.93663	4.79706	4.76359	4.65962	5.17717	4.88298	4.99751	4.79475	5.15218
ARHGAP10	11758155_s_at	5.97163	5.49091	5.60307	5.32159	5.692	5.72261	5.55279	5.67479	5.46255	5.5143	4.99972	5.72117	5.44084	5.74549	5.96162	5.75536	5.48179	5.85191	5.65437	5.63247	5.12263	5.69055	5.38277	5.76353	5.67228	5.71992	5.63954	5.94861	5.64733	5.70765	5.60946	5.66091	5.57216	5.70277	5.25183	5.4583	5.40545	5.97272	5.55029	5.75645
ARHGAP11A	11733663_a_at	3.00786	2.17477	2.44386	2.22812	2.52184	3.38081	2.71445	2.25123	2.28755	2.3747	2.64231	2.89949	2.4614	2.20187	2.21541	2.39848	2.05155	2.27162	2.23393	2.30387	2.68847	2.37616	2.14525	1.84882	2.65189	2.14681	2.42469	2.45336	2.31241	2.14022	2.55591	2.66477	2.60905	2.40717	2.80081	2.48318	2.79455	2.67361	2.27538	2.26998
ARHGAP12	11730913_a_at	4.80528	3.02003	2.84626	2.76138	3.06011	3.23501	2.58787	3.73096	3.50041	4.08362	3.82855	3.81794	4.52284	3.58351	2.73269	3.23288	2.98757	3.5443	3.35276	4.02924	4.17327	3.86413	3.45068	3.90449	4.04092	3.90164	3.50114	4.2001	3.24729	3.47581	3.18519	3.9625	3.9453	3.64953	3.99807	3.31587	4.15373	4.01441	4.24113	2.8004
ARHGAP15	11749445_a_at	9.12931	7.86059	8.03848	7.56506	7.24166	7.925	7.29227	8.83642	8.35825	8.41777	9.03265	8.802	9.15836	8.48874	8.47287	8.47719	7.76494	8.67232	8.17413	8.51892	8.92542	8.35517	8.3996	8.88969	8.28815	8.4614	8.64511	9.0161	8.67739	8.57476	7.98754	8.42582	8.76064	8.36444	8.99923	8.23901	8.89815	8.12617	9.0824	8.14921
ARHGAP17	11761669_at	2.24881	2.66334	3.02356	2.4508	2.85745	2.4677	3.15891	2.59246	2.87139	2.55605	2.4567	2.60027	2.68079	2.52007	2.45486	2.43731	2.47892	2.85745	2.52046	2.6307	2.52884	2.58415	2.36156	2.65975	2.45744	2.86136	2.58864	2.45451	2.67982	2.60626	2.47539	2.52751	2.43291	2.56659	2.25272	2.55235	2.61354	2.61278	2.36972	2.32727
ARHGAP18	11736111_a_at	3.86552	3.447	3.41778	3.96358	3.43473	3.65589	3.7633	3.73096	3.99174	4.23632	3.62216	3.63272	3.86069	3.94263	4.02692	3.49745	3.89538	4.34499	4.25013	3.80519	4.23179	4.18099	3.97612	3.88491	3.95397	3.9011	3.67305	3.88675	3.76764	3.70656	3.78212	4.1674	4.16005	3.87889	4.51214	4.16244	4.54749	4.55933	3.69724	4.14853
ARHGAP19	11719348_a_at	4.00998	4.44692	3.89461	4.23248	4.32593	4.14937	4.38243	4.30906	4.58487	4.00257	3.748	4.38171	3.97857	4.20033	4.01599	4.16296	4.50417	4.03509	4.45434	4.09278	3.93359	3.916	4.0337	4.2182	4.07674	4.28909	4.21481	4.10882	4.0601	4.01561	4.16115	4.10295	4.00563	4.08849	3.94956	3.99701	4.04965	3.82337	3.80791	4.00257
ARHGAP20	11726905_a_at	1.72035	1.94959	1.99969	1.84129	1.92053	1.99033	1.95112	2.16543	1.99723	1.79086	2.01545	1.79048	1.92942	2.0219	1.81849	1.72636	1.99169	1.83763	1.90719	1.85615	1.63359	1.92677	1.98978	1.82916	1.92519	2.05255	1.96003	1.68509	1.8952	1.87574	1.89301	1.83763	1.93278	1.86441	1.69681	1.65728	1.76312	1.76172	1.85027	2.16454
ARHGAP21	11718745_s_at	2.3133	2.19989	2.28307	2.17223	2.03452	2.44993	2.00368	2.00163	1.84333	2.05698	2.04207	1.94516	1.98963	2.1124	2.04615	2.07118	2.14628	1.95814	2.06211	1.79456	1.96126	2.1191	1.81699	2.04535	2.08802	2.06525	2.06121	1.92655	1.98949	1.96728	2.03749	1.97538	1.76953	2.01755	2.03615	1.9976	1.71856	1.87878	1.96314	2.29013
ARHGAP22	11715167_at	3.47331	4.18053	3.61391	4.2445	3.83085	3.42666	4.28105	3.38216	4.20554	3.75432	3.48707	3.78884	3.41908	4.12355	3.93237	3.48689	4.2037	3.54293	4.26821	3.83552	3.8709	3.85892	4.08291	3.73465	3.8424	3.79155	3.99453	3.64802	3.7541	3.98799	4.10698	3.8774	3.91305	4.14014	3.41697	4.01309	3.62224	3.80054	3.45137	3.72067
ARHGAP23	11722306_at	3.93689	4.70272	4.71756	4.64976	5.1994	4.4046	5.08278	4.40491	4.16387	4.17315	3.80292	4.20497	3.72949	4.46226	4.46144	4.59687	4.69219	4.60697	4.74387	4.44542	4.05841	4.27204	4.21305	4.54245	4.34783	4.22633	4.59135	4.39122	4.1487	4.49498	4.5286	4.27332	4.08909	4.40267	4.21348	4.55393	3.96243	4.12768	4.10513	4.45841
ARHGAP24	11748527_a_at	3.50485	3.60349	3.50951	3.73609	4.03617	2.97266	3.96279	3.58351	4.04211	3.41441	2.98766	3.15486	3.18686	3.3915	3.48012	3.25907	3.46855	3.17925	3.81099	3.39877	3.45664	3.41127	3.59556	3.50785	3.26026	3.62955	3.63423	3.42674	3.36369	3.24477	3.23761	3.2279	3.71414	3.11736	3.85089	3.31253	3.16252	3.2898	3.02402	3.3811
ARHGAP25	11760973_at	4.8482	6.14249	5.66248	6.03208	5.53102	5.52213	5.97797	5.30742	5.53244	5.25322	5.00228	5.19527	4.9888	5.49364	5.53724	5.54339	5.97518	5.62954	5.76905	5.3558	5.09223	5.53256	5.50745	5.58941	5.4379	5.39609	5.32887	5.37505	5.40559	5.42736	5.69828	5.38895	5.34689	5.4513	5.45615	5.35938	4.78642	5.26687	5.21216	5.74775
ARHGAP26	11743506_a_at	5.76385	6.08098	6.18566	5.38895	5.36798	4.1877	3.56379	6.65642	5.48615	6.05018	7.10285	6.38615	6.42715	6.48984	6.9915	6.64263	5.2225	6.53802	6.48668	6.49524	7.82077	6.62491	6.96413	7.28399	6.49338	6.43898	7.53049	6.64214	6.88813	6.92596	6.44214	6.30455	7.52625	6.09061	7.92688	6.72804	7.57342	7.01246	6.69724	5.47445
ARHGAP27	11760997_at	2.95478	3.71014	3.58463	3.69445	3.76128	3.28285	4.07526	3.39162	3.78208	2.96913	3.11107	3.06962	2.49684	3.40941	3.47819	3.13707	3.89673	3.61402	3.93679	3.40595	3.37473	3.18083	3.34397	3.1442	3.28761	3.51052	3.70124	3.12366	3.35795	3.48424	3.06284	3.39315	3.39454	3.53567	3.39454	3.50311	2.92341	3.36159	3.19915	3.98025
ARHGAP28	11723981_s_at	1.90436	2.13211	1.96659	2.31205	2.12588	1.92673	2.09846	1.88798	2.38281	1.91799	1.98749	2.16545	2.14611	1.98659	2.01456	2.15115	2.31205	2.10035	2.62752	1.83087	1.9907	2.21476	2.0188	2.13258	2.18847	2.1407	2.20684	2.16514	2.32398	2.20212	1.96456	1.86406	2.16751	2.00455	2.14045	2.06545	1.94325	1.99964	2.03859	2.15099
ARHGAP29	11723814_s_at	2.15651	2.36793	2.2032	1.93257	2.13484	2.80741	2.18976	2.06495	2.16353	2.01685	2.15765	1.99821	2.41878	2.06808	2.22349	1.90166	2.05334	2.0897	2.05047	2.15885	2.44901	1.91748	2.11619	2.04363	2.40876	2.06878	2.19933	2.15763	2.28219	2.16327	2.27863	1.86501	2.37947	2.14878	2.88404	2.93027	2.32671	2.39706	1.89341	2.0351
ARHGAP30	11721728_a_at	8.73475	8.1429	8.36769	8.04636	7.88977	7.82297	7.59537	9.46822	8.17651	8.52948	9.18338	9.42691	9.30212	8.64132	9.37907	9.32046	8.09456	8.94155	8.59998	8.76245	9.58255	9.00373	9.096	9.37026	9.17317	8.81861	9.09207	9.19627	9.22656	9.08943	9.14342	8.89957	9.13984	8.78581	9.38602	8.97379	9.81207	8.96432	9.41362	8.5502
ARHGAP31	11733251_at	2.22603	3.35628	2.81491	3.28821	3.12131	2.49899	3.06841	3.29342	2.63254	2.63408	2.97863	2.75247	2.84051	2.76028	2.63619	2.81717	2.8462	2.83339	3.01539	2.79673	2.55537	2.4295	2.73857	2.79319	2.58791	2.70285	2.73192	2.57374	2.64178	2.79078	2.91953	2.69646	2.83934	2.89967	2.58677	2.87802	2.36149	2.72086	2.58791	2.6688
ARHGAP32	11726653_a_at	1.75247	2.07326	2.45074	1.97124	2.34011	4.10909	2.15351	2.13548	2.47234	2.14396	2.39043	2.32775	2.23604	1.90294	2.04353	2.09844	2.0688	2.40698	2.00451	2.29338	2.27155	2.03333	2.3322	2.3322	2.08778	2.27585	2.22144	2.07566	1.88877	2.31494	2.52038	2.57077	1.83431	2.37799	2.17856	2.3611	2.16945	2.39358	2.37583	2.22644
ARHGAP33	11749628_a_at	2.92361	3.84339	3.72375	4.02792	3.93331	3.39536	3.98892	3.27869	3.75023	3.09277	3.22924	2.81073	2.94393	3.19258	3.16248	3.27168	4.00922	3.39332	3.79211	3.2367	3.1714	3.14295	3.04966	2.99974	3.24696	3.40015	3.40195	3.04917	3.20003	3.21998	3.15359	3.06536	3.38375	3.53029	2.71519	3.24648	2.6773	3.16613	3.05191	3.93713
ARHGAP35	11748374_a_at	2.88788	3.25752	3.19108	2.8729	3.28497	3.13874	2.81666	2.64457	2.81082	2.70954	2.74397	2.63712	2.84285	2.65944	2.94426	2.56346	2.96864	2.6376	2.7979	2.56314	2.86446	3.02806	2.66104	2.8695	2.83164	2.79211	2.76067	2.96166	2.97461	2.86668	2.56743	2.92491	3.11927	2.64519	2.67761	2.85479	2.6687	2.93039	2.85136	3.31145
ARHGAP36	11729428_at	3.68154	4.43757	4.79873	4.61206	4.10954	3.93584	4.44626	3.58122	4.21678	3.95185	3.6007	3.81411	3.30661	3.80196	4.2299	3.96801	4.42929	3.99097	4.43892	3.8512	3.58311	4.05046	3.81198	3.8802	3.75911	4.35475	3.94157	3.84755	3.80387	3.85975	4.03406	3.88419	3.93951	4.29591	3.70684	4.06888	3.5485	3.70736	3.63657	4.35217
ARHGAP39	11721594_a_at	2.80615	3.05564	3.05077	3.39584	3.0632	2.62483	3.42613	2.81463	3.70904	2.79247	2.81529	2.86912	2.87963	2.8366	3.01044	3.06912	3.19037	3.08476	2.87085	2.82219	3.56916	2.84611	3.16407	2.88247	3.00084	3.17747	3.08106	2.77434	3.27839	2.87217	2.90001	2.89831	3.16954	2.8175	3.00984	2.97834	2.72106	3.11286	2.76442	3.24641
ARHGAP4	11724110_a_at	7.79565	8.41867	8.07001	8.27241	8.27899	7.82836	8.22205	8.21587	8.36474	7.67665	8.15843	8.42431	8.07567	8.0471	8.13095	8.28245	8.18089	7.92427	8.13252	8.14069	8.03361	8.07118	7.98054	8.13337	8.00321	8.10993	8.23165	7.93062	8.05755	8.12507	8.32452	8.03551	7.84405	7.95338	7.71895	8.04667	7.71448	8.07977	8.12833	7.98558
ARHGAP42	11740170_s_at	2.44484	2.51871	2.23759	2.3284	2.79348	2.64892	2.77064	2.1479	2.36335	2.04435	2.57229	2.42622	1.85336	2.26691	2.09811	2.0643	2.69265	2.13713	1.97635	1.95679	1.66123	2.11564	2.04603	2.12844	2.00866	2.06458	2.09991	2.21959	1.85612	2.12809	2.16116	2.08163	2.11656	2.86187	1.9771	1.95014	2.06294	2.42469	1.96203	2.15327
ARHGAP44	11724641_a_at	2.73927	3.39799	3.39944	3.41561	3.06011	3.7905	3.93987	3.6104	3.7307	2.81717	2.68115	2.7968	2.31492	3.21755	3.11518	2.89216	3.7785	2.93645	2.97366	2.78004	2.52499	2.98869	2.9474	2.84695	2.76443	3.04753	3.2971	2.6733	2.95051	2.94886	2.99295	2.7968	2.83155	3.00579	2.83181	2.9555	2.67045	2.84119	2.64036	3.21061
ARHGAP5	11730288_at	4.39756	2.75846	2.81606	2.85607	3.30754	3.52198	2.37752	2.96093	3.43628	3.86735	3.41284	2.99429	4.05351	2.81012	3.05793	3.24807	3.2208	3.60994	3.08571	3.17154	2.66952	3.38436	3.13986	3.19527	3.20695	3.58801	2.89931	3.55937	2.93783	3.39506	3.05992	3.50349	3.05418	3.24128	2.99241	3.23184	3.3928	2.78492	3.59965	2.83996
ARHGAP6	11738627_a_at	2.55295	3.55183	3.73872	3.66704	2.97473	3.09468	3.97831	2.84664	3.64983	2.79365	2.86919	2.5762	2.55697	2.67012	3.16863	3.22817	3.55468	3.24068	3.3023	2.86862	2.6103	3.10041	2.90731	2.72879	2.85543	2.86136	3.24943	3.03914	2.928	2.92885	2.94338	2.9085	3.44274	3.14272	2.72411	3.06902	2.8092	3.03754	2.64255	3.15747
ARHGAP8	11763470_at	5.33056	5.8466	6.08373	5.88008	6.0543	5.56284	5.93662	5.54695	5.69368	5.57471	5.39187	5.56926	5.49101	5.73974	5.53601	5.75677	5.88579	5.38205	5.79278	5.47211	5.55298	5.71352	5.42556	5.50216	5.52973	5.94721	5.71055	5.44203	5.58015	5.57963	5.74927	5.35931	5.30936	5.50565	5.57738	5.3896	5.18082	5.33386	5.46624	5.86301
ARHGAP9	11761526_x_at	4.87875	5.41392	6.21755	5.7442	5.50658	5.1162	5.48342	6.54836	5.72668	5.63654	6.22672	5.63408	5.75353	5.77689	6.37191	6.05028	5.48133	6.00612	6.21253	5.7231	5.33339	5.85563	6.01153	6.15674	5.95605	6.31871	6.4606	6.09512	6.17051	6.02605	5.70855	5.6846	6.10105	5.66163	6.14294	5.86283	5.45415	5.38225	5.73644	6.04334
ARHGDIA	11747512_s_at	2.67217	3.26399	2.88437	2.98802	3.48697	2.94354	2.95639	2.97838	3.15906	3.64273	3.10192	2.73074	3.74385	2.9938	2.71812	2.85084	3.18665	3.39451	2.85427	2.77659	2.31979	3.06169	2.74636	2.87364	2.88686	3.04036	3.05889	2.75178	3.00479	3.05592	2.99936	3.03882	2.81349	2.91528	2.63033	3.21213	2.55901	2.91235	2.9778	3.38488
ARHGDIB	11715466_at	10.3867	9.18982	9.50073	9.01055	8.54233	9.46368	8.04396	9.47342	9.41164	10.0239	10.4832	10.4806	10.4162	9.70797	10.4021	10.1645	8.95005	10.0465	10.0112	10.2615	11.234	10.1236	10.1455	10.2756	10.2379	10.0365	10.4799	10.3048	10.355	10.2758	9.96973	9.88161	10.363	10.0534	10.3778	9.69431	10.4426	10.1879	10.3889	9.43461
ARHGDIG	11740199_s_at	5.15019	5.53326	5.70571	5.71469	5.60798	5.50587	5.64664	4.77123	5.44532	5.42717	5.15744	5.34667	5.12668	5.44338	5.43312	5.63548	5.76091	5.5036	5.63318	5.39479	4.97006	5.58016	5.51068	5.30342	5.38792	5.38135	5.50192	5.09327	5.5307	5.43255	5.32159	5.28071	5.34114	5.31578	4.95874	5.65357	5.1137	5.12251	5.36099	5.44192
ARHGEF10	11760634_at	2.43501	4.39723	3.00913	3.46198	3.94727	4.44692	3.44364	3.13204	4.39916	2.93994	2.95943	3.07433	5.50715	3.4469	3.47005	3.24092	3.42844	3.04546	4.86415	3.18664	2.61701	3.11767	2.93707	4.19261	3.04508	3.29165	3.42224	3.39226	3.11553	3.11227	3.08758	5.03274	3.0969	5.39325	2.81447	3.99807	5.09166	3.15374	3.46493	3.56897
ARHGEF10L	11752455_a_at	3.78989	4.25209	3.81242	3.79587	3.86705	3.4282	3.87641	3.2802	3.51991	3.57715	4.10649	3.23504	3.44203	3.77399	3.56	3.24827	3.6104	3.42898	4.15168	3.32654	3.58611	3.54287	3.80359	3.56016	3.59405	3.50901	3.81017	3.40087	3.55267	3.55778	3.66034	3.1225	3.48301	3.13048	3.48722	3.6104	3.70486	3.56869	3.3082	3.69107
ARHGEF11	11748608_s_at	4.28227	5.20931	5.31411	5.37645	5.37545	5.09935	5.23031	4.78442	5.07899	4.80192	4.67619	4.62384	4.49347	4.67575	5.04497	5.05119	5.33066	4.92373	5.16593	4.83534	4.59775	5.04664	4.94858	4.71734	4.80192	4.62897	5.18081	4.7632	4.83501	5.05028	4.86151	4.83543	5.07058	5.1019	4.83483	4.97279	4.92531	4.85989	4.88384	5.06638
ARHGEF12	11731442_at	2.24006	5.28476	4.76152	4.26682	5.12887	3.69725	4.90181	2.93165	4.69916	3.30565	2.35303	2.53864	2.5573	2.77566	2.79722	2.73508	3.36261	2.65577	2.58653	2.70766	2.11992	2.87035	2.66607	2.49694	2.62326	2.5266	2.6363	2.30143	2.73794	2.82049	2.75496	2.75418	2.68861	2.63968	2.26498	2.91777	2.54179	2.41714	2.25614	2.65851
ARHGEF15	11750721_a_at	2.43878	3.10128	3.2941	3.02414	3.06011	2.7095	2.82072	2.4644	3.22916	2.68033	2.86162	2.44252	2.4308	2.77317	2.66549	2.80202	3.21672	2.84085	2.80552	2.51394	2.4555	3.0624	2.67881	2.80937	2.74864	2.72348	2.58267	2.48948	2.7315	2.79128	2.60161	2.73976	3.16443	2.68273	2.54179	2.71519	2.46778	2.74684	2.73682	3.07616
ARHGEF16	11751200_a_at	4.64641	5.33208	5.27825	5.80322	5.42883	4.97294	5.62777	4.94945	5.21897	4.83556	4.7106	4.89351	4.71674	4.83543	5.05121	5.16142	5.23869	5.0765	5.0593	4.7987	4.5567	4.87839	5.06339	4.87977	4.65593	5.03964	5.12594	4.50795	4.86547	4.98237	4.88388	4.81963	4.73504	4.94295	4.4572	4.85892	4.67374	4.87581	4.38171	5.23789
ARHGEF17	11720521_at	5.65765	5.9231	5.59011	5.60689	5.48772	4.84266	5.18848	4.73262	5.34769	4.61127	4.68967	4.67578	4.425	5.01413	4.9803	4.81864	5.61672	4.83622	5.14077	4.81658	4.39778	4.62611	4.83417	4.74962	4.72062	4.89874	4.97456	4.69553	4.6702	4.83982	4.83047	4.64804	4.94699	4.83579	4.42833	4.75176	4.38785	4.57242	4.65131	5.33644
ARHGEF18	11720554_a_at	9.31264	8.77022	8.42517	8.29893	9.06322	8.94313	8.40713	9.56141	8.97911	9.00196	9.49044	10.1132	9.91547	9.082	9.71479	9.91662	9.17641	9.69215	9.1906	9.66648	9.72901	9.73969	9.55053	9.53398	9.54193	9.75141	9.25382	9.80788	9.72276	9.82297	9.99094	9.48844	9.37701	9.69309	9.59176	9.2105	10.0527	9.44381	10.2724	9.46276
ARHGEF19	11744237_a_at	6.29204	7.17413	6.97136	7.17347	7.48257	6.87061	7.35067	6.78636	7.16169	7.02925	6.63021	6.68243	6.8033	6.98012	6.93293	6.85263	7.62709	6.98364	7.19961	6.88756	6.4213	6.82011	6.73512	6.86517	6.97206	6.98995	6.86509	6.99993	6.76388	6.92742	7.00243	6.93164	6.78456	6.88627	6.6261	6.83405	6.66396	6.71831	6.70789	6.87692
ARHGEF2	11749038_a_at	3.19383	4.69333	4.5944	4.09082	4.45241	4.11737	4.4164	4.36418	4.40635	3.66554	4.08732	3.5751	4.18623	4.35863	4.22658	4.20643	4.71735	4.09416	4.56088	4.02846	3.41711	3.96202	3.75668	3.80857	3.95225	4.10985	4.28529	4.06008	3.80844	3.9022	3.83802	3.77679	4.04816	4.05454	3.81317	4.11528	3.66169	4.00873	3.77679	4.52574
ARHGEF25	11725006_a_at	2.30185	3.62347	3.21137	3.47678	3.27353	2.94719	3.76522	2.77398	3.3717	2.7512	2.7398	2.46999	2.52834	2.74737	3.0424	3.02541	3.55036	3.04907	3.38402	3.06671	2.89469	2.89967	2.94454	2.86965	2.99925	3.00721	2.60572	2.93742	2.94596	2.91848	2.91925	2.93106	2.66596	2.95911	2.57629	3.09603	2.80951	2.88806	2.63034	2.99175
ARHGEF26	11746981_x_at	2.75722	3.41816	2.67321	2.89971	2.95787	2.83164	3.01132	2.85667	3.26274	2.59894	2.69826	2.92532	3.05688	2.76043	2.84819	2.81374	2.85529	2.57284	2.92595	2.9048	3.05437	2.89396	3.04344	2.78723	2.83164	2.83154	3.21316	2.49408	2.76429	2.57098	2.45915	2.81147	2.70024	2.54587	2.81856	2.61097	2.87674	2.71561	2.73869	2.99427
ARHGEF28	11755922_a_at	1.85206	1.90993	2.08865	2.20226	1.94389	2.07523	2.33582	2.0743	2.02792	1.98926	1.99304	2.12518	1.8724	2.15322	2.23941	2.14154	2.13756	1.9522	2.1449	1.99718	1.88983	2.09042	2.1703	1.97696	2.0463	2.19499	2.2874	2.12013	2.18609	2.0364	2.06491	2.0708	1.96955	2.06355	2.02993	2.0723	1.98993	2.04802	2.07919	2.20804
ARHGEF3	11723491_a_at	5.82237	5.11041	5.45297	5.48692	4.61546	4.81437	5.43127	6.24048	6.10675	6.07822	6.25918	6.0298	6.323	6.01244	5.77581	5.91128	5.21961	6.30049	5.57206	6.20156	6.35716	6.27733	5.98753	5.86355	6.88811	6.19961	5.25843	6.59394	5.8058	5.88452	6.16236	6.29894	5.68604	5.75308	6.20447	6.24687	7.04828	6.44077	6.49409	5.30593
ARHGEF33	11734357_a_at	2.39499	2.60128	2.9612	2.8561	2.54091	2.35453	2.8997	2.40833	2.73845	2.20781	2.2212	2.63822	2.41712	2.49277	2.87386	2.28853	2.59938	2.42664	2.64993	2.39271	2.43652	2.39324	2.17832	2.28747	2.2805	2.62141	2.43422	2.34733	2.34733	2.19793	2.67509	2.43361	2.14823	2.38516	2.2135	2.4875	2.21875	2.60527	2.04799	2.37496
ARHGEF37	11756078_a_at	3.76807	5.49767	6.10582	4.72065	4.60596	4.97514	6.00256	3.67654	4.40972	3.57644	3.71533	3.31794	3.09602	3.98664	3.63186	3.32364	4.77756	3.65467	4.54343	3.35006	2.86113	3.68549	3.44285	3.51893	3.22483	3.74525	3.11214	3.40932	3.43398	3.48424	3.76968	3.67808	3.62692	3.68516	3.67538	3.39165	2.95031	3.59701	3.0663	4.04397
ARHGEF38	11741403_at	1.86659	2.25789	2.06745	2.35579	2.56892	2.0257	2.28114	1.97898	2.35577	1.96285	2.47657	2.43615	2.0145	2.15126	2.11745	2.11417	2.38506	2.11871	2.58497	2.08183	1.96995	1.90306	1.90647	1.99882	2.14196	2.12404	2.02352	2.09952	2.06218	2.06442	2.1088	2.07403	2.47279	1.96741	1.99595	1.89853	2.06382	1.95225	1.97438	2.34442
ARHGEF39	11748452_a_at	2.57095	2.56403	2.91925	2.89034	2.86039	2.60323	3.28613	2.39396	2.3516	2.20514	2.40907	2.46329	2.26453	2.54672	2.53272	2.66503	2.5251	2.53724	2.39604	2.49267	2.61204	2.31569	2.68218	2.33278	2.56268	2.37885	2.62341	2.4261	2.54972	2.4794	2.34641	2.43362	2.45772	2.45436	2.47991	2.62874	2.28229	2.4112	2.43311	2.88367
ARHGEF4	11752534_x_at	2.7233	3.75908	3.30893	3.68347	3.72339	3.32912	4.00172	2.88315	3.32323	3.12451	3.12639	2.94507	3.68167	3.3095	3.18204	3.37034	3.55209	3.35977	3.5954	3.27781	2.993	2.94298	3.52545	3.37552	3.09964	3.38999	3.10455	3.20953	3.49122	3.28561	3.32459	3.53263	3.40459	3.45366	3.16057	3.11981	3.16965	3.53513	3.37348	3.48697
ARHGEF40	11759487_at	3.21455	5.08445	4.94467	4.53016	3.8497	3.56271	4.0443	3.53902	4.112	4.41305	3.98981	4.4377	3.52732	4.3751	4.38877	4.33772	4.38974	4.47928	4.95338	4.40827	4.81459	4.17826	4.08291	5.12708	3.50634	4.57199	6.29155	4.06085	3.87033	4.91085	4.44987	4.09224	5.10515	4.9499	5.57647	4.03176	4.24031	4.37713	3.56611	4.21297
ARHGEF6	11752825_a_at	2.96611	3.17707	2.43837	2.95982	3.34331	3.04546	3.07855	2.89678	3.22327	3.35984	3.14894	2.90772	3.01601	3.03073	3.12374	3.01823	3.24051	3.27804	3.28599	3.18468	3.09388	3.13396	3.1759	2.93736	3.59686	3.13239	3.43081	3.15996	3.1636	3.12932	3.09979	3.6302	3.04795	3.04373	3.08206	3.43431	3.26091	3.18055	3.11643	3.12326
ARHGEF7	11726073_a_at	2.38721	2.18486	2.28307	2.3612	2.02068	2.11749	2.24964	3.08814	2.16872	2.05881	2.24094	2.05912	2.20577	2.36627	2.17508	2.25686	2.09795	2.05319	2.41638	2.24025	2.03428	2.2193	2.4951	2.29284	2.17658	2.30672	2.31015	2.48109	1.94056	2.24692	2.21534	1.90294	2.19466	2.29143	2.10288	2.09461	2.19949	2.03537	2.58459	2.29143
ARHGEF9	11721188_a_at	4.82802	4.15227	3.5461	3.34605	4.20981	5.47251	3.5384	4.68131	4.34017	4.26262	4.63357	5.37	5.09127	4.32555	4.86121	5.05382	4.15662	5.15934	4.24066	5.15727	4.33966	4.97194	4.7205	4.95242	4.7912	4.97996	4.95367	5.1597	4.24291	4.75894	4.9253	4.7607	4.68873	5.07335	4.17269	4.17527	4.85679	4.39169	5.5176	4.11229
ARID1A	11746832_a_at	2.10899	2.54137	2.21278	2.57896	2.17551	2.20369	2.45827	2.55638	2.43619	2.38123	1.96451	2.37736	2.21474	2.31289	2.46988	2.32704	2.3022	2.10047	2.21474	2.2526	2.02323	2.10405	2.50391	2.29552	1.99012	2.12579	2.34285	2.0734	2.08568	2.15196	2.32524	2.19752	2.16239	2.0464	2.21832	2.21103	2.15745	2.28211	2.12944	2.34766
ARID1B	11728877_s_at	6.74443	6.3554	6.70239	6.27386	6.22957	6.80569	6.73608	6.01948	6.28133	6.09066	6.65666	6.59723	6.52307	6.28623	6.77839	6.76833	6.23803	6.43579	6.41863	6.45146	6.92326	6.75073	6.25504	6.39739	6.48726	6.53158	6.47272	6.61174	6.39695	6.49427	6.48233	6.41892	6.28449	6.4833	6.54595	6.11858	6.71872	6.33346	6.82825	6.22027
ARID2	11754757_s_at	5.33905	4.58791	4.26222	3.9729	4.58788	4.84793	3.94781	4.73915	4.38242	5.09581	4.95735	4.97177	5.71474	4.83417	4.87127	5.03679	4.64556	4.9739	4.66929	5.11102	5.19776	5.08936	4.96229	5.16935	5.10561	4.95302	4.95872	5.21098	5.04777	5.24423	4.77365	4.98561	5.22045	4.52253	4.81069	4.58739	5.31048	5.10177	5.4941	4.29364
ARID3A	11730399_at	6.4433	6.04718	6.10069	6.26212	5.5167	5.34254	6.02909	7.48476	5.90115	6.06226	7.05523	6.93979	6.64601	6.53373	7.27546	6.84247	6.27789	5.98859	6.30858	6.33778	7.10034	6.47201	6.5294	6.72445	6.2501	6.57773	6.80336	6.52808	6.89248	6.18998	6.44573	6.08044	7.00008	6.22318	6.74259	6.56215	6.91847	6.78408	6.72479	6.86431
ARID3B	11722475_a_at	5.62826	5.2074	5.1975	5.34268	5.21036	4.37703	5.07686	5.56475	4.52602	4.97403	5.09118	5.73457	4.88131	5.2508	5.75277	5.70082	4.92424	5.36345	5.21438	5.2604	6.1976	5.42037	5.39935	5.57643	5.42516	4.99174	5.63581	5.48794	5.58884	5.15124	5.29346	5.27175	5.77864	5.29612	5.43931	5.19766	5.51925	5.34075	5.47465	5.37261
ARID3C	11742499_at	3.3773	4.24187	3.9455	4.301	4.5454	3.447	4.37898	3.5703	3.27814	3.36381	3.29645	3.18436	3.13478	3.78535	3.82727	3.90749	4.52197	3.74047	3.81914	3.283	3.13733	3.87843	3.52443	3.36869	3.71344	3.73485	3.6802	3.44317	3.66961	3.55046	3.6786	3.49844	3.94794	3.77014	3.63504	3.5304	3.55109	3.45225	3.35642	4.09483
ARID4A	11758442_s_at	6.21758	5.05261	5.33416	4.09196	4.39934	5.30029	4.3386	5.74186	5.25226	5.95305	5.97684	5.59001	6.42802	5.79097	5.79755	5.7005	4.88357	5.81839	5.52041	5.93778	6.91742	5.62401	6.12162	6.49581	5.83855	5.86741	6.29936	6.39215	6.14584	6.19273	5.17814	5.897	6.60752	5.43672	6.63711	5.98857	6.64288	5.88544	6.37133	5.10968
ARID4B	11762376_at	1.82237	1.9198	1.85078	1.85825	1.82039	1.91368	1.58321	1.77362	1.80137	1.92326	1.99781	2.13028	2.28305	2.18746	2.01456	2.14772	1.84349	1.97553	1.86639	1.89733	2.109	1.93805	1.90617	2.09699	2.05881	1.89685	2.13699	2.07823	1.99489	1.91157	2.0529	1.95943	1.94766	1.74447	2.05082	2.097	1.9823	2.01281	1.95565	1.98036
ARID5A	11760851_s_at	4.1186	4.66301	4.84638	5.11639	4.4783	4.15472	4.85846	4.19122	4.42959	4.53675	4.27699	4.32585	3.9379	4.34787	4.407	4.14929	4.57493	4.52903	4.66787	4.25332	4.24292	4.4227	4.18266	4.06702	4.29282	4.38156	4.41512	4.04442	4.39321	4.32241	4.27307	4.32752	4.4208	4.56403	4.21907	4.65598	4.25976	4.13112	4.28223	4.57801
ARID5B	11750222_a_at	5.25959	4.87187	4.79417	4.6684	5.13425	4.83265	4.42475	4.71277	4.62469	5.00585	4.68593	4.99797	4.36208	4.39594	4.71056	4.85484	4.63669	4.86992	4.44103	4.1328	4.19749	4.81332	4.22539	4.35061	4.70618	5.13271	4.55731	5.1441	4.62694	4.57	5.0933	4.61564	4.5914	4.56724	4.70862	4.43734	5.29414	4.20757	4.95061	5.19671
ARIH1	11758786_at	2.60301	2.69385	2.56202	2.71817	2.72536	2.49002	2.92885	2.26348	1.87167	2.78066	2.41992	2.4825	2.23627	2.76568	2.12532	2.63866	2.47267	2.82695	2.61854	2.58478	3.14418	2.62907	2.95184	2.60123	2.48089	2.7008	2.40498	2.80612	2.81091	2.92372	2.54269	2.28475	2.93625	2.57741	2.71599	2.41244	2.46617	2.92601	2.72142	2.86285
ARIH2	11717394_at	6.89276	6.43704	6.63305	6.50667	6.18867	6.58497	6.38598	7.01472	6.29711	6.64668	6.47721	7.04922	6.7541	6.57541	6.84109	6.92149	5.91826	6.61865	6.40551	6.79722	6.91197	6.80943	6.64009	6.81067	7.01263	6.6868	6.82545	7.0735	6.75668	6.73456	6.80166	6.79716	6.50057	6.49099	6.80953	6.56392	6.87859	6.75615	7.0957	6.23592
ARIH2OS	11740715_at	4.83058	4.73845	4.38677	4.0052	4.45329	4.03929	4.21203	3.83317	5.06469	5.02812	3.92469	3.80903	4.17999	4.5177	4.4912	4.53618	4.20145	4.59898	4.73438	4.84013	4.49361	4.22525	4.38606	4.44997	4.53192	4.3073	4.46938	4.68644	4.39032	4.50892	4.47469	4.57612	4.95502	3.94362	4.28074	4.18049	4.43381	4.60018	4.57612	4.48728
ARL1	11747179_x_at	3.25011	2.19701	2.69025	2.38811	2.31184	2.63034	2.11482	2.54712	2.61802	3.19018	2.86756	3.01347	3.70158	2.75016	2.2504	2.28459	2.32773	2.48897	2.59085	2.77151	3.13734	2.30168	2.60145	2.4343	2.62155	2.65194	2.46918	3.04897	2.51659	2.76028	2.64377	2.90982	2.5271	2.72953	2.91025	2.98392	3.09669	3.01592	2.89967	2.66755
ARL10	11762082_at	2.09222	2.76712	2.77569	3.01518	2.08795	2.17943	3.17663	2.64727	2.63462	2.09619	2.36921	2.81258	2.11705	2.4932	2.50043	2.4467	2.38627	2.64245	2.52282	2.3415	2.05727	2.34623	2.34444	2.27173	2.26789	2.46182	2.33435	2.38837	2.03895	2.43893	2.51565	2.39971	2.2597	2.8157	2.16148	2.36544	2.20425	1.96857	2.00829	2.30247
ARL11	11740187_at	3.19667	3.5047	3.16176	3.31048	3.08815	3.24964	3.77331	4.09921	3.57191	3.5304	3.69999	3.22203	3.35829	3.68398	3.58951	3.66374	3.42431	3.48912	3.55672	3.50716	4.05185	3.26516	3.45303	3.65839	3.25505	2.96935	3.76705	3.40404	3.64151	3.47541	3.15375	3.31508	4.52068	3.24691	4.54133	3.71319	4.1139	3.9457	3.48381	3.61372
ARL13A	11748013_a_at	1.79461	2.10693	2.12774	2.19749	2.8553	1.79141	2.53387	2.05152	2.69833	1.77727	1.84996	2.01498	2.15177	1.90227	1.84999	1.81473	2.05308	1.88273	1.97553	1.84072	1.92708	2.0996	1.90841	1.95743	1.88822	1.86579	1.81892	2.07742	1.79535	1.89979	2.02173	1.82851	1.82673	1.96511	1.82628	1.94236	1.85649	1.7777	1.84462	2.01227
ARL13B	11745327_a_at	3.45844	2.60623	2.56966	2.48361	2.90652	3.59303	3.02822	2.91422	2.73642	2.9798	3.04083	2.95757	4.06704	2.77811	2.93607	2.57787	2.77013	2.96535	2.76343	3.08206	3.46399	3.04038	2.95531	2.78723	3.08546	2.72404	2.79808	3.00077	3.18857	2.72235	2.95337	3.08159	2.94182	3.17465	2.8333	2.98131	3.45969	3.10638	3.24788	3.01312
ARL14	11735743_at	1.74698	2.18192	2.26734	2.11778	2.53166	2.05826	2.32556	1.79996	2.03592	2.22342	1.8938	2.36776	2.05881	1.97269	2.01287	2.02528	2.19569	2.33944	2.05881	2.04786	1.82083	2.08268	2.27406	1.90437	1.97057	2.08976	1.91419	2.36573	1.83445	1.95159	2.13532	2.10776	2.03592	2.04885	1.82628	2.04533	2.03501	1.82957	1.93058	2.26505
ARL14EP	11739212_a_at	6.04483	5.24946	5.07519	5.07394	5.72596	6.18857	5.06779	5.45776	5.65672	6.36834	5.71706	5.45353	6.25257	5.57993	4.75947	5.26391	5.64471	5.56731	4.9701	5.48438	5.66313	5.56219	5.68034	5.64099	5.79256	5.52713	5.02227	5.84535	5.14703	5.89726	5.88204	5.97943	5.28715	5.58236	5.8988	5.75194	6.16968	5.86732	5.70037	5.32301
ARL15	11757014_a_at	3.49331	2.68214	2.6473	2.99905	2.79921	2.55981	3.08717	2.87211	2.87018	3.0778	2.84875	2.59214	2.73238	2.84438	3.01279	2.85868	2.7943	3.04546	2.76198	2.47369	2.72245	2.48875	3.1784	2.94172	3.53987	3.00788	2.99732	2.94023	3.03134	3.07044	2.94761	2.80955	3.17829	2.8678	3.32824	3.08143	3.28599	2.97771	2.95818	3.00227
ARL16	11761037_x_at	4.99467	4.47551	4.76061	4.62909	4.97402	4.18727	4.6657	3.89145	4.79233	4.67475	4.38963	3.82447	4.19616	4.51216	4.27488	4.39638	4.3815	4.41702	4.60357	4.48459	4.25156	4.17871	4.27367	4.21091	4.32912	4.39417	4.5017	4.56093	4.23456	4.56484	4.24313	4.57878	4.20347	4.4409	4.44996	4.33061	4.26398	4.28908	4.45892	4.63839
ARL17A	11737105_x_at	4.78556	4.7039	3.82334	3.97449	4.03019	4.85519	4.4905	5.54359	4.54829	4.29641	4.45737	5.36416	5.49101	4.63575	4.6699	5.04345	4.70726	4.85554	4.73514	4.76274	4.19888	4.57701	4.78558	4.98166	5.2357	4.70056	4.19797	5.26295	4.68885	4.8057	4.58987	4.71445	4.30004	4.44819	4.44541	4.75957	4.65363	4.75448	4.68045	4.78018
ARL2	11761096_at	2.54657	2.84951	2.93978	2.79834	2.96274	2.42616	3.8377	2.82702	3.60675	3.15608	2.79653	2.58008	2.40345	2.50368	2.89004	2.60839	2.85873	2.60541	2.9154	2.81218	2.68212	3.20121	2.58989	2.53111	2.57667	2.60541	3.15236	2.91185	2.95716	2.59138	2.73761	2.8407	2.80708	2.84376	2.5333	2.91332	2.77157	3.07316	2.50206	2.96506
ARL2BP	11762986_at	3.13207	3.61979	3.43873	3.59595	3.96283	3.30406	3.29759	2.87809	4.08909	2.89967	3.0699	3.04509	3.0009	3.51067	3.58172	3.30688	3.7545	3.43326	3.6503	3.24393	2.84099	3.33326	3.25051	3.28667	3.11669	3.26906	3.45507	3.25655	3.22882	3.09352	3.35644	3.28622	3.28424	3.1977	3.19943	3.4639	3.10239	3.15731	2.95516	3.31745
ARL3	11716898_at	2.24978	2.8487	2.31608	2.40669	2.24551	2.28996	3.08691	2.44143	2.69368	2.47463	2.48221	2.05168	2.05881	2.20199	2.2361	2.1643	2.6363	2.42862	2.47398	2.32226	2.31659	2.11725	2.18478	2.15473	2.17436	2.32459	2.46471	2.38476	2.28493	2.176	2.14496	2.002	2.36678	2.46899	2.10076	2.36485	2.13956	2.41702	2.21662	2.48892
ARL4A	11733139_a_at	4.01996	6.20491	4.89847	4.29015	5.48897	4.51208	5.88411	2.60798	6.40999	3.8389	2.78315	3.19451	3.04004	2.88392	2.60242	2.81717	3.33757	2.85348	2.988	2.93443	3.53834	2.86676	2.59002	2.72677	2.81734	3.30092	2.71508	3.0444	2.88249	2.95689	3.22667	3.32836	2.92533	2.9582	4.21568	3.04987	3.2081	3.38472	3.03419	3.24092
ARL4C	11763314_s_at	5.19967	5.9422	6.09206	5.89207	6.04865	6.1333	5.8262	6.93588	6.33893	6.83753	6.21622	6.58037	6.51749	6.15842	6.22673	6.44378	6.08526	6.84448	6.75248	6.52276	4.90095	6.71508	5.46557	6.60499	7.36811	6.90135	6.45855	7.0918	6.50615	6.32302	7.02818	6.72586	5.30241	5.7336	6.49878	6.42206	6.96901	6.03692	6.80511	6.76414
ARL4D	11758246_s_at	3.00809	3.29545	3.08392	3.09351	3.01642	3.1696	3.51444	2.65737	3.16191	3.09846	2.91768	3.25074	2.47168	3.29648	2.74429	3.05184	3.32946	3.08051	3.31975	2.7725	3.05449	3.23196	3.07002	2.93618	3.13266	3.13383	3.05911	3.02651	3.10421	3.03104	3.11237	3.07316	2.99745	3.36205	2.71519	3.07415	3.31109	3.07316	3.04275	3.35232
ARL5A	11754120_a_at	6.82349	4.40956	5.28146	4.41547	5.54914	6.14548	4.84681	6.2969	5.82938	6.9349	6.56592	6.31084	6.52452	6.10089	5.03604	5.49638	5.36581	5.77974	5.21474	5.99012	6.04115	5.76186	5.61097	6.07498	6.09739	5.87922	5.34137	6.24606	5.6789	5.85436	5.80362	6.26995	6.12688	5.58038	6.51665	6.36375	6.99126	6.22538	6.17081	5.71906
ARL5B	11729915_at	3.57726	2.17437	2.48782	2.60488	2.13484	2.58135	2.11318	2.59106	2.59745	2.60488	2.92492	2.53991	2.9636	2.24493	2.39451	2.28066	2.04254	3.20892	2.23153	2.31219	2.73062	2.24279	2.61064	2.48947	2.71313	2.3711	2.6788	2.60582	2.49965	2.22547	2.44438	2.89967	3.0969	2.54292	3.18106	2.73271	3.4171	2.93365	2.54469	2.64492
ARL5C	11742587_at	2.21884	3.3959	3.22706	2.68257	3.15075	2.48333	3.08545	2.7582	2.89967	2.72947	2.55527	1.95943	2.2377	2.73849	2.61825	2.62146	2.79503	2.54684	2.75956	2.44069	2.26715	2.66286	2.38702	2.50742	2.43394	2.88087	2.59864	2.4424	2.58657	2.76028	2.61663	2.54179	2.64949	2.35982	2.43793	2.62741	2.24692	2.38717	2.19652	2.9148
ARL6	11747341_a_at	2.25129	1.97466	2.00991	2.01163	1.91267	2.06088	1.80388	2.09681	2.07413	2.25036	1.92565	2.22559	2.17789	2.18516	2.01808	1.7616	2.02841	2.03726	1.8641	2.03978	2.23531	1.96991	2.04152	2.12299	1.98552	1.9775	2.20849	2.13491	1.85294	2.33228	1.93396	1.86893	2.02148	1.74297	1.92555	1.76754	2.33638	1.95026	1.97553	1.87689
ARL6IP1	11752910_a_at	7.9729	8.12546	7.16032	7.40334	7.76331	7.8794	8.24887	7.43042	8.07959	7.61816	7.50869	7.61743	7.86641	7.31646	7.21152	7.33618	6.85765	7.56163	6.97522	7.53422	7.81469	7.5036	7.38132	7.64342	8.10786	7.30617	7.24198	7.72839	7.35013	7.49892	7.30373	7.85166	7.72133	7.03777	7.78189	7.53212	7.88445	7.80619	7.85443	7.08547
ARL6IP4	11724684_a_at	5.28979	6.26795	6.02011	6.40365	6.06126	5.83981	6.5458	6.75925	6.49186	5.45032	6.1803	5.83066	5.97264	5.99723	5.95826	5.67547	6.28151	6.08941	6.31413	5.92745	5.77433	5.97738	5.67376	5.48795	5.94807	6.08044	5.93572	5.93067	6.02424	6.07384	6.28186	5.72812	5.59153	5.9965	5.70383	5.97227	5.88464	5.7267	5.97535	6.28433
ARL6IP5	11748862_s_at	9.97897	8.14707	8.57425	8.164	8.27006	8.3542	7.58368	8.97293	8.81569	9.5179	9.3439	9.36781	9.89096	9.14167	8.79171	8.89086	8.4067	8.98229	8.82834	9.20773	9.48961	8.96109	9.03078	9.00513	9.46238	9.10929	8.92189	9.35835	9.22364	9.14718	8.84475	9.20089	9.27299	8.89428	9.32126	9.08734	9.47024	9.45048	9.34192	8.60975
ARL6IP6	11739285_a_at	8.74639	6.66917	7.24555	6.85882	6.57567	8.16411	6.26046	8.20065	7.53561	8.27398	8.34629	7.88646	8.55022	7.96761	7.51899	7.46912	6.87169	7.90941	7.2593	7.97931	8.87154	7.75889	7.81039	8.04753	8.06125	7.79406	7.7441	8.38822	7.82839	7.94951	7.39779	8.12637	8.54088	7.40101	8.75568	8.11687	8.41093	8.23412	8.14316	7.24667
ARL8A	11736110_a_at	3.09759	3.65841	3.43969	3.81342	2.93716	2.75258	2.89389	3.14053	3.25633	3.27676	2.92828	2.99462	3.38243	3.02414	3.2842	3.05047	3.63872	3.25917	3.48684	3.03443	2.82531	3.33954	3.14735	3.21538	3.40117	3.135	3.41341	2.96722	3.15884	3.21538	3.37967	3.07491	3.40115	3.02691	3.32493	3.09613	2.68162	3.19336	3.06768	3.57891
ARL8B	11753616_s_at	6.20231	4.32123	5.06456	4.70553	4.25989	5.32668	3.51076	5.59352	4.31383	6.31934	5.63713	4.55393	6.30095	5.5881	5.09241	5.00503	4.33725	5.36861	4.56224	5.36551	6.06378	5.15224	5.82142	5.44898	5.82034	4.91562	4.65267	5.61117	5.55717	5.49718	4.42647	5.51359	5.40497	4.51277	5.96893	5.82862	7.06359	6.25665	5.81409	4.31498
ARL9	11742792_at	6.54872	3.45164	3.17501	3.72603	3.42345	3.55357	3.80895	2.50155	2.87895	3.27256	2.79571	3.43727	3.12744	3.11468	3.33302	3.19076	3.03664	3.14598	3.12991	3.02676	3.07866	3.08274	3.08156	3.1599	3.0999	3.34474	3.09226	3.1027	2.83655	3.24158	3.05392	3.12584	3.23712	3.31098	3.26777	3.345	3.23851	2.95927	2.95863	3.4117
ARMC1	11751777_a_at	5.87025	5.27011	5.2234	4.50652	4.90071	5.71322	5.27586	5.35678	5.36313	5.8855	5.56026	5.38032	5.6041	5.48838	5.16059	5.24725	5.22127	5.40902	5.00442	5.47803	5.48478	5.45588	5.14453	5.11043	5.5671	5.46378	4.81609	5.57796	5.12312	5.28928	5.28137	5.52744	5.07579	5.0407	5.56065	5.11547	5.68265	5.42122	5.60593	5.17877
ARMC10	11744690_a_at	6.02563	4.86172	4.97517	4.91108	5.31516	6.1565	5.64583	5.07155	5.22071	6.11588	5.89391	5.16265	5.94972	5.52095	5.19231	5.23602	5.2413	5.50056	5.21458	5.50984	5.8221	5.27268	5.5517	5.508	5.62336	5.375	5.53124	5.5795	5.56516	5.68989	5.27935	5.54617	5.82947	5.43297	5.80337	5.75635	6.00299	5.83845	5.78565	4.93661
ARMC12	11726495_a_at	3.0632	3.91244	3.71051	3.37232	3.87152	3.15489	2.93862	3.10141	3.87179	3.08206	3.14708	3.31227	3.32124	3.1301	3.5241	3.41104	3.18665	3.26316	3.22101	3.33237	2.80004	3.20575	2.88088	3.20194	3.12739	3.44159	3.84227	3.33549	3.13318	3.34258	3.47591	3.07856	3.742	3.36639	3.60708	3.32416	3.02963	3.14324	3.49413	3.53612
ARMC2	11743200_a_at	3.8389	4.19412	3.96448	3.90931	3.70684	3.66823	3.6813	3.79599	4.08909	3.51187	4.14751	3.43258	3.96588	3.76993	3.9417	3.92859	3.70725	3.96059	4.00288	3.74973	4.09029	4.00127	3.79435	4.58922	4.04171	3.67995	4.73325	3.82989	3.92607	4.15225	3.73118	3.70987	4.30552	3.96273	3.98632	3.64466	3.44823	4.14326	3.91429	3.56693
ARMC3	11746662_a_at	2.22047	2.68776	2.60009	2.41248	2.74095	2.61154	2.41331	2.64346	2.7187	2.73424	2.0658	2.55649	2.29804	2.71089	2.61812	2.37408	2.70027	2.62133	2.69197	2.55111	2.32532	2.57138	2.72271	2.49761	2.30703	2.83651	2.33754	2.33693	2.43143	2.50093	2.2251	2.30584	2.61958	2.682	2.20887	2.81564	2.29629	2.43403	2.46334	2.97012
ARMC4	11747541_a_at	1.94146	2.00276	2.04526	2.26989	1.88211	1.83682	2.11482	2.295	2.18477	1.95479	2.0779	1.95879	2.0053	2.10038	1.93989	1.94837	2.0928	1.86626	2.08056	2.01458	1.84692	2.02827	2.11819	2.10441	1.97553	2.12192	1.89841	1.97935	1.85915	1.89065	1.91505	1.85522	2.15574	2.43972	2.0995	1.9155	1.93472	1.85067	1.83444	1.95531
ARMC5	11749653_a_at	5.62627	4.74684	4.70332	5.08401	5.07719	4.95796	5.1095	4.56058	4.36146	4.59243	4.54165	5.31587	4.4677	4.84676	4.70221	4.91057	5.29934	4.74528	5.13824	4.74405	4.44098	4.80127	4.67016	4.66377	4.61152	4.89607	4.62367	4.57129	4.62367	4.77118	4.60536	4.77628	4.52893	4.6399	4.46667	4.38497	4.63234	4.98587	4.72543	4.47114
ARMC6	11748432_s_at	5.9584	4.91785	4.93691	5.32029	4.99301	5.40367	4.83934	5.00616	4.93313	4.98528	4.42281	4.83245	4.90496	4.9532	4.96195	4.75058	5.05105	4.981	4.82813	5.03697	4.34149	4.72489	5.14771	4.54245	5.21198	5.1764	5.08016	4.82631	4.93984	4.89757	5.2161	5.13766	4.9657	4.96415	4.87747	4.89603	4.96462	4.8569	5.15075	5.12879
ARMC7	11743309_at	5.51643	5.60713	5.51881	5.72372	5.80425	5.00706	5.9963	5.39327	5.59676	5.28884	5.10397	5.33683	4.99642	5.39474	5.77586	5.53068	5.61803	5.49961	5.34091	5.51092	5.81751	5.4272	5.48511	5.5786	5.50214	5.50233	5.63621	5.19671	5.65518	5.46192	5.69862	5.35998	5.73168	5.50963	5.48462	5.50537	5.294	5.49672	5.32406	5.89119
ARMC8	11733928_a_at	3.35864	2.82767	2.60874	2.99028	2.63857	3.19127	3.03964	2.77968	2.78211	3.11078	2.75498	2.80718	3.41188	2.98375	2.70583	2.60266	2.68193	3.13109	2.61077	2.95576	2.8658	2.98553	2.99821	2.73885	2.97861	3.07899	2.698	2.77528	2.71914	2.67719	2.70527	3.00426	2.97567	2.87017	2.77812	3.18874	2.8877	2.74684	3.28691	2.76274
ARMC9	11725828_a_at	2.42873	2.34335	2.21384	2.39005	2.57095	2.48904	2.37839	2.33788	2.18392	2.14906	1.99237	2.12709	2.00253	2.31161	2.15607	2.11322	2.27535	2.40138	2.67514	2.07878	2.01699	2.25428	2.21827	2.22773	2.33382	2.02324	2.42273	2.60301	2.43325	2.22134	2.58111	2.24648	2.39917	2.31356	2.12619	2.0074	2.05602	2.03537	2.25815	2.53061
ARMCX1	11720048_x_at	6.04612	1.97392	1.94915	2.10577	2.0571	1.95416	2.0493	1.9909	1.7273	2.45005	2.13497	2.15442	2.97996	2.20485	2.3243	2.12978	2.08884	2.3134	2.05893	2.3442	2.50846	2.18392	2.87627	2.40704	2.24215	2.19273	1.91624	2.21739	2.16207	2.3055	2.06113	2.40214	2.19042	2.22035	2.51241	2.52329	2.76968	2.56475	2.37606	2.31271
ARMCX2	11737781_a_at	3.09945	2.63271	2.21147	2.23325	2.5873	2.59942	2.38766	2.6489	2.34287	2.51242	2.38496	3.75043	3.44543	2.69015	2.73757	3.41582	2.79638	3.29254	2.71303	3.11604	3.23526	3.02481	3.41001	2.89365	2.53105	2.9846	2.3206	3.04783	2.53588	3.10625	2.61874	3.18509	3.00579	3.49164	3.89481	3.00204	3.83894	2.50842	4.55093	2.90411
ARMCX3	11721254_s_at	5.79013	3.90952	4.0148	4.20801	3.97208	4.50333	3.91621	5.23632	4.17034	4.99419	5.42716	5.04851	5.91346	4.96893	4.38301	4.51366	3.99257	4.77371	4.48844	5.00085	5.52453	4.84154	4.77677	4.80142	4.85463	4.76546	4.17621	4.78227	4.81334	4.65672	4.56658	5.0127	5.1412	4.53759	5.0232	4.79795	5.17764	5.039	4.8197	4.4124
ARMCX4	11747659_a_at	2.8465	3.49652	2.95167	2.79834	2.7498	2.5266	3.16419	2.71519	2.94092	2.96525	2.59234	2.63313	2.57526	3.2579	3.04187	3.02785	3.18326	2.8608	3.01344	2.70299	2.33781	2.77139	2.99669	2.6383	2.79275	2.93325	3.05976	2.98376	3.13655	2.77769	2.82545	3.00704	3.20991	2.87496	2.97022	3.18223	2.56736	2.9607	2.71519	2.95442
ARMCX5	11735720_s_at	6.22904	4.55813	4.84372	4.7536	5.30028	6.00373	4.77454	4.75331	5.43049	6.10464	5.75551	5.60798	6.15547	5.82247	5.47391	5.63441	5.19572	5.92588	4.76984	6.05083	5.95931	5.7379	5.83753	5.89742	5.75919	5.53179	5.17707	5.69881	5.17354	5.86552	5.68263	5.82242	5.6733	5.87381	5.59483	5.54799	5.95117	6.02688	6.08417	5.16977
ARMCX6	11758543_s_at	6.36738	5.36056	5.17476	5.80445	5.60798	5.42831	5.06027	5.90796	5.55849	6.47037	5.91355	6.30462	6.36841	5.68079	5.90557	5.8017	5.67174	6.09431	5.92973	5.98541	5.90196	6.03363	6.2754	5.91937	5.99322	6.17593	5.66666	6.13082	5.93852	5.72044	6.27042	6.41015	5.92122	6.25273	5.83852	6.04461	6.01125	5.9453	6.35123	5.74875
ARMS2	11729447_at	3.9455	5.11685	5.16719	5.17954	5.18604	4.16389	5.15373	4.30384	4.80658	4.40652	4.33088	3.45648	3.82003	4.83292	4.75583	4.7252	5.00616	4.4342	4.77137	4.24392	4.53287	4.41362	4.37629	4.65882	4.48581	4.70312	4.45615	4.5127	4.40869	4.53559	4.548	4.69842	4.6504	4.48388	4.3205	4.49269	4.00143	4.50601	4.1959	4.74525
ARMT1	11723224_s_at	6.73373	4.43154	5.7362	4.56518	4.15532	4.69421	4.08672	5.80319	5.18551	6.83327	5.84905	5.62142	6.85839	6.12809	5.26173	5.27331	4.79265	5.79626	5.16223	5.84701	6.39974	5.53944	5.80098	6.01255	6.06051	5.39497	5.43983	5.94497	5.81331	5.76552	5.31906	6.15696	6.45164	5.69937	6.37873	6.38475	6.70888	6.5299	6.15973	5.07157
ARNT	11742052_a_at	3.68395	4.31142	4.56266	4.78143	4.99153	4.22456	5.15703	3.80595	5.07911	4.23727	4.40657	3.90431	4.40603	4.16044	4.01156	4.28189	4.72631	4.21625	4.44386	4.16622	4.25789	4.32901	4.39003	3.9376	4.10313	4.65416	4.30215	4.06098	4.25136	4.50074	4.12094	4.43104	4.14631	4.71078	3.88835	4.20999	4.25432	4.37941	3.98154	4.65017
ARNT2	11762216_x_at	2.54306	3.61157	3.44592	3.41561	3.21361	2.8144	3.66552	2.47373	2.84772	2.6416	2.72343	3.03588	3.0419	2.98229	3.30564	3.05225	3.10095	2.97733	3.3448	2.7569	2.72759	3.0628	2.67548	2.40345	2.59708	3.03588	2.91316	2.66148	2.80235	3.0347	3.06743	2.71013	3.3081	2.85085	2.71172	2.85319	2.92957	2.64352	2.62398	3.45258
ARNTL	11753127_a_at	4.46591	5.08499	5.00644	4.89564	4.80877	4.63588	4.58048	6.12124	5.43431	5.4453	5.86035	5.4099	5.74472	5.68771	5.90045	5.80078	5.14978	6.04799	5.92767	5.60616	5.97468	5.83593	5.49897	5.91786	5.92149	5.89712	6.03746	6.06332	5.9159	5.6901	5.30284	5.83346	6.16661	5.48156	6.35203	5.58696	5.96782	5.3896	5.89053	5.43126
ARNTL2	11746242_a_at	4.59511	2.99788	2.89013	2.93817	3.10836	3.17318	3.02959	2.59707	3.15745	3.51532	3.01425	2.94668	3.09172	3.02345	2.71538	2.6072	3.20735	2.64512	3.0241	2.88342	2.79914	2.89013	2.96132	2.79142	3.03234	3.13962	2.86605	2.95233	2.91188	3.00579	3.08034	2.87588	2.74458	2.41345	2.95655	2.9063	3.19724	2.92388	2.55615	3.03672
ARPC1A	11715610_a_at	6.75659	6.36899	6.52605	6.70846	6.35011	6.81394	6.3705	7.31656	6.26029	7.2658	7.3725	7.26448	7.53421	6.97382	7.3245	7.12969	5.94077	7.03196	6.84577	7.22981	7.93402	7.08053	7.37291	7.40924	7.51527	6.90833	7.24558	7.27711	7.46012	7.24116	7.21075	7.17291	7.57867	7.11468	7.22671	7.12447	7.74962	7.34708	7.20662	6.74103
ARPC1B	11744077_at	10.3465	9.5797	10.038	9.96713	9.42093	9.27753	8.73116	10.8556	9.76711	11.0332	10.7557	10.97	11.0471	10.5132	10.9413	10.7559	9.75067	10.627	10.4848	10.5193	11.2015	10.6285	11.1126	11.1884	11.1216	10.5582	10.9095	10.8115	11.0423	10.9441	10.8334	10.6248	11.1047	10.531	10.97	10.8328	11.5029	11.077	10.9354	10.3862
ARPC2	11742870_at	11.6605	10.3534	10.8565	10.3836	10.4604	10.5273	9.48765	11.5347	10.5644	11.5785	11.3132	11.5468	11.4509	11.2749	11.5708	11.2435	10.5153	11.2727	11.0473	11.5587	11.6642	11.4326	11.7843	11.817	11.5284	11.2846	11.7111	11.7303	11.4645	11.4877	11.6306	11.423	11.6406	11.3269	11.9087	11.4945	11.919	11.6528	11.6269	10.944
ARPC3	11757552_x_at	11.3408	10.0107	10.5949	10.0182	9.87879	10.2033	9.37007	10.8076	10.1755	11.1567	11.0788	11.0641	11.4221	10.9569	10.8724	10.664	9.97398	10.6768	10.3849	10.9852	11.4566	10.7518	11.4342	11.2397	11.1255	10.8998	11.1294	11.2243	11.1024	11.1201	10.6014	10.957	11.1609	10.6845	11.3255	11.0371	11.3328	11.1129	11.0936	10.4838
ARPC4	11758113_s_at	9.19075	7.87613	7.87233	7.63235	7.76661	7.81123	7.92781	8.81599	8.39756	8.50495	8.65499	8.77015	8.96481	8.31149	8.63331	8.45236	7.71781	8.47015	8.24514	8.25577	8.00941	8.34963	8.78922	8.51897	8.71238	8.19737	8.70027	8.55131	8.62716	8.50497	8.49731	8.43536	8.66332	8.1371	8.49474	8.3891	8.98282	8.51054	8.58531	8.37951
ARPC5	11715687_x_at	10.1853	8.92658	9.80144	9.45599	8.78612	9.20823	8.43511	10.1856	9.50878	10.1574	10.1775	9.80906	10.0879	9.90471	10.2737	10.0619	9.27209	10.1834	9.9422	10.1944	10.8742	10.0756	10.2	10.3793	10.5011	10.211	9.90556	10.3142	10.4284	10.2014	9.64836	10.0594	10.8702	9.95249	10.5341	10.2369	10.5746	10.3056	10.2525	9.4125
ARPC5L	11721826_x_at	5.51092	3.17634	3.60694	3.34954	3.86164	3.91889	3.04125	4.19697	3.93247	4.53323	4.05035	4.69757	4.28472	4.00804	4.03995	3.67896	3.65783	4.00859	3.74382	4.37715	4.18781	4.42011	4.02069	4.25218	4.6825	3.97066	4.05268	4.40904	4.2123	3.95247	4.46696	4.0374	3.71702	3.91233	4.4955	3.99807	4.91546	4.35879	4.61752	3.78928
ARPIN	11736175_a_at	3.97499	4.52253	4.63879	4.35001	4.59105	4.03379	4.88835	3.66883	4.00863	4.38271	3.81728	4.0826	3.5914	4.47859	4.34537	4.5732	4.8051	4.29575	4.24177	4.04038	4.16106	4.3116	4.88471	4.29561	4.29511	4.49578	4.40601	4.07476	4.33831	4.61425	4.64625	4.46307	4.55468	4.33983	4.22854	4.16396	4.02151	4.28586	4.29831	4.63051
ARPP19	11742557_s_at	6.2137	3.30213	4.33185	3.78985	3.28799	4.24637	3.57103	3.97794	3.66156	4.79452	4.58922	4.33057	5.20286	4.52438	3.87396	4.10058	3.62081	3.93433	3.63045	4.19481	5.3349	4.04333	4.54421	4.79493	4.68105	4.13515	3.85959	4.60624	4.48963	4.49964	4.02057	4.80313	4.37385	4.09903	4.41211	4.53553	4.4426	4.65442	4.55401	3.88831
ARPP21	11733424_a_at	1.82645	1.79935	1.86897	1.90941	2.00332	2.05479	2.14013	2.03241	2.08289	1.89603	1.70312	2.03241	2.07951	1.99185	1.94213	2.06602	2.09834	2.1018	1.971	1.61036	1.95009	1.67484	1.85551	1.98446	1.92896	1.8114	1.99496	1.9705	1.92976	1.97595	1.76546	1.8584	1.97203	1.72751	1.90964	1.9016	1.89424	2.01539	1.91782	1.93173
ARR3	11730482_a_at	3.46346	4.66301	3.76278	4.49222	4.12522	3.49003	4.17344	3.91793	4.65867	3.96607	3.46148	3.72944	3.23151	3.72578	3.82904	3.92864	4.14524	3.55588	3.98054	3.80816	3.51642	3.7953	4.05467	3.90485	3.87229	3.9924	3.86348	3.89918	3.95365	3.95587	3.87641	3.77507	3.86959	3.69853	3.91541	3.93925	3.66443	3.84741	3.61953	3.93926
ARRB1	11760185_s_at	3.91709	4.76181	4.59265	4.47184	4.66574	4.12163	5.32275	4.59941	4.98717	3.80809	4.3756	4.16344	4.20208	4.13497	4.27259	4.30364	4.64913	4.6672	4.67635	4.49249	3.63247	4.3828	4.07863	4.02718	4.32094	4.75784	4.23633	4.38308	4.46912	4.30399	4.58332	4.22644	4.38919	4.36019	4.05609	4.26875	3.72615	4.27916	3.81107	4.63839
ARRB2	11749573_a_at	6.84511	7.65983	8.73217	7.76791	7.11243	6.63818	7.8257	8.54371	7.74807	7.85224	8.55433	8.42621	8.12578	7.89538	8.45941	8.24291	7.47236	7.95687	8.05674	8.23073	8.91339	8.082	8.08903	7.93633	7.91885	7.90224	8.6446	8.05665	8.2422	8.18349	7.69815	7.75113	8.38778	7.98943	8.10896	7.78239	7.77124	8.2317	7.80229	7.47772
ARRDC1	11756644_x_at	6.95226	7.57359	7.54606	7.83772	7.67916	7.17872	7.86256	7.79054	7.39376	7.28507	7.42841	7.57818	7.18593	7.40015	7.87166	7.56988	7.6995	7.53355	7.74694	7.49444	7.4582	7.54608	7.41214	7.40231	7.52681	7.39834	7.90294	7.38059	7.42833	7.61372	7.51741	7.38883	7.57326	7.59325	7.11475	7.65051	7.00063	7.33228	7.20858	7.74023
ARRDC2	11719148_a_at	8.09227	7.76585	7.83549	7.0031	7.26185	7.76931	8.19916	7.7076	7.99155	7.41045	7.83428	8.17557	8.48817	7.15016	7.04925	7.60729	7.10303	7.25919	7.21253	7.39909	7.47541	7.29544	7.40533	7.43132	7.62856	7.28522	7.39924	7.79925	7.68681	7.47673	7.64003	7.92859	7.17505	7.38055	7.41799	7.401	7.89488	7.30286	8.03609	7.26424
ARRDC3	11718724_at	5.40837	4.98438	5.3817	5.35916	4.9501	4.21558	4.47855	6.88187	5.71277	6.26012	6.60772	6.22995	6.85131	6.57913	6.37917	6.67595	5.39832	6.3309	5.94123	6.46122	7.65265	5.97954	6.70582	7.07409	6.44864	6.16393	6.30173	6.80105	6.52757	6.60198	5.9785	6.1314	7.54357	6.39555	7.72467	6.71216	7.44807	6.1043	6.92789	5.41107
ARRDC4	11719760_at	3.94631	4.2243	4.3694	4.09999	4.24574	3.71156	4.43319	4.09449	4.42137	3.94976	4.19257	3.78856	3.93237	4.43319	4.23202	3.80838	4.35799	4.11038	4.94021	4.20857	4.4433	4.04118	3.98585	3.82262	3.90144	4.87969	4.19524	4.08058	3.88621	4.73408	4.07925	4.29924	4.87347	4.10001	4.19513	4.15976	4.20879	4.47516	3.86617	3.8816
ARRDC5	11715110_at	5.58339	6.6884	6.51326	5.79824	7.03348	5.95357	6.2684	6.64685	6.33143	6.16087	5.96053	6.80568	6.8122	6.37824	6.32076	6.46735	6.2684	6.57364	6.46926	6.558	5.93758	6.51111	6.0744	6.04713	6.3969	5.93027	6.29871	6.51781	6.305	6.35858	6.37691	6.31678	6.04483	6.3986	6.01018	6.45537	6.45763	6.10411	6.947	6.59891
ARSA	11749081_x_at	4.40855	5.43364	5.33903	5.72005	5.40763	4.42472	5.70065	5.17566	5.08333	4.86716	5.07377	4.19546	4.59701	4.93855	5.03604	5.06053	5.54643	4.87969	5.35528	4.74014	4.13275	4.68253	4.88322	4.75844	4.9776	5.1034	5.06546	4.79172	5.01059	5.07433	5.15387	4.66075	5.01244	4.65467	5.09398	5.07378	4.56271	4.75769	4.7217	5.33644
ARSB	11732740_at	3.3824	3.3893	3.43465	3.41561	3.38622	3.22008	3.58465	2.98918	3.4803	2.99144	2.65617	3.21952	2.90456	3.425	2.94202	3.23853	3.29121	2.902	3.51782	3.15615	3.13733	2.96398	3.29276	3.46331	3.42224	3.16911	3.25198	3.21992	3.34462	3.48066	3.13124	3.10492	3.30911	3.33371	2.98764	3.39397	2.90716	3.06257	3.25517	3.23265
ARSD	11738344_at	2.59742	3.36022	2.82778	3.04546	2.72443	2.66552	3.03317	2.84175	2.75501	2.55697	2.62434	2.45138	2.37943	2.85663	2.80016	2.55117	3.17298	2.55856	2.85522	2.4977	2.45067	2.73939	2.37336	2.33936	2.57516	2.69104	2.73918	2.35388	2.46226	2.5609	2.64052	2.71785	2.32516	2.69641	2.30963	2.75242	2.44209	2.77828	2.5025	2.79933
ARSE	11745400_a_at	3.13479	3.86048	3.72782	4.03543	4.71256	3.71863	4.59941	3.73096	3.88386	3.18112	3.37416	3.29763	3.21111	3.85198	3.78195	3.12326	3.95531	3.62617	4.02345	3.29896	3.44342	3.58152	3.45286	3.49675	3.36097	3.25703	3.67065	3.11586	3.35645	3.38201	3.37478	3.32603	3.2779	3.75365	3.25469	3.58543	3.15527	3.39288	3.02127	3.67208
ARSF	11737743_a_at	3.99525	4.26463	4.31081	4.49712	4.35597	4.03537	4.34873	4.48593	3.91036	3.75806	3.8989	3.84001	3.61453	4.24774	4.13592	4.13084	4.19897	4.12777	4.46165	4.18885	3.97112	4.35133	4.23159	4.09322	4.01136	4.16349	3.82805	3.83528	4.01781	4.1521	4.47521	4.0679	4.14177	4.18554	4.06468	3.99807	3.99969	3.71774	3.99236	4.28627
ARSG	11726921_a_at	4.97407	6.46585	6.03593	6.34134	6.36046	5.93271	6.51125	6.42478	6.03022	6.00365	6.02158	6.0276	5.67461	6.09589	6.29162	6.3965	6.42721	6.34816	6.50856	6.11691	6.00176	6.22417	6.12717	6.19055	6.15147	6.08424	6.38771	5.9239	6.15423	6.21051	5.9247	6.15678	6.48574	6.134	5.98896	6.24762	5.9863	6.2147	5.98588	6.01391
ARSH	11737616_at	1.79641	2.67629	2.18686	2.12956	2.4119	2.10898	2.71505	1.95671	2.20354	2.16481	1.94581	1.95943	2.27346	2.28715	2.01593	2.2153	2.6475	2.21839	2.39728	1.90551	2.14239	2.42395	2.03412	2.18801	2.16481	2.07159	2.26672	2.07159	2.14541	2.35292	2.34594	2.15758	2.29854	2.02156	2.08154	2.03511	1.774	2.14137	2.19018	2.31497
ARSI	11726184_at	3.20338	4.67891	4.3621	4.73333	4.77864	3.52693	4.82637	3.90056	4.08909	3.98604	3.44513	3.65992	3.27352	4.25422	3.8849	3.93488	4.54498	3.60865	4.18035	3.84206	3.36318	3.57827	3.95697	3.8492	3.76867	4.19456	4.09087	3.91745	3.60163	3.87622	3.87959	3.6867	3.63422	3.93396	3.57371	3.85545	3.11754	3.76644	3.53913	4.14571
ARSJ	11746863_x_at	1.74718	2.8392	2.79831	2.38839	2.46216	1.88732	2.37749	2.26676	2.29411	1.78211	2.29595	2.03676	2.45555	1.9842	2.12858	2.09941	1.97737	2.22674	2.28531	2.10036	2.20874	1.84922	2.23042	2.15376	1.9815	2.12789	2.49596	2.08651	2.01607	2.0294	2.23855	2.19734	2.30451	2.36055	2.06266	2.12192	1.58169	1.96179	2.13811	2.52154
ARSK	11740175_a_at	2.98245	3.06011	3.00761	3.07499	3.64244	3.20507	3.26568	2.83339	2.89967	3.03065	2.86651	3.69564	3.18702	3.19217	3.24104	3.56662	3.17916	3.00766	3.53535	2.95334	2.85768	3.0484	3.07266	2.84149	3.21158	3.30572	3.15123	3.70407	3.16876	2.97762	3.26349	3.156	2.60829	3.33911	3.69715	2.9904	3.12951	3.37349	3.4139	3.16944
ART1	11741918_at	4.83796	6.0537	5.89592	5.88008	6.10042	5.27633	6.38224	5.37059	6.01011	5.29389	5.0977	5.15522	5.36122	5.22068	5.45175	5.2233	6.05488	5.36559	5.62949	5.31489	5.26899	5.36014	5.08389	5.27525	5.15655	5.51171	5.54803	5.16509	5.36559	5.44513	5.59866	5.239	5.34167	5.45716	5.1435	5.26072	4.92382	5.26147	5.06135	5.52103
ART3	11728521_a_at	1.74698	1.80716	1.82483	1.91212	1.7903	1.97945	1.70964	1.89824	2.30995	1.79622	2.09497	2.28059	1.95994	1.82513	1.88179	1.77713	1.85938	1.74311	1.94106	1.62324	1.99482	1.76284	1.92371	1.66182	1.71936	1.77136	1.85678	1.78598	1.81169	1.74409	1.82127	1.85375	1.74409	1.86132	1.9885	1.9534	1.72542	1.75845	1.66347	2.03991
ART4	11729335_a_at	2.90297	3.4769	3.52435	3.76023	2.91848	3.64096	4.1907	2.83047	3.07134	2.67626	2.88948	2.6316	2.62576	2.97158	2.89567	2.90998	3.11664	2.95855	3.07504	2.91831	2.54292	2.93287	2.85049	2.64964	2.64755	3.01192	2.66295	2.38631	2.71788	2.76054	2.76588	2.90133	2.73383	3.05276	2.97141	2.53226	2.82954	3.05527	2.54469	3.04569
ART5	11735519_a_at	3.32804	4.25497	4.05006	4.21545	4.12063	3.69	4.40253	3.75134	3.84761	3.70755	4.20458	4.02231	3.63144	3.8255	3.55434	3.67062	3.97595	3.62134	4.0608	3.37747	3.53219	3.78827	3.58385	3.69588	3.51532	3.9048	3.46481	3.73395	3.86376	3.8181	3.80975	3.9625	3.81234	3.68856	3.54517	3.83436	3.32144	3.49004	3.2077	3.9692
ARTN	11737223_a_at	6.01255	4.83504	4.64547	4.75615	5.1657	6.03667	5.53551	4.8473	4.44839	4.17641	4.0348	3.65599	3.68235	4.53614	4.37428	4.39529	4.72546	4.46342	4.55725	4.01797	3.89433	4.48265	4.10613	4.25445	4.14656	4.49819	4.26226	4.17539	4.22755	4.43043	4.60461	4.3818	4.08909	4.57015	4.16464	4.42242	3.89622	4.12768	4.0625	4.18602
ARV1	11738018_a_at	6.2426	5.7205	5.60724	5.70426	5.91534	6.2071	5.72902	5.7442	6.14328	6.68259	5.8817	5.78877	6.42718	5.99579	5.92852	5.77155	5.72558	5.99393	5.6713	6.10589	6.11509	5.99268	6.48185	6.19281	6.2316	5.87408	5.74088	6.33773	5.76712	6.01375	6.07542	6.56293	5.8581	6.21382	6.21677	6.36421	6.20978	6.1581	6.3018	5.76394
ARVCF	11728133_a_at	3.95064	4.60155	4.39251	4.76222	4.48729	4.00373	4.9715	3.72274	4.28561	3.95589	4.20634	4.05213	3.47827	4.05802	4.10391	4.29834	4.72418	4.08832	4.46756	3.89323	4.02168	4.33234	4.27137	3.69715	4.04909	4.15038	4.42763	3.90532	4.26956	4.00503	4.28986	4.09116	4.15982	4.12313	3.52661	4.14416	3.51774	3.9233	3.9196	4.77848
ARX	11731211_at	2.11187	2.40583	2.91925	2.21752	2.83727	2.00864	2.46834	2.22059	2.20274	2.31158	2.27725	2.49578	2.04591	1.89929	2.33479	2.47325	2.43007	2.2698	2.43448	2.09604	2.17165	2.15884	2.45589	2.30475	2.24006	2.24212	2.21172	2.30439	2.30181	2.45326	2.21021	2.22989	2.29869	2.25274	2.19833	2.3296	2.26611	2.0667	2.19833	2.1952
ASAH1	11740580_at	6.07966	6.05409	4.60731	5.18006	4.27808	4.73331	3.02066	6.20747	4.83284	7.77524	6.32615	6.17495	6.14532	4.62049	6.15285	6.54507	5.42768	6.60711	5.65143	4.74594	6.49555	4.80988	7.6059	7.85928	6.2572	4.15861	7.44998	6.3612	5.30281	3.38731	6.90267	7.01151	6.773	3.06456	7.52368	7.88261	7.24637	6.94545	5.29092	6.0804
ASAH2B	11760913_at	3.12292	2.96014	2.77976	2.83575	3.21832	3.1513	3.20358	3.38944	3.38435	2.78001	3.24417	3.34031	3.36473	2.98971	3.04546	3.06286	2.8059	3.17969	3.20042	3.21127	3.52851	3.31743	3.22963	3.45438	3.23218	3.15367	2.98833	3.38376	3.06981	3.33295	3.7148	2.99725	3.68403	2.93051	3.5101	2.9075	3.77894	3.00055	3.52254	3.30551
ASAP1	11717281_a_at	6.03067	5.91487	6.2056	6.30313	5.74115	5.04314	5.4946	6.92766	5.80894	6.48451	6.71167	7.21467	6.27652	6.24939	7.47219	7.2812	5.89232	6.64423	6.84848	6.37842	7.59179	6.53797	6.86778	7.45401	6.3315	6.40261	7.85351	6.57181	6.92563	6.71424	6.8415	6.35048	7.44227	6.56305	7.37478	5.88414	7.13625	6.52961	6.47001	6.68175
ASAP2	11725923_s_at	5.95931	2.76766	2.96149	3.99057	3.56461	5.44792	3.37786	3.71879	2.9503	5.06784	3.80868	3.46047	3.79813	3.70325	4.05498	3.63039	3.67305	4.15781	4.51874	3.47634	4.09057	3.77624	3.7968	3.91192	4.70218	4.21937	3.30049	4.04869	4.16922	3.43633	3.45692	4.01312	4.27614	3.82438	3.42733	3.97043	3.47538	4.12753	3.38967	3.50248
ASAP3	11721759_a_at	2.76543	3.61339	3.16485	3.25789	3.63241	3.37128	3.93401	2.56299	2.84604	2.72931	2.89284	2.79426	2.38226	3.15681	3.09803	3.26119	3.37921	3.24788	3.20852	2.88621	2.68668	3.00479	2.77623	2.82859	2.95316	2.99313	3.06329	2.92496	3.12666	3.01861	3.20495	2.86381	2.91366	3.09688	2.65899	2.81318	2.44896	2.73137	2.81883	2.99085
ASB1	11729272_a_at	5.45126	5.70709	5.50943	5.37788	5.96743	6.48655	5.74998	5.91109	5.20975	5.54491	5.9263	6.58827	6.21373	5.82679	6.02995	6.28219	5.54695	6.30147	6.00911	6.35488	6.03188	6.29679	5.80905	6.30269	6.09054	5.97599	6.30709	6.35394	6.00911	5.95561	6.42836	5.96487	5.72508	5.9401	5.99976	5.74165	6.3535	5.81254	6.70972	5.60414
ASB10	11741584_a_at	2.57698	3.45267	2.90547	3.44305	3.39662	2.86269	3.50068	3.24016	2.77599	2.58367	3.03161	2.31518	2.43725	2.69042	3.0572	2.89967	3.22145	3.02181	3.05813	2.58995	2.59558	2.92354	3.03723	2.76472	2.7468	3.00305	2.75447	2.91092	2.86662	2.80281	3.18741	3.09821	2.87415	2.94101	2.82868	3.14024	2.80676	2.90794	2.80042	3.03252
ASB11	11759375_at	1.72614	1.67972	2.25101	2.10293	2.08134	1.75677	2.11449	1.83706	1.98793	1.75527	1.47737	2.36436	1.6144	1.76916	1.67663	1.77046	1.87122	1.81475	1.81475	1.79693	1.73091	1.90732	1.62691	1.60145	1.76769	1.72614	1.93743	1.82038	1.92976	1.8242	1.89476	1.81475	1.73338	1.90505	1.88284	1.91239	1.75692	1.97934	1.71554	1.89662
ASB12	11732539_a_at	3.16502	3.60485	3.30475	3.6885	4.05183	3.45058	3.79114	3.08326	3.34333	3.06189	3.25373	3.47633	3.13409	3.30333	3.28469	3.5238	3.74781	3.4509	3.35351	3.28235	2.8832	3.31496	3.49605	3.29836	3.29326	3.42604	3.53917	3.01593	3.33334	3.2149	3.45931	3.37192	3.22608	3.39222	3.22359	3.11364	3.01796	3.10263	3.29249	3.3308
ASB13	11746203_a_at	4.84564	4.63019	4.26324	4.57263	4.83052	4.49073	4.99148	3.89763	4.24589	4.26602	4.27077	3.81045	3.75997	4.12447	3.93165	4.09798	4.59942	4.02975	4.50654	3.83974	3.45819	4.12768	3.82323	3.99023	3.88263	4.10929	4.10564	3.99807	4.23303	4.12024	3.85704	3.87984	4.23506	4.47655	3.99308	4.19075	3.80372	3.94113	3.98368	4.55497
ASB14	11762738_at	2.30973	2.23076	2.05457	2.37928	2.5035	2.08409	1.8755	2.01787	2.51441	2.2742	2.28045	2.40542	2.51685	1.99558	2.47209	2.31562	2.37717	2.33216	2.05881	2.26647	1.82046	2.37815	2.4348	2.19849	2.17254	2.51885	2.04756	2.56794	2.02815	2.29569	2.29828	2.32084	2.31093	2.38515	2.09198	2.16727	2.42922	2.31727	2.21662	2.44541
ASB15	11735549_at	3.52694	4.84	4.26324	4.53869	4.73749	4.12215	4.71912	4.57921	4.56505	3.95272	4.51803	3.91174	3.88697	4.45774	4.33113	4.25178	5.07117	4.37933	4.7714	4.27846	3.89032	3.91745	4.03613	4.17703	4.13183	4.36709	4.26574	4.42579	4.37933	4.63969	4.56579	4.23573	4.28887	3.97838	3.87947	4.24473	4.06768	4.27031	3.76636	4.51433
ASB16	11737348_x_at	5.55626	7.00592	6.73263	6.90807	6.93654	6.38546	7.11932	6.46577	6.20398	6.12204	6.19438	6.01054	5.65262	6.36212	6.24063	6.20773	7.16376	6.43229	6.67688	6.27611	5.67911	6.29105	6.02065	6.04647	6.25648	6.50811	6.49234	6.13825	6.26314	6.31279	6.60344	6.30054	6.1285	6.39268	5.87014	6.20674	5.55139	6.20988	5.85661	6.70936
ASB17	11728151_a_at	2.72701	2.96891	3.28259	3.21897	2.89669	2.86483	2.99054	2.78427	3.27055	2.75604	2.67455	2.86597	2.71328	3.00285	2.8534	3.02332	3.17048	3.22825	3.27758	3.23394	2.95587	3.19312	2.85853	3.09659	2.86209	3.08206	3.00882	3.15505	2.71697	2.78188	2.7944	3.18519	3.01294	2.89779	3.01483	2.71519	2.73821	2.95051	3.04571	3.07391
ASB18	11742489_at	3.66489	4.38738	4.03876	4.74988	4.38121	3.83529	4.56964	3.95153	4.08355	3.9806	4.36873	4.19133	3.93767	4.20017	4.26295	4.07009	4.42427	4.23746	4.31144	4.00497	3.65188	4.41722	4.081	4.08863	4.05135	4.19133	4.28357	3.92807	4.09096	4.04785	4.28248	4.11168	4.24799	4.2853	3.7807	4.13865	3.95764	3.95542	3.8682	4.62452
ASB2	11725239_a_at	3.13925	3.28438	3.5188	3.33899	3.16022	3.01254	3.88632	4.7318	3.94206	3.28016	3.38701	3.70004	2.83831	3.58247	3.76452	3.56822	3.68455	3.31752	4.0183	3.90547	3.70739	3.70134	3.38746	3.49317	3.66798	3.40687	3.5304	3.52711	3.95762	3.10045	3.46943	3.67994	3.16465	3.49633	3.19968	3.80853	3.50452	3.60767	3.42021	3.82448
ASB4	11759469_s_at	2.1733	3.36109	3.02247	3.18896	2.9678	2.69617	3.66893	2.25572	2.75736	2.57327	2.65943	2.5624	2.46488	2.66837	2.95274	2.55548	3.07316	2.96341	2.85134	2.82431	2.63303	2.60459	2.62658	2.5002	2.64242	2.64759	2.91896	2.64935	2.72787	2.89194	2.50617	2.5446	2.55522	2.81887	2.63303	2.68454	2.49417	2.60625	2.36098	2.83507
ASB5	11729324_s_at	1.75634	1.9984	1.99061	1.60687	2.13484	1.92861	1.91065	2.02992	2.13012	1.9052	2.18079	1.75526	1.73652	1.82402	1.87701	1.94837	1.92361	1.91472	1.94438	1.76473	1.77546	1.89722	2.00109	1.55586	1.70271	1.94226	1.92585	1.72929	1.92684	1.76527	1.76473	2.07322	1.82628	1.85682	1.8472	1.82046	1.57051	1.68776	1.88508	1.95531
ASB6	11726924_a_at	5.37315	5.39333	6.17383	5.33766	5.27393	5.5229	5.6141	5.72167	5.52512	5.2937	5.59908	5.84531	5.85745	5.34124	5.94208	5.85445	5.39795	5.41687	5.46955	5.69934	5.97377	5.50629	5.55044	5.63711	5.75173	5.1936	6.11767	5.67941	5.69339	5.35938	5.39594	5.40349	5.56887	5.64977	5.43195	5.22039	5.61477	5.62626	5.97945	5.3906
ASB7	11723870_at	3.74916	4.27194	3.8512	4.10123	3.65999	3.72809	4.36026	3.29833	4.43309	3.55699	3.66689	3.0969	3.66689	3.90621	3.7589	3.80437	3.75254	4.07486	3.84761	3.69226	3.92838	3.67049	3.52717	3.61115	3.57896	4.10088	3.55046	3.99807	3.60279	3.48424	3.84387	3.95471	4.01249	3.73695	3.61047	3.61334	3.8389	3.77676	3.70455	3.75773
ASB8	11751585_a_at	6.99423	6.08159	6.60192	6.32035	6.19802	6.39566	6.323	7.06907	6.49006	6.983	6.42025	6.51815	6.33505	6.65224	7.1458	6.94296	6.16966	6.90591	6.75825	6.27329	6.42345	6.74554	6.64584	6.9581	6.86568	6.71311	6.84162	7.01079	6.75225	6.63987	7.11088	6.62146	6.93866	6.34673	7.19217	6.51433	7.23102	6.61904	6.77619	6.81033
ASB9	11724444_a_at	4.04156	2.85787	2.80408	2.94132	2.71282	2.76894	3.00157	2.67101	2.52445	2.62843	2.48061	2.60646	2.49959	2.45311	2.80521	2.61941	2.82563	2.65876	3.00492	2.5428	2.60905	2.63016	2.77597	2.59235	2.44202	2.59089	2.89762	2.51537	2.71684	2.61845	2.72663	2.49717	2.68888	2.65876	2.4383	2.62796	2.74789	2.84053	2.73036	3.04643
ASCC1	11748278_x_at	7.37847	4.50459	4.29666	4.46362	4.77364	5.80783	3.8342	5.08064	4.53402	4.92367	5.11057	4.9716	5.09345	4.94292	4.53007	4.77296	4.54287	4.55126	4.64157	4.81164	4.75901	4.61793	4.94483	4.64912	5.39283	4.81711	4.83748	4.91974	4.79536	4.68041	4.80012	5.06565	5.19194	4.56571	5.41384	4.87741	5.37686	4.95933	4.93019	4.71198
ASCC2	11717449_a_at	6.41074	8.369	8.27976	8.69405	8.64156	7.5451	8.93551	7.71207	8.53982	7.32485	8.41952	7.31745	6.74716	8.22548	7.77446	7.71553	8.35576	8.10223	8.5998	7.67692	8.04298	7.73998	7.35311	6.94977	6.96849	7.94117	7.29548	6.90933	7.50076	7.19618	7.06285	7.60979	6.81794	7.77621	6.62115	7.18678	6.00607	7.19063	6.46528	8.03799
ASCC3	11750647_a_at	2.69569	2.17235	2.17744	2.31939	2.49469	2.63829	2.40091	2.28747	2.10567	2.37669	2.40088	2.69744	2.35738	2.39917	2.26635	2.43469	2.35379	2.51652	2.31058	2.27461	2.06266	2.50996	2.36733	2.19349	2.67903	2.46876	2.31506	2.40074	2.31639	2.36375	2.28061	2.27061	2.44157	2.45371	2.42331	2.48075	2.23649	2.4498	2.33941	2.49153
ASCL1	11726674_at	2.37317	2.26356	2.5303	2.22812	2.4582	2.03878	2.12719	2.71519	2.46695	1.95673	2.78842	2.65872	2.39259	2.32837	2.31927	2.47325	2.25844	2.13812	2.17576	2.33846	2.52344	2.32983	2.3279	2.24853	2.22976	2.12724	2.44291	2.72329	2.54584	2.35874	2.54087	2.32324	2.24613	2.29439	2.19825	2.25091	2.37591	2.34	2.63034	2.3798
ASCL2	11742938_at	7.38905	6.82998	7.01057	7.12914	6.75415	6.00368	6.74132	7.14788	7.06944	7.04297	6.98376	6.86715	6.79439	6.79935	6.80833	6.81266	7.21974	7.38336	6.93186	7.2564	6.61279	6.97404	7.07569	6.90015	7.77228	7.04439	7.06149	6.87906	6.96703	6.4077	6.93763	6.95782	6.87003	6.79206	6.23639	7.13229	6.83628	7.2405	6.24308	6.74652
ASCL3	11742171_at	3.46516	4.79236	4.71705	5.12128	5.18644	4.27315	5.54697	3.84339	4.28236	3.88267	3.74097	3.67469	3.69243	4.41108	4.20632	4.56711	4.71276	4.36421	4.66856	4.37763	3.42757	4.31647	4.04906	4.09487	4.11919	4.07632	4.24827	4.14108	4.27463	4.22626	4.26263	4.11969	4.10707	4.57164	3.50668	4.21757	3.53408	4.14339	3.58819	4.91534
ASCL4	11734512_at	3.88439	4.89201	4.70174	5.32313	4.88997	4.19472	5.62287	4.35298	4.51771	4.2165	3.93528	3.74042	3.74832	4.53273	4.22272	4.42952	5.28627	3.94527	4.92082	3.93948	3.46483	4.38908	4.26829	4.19261	4.07307	4.4486	4.49386	4.32724	4.33236	4.39711	4.59222	4.32714	4.12236	4.33241	4.21187	4.33516	3.47636	4.40133	4.04893	4.9024
ASF1A	11720789_at	7.14334	5.55987	5.96398	5.39165	5.52608	6.39597	6.1897	5.59448	6.24143	6.44179	6.05084	6.3045	6.58094	6.23008	5.83269	6.04721	5.74718	5.98698	5.50253	6.59408	6.18714	6.18225	6.15703	5.98942	6.14832	6.16943	5.30131	6.64871	5.98363	6.32318	5.76649	6.37069	5.56934	6.49355	6.13435	6.13063	6.2751	6.60111	6.85445	5.42999
ASF1B	11751629_a_at	4.51287	3.89973	4.94393	4.66723	4.56344	6.59871	4.34068	4.85395	5.11702	3.9806	5.46938	4.34887	4.53922	4.91405	5.19296	4.97878	5.01933	4.64926	4.83674	4.64926	5.11095	5.18479	5.0925	4.78256	5.04401	5.12999	4.93604	4.81811	5.33565	5.19527	4.94636	4.84142	5.29951	4.76857	4.88147	4.85445	4.62906	5.2194	4.51461	4.64433
ASGR1	11745554_a_at	5.67552	6.60947	6.66972	6.77873	7.12752	6.04538	6.61904	6.27048	6.64045	7.0425	6.91946	6.10419	6.77419	6.66432	6.65762	6.532	6.72223	6.4536	6.75384	6.57053	6.50407	6.49987	6.87177	6.84502	6.33838	6.48225	6.89384	6.20517	6.74746	6.60028	6.62376	6.60271	7.14617	6.57859	6.0066	6.91464	7.02965	7.1511	6.07258	6.74908
ASGR2	11750052_a_at	5.06635	5.7441	5.43815	5.84311	5.55191	5.13494	5.63962	5.14956	5.53908	5.75537	5.42888	5.12501	5.51613	5.3796	5.86887	5.35354	5.87041	5.38205	5.81092	5.31342	4.91998	5.26425	5.50929	5.50816	5.20904	5.51258	5.58992	5.0667	5.72659	5.73196	5.51461	5.51461	5.80142	5.58389	5.50934	5.73196	5.9644	5.47412	5.17427	5.6002
ASH1L	11750039_a_at	4.30197	4.18811	4.32303	3.93818	4.21168	4.0407	3.65916	4.46369	4.13262	4.41305	4.45021	4.56909	4.50287	4.27523	4.30626	4.4821	4.29681	4.43339	4.43434	4.54469	3.86058	4.48337	4.31277	4.22097	4.32088	4.31236	4.32564	4.54029	4.36758	4.52491	4.19189	4.46643	4.29798	4.05454	4.45521	4.25559	4.68219	4.05187	4.33934	4.03098
ASH2L	11739013_s_at	7.95939	7.73481	7.95411	8.25423	7.98792	8.10361	8.15415	7.66437	7.99178	7.88923	7.92003	7.74847	7.7949	7.62924	7.89629	7.60563	7.43574	7.74486	7.62914	7.55509	7.98908	7.68401	7.76817	7.73989	7.78004	7.58036	7.71832	7.66112	7.70073	7.53818	7.68119	7.78937	7.63634	7.62339	7.93476	7.69082	8.01772	7.67087	7.72536	7.44621
ASIC1	11746958_s_at	2.91028	3.54921	3.07153	3.64393	3.5516	2.83275	3.47842	3.22651	3.1671	2.89967	2.826	3.02077	2.57446	2.95927	3.3452	3.1251	3.16045	3.12531	3.24383	2.98157	2.7057	3.25971	3.18523	2.91913	3.05577	3.02939	3.43339	2.96087	2.99337	3.4183	3.4137	3.04457	3.53339	3.07196	2.81068	3.15243	3.09225	3.10882	2.9452	3.51947
ASIC2	11729524_a_at	2.55288	2.8454	2.68991	2.78416	2.55791	2.78855	3.17648	2.71519	2.59457	2.56658	2.65351	2.41654	2.39649	2.66669	2.8782	2.60634	2.77137	2.57981	2.53868	2.75993	2.59398	2.70388	2.46165	2.64207	2.63168	2.65708	2.86556	2.39397	2.4281	2.77279	2.66588	2.68589	2.68402	2.4472	2.59585	2.71084	2.47843	2.473	2.54469	2.75755
ASIC4	11761873_x_at	3.05363	4.18335	4.32416	4.13061	4.48198	3.65572	4.53245	3.0969	4.19652	3.91909	3.64524	2.96704	3.36357	3.87736	3.91093	3.4257	4.32576	3.71511	4.07584	3.99805	3.14685	3.83575	3.68128	3.7515	3.69981	3.88008	3.92277	3.56214	3.79444	3.37303	3.71184	3.51258	3.93951	3.67659	3.50133	3.64592	3.67803	3.54909	3.7942	4.12114
ASIC5	11742277_at	2.53724	2.83234	2.49364	3.0486	3.28317	2.67452	2.69762	2.66671	3.00615	2.56866	2.63205	2.37089	2.26224	3.02858	2.6882	2.89276	2.94708	2.86803	3.03347	2.76631	2.58364	2.97156	2.74256	2.59703	2.54977	2.75068	2.99739	2.7083	2.55175	2.54417	2.61236	2.39438	2.60905	2.7404	2.74869	2.53439	2.32758	2.75196	2.68672	2.96328
ASIP	11715281_at	3.96146	4.60573	4.52514	4.72363	4.95222	4.38364	5.15884	4.4277	4.79981	4.45899	4.30402	4.22401	3.88692	4.25928	4.36197	4.24508	4.84971	4.43478	4.43002	4.65025	4.35783	4.3495	4.06204	4.17104	4.18518	4.41081	4.3578	3.98252	4.14465	4.44186	4.30402	4.17197	4.2189	4.28586	4.09593	4.08736	4.06768	4.13924	3.99306	4.5679
ASL	11760562_at	3.41104	4.22654	4.0918	4.58489	4.29501	4.19733	4.46122	3.81822	3.9877	3.67514	3.28831	3.45355	2.72264	3.60515	3.48157	3.59493	3.99323	3.71803	3.94322	3.67968	3.15561	3.68997	3.59054	3.47281	3.45521	3.49416	3.81522	3.12034	3.63829	3.56023	3.5358	3.51258	3.70626	3.96171	3.29265	3.78386	3.24868	3.57098	3.51026	4.18762
ASMT	11738886_a_at	2.49117	3.3908	2.91925	3.04122	3.23998	2.58129	3.79427	2.80008	2.9235	2.70066	2.53793	2.40284	2.74496	2.69142	2.66253	2.9164	3.07316	2.66019	3.08799	2.82301	2.54812	2.69947	2.75581	2.71361	2.77381	2.77527	2.85676	2.56066	2.65414	2.63748	2.65261	2.72918	3.00746	2.80717	2.54179	2.62286	2.54179	2.79521	2.63404	2.88404
ASMTL	11719797_a_at	8.78923	7.22808	7.00866	6.93044	7.16305	8.06986	7.13842	7.36794	6.85457	7.04297	7.43747	7.82027	7.46502	7.31646	7.96455	7.65353	7.44278	7.35869	7.48339	7.47917	7.44755	7.51154	7.52058	7.52015	7.79404	7.53635	7.61649	7.51378	7.55882	7.45748	7.68082	7.41076	7.07476	7.50309	7.18433	7.32557	6.44871	7.52205	7.57815	7.55766
ASNA1	11749739_a_at	6.72995	7.36273	8.70224	7.75857	7.81164	7.4474	8.37202	7.36778	7.8026	7.17983	7.22448	7.15935	7.20862	6.82622	6.87032	6.45188	6.96291	6.88028	7.08085	6.88454	6.34707	6.74417	6.81525	6.45606	7.36418	7.09812	6.9566	6.83994	6.68587	6.85703	6.98526	7.01832	6.70702	6.74086	6.87392	6.82432	6.97825	6.91016	6.78625	6.86977
ASNS	11716364_s_at	4.33043	5.65167	6.06353	5.30727	5.29013	6.90986	5.94992	6.04341	6.40622	5.71144	6.9121	6.70123	7.10465	5.95122	6.10013	6.79013	5.94708	5.73551	5.96953	6.48795	6.41697	6.49915	5.68001	5.82507	6.00761	5.93624	5.95959	6.2751	6.23485	6.24022	5.53195	6.20889	5.11328	5.92442	6.10556	5.64521	6.06329	5.14741	7.03208	5.28661
ASNSD1	11742855_at	6.41935	5.72591	5.95967	5.44497	6.02647	6.39307	6.09793	5.96585	6.30506	6.54819	5.925	5.52533	6.83682	6.35702	5.47409	5.45048	5.68197	6.13757	5.0343	6.03925	6.05959	6.10679	6.31674	6.2985	5.79735	6.02563	5.64156	6.5452	5.83909	6.10021	5.93191	6.11364	6.43839	5.84579	6.79263	5.83271	6.22543	6.2493	6.30098	5.11006
ASPA	11726405_a_at	3.61887	4.69405	4.51959	4.3203	4.15151	3.78646	4.80316	4.06248	4.23825	4.0248	3.73693	4.07545	3.13806	4.08655	3.8292	4.18801	4.43374	4.21558	4.60755	3.9208	3.84814	3.9922	4.18198	3.98163	4.04702	4.02219	3.88916	4.01145	4.08291	4.03903	3.96031	3.88653	4.01338	4.37703	3.97119	3.97497	3.69748	3.84633	3.9792	4.16402
ASPDH	11734505_a_at	5.8416	6.80815	6.25729	6.78268	7.06603	6.15876	6.80789	5.76145	6.57395	5.9742	6.16382	5.75638	5.47297	6.29354	6.21883	6.10423	6.72123	6.11801	6.54835	6.06753	5.52744	6.17507	6.07518	6.02221	6.05385	6.27011	6.34289	6.03816	6.02549	5.99542	6.14201	6.13072	6.14981	6.16968	5.67482	6.00457	5.53069	5.88162	5.64647	6.51716
ASPG	11740552_at	3.77014	4.66301	4.51974	4.49	4.88469	4.43422	5.28025	3.56898	3.86307	3.79446	3.63973	4.03319	3.58369	4.22864	4.13478	3.99741	4.74069	4.05321	4.43814	3.96384	3.35794	4.27916	3.98368	4.02969	3.70137	4.00792	4.08889	3.46696	4.057	4.05254	4.01014	3.94159	3.77045	4.09987	3.49152	4.30779	3.79987	3.94201	3.87931	4.44547
ASPH	11761139_at	2.34621	2.52257	2.26755	2.81635	2.57867	2.28554	2.75098	2.67313	2.25803	2.22144	2.2391	2.2355	2.17673	2.43715	2.24535	2.25953	2.74164	2.63462	2.78716	2.49914	2.08176	2.34203	2.54179	2.28662	2.40952	2.85796	2.53898	2.40345	2.27694	2.32849	2.49507	2.27739	2.55256	2.34203	1.90916	2.31644	2.31621	2.5574	2.16899	1.95531
ASPHD1	11746932_a_at	3.48567	4.33	4.10145	4.5157	4.05524	3.69471	4.91867	3.57844	4.28121	3.31123	3.64626	3.21842	2.86919	3.80143	3.69887	3.45446	4.43097	3.81692	4.39562	3.45867	3.74047	3.63048	3.49105	3.3227	3.5825	4.06271	3.72753	3.38701	3.38781	3.48163	3.77957	3.80057	3.61806	3.83992	3.01518	3.67238	2.98633	3.57005	3.30044	3.65901
ASPHD2	11724391_at	6.07956	4.81963	4.98138	4.88586	5.07476	4.74785	5.45616	6.09299	4.85644	5.53905	5.22739	5.35778	5.26708	5.4622	5.38775	5.30856	5.25797	5.26204	4.93885	5.18759	5.4455	5.56432	5.58495	5.30029	5.75579	5.31578	4.73984	5.26877	5.33896	5.26983	5.45225	5.3434	5.20137	5.10292	5.14664	5.5766	6.25729	5.39696	5.3111	5.61538
ASPM	11742832_a_at	3.71235	2.44169	2.92703	2.89688	2.61625	4.02456	4.07526	2.96262	2.57828	2.69496	3.21554	2.99155	2.49339	3.05408	2.18491	2.42419	2.6363	2.60013	2.67337	2.73454	2.69024	2.78964	2.53712	2.42838	4.07728	2.81108	2.66769	2.44613	2.63519	2.5246	3.01726	3.59958	2.49007	2.65869	2.84884	2.95251	3.537	3.41129	2.30941	3.01205
ASPN	11719806_a_at	1.60879	1.74298	1.99919	1.81282	2.05442	1.80885	1.91141	1.92229	1.77257	1.93823	1.88151	2.05272	1.93094	1.78684	1.96545	1.73455	1.71002	1.93722	1.76703	1.79745	1.87226	1.9193	1.73444	1.96384	1.79335	2.23126	1.77389	1.8292	1.82777	1.68976	1.91113	1.77389	1.93382	1.81225	1.76228	1.77116	1.6732	1.82155	1.81436	1.92979
ASPRV1	11724598_at	6.22658	6.60947	6.62916	6.95899	6.86317	5.69642	6.57013	7.19086	5.85199	6.32933	6.69608	6.76353	6.47916	6.79343	6.94279	7.46432	6.70457	6.59338	7.16365	6.51003	7.30931	7.03623	7.14874	6.82754	6.69852	6.80839	7.80675	6.33871	7.4678	7.02688	6.48736	6.61647	7.33836	6.90617	7.53695	6.78326	7.39987	6.57659	6.61088	7.03698
ASPSCR1	11748963_x_at	6.4917	6.8761	6.34503	6.52465	6.65274	6.7797	6.56761	6.15914	6.76163	6.34244	6.18128	6.75822	6.27743	6.13193	6.25475	6.35322	6.35706	6.29687	6.59037	6.23966	5.72435	6.30219	6.37581	6.20741	6.57785	6.42271	6.24472	6.2751	6.1548	6.37008	6.50843	6.32546	6.35764	6.35104	6.01402	6.34357	6.29039	6.24324	6.4898	6.59425
ASRGL1	11761285_a_at	3.33193	3.97555	3.76391	3.94368	3.70588	3.12378	4.23959	3.70372	3.87328	3.18376	3.38106	3.3587	3.23997	3.47298	3.44641	3.53848	3.99387	3.33889	3.8697	3.54331	3.43154	3.37373	3.38768	3.5488	3.32546	3.44266	3.56496	3.62515	3.39192	3.86261	3.42123	3.47965	3.74315	3.39826	3.32203	3.32608	3.16402	3.4518	3.21197	3.73857
ASS1	11758627_s_at	5.71507	3.98284	3.92144	4.23672	4.25429	8.018	4.03795	4.19096	3.69659	4.1163	4.38736	4.62789	4.31468	4.1521	4.17472	4.1726	3.45199	4.08145	4.15414	4.01807	3.61129	4.64901	3.64563	3.97005	4.16762	4.2526	4.47947	5.17288	4.33755	3.85729	3.8517	4.20915	3.71325	4.00201	4.21884	3.89054	3.91513	4.6052	4.64776	4.33041
ASTE1	11725577_a_at	5.6823	5.77169	5.60724	5.60946	5.91136	5.587	5.07686	5.8197	5.82674	6.40335	5.86035	6.31076	6.1877	6.06706	6.18217	6.11757	5.54093	6.08806	6.06491	6.28121	6.1476	6.3052	6.07036	6.14203	6.20285	5.97286	6.10102	6.38577	6.0307	6.17868	6.17374	6.29289	5.94193	6.1917	6.14641	5.73773	6.12091	6.00444	6.52801	5.87576
ASTL	11738566_at	3.47601	3.93801	3.95146	4.06207	3.99518	3.73192	4.38434	3.70856	3.83725	3.70271	3.68795	3.68102	3.5105	3.45356	3.8545	3.78413	4.18498	3.67446	4.10313	3.77848	3.60518	3.8659	3.85201	3.63045	3.73555	3.66744	3.8197	3.68712	3.63423	3.7558	4.09398	3.67808	3.62926	3.85155	3.71019	3.74526	3.29951	3.54404	3.32243	4.12936
ASTN1	11720142_at	2.67341	3.92782	3.45225	3.83312	3.76337	3.32717	3.91408	3.36208	3.71748	3.1738	3.27082	3.40066	2.8316	3.46618	3.50908	3.44313	3.57127	3.4509	3.62494	3.53075	3.32037	3.31097	3.72525	3.40984	3.39386	3.63285	3.63267	3.11883	3.2845	3.33227	3.59143	2.95548	3.50397	3.28687	3.0565	3.3699	3.05299	3.11694	3.23232	3.65319
ASTN2	11724347_a_at	2.42444	3.30784	3.27557	3.08356	2.89491	2.78631	2.98549	3.17966	3.89747	3.22224	3.27566	2.87815	2.97214	2.56734	3.09417	2.87971	2.94371	2.80635	2.92949	2.89484	2.75775	3.064	2.87521	2.58805	2.84621	2.9926	3.04277	2.5603	2.71095	2.70411	3.03409	2.85711	2.56063	3.04997	2.91389	2.69114	2.82928	2.64308	3.03873	2.85276
ASXL1	11759778_at	3.42144	4.80296	5.18623	4.7981	5.68735	4.13217	6.35526	3.47917	5.07899	4.34119	3.84756	3.28091	3.50694	3.253	3.95856	3.50055	4.13732	4.09672	4.04274	3.94793	3.35004	4.05046	3.68316	3.55189	4.00403	3.28252	3.492	3.55009	3.92446	3.64841	3.74494	4.19645	3.42516	4.07013	3.23776	3.7765	4.07839	3.67414	3.87611	3.64198
ASXL2	11726047_a_at	2.21347	2.77402	2.94735	2.99271	3.06236	2.66808	2.58844	2.53911	2.5822	2.61297	2.38496	2.47376	2.20713	2.45309	2.32634	2.62621	2.96999	2.58446	2.59164	2.529	2.79673	2.56671	2.33058	2.47434	2.53724	2.52521	2.87826	2.56126	2.65188	2.59135	2.61517	2.72777	2.65321	2.37653	2.73399	2.65584	2.5971	2.53724	2.44022	3.22548
ASXL3	11737081_at	2.30006	2.6866	2.10735	2.2914	2.45757	2.5266	2.75967	2.34515	2.78502	2.13302	2.24596	2.17688	2.14424	2.31786	2.83019	2.38267	2.58296	2.44288	2.34039	2.18683	2.16788	2.44874	2.42165	2.40064	2.46594	2.4402	2.86556	2.35096	2.42769	2.4219	2.49223	2.42386	2.52086	2.93449	2.47347	2.49435	2.01042	2.54858	2.32421	2.25553
ASZ1	11750332_a_at	1.794	1.84231	1.91462	2.1936	2.11137	1.78256	1.99612	1.64776	2.15263	1.52553	1.96118	1.95397	1.87323	2.03875	1.89036	1.78276	1.9042	1.73136	1.92683	1.75582	1.96118	1.91037	1.75273	1.77742	1.79123	1.94226	1.94582	1.77933	2.00163	1.83235	1.59647	1.74386	2.0798	1.88069	1.8297	1.75264	1.90135	2.04872	1.67621	1.87395
ATAD1	11729305_a_at	5.84985	4.00871	4.73166	4.59326	4.2319	5.23538	4.30713	4.41441	5.16453	5.67414	5.24795	4.83511	5.49842	5.11625	4.34053	4.38562	4.53632	5.04276	4.29829	5.35532	5.06047	5.09997	4.78749	4.82271	4.85259	4.86258	3.73212	5.26293	4.97678	4.95544	4.86029	5.42065	4.76311	4.90088	5.69937	5.30836	5.75922	5.1593	5.61435	4.38349
ATAD2	11725722_at	5.01428	3.36469	3.59845	3.74986	3.38553	6.2275	3.37667	3.7855	3.93308	4.65021	4.09088	4.31818	4.63085	3.94094	3.74012	3.768	3.13314	4.07108	3.39008	4.21439	4.38043	4.08799	3.89889	4.03929	4.60592	3.67131	2.96471	4.31818	3.86923	4.03346	3.96988	4.79554	3.84761	4.41957	4.22446	4.28851	4.55339	4.31658	4.74274	3.52781
ATAD2B	11726882_at	6.31893	3.33612	4.09037	3.77572	3.39653	5.55575	3.34809	4.94118	4.55612	5.81949	5.0677	4.79621	6.48058	4.97685	4.63686	4.43786	3.54508	5.07155	4.42053	5.54445	6.03897	4.7497	5.02258	5.45985	5.51689	4.44911	4.24437	5.4675	4.76316	5.27334	4.37208	5.68136	5.88396	5.25825	5.56091	5.58634	6.45607	5.75334	5.92218	4.48642
ATAD3A	11744160_x_at	6.07724	7.07276	6.5373	6.97774	7.32378	6.7905	7.16114	6.47536	6.74042	6.12805	6.31743	6.40899	5.88101	6.627	6.42693	6.48519	7.15351	6.51455	6.89597	6.25453	6.00298	6.46262	6.08333	5.95585	6.27556	6.59425	6.62344	6.2219	6.33373	6.35353	6.9012	6.35708	6.07828	6.61014	5.70488	6.35444	5.79083	6.12467	6.14177	6.42412
ATAD3B	11721768_x_at	5.48985	6.76233	6.41905	6.91169	6.72839	6.15935	7.09155	5.69981	6.0548	5.72231	5.96323	5.77916	5.51544	6.15534	6.2025	6.03166	6.44915	6.06151	6.40835	5.73307	5.44612	5.90338	5.79143	5.89513	5.83999	5.87073	6.059	5.86695	6.06067	5.96761	6.2579	5.98148	5.91875	6.23049	5.4415	6.27661	5.97239	6.01696	5.93698	6.48121
ATAD3C	11739873_s_at	3.89261	5.04475	4.80364	5.20421	5.14948	4.45979	5.33152	4.13012	4.45206	4.23173	4.14735	3.94338	3.99618	4.35779	4.54771	4.41238	5.00635	4.43274	4.63957	4.17721	3.90449	4.35046	4.28859	4.28318	4.17721	4.32149	4.56949	4.21547	4.70642	4.42306	4.4021	4.35297	4.31013	4.39215	4.21571	4.57523	3.9846	4.45854	4.17767	4.81734
ATAD5	11736919_at	3.96606	3.42946	3.22385	3.53476	3.38559	4.86817	3.70134	3.48643	3.35638	3.59215	3.41484	3.0969	3.34018	3.50379	3.25947	3.3437	3.25334	3.24932	2.76989	3.58619	3.27476	3.72276	3.29037	3.08772	3.35189	3.33849	3.31769	3.46367	3.47222	3.24266	3.50753	3.60539	3.11852	3.33052	3.07685	3.50041	3.66622	3.6493	3.5554	3.27615
ATAT1	11725318_a_at	3.19424	3.40518	3.24466	3.31888	3.27799	2.82718	3.68334	2.86571	3.36447	2.65262	2.62275	2.88642	2.80892	2.98722	2.92387	2.88155	3.27001	2.8895	3.1425	2.77516	3.04546	3.42846	2.88155	2.97508	2.83164	3.08091	3.08091	2.66442	2.75324	3.1234	2.88324	2.97541	2.90997	3.19972	2.75876	2.86792	2.80378	2.93273	2.9636	2.994
ATCAY	11748191_a_at	1.91542	2.4521	2.79113	2.2988	2.77179	2.25417	2.80329	2.71844	2.39207	2.12249	2.08015	1.88713	2.14631	2.37389	2.16495	2.35687	2.3284	1.9473	2.2092	1.93555	1.87996	2.03982	2.15576	2.11225	2.16556	2.12037	2.159	2.12082	2.07362	2.21098	2.35872	2.12571	2.10594	2.19819	1.91099	2.18934	2.01968	2.1537	2.11907	2.58145
ATE1	11739391_a_at	4.63023	4.16594	4.54884	4.24172	3.70588	4.07303	4.48803	3.46628	3.93254	4.01473	4.192	3.83689	3.5997	4.00074	4.08649	3.9315	4.22804	3.86531	4.11928	3.82273	4.07447	3.81092	3.84197	4.19261	3.90472	4.02131	3.9133	4.19105	4.01249	4.19721	3.93289	3.94235	4.41399	4.30922	4.00906	4.06455	3.75615	3.95587	3.85687	4.04168
ATF1	11743163_at	6.06715	3.67395	4.72247	4.15526	4.22284	5.47359	4.00903	4.43597	5.06823	5.5819	5.40557	5.12377	6.26685	5.46597	4.44758	4.88128	4.41588	5.1052	4.63731	5.54528	6.13525	5.28744	5.29494	5.20586	5.55664	4.9538	4.3949	5.35221	5.19785	5.4759	4.75348	5.43826	5.6321	5.21434	5.3787	5.33038	5.90306	5.86345	5.85018	4.02707
ATF2	11761942_at	2.3133	2.12502	2.2294	2.28558	2.33442	2.25117	2.19863	2.73355	2.287	1.9794	2.17615	2.25369	2.49557	2.13484	2.25525	2.2378	2.26769	2.43394	2.09625	2.25216	2.26831	2.19497	2.13602	2.53116	2.55063	2.38286	1.94261	2.33124	2.36652	2.29243	2.27445	2.25152	2.27908	2.15755	2.2863	2.25722	2.28835	2.27908	2.52914	2.25553
ATF3	11763463_a_at	2.35402	2.67481	2.49296	2.56582	2.61946	2.37609	2.53984	2.42707	2.81411	2.29854	2.33339	2.42857	2.70099	2.32148	2.39918	2.52054	2.68358	2.38517	2.73319	2.4235	2.56227	2.48226	2.17832	2.36472	2.3113	2.22144	2.52353	2.39407	2.41006	2.5275	2.25642	2.37492	2.46846	2.45577	2.50949	2.36385	2.12207	2.53386	2.219	2.14513
ATF4	11757047_x_at	11.3935	8.89749	10.2889	9.60057	9.06009	10.6607	9.54785	10.025	9.61416	10.1387	10.0041	10.3552	10.2737	9.4206	9.70995	9.53093	9.11945	9.65642	9.09802	9.81298	9.81818	9.53482	9.66825	9.68543	9.82694	9.49737	9.53544	9.88477	9.592	9.83703	9.74917	9.94349	9.70402	9.76559	10.1882	9.57418	10.6461	10.1162	10.3406	9.44612
ATF5	11754592_x_at	3.53382	4.16958	4.0799	4.44615	4.04194	7.72823	4.58535	3.90488	4.0643	4.23729	4.03267	3.78366	3.35829	4.09462	3.99611	3.61383	4.26758	4.04624	4.18731	3.83397	3.99247	3.57658	4.22444	3.55908	4.27278	3.9088	3.79828	3.20593	3.94322	3.53376	4.13007	3.97327	3.84761	3.80759	3.27112	4.00785	4.42407	3.78226	3.94218	4.00011
ATF6	11745174_a_at	5.18569	5.40087	5.58213	4.71082	4.60459	4.98877	4.61491	5.8447	4.93675	5.54858	5.91507	5.46596	5.5287	5.4251	5.29401	5.68119	4.39033	5.70134	5.54809	5.40711	5.00361	5.54763	5.59505	5.63363	5.41472	5.31912	6.43157	5.34268	5.72217	5.39609	5.29354	5.28016	5.74571	4.54777	6.68391	5.57226	5.54251	4.989	5.09067	4.77848
ATF6B	11720962_x_at	6.16536	6.57796	6.32904	6.50055	6.51484	6.10703	6.72518	6.48297	6.92253	5.63643	6.4127	6.44417	6.88707	6.35614	6.29615	6.40818	6.6471	6.18191	6.58125	6.5786	5.80612	6.40597	6.13212	6.42234	6.33617	6.40975	6.63131	6.27167	6.58004	6.40341	6.45671	6.43781	6.45407	6.61456	6.37705	6.65629	6.38662	6.25579	6.40915	6.62346
ATF7	11759607_a_at	5.27435	4.03128	4.20982	3.56495	4.20506	3.50809	4.40737	4.01181	5.11751	5.17205	4.57277	3.87552	4.58623	4.11867	3.57502	3.89169	3.62844	3.71495	3.68467	4.02474	3.92444	3.68899	4.60934	4.05894	4.29484	3.87514	4.03476	3.88546	4.06395	3.74525	3.93302	4.50233	4.05306	4.21739	4.74863	4.45927	4.13879	4.54889	4.01624	3.8275
ATF7IP	11759899_at	2.41617	2.29584	2.01654	1.84882	2.06631	2.60993	2.22349	2.60424	1.61006	2.19706	2.23296	2.81105	2.40107	2.15961	2.2877	2.13994	2.76748	2.60697	2.29574	2.45418	2.47887	2.58549	2.39917	2.4679	2.3771	2.5082	2.52111	2.227	2.87777	2.68592	2.25298	2.38207	2.39917	2.83114	2.43506	2.74876	2.38387	2.43693	2.7551	2.17705
ATF7IP2	11754787_a_at	2.23892	2.47423	2.18843	2.16036	2.41544	2.02696	2.37513	2.40679	2.46426	1.89997	2.18625	2.33838	2.20742	2.02527	2.15572	2.20383	2.15061	2.1798	2.26789	2.1825	2.18524	2.13873	2.17673	2.03408	2.10235	2.23746	2.41578	2.23002	2.27545	2.14725	1.95953	2.49758	2.11314	2.56834	2.14281	2.0569	2.09074	2.14169	2.27006	2.21959
ATG10	11734244_a_at	3.11214	2.48716	2.69246	2.63295	3.17779	2.8363	3.02968	2.33446	2.39063	2.59325	2.69771	2.36283	2.91883	2.58726	2.54776	2.6561	2.97585	2.70616	2.66915	2.54397	2.54987	2.77245	2.88095	2.68643	2.50575	2.70944	2.62475	2.46908	2.42944	2.71069	2.73696	2.71519	2.52254	2.67324	2.62326	2.68108	2.60715	2.81289	2.62054	2.55184
ATG101	11726275_a_at	7.74983	7.03099	7.21589	7.01346	6.95458	8.16437	6.97825	7.2422	6.90893	7.01441	7.24938	7.31906	7.23084	6.88155	7.277	7.07311	7.24628	7.08888	7.02192	7.0557	6.86565	7.23305	7.1891	7.05372	7.33506	7.1523	7.13126	7.14817	7.10256	7.20682	7.62155	7.17855	6.90563	7.27802	6.99784	7.14393	7.2939	7.15059	7.0536	7.07969
ATG12	11739321_a_at	5.04464	6.38054	6.01491	6.23233	6.5176	5.65517	6.49485	5.56433	6.27028	5.48316	5.42717	5.2854	5.35325	5.73607	5.82776	5.70952	6.33941	6.01892	6.13587	5.53871	5.36889	5.75651	5.6864	5.59982	5.52808	5.87394	5.80444	5.67624	5.6971	5.78278	6.26114	5.63223	5.61843	5.58276	5.3746	5.71791	5.47978	5.5011	5.2945	6.07086
ATG13	11734805_a_at	5.86848	6.29572	6.81347	5.93851	6.0719	6.02705	6.69829	6.15096	6.26462	5.86469	6.36841	6.16153	6.02504	5.99612	6.06631	5.99563	5.82968	6.05066	6.16915	5.81493	5.03193	5.85973	5.97746	5.74975	6.33256	5.97845	6.14535	5.80577	6.0722	6.02935	6.02627	5.64058	5.97023	5.71999	5.8702	5.58735	6.01672	5.6773	5.71999	5.87713
ATG14	11725490_s_at	3.47601	4.93661	4.49602	4.62792	4.25042	3.96935	5.66377	4.00792	4.54967	4.35922	3.67704	3.43716	4.08589	4.00857	4.25299	4.04917	4.51529	4.33984	4.18712	3.74201	3.36836	3.94713	3.99902	4.23358	3.88692	3.75718	4.26954	4.11812	4.09119	4.02219	4.53033	4.10577	4.05687	3.9507	3.72887	4.48857	4.15174	3.984	3.96253	4.4364
ATG16L1	11724681_a_at	4.46178	4.2775	4.07778	4.1514	3.97047	4.43346	3.74681	4.08853	4.53074	4.72523	4.37146	4.59617	4.68818	4.3973	4.37016	4.62784	3.76632	4.35343	4.65618	4.77773	4.02403	4.62633	4.42063	4.17647	4.81001	4.70812	4.02969	4.80656	4.14465	4.43867	4.18947	4.71708	4.30543	4.2299	4.649	4.53895	4.94051	4.74903	5.10376	4.46498
ATG16L2	11762208_a_at	5.32286	6.10161	5.98208	6.34303	6.02055	5.44252	6.01369	5.7839	4.97881	5.55242	5.96394	5.60798	5.26517	6.08789	6.31309	6.02873	6.01111	5.78047	6.08331	5.98476	5.18859	6.10491	5.78321	5.85954	5.94991	5.81174	6.38066	6.14408	5.99735	6.17861	5.52167	5.9625	6.15324	5.56009	6.14454	5.97453	7.17343	5.79884	6.35489	5.92902
ATG2A	11750070_a_at	4.29479	5.97752	5.58044	5.91299	6.10138	5.28109	6.35026	4.89952	5.27169	4.95623	4.70324	5.13277	4.49713	5.14968	4.89936	5.13342	5.6985	5.17326	5.60798	4.91786	4.54487	5.11866	5.16769	5.15972	4.8224	5.37416	5.15869	4.60745	4.88345	4.98459	5.1065	4.86499	4.94093	5.24376	4.90881	5.27217	4.34975	4.80402	4.65648	5.35486
ATG2B	11752518_a_at	3.75351	4.56278	4.24225	4.12426	4.35881	4.51208	4.3709	3.73096	4.50417	3.78128	4.12983	3.78189	3.94283	4.12563	4.15883	4.07154	4.27961	3.93834	4.32553	4.08579	4.9543	4.07038	3.92318	3.93112	3.84612	4.10212	4.23091	4.13062	4.26119	4.21718	4.23204	3.96182	4.18338	4.31103	4.35964	4.08601	4.3291	4.044	4.19026	3.72078
ATG3	11759680_a_at	3.55852	2.98078	3.25826	2.93249	2.77131	2.5266	3.0131	3.0969	3.25976	3.77844	3.42064	3.33193	3.51494	3.21851	2.96966	3.06696	2.38574	2.74772	2.48264	2.8759	4.76166	2.88485	3.29328	3.3174	3.37934	2.80233	3.26045	3.23694	4.16834	3.29494	2.26378	3.48719	4.08909	2.63322	3.53107	3.58048	4.3285	3.38112	3.24393	2.465
ATG4A	11741683_a_at	5.28536	5.59734	5.57527	5.45815	5.442	5.35082	5.53306	5.53407	5.78245	5.43476	5.40937	5.38032	5.35267	5.40398	5.21831	5.07834	5.35708	5.30054	5.32359	5.5129	5.31038	5.3376	5.2611	5.37822	5.36878	5.27899	5.24489	5.51984	5.29795	5.20309	5.33851	5.44626	5.33084	5.30165	5.40978	5.1253	5.37882	5.56046	5.38217	5.2626
ATG4B	11734680_a_at	6.0649	5.77335	5.87575	5.88008	5.69365	5.89591	4.80691	6.14543	6.04745	5.52024	5.75727	6.03276	5.28038	5.78451	6.05014	6.4149	5.91833	5.89712	5.92011	5.96136	6.10189	6.04165	5.92226	5.84173	5.83803	5.49875	6.00723	5.85149	5.9543	5.80318	6.16223	5.90866	5.36633	6.20692	5.66541	5.72813	5.85588	5.73866	5.58836	5.88415
ATG4C	11726659_a_at	6.82092	3.73687	3.76098	3.21694	4.13478	5.5693	3.34759	4.80103	4.4288	6.16612	5.15422	4.82924	5.65155	5.29915	4.50716	4.72152	4.57108	5.10651	4.07668	5.27677	5.5485	5.27087	5.10285	5.2069	5.36177	5.06072	4.666	5.08326	4.95744	5.56412	4.80575	5.35575	5.51881	5.18014	5.22636	5.46828	5.85366	5.87477	5.81157	4.70312
ATG4D	11746220_x_at	4.46414	4.87158	5.09168	5.05702	4.88338	4.7942	5.8542	5.08791	4.6392	4.71525	4.56156	4.41254	4.5245	4.30026	4.16244	4.2722	4.63893	4.4889	4.95021	4.48938	3.84519	4.45904	4.57601	4.53558	4.40766	4.67559	4.50876	4.54487	4.41336	4.486	4.7157	4.36397	4.78357	4.30286	4.55334	4.54474	4.13225	4.3495	4.33096	4.83347
ATG5	11757828_s_at	5.46463	4.16631	4.2684	3.70861	4.23218	4.31481	3.68712	4.67997	4.35297	5.44588	4.65938	5.09384	5.29709	4.38004	4.4286	4.18584	4.14951	4.47763	4.05785	4.92131	4.70328	4.65404	4.70365	4.90388	5.13066	4.6464	4.3672	4.89633	4.41993	4.66154	4.36507	4.8494	4.67185	4.88699	5.12083	4.79505	5.21923	4.92327	5.3846	4.18191
ATG7	11740814_a_at	6.07926	4.5335	5.22193	5.03845	4.89885	4.74763	3.92315	5.68373	4.71336	5.88314	5.69132	5.37554	5.69875	5.31061	5.75871	5.73803	5.68961	5.23118	5.61118	5.38612	5.7956	5.36533	5.90012	5.74969	5.82893	5.50526	6.12059	5.21393	5.48186	5.53761	5.51835	5.70326	6.04491	5.09697	5.84537	5.94785	6.80383	5.88497	5.84196	5.24084
ATG9A	11737756_a_at	4.88407	6.29728	6.20775	5.78501	6.04039	5.59903	6.63142	5.43794	5.61884	5.09925	5.37254	5.02857	4.78423	5.44315	5.26994	5.16116	5.81605	5.50493	5.7764	5.20432	4.80235	5.42751	5.29101	5.11367	5.05756	5.47228	5.3888	5.19057	5.23108	5.33247	5.45862	5.24512	5.36479	5.3484	4.90471	5.43178	5.20897	5.18212	5.03029	5.28076
ATG9B	11752156_a_at	3.69816	5.03055	4.52311	5.1343	4.80286	3.98961	4.75921	4.06216	4.47941	4.36263	4.16944	4.23889	4.04964	4.32348	4.13799	4.07305	4.64913	4.17593	4.71572	4.0992	3.53748	4.18969	3.99905	4.02131	3.89888	4.26715	4.16732	3.97076	4.05231	4.19455	4.26753	4.10122	4.23686	4.14186	3.83172	3.86565	3.5827	3.84226	3.6612	4.46328
ATIC	11715755_a_at	7.79629	6.35483	6.33679	6.68306	6.55961	8.29094	6.59723	7.02093	6.55394	7.10385	7.41284	7.79033	7.66791	6.87308	7.22403	7.35599	6.73733	7.28962	6.68562	7.27561	7.34208	7.26382	7.32392	7.00006	7.37105	6.94026	6.90561	7.18008	7.16783	7.24678	7.47365	7.32762	6.64173	7.34237	7.16587	6.8153	7.46948	7.15175	7.80046	7.0434
ATL1	11739694_a_at	2.15205	1.79205	1.6362	1.97727	1.79237	2.01581	1.84914	2.08026	2.05393	1.97469	2.19323	2.08646	2.04183	1.75156	1.76373	2.06778	1.66976	2.00246	1.9969	2.18884	2.31626	2.094	1.93534	1.58237	2.06205	2.03365	2.2369	1.93937	2.01684	1.93708	1.92663	2.02204	2.11907	1.65778	1.9685	2.13211	1.80522	1.97969	1.93101	1.64077
ATL2	11751006_a_at	3.19108	2.89954	2.73574	2.77977	2.8495	3.06488	3.30813	2.44408	2.57564	2.69406	2.85257	2.66446	3.49169	2.6911	2.75052	2.69251	2.43008	2.73305	3.0094	2.95492	3.19347	2.75068	2.72314	2.80914	2.63206	2.77145	2.96605	3.08754	2.7984	2.53316	2.53258	2.89967	2.54094	2.94624	3.11246	2.67185	3.37752	3.07552	3.53529	2.49015
ATL3	11721843_a_at	5.6909	4.95555	5.44925	5.40601	4.99617	5.01474	5.08752	5.06618	4.77982	5.33131	5.31135	5.22701	5.11162	5.11144	5.20897	5.06831	5.04245	4.9938	5.28734	4.7425	5.60576	5.28661	5.28299	5.56681	5.24234	4.99869	5.78869	5.06676	5.44178	5.21368	5.12005	5.39305	5.67049	5.04845	5.41993	5.34272	5.24165	5.08146	5.24729	5.19686
ATM	11745546_a_at	2.56893	3.283	2.28307	2.77714	2.68972	2.9926	2.65598	3.5269	3.153	2.78622	3.32671	3.26134	3.231	2.90385	2.83825	3.71854	2.88116	3.33962	3.20089	3.21928	3.0756	3.44376	2.65725	2.96277	3.26317	3.11986	2.97845	3.43329	2.95766	3.38659	3.02597	3.38109	2.89286	3.10734	3.21939	3.08206	3.39462	2.78301	3.7727	3.17037
ATMIN	11756199_a_at	7.02401	5.85391	6.13433	5.62103	6.05025	6.6225	6.10403	6.54911	6.61979	6.62807	6.63074	7.08845	7.14638	6.59696	6.25045	6.75449	6.06868	6.59293	6.1437	6.65707	7.1863	6.806	6.64605	6.85044	7.06388	6.52662	5.97301	6.43912	6.55179	6.60902	6.89071	6.89159	6.30828	6.58034	6.56367	6.43954	6.96995	6.93376	7.0718	5.94825
ATN1	11716966_a_at	3.19108	4.12552	4.01617	3.72796	3.8827	3.53188	4.1151	3.12368	3.8327	3.3882	3.27381	3.62837	3.23243	3.45186	3.49458	3.60519	3.99565	3.99064	3.9958	3.45223	3.53735	3.57613	3.61734	3.55627	3.53282	3.45451	3.5304	3.51474	3.49152	3.48918	3.81216	3.49932	3.51132	3.75217	3.62602	3.48094	3.31121	3.27224	3.20372	3.97359
ATOH1	11738386_at	2.90809	3.92914	3.5972	4.08291	4.28188	3.20749	4.2447	3.32665	3.98566	3.11161	3.07729	3.15017	2.89299	3.36654	3.34808	3.30992	3.80101	3.06087	3.54679	3.3908	2.8112	3.23092	3.18217	3.10207	3.37179	3.60233	3.21789	3.35656	3.46317	3.37382	3.57819	3.02418	3.28805	3.50055	3.15003	3.41694	3.09847	3.17135	3.3136	3.64032
ATOH7	11735655_at	1.99775	1.82628	2.06345	1.95561	2.17937	1.86319	2.18173	1.67149	2.12557	1.84698	1.97553	1.98529	1.87944	1.91843	1.73823	1.78085	1.92252	1.89433	1.92026	1.9607	1.61072	1.82826	1.89349	1.82539	1.70663	2.15946	1.93831	1.92699	1.80719	1.83235	1.83769	1.71469	1.89633	2.07545	1.94407	1.89051	1.90135	1.75882	1.76765	1.95727
ATOH8	11725143_s_at	2.83685	3.54831	3.22251	3.81731	3.60187	3.18355	3.46252	3.20562	3.4809	3.22485	3.12633	3.57996	2.71019	3.14847	3.44355	3.52043	3.68281	3.30989	3.37709	2.95104	3.47561	3.11633	3.08933	3.34492	3.43054	3.35972	3.43397	3.28101	3.18267	3.20388	3.35387	3.24964	3.21765	3.18214	3.07044	3.47216	2.89464	2.75891	2.94016	3.21561
ATOX1	11753870_a_at	8.23445	7.37639	7.75762	7.31118	7.40226	7.31867	7.84537	8.08035	7.41042	8.09322	7.94974	7.85798	7.89459	7.70047	7.6604	7.2556	7.16575	7.39447	7.36173	7.82374	7.85797	7.40547	8.20405	7.73036	8.15972	7.57393	7.59258	7.52333	8.00826	7.60406	7.75829	7.60772	7.69417	7.78477	7.69551	8.22168	8.3415	8.06535	7.72533	7.51664
ATP10A	11740041_at	6.28478	5.20817	5.04365	4.83038	4.88722	4.53975	4.9263	4.96885	4.88673	4.2298	4.65503	5.34744	4.59634	4.63486	4.54622	5.00192	5.15563	4.94548	4.73184	4.65926	4.97335	4.54385	4.70734	4.68094	4.50668	4.70052	4.64538	4.49249	4.70734	4.52914	4.7035	4.91019	4.24423	4.77848	4.55232	5.00745	5.42765	4.43719	4.66301	4.52693
ATP10B	11763483_at	1.97426	2.18334	2.44838	2.5205	2.42147	2.18903	2.33687	2.0031	3.04546	2.12616	2.41275	2.39147	2.21293	2.40933	2.11705	2.31086	2.48583	2.20907	2.36984	2.03245	2.68544	2.19769	2.32396	2.24046	2.40241	2.42797	2.02745	2.28264	2.184	2.26671	2.49783	2.23708	2.54542	2.31932	2.04322	2.28441	2.09897	2.2734	1.85285	2.3798
ATP10D	11760344_at	2.61614	2.50908	2.28307	2.61294	2.19754	2.13285	2.84502	2.25123	2.5958	2.81055	2.39893	2.3713	2.75511	2.1979	2.70007	2.6864	2.82281	2.3853	2.83338	2.58034	1.82046	1.94342	2.41006	2.55672	2.24006	2.31506	2.43266	2.56373	2.64498	2.38741	2.58329	2.63034	2.48689	2.56066	2.38562	2.57617	2.57819	3.02685	2.58308	2.56515
ATP11A	11743743_a_at	5.06618	6.06451	5.94937	6.08504	5.96472	5.20983	5.85799	6.02014	5.97147	5.81162	5.9532	5.40932	5.68902	5.59539	5.75884	5.74191	6.09441	5.86649	5.93695	5.72598	4.98241	5.75884	5.65799	5.90763	5.74191	6.21141	6.17762	5.64163	5.9581	6.11588	5.66807	5.85251	5.82643	5.78898	6.36131	6.02272	5.78181	5.9829	5.43577	5.81071
ATP11B	11760466_at	4.71341	4.52253	4.45956	3.44821	3.5516	3.47125	3.50307	3.87471	3.84299	4.2826	4.28103	4.18799	3.85511	3.96912	3.89431	3.72236	3.04504	3.76825	3.83341	3.85269	4.56797	3.60829	3.44656	4.62482	4.22239	4.14595	3.57954	3.8395	3.58685	3.87361	3.67103	4.03665	4.6903	3.67659	5.14815	3.79764	4.49731	3.8038	3.72708	3.01673
ATP11C	11723847_a_at	6.86133	5.90497	6.17259	5.41208	5.53164	6.68889	5.40684	6.5166	6.44906	7.16354	7.07951	6.54279	7.40879	6.69234	6.05242	6.2549	5.90296	6.63247	5.92576	6.84818	6.8166	6.6774	6.58075	6.71294	6.9926	6.62863	6.32259	6.97556	6.44481	6.7461	6.2677	7.07725	6.82102	6.68125	7.09508	6.65457	7.12439	6.68063	7.3289	6.26893
ATP12A	11732468_at	3.50197	4.15662	4.06715	4.40498	4.08655	3.51688	4.32163	3.03851	3.96481	3.88099	3.19212	3.25058	3.08206	3.77164	3.62226	3.75284	4.20413	3.5792	4.06904	3.29919	3.52946	3.84391	3.26177	3.38364	3.62737	3.67018	3.45174	3.61488	3.37732	3.79214	3.81312	3.51916	3.70467	3.7052	3.30317	3.67968	3.27002	3.63014	3.43501	4.0923
ATP13A1	11755907_a_at	6.77388	7.0913	6.86057	7.08292	7.03287	7.02585	7.16662	7.21725	6.69771	6.77496	7.27868	7.53757	7.31333	6.98154	7.3448	7.25981	7.1626	6.96426	7.19463	7.16878	7.2847	7.12849	7.20474	6.95601	7.09413	6.91219	6.93727	7.05226	7.05959	7.05011	7.80781	7.28881	6.95208	7.31946	6.84596	7.2412	7.26137	7.14809	7.08728	7.24808
ATP13A2	11737163_a_at	5.53531	6.10625	6.15056	6.50484	6.63721	5.78565	6.47156	5.53703	6.09807	5.76666	5.53791	5.6935	5.22174	5.96832	6.17306	6.13849	6.25609	5.88421	6.3351	5.98687	5.50622	6.00214	5.88676	5.60722	5.93067	5.99661	6.17429	5.84336	5.92766	5.86834	6.19754	5.92186	5.95147	6.27575	5.61642	5.79365	5.59333	5.73437	5.66285	6.23369
ATP13A3	11720136_s_at	7.32931	6.87952	6.46739	5.60691	6.17786	7.16385	5.88376	6.44977	6.57307	7.25764	7.28604	6.94275	7.63522	7.0446	6.28885	6.55108	5.94709	7.05171	6.72667	6.99131	7.27523	6.83219	6.71711	7.07536	6.93816	6.81875	6.66729	6.9197	6.72804	7.06542	6.54551	6.88987	6.75551	6.77712	6.8627	6.93687	7.23528	7.10604	7.01544	5.9387
ATP13A4	11747022_a_at	2.57664	3.08782	2.90458	2.79524	3.18439	2.9307	3.30404	2.58746	2.7637	2.54704	2.50365	2.73962	2.31696	2.86624	2.75979	2.96001	3.12707	3.2239	2.92576	2.45455	2.30397	2.86694	2.64728	2.81943	2.8828	2.86418	2.66283	2.71568	2.87774	2.83792	2.55452	2.8506	3.00579	2.84182	2.38117	2.66622	2.78871	2.77556	2.36593	2.75136
ATP13A5	11715203_s_at	3.62708	3.96532	4.05781	3.74326	4.02239	3.67965	3.99112	3.40979	3.88474	3.42578	3.75931	3.64038	3.83118	3.79955	3.61949	3.94674	3.72176	3.69815	3.77312	3.48495	3.80996	3.51152	3.57979	3.60918	3.43647	3.70938	3.59035	3.32383	3.67003	3.69884	3.64473	3.68922	3.53037	3.68863	3.83548	3.78788	3.21107	3.68444	3.72328	3.98211
[truncated: 16,264 more rows]
