# Supplementary material for: Utilizing bioinformatics to identify biomarkers and analyze their expression in relation to immune cell ratios in femoral head necrosis
Source: Front Physiol. 2025 Apr 16;16:1373721. doi: 10.3389/fphys.2025.1373721 (PMC12040900; doi:10.3389/fphys.2025.1373721)
Supplement: Supplementary file 2 [file Table3.xlsx]

## Sheet: CIBERSORT-infor-sig
Cell type	Group	CTRL	CTRL	CTRL	CTRL	CTRL	CTRL	CTRL	CTRL	CTRL	CTRL	NFH	NFH	NFH	NFH	NFH	NFH	NFH	NFH	NFH	NFH	NFH	NFH	NFH	NFH	NFH	NFH	NFH	NFH	NFH	NFH	NFH	NFH	NFH	NFH	NFH	NFH	NFH	NFH	NFH	NFH
	pvalue	GSM3507251	GSM3507252	GSM3507253	GSM3507254	GSM3507255	GSM3507256	GSM3507257	GSM3507258	GSM3507259	GSM3507260	GSM3507261	GSM3507262	GSM3507263	GSM3507264	GSM3507265	GSM3507266	GSM3507267	GSM3507268	GSM3507269	GSM3507270	GSM3507271	GSM3507272	GSM3507273	GSM3507274	GSM3507275	GSM3507276	GSM3507277	GSM3507278	GSM3507279	GSM3507280	GSM3507281	GSM3507282	GSM3507283	GSM3507284	GSM3507285	GSM3507286	GSM3507287	GSM3507288	GSM3507289	GSM3507290
Neutrophil	0.00335574	0.155496	0.325249	0.418427	0.286821	0.209593	0.166338	0.164812	0.401374	0.248334	0.163948	0.401898	0.28035	0.220985	0.372748	0.526021	0.500589	0.296296	0.404715	0.460068	0.293807	0.50892	0.310646	0.435234	0.476208	0.253094	0.419032	0.453761	0.353074	0.521139	0.440585	0.28098	0.226661	0.489892	0.359618	0.523045	0.249644	0.392075	0.248594	0.357933	0.353571
Myeloid dendritic cell activated	0.0209087	0.0104521	0.0201428	0.0149483	0.0126994	0.00944235	0.014519	0.0337056	0.00315715	0.0132313	0.0121469	0.00435962	0.00205986	0.00704637	0.0119736	0.00588134	0.00543592	0.00697181	0.0136073	0.00957354	0.00271889	0.00621138	0.00246025	0.00887362	0.00338427	0.00901688	0.0112276	0.0119593	0.0133922	0.00923292	0.00306305	0.00898835	0.00538708	0.00927537	0.00921834	0.00211071	0.0118041	0.00746196	0.00294569	0.00104014	0.0116308
NK cell resting	0.0259054	0.135175	0.0668413	0.124748	0.0877848	0.0479308	0.12778	0.122215	0.0774068	0.0440237	0	0.0560516	0.131202	0.0531925	0.0832596	0.0768812	0.0621223	0.043734	0.0310811	0.0680344	0.0822871	0.0353483	0.0568336	0.0434383	0.0293034	0.00231499	0.0882073	0.0337408	0.0734283	0.0367663	0.0223329	0	0.0516842	0.0147187	0.0783246	0	0.0540692	0	0.0298198	0	0
Macrophage M1	0.0414264	0	0	0	0	0	0	0	0	0	0	0.00235739	0	0	0	0	0	0	0	0	0	0	0	0.000654518	0	0.000947	0	0	0	0	0	0	0.00126023	0	0	0	0.00512175	0.00298335	0	0	0
Mast cell resting	0.0291906	0.100857	0	0.0191752	0.00920397	0	0.00269722	0.0419839	0.0678523	0.064123	0	0	0	0	0.00432455	0	0	0	0.0044128	0	0.000171629	0	0	0	0.00228128	0	0	0	0	0.00859933	0	0	0.00708428	0.00256628	0	0	0	0	0	0	0
Macrophage M0	0.0323929	0.0241986	0.0478004	0	0.0381023	0	0.029762	0.017307	0.0312859	0.047696	0	0.0303858	0.00555778	0	0	0	0.0350816	0.00664499	0	0	0	0	0	0	0.0352888	0	0	0.01105	0	0.0252738	0	0	0.00985847	0.0210208	0	0.00707153	0	0	0.0414442	0.00912091	0.00668377
T cell CD8+	0.0200354	0.0443377	0.0809411	0.128987	0.132123	0.0990636	0.127158	0.198891	0.195991	0.2412	0.173527	0.0646105	0.144705	0.0488655	0.0955108	0.0210766	0.0544239	0.174094	0.152371	0.107283	0.0951535	0.027766	0.0526706	0.0533929	0.0436859	0.176171	0.0420941	0.0505063	0.15331	0.058707	0.0170745	0.140136	0.178658	0	0.113698	0.0500755	0.0651815	0.0515511	0.130364	0.119658	0.107075
Myeloid dendritic cell resting	0.325582	0	0	0	0	0	0	0	0	0	0	0	0	0	0	0	0	0	0	0	0	0	0	0	0	0	0	0.00225196	0	0	0	0	0	0	0	0	0	0	0	0	0
B cell plasma	0.339812	0.0313279	0.0101839	0.00623376	0.0052137	0.000791548	0.160599	0	0.0155926	0	0.0159072	0.0533549	0.0158729	0	0.0269353	0.00758473	0	0	0.00202214	0.00084199	0	0.000663545	0.00417648	0.00181704	0	0	0.00302469	0.000233422	0.000530567	0.0116823	0	0.0329174	0.00924423	0	0.00573245	0.0302553	0.0145684	0.0308306	0.0113271	0.000910941	0.00232902
B cell naive	0.343436	0	0	0	0	0	0.0320035	0	0	0	0	0	0	0	0	0	0	0	0	0	0	0	0	0	0	0	0	0	0	0	0	0	0	0	0	0	0	0	0	0	0
T cell gamma delta	0.447118	0.17748	0.137342	0.0978579	0.0610358	0.250367	0.0986902	0.123986	0.0375534	0.13955	0.242009	0.039462	0.0646385	0.208397	0.138376	0.0933227	0.0628074	0.119898	0.0742561	0.104128	0.117416	0.109558	0.161379	0.0632948	0.119537	0.234634	0.101158	0.0980866	0.11465	0.0926485	0.123511	0.285386	0.118046	0.0750483	0.0735263	0.143713	0.0811306	0.06259	0.135028	0.174857	0.135768
B cell memory	0.478325	0.0198232	0.0341077	0.048169	0.0369192	0.116213	0	0.0482035	0.0459428	0.0523291	0.0556701	0.0313556	0.0484009	0.0303468	0.0341235	0.014458	0.0230967	0.0656576	0.0425515	0.037952	0.0368648	0.0378393	0.0343139	0.0433658	0.00641336	0.0174794	0.0566789	0.0247143	0.0160631	0.0262792	0.0650656	0.0220914	0.0521421	0.0487645	0.0575289	0.0526624	0.0530808	0.0487439	0.0291692	0.0415705	0.0551035
NK cell activated	0.530238	0	0	0	0.0179376	0	0	0	0.0576571	0.0187779	0	0	0	0	0	0	0.014635	0	0.0239767	0	0	0	0.00711564	0	0	0.0191851	0.0244146	0.0120681	0	0	0	0	0	0	0	0	0.00771176	0.0453548	0	0.00838368	0
T cell CD4+ naive	0.532051	0.0492409	0.0342	0	0.106575	0.0452461	0.0709206	0.0635306	0.0607741	0	2.31e-05	0.0472271	0.0766107	0.0140499	0.00133152	0.0715752	0.0938921	0.0374785	0.0457684	0.00911766	0.0937831	0.0444116	0.103642	0.0570301	0.0683004	0.0136768	0.055081	0.0666343	0.0152179	0.0546335	0.0705354	0.0435999	0.0259361	0.0593693	0.0661151	0.0630138	0.0344911	0.0396069	0.00270465	0.0749909	0.0778216
Monocyte	0.561919	0.275541	0.230105	0.182624	0.258917	0.181063	0.12464	0.197777	0.105625	0.177027	0.356769	0.232845	0.146682	0.33339	0.204886	0.125574	0.111035	0.202896	0.147762	0.184622	0.165741	0.171406	0.207479	0.232111	0.175992	0.195674	0.169709	0.174728	0.141732	0.114341	0.208956	0.160025	0.234386	0.22818	0.208796	0.0983096	0.360125	0.271537	0.286816	0.121807	0.187627
Mast cell activated	0.575768	0	0.0197514	0	0	0	0	0	0	0	0.0181033	0.00368279	0.0152244	0.00834328	0	0.0192938	0.00449927	0.000359041	0	0.00345743	0.000537527	0.00651255	0.00546193	0.00192436	0	0	0	0.0323761	0	0	0.0160062	0	0	0	0	0	0.005338	0	0.0119928	0.0202967	0.00832327
T cell regulatory (Tregs)	0.770765	0	0	0	0.00311757	0.00777171	0.0142466	0.0553684	0.00434274	0.00837074	0	0.00814554	0.00334565	0	0	0.010353	0.0141779	0.00160078	0.0338241	0.00463338	0.014387	0	0.00477547	0	0.0024327	0	0.00503098	0	0.0119857	0.0111855	0.0102643	0	0.0263448	0.0180292	0.00586638	0	0.00219213	0.00447137	0	0.0225294	0.0141701
T cell CD4+ memory activated	0.864297	0.023681	0.0363561	0.0360973	0.0362235	0.0325179	0.0306461	0	0.0557064	0.0523875	0.0333573	0.0239501	0.0625817	0.0313239	0.0233482	0.0279784	0.0182043	0.0437543	0	0.00914384	0.0661979	0.048461	0.0398781	0.0534479	0.0371726	0.0510012	0.0195839	0.0278905	0.0496886	0.029511	0.0218609	0.0258767	0.0365594	0.0331362	0.018957	0.0297433	0.0472204	0.0427934	0.0694895	0.020342	0.0314272
Eosinophil	0.957586	0.0523903	0	0	0.00732529	0	0	0	0.000806267	0	0.0285389	0.000314186	0.00276755	0.044059	0.00318202	0	0	0.000615877	0.0236513	0.00114458	0.0309342	0.00290217	0.00916868	0.00541485	0	0.0276575	0.0047582	0	0.0569278	0	0.000744245	0	0.0167475	0	0.00261884	0	0.00832087	0	0.000305726	0.0265603	0.00846921
