# Supplementary material for: Utilizing bioinformatics to identify biomarkers and analyze their expression in relation to immune cell ratios in femoral head necrosis
Source: Front Physiol. 2025 Apr 16;16:1373721. doi: 10.3389/fphys.2025.1373721 (PMC12040900; doi:10.3389/fphys.2025.1373721)
Supplement: Supplementary file 3 [file Table9.xlsx]

## Sheet: 14gene-KEGG
#Term	Database	ID	Count	P-Value	FDR	Input	Hyperlink
Apoptosis	KEGG PATHWAY	hsa04210	11	4.99e-25	6.39e-23	BCL2L1|RIPK1|NFKBIA|AKT1|TNFRSF1A|BIRC3|BIRC2|CASP8|IKBKB|CFLAR|XIAP	http://www.genome.jp/kegg-bin/show_pathway?hsa04210/hsa:3551%09red/hsa:330%09red/hsa:598%09red/hsa:8837%09red/hsa:4792%09red/hsa:7132%09red/hsa:329%09red/hsa:841%09red/hsa:331%09red/hsa:8737%09red/hsa:207%09red
NF-kappa B signaling pathway	KEGG PATHWAY	hsa04064	10	1.94e-23	1.24e-21	BCL2L1|RIPK1|TNFRSF1A|NFKBIA|BIRC3|BIRC2|IKBKB|CFLAR|XIAP|IL1B	http://www.genome.jp/kegg-bin/show_pathway?hsa04064/hsa:3551%09red/hsa:3553%09red/hsa:330%09red/hsa:598%09red/hsa:8837%09red/hsa:4792%09red/hsa:7132%09red/hsa:329%09red/hsa:331%09red/hsa:8737%09red
TNF signaling pathway	KEGG PATHWAY	hsa04668	10	5.7e-23	1.99e-21	RIPK1|NFKBIA|AKT1|TNFRSF1A|BIRC3|BIRC2|CASP8|IKBKB|CFLAR|IL1B	http://www.genome.jp/kegg-bin/show_pathway?hsa04668/hsa:3551%09red/hsa:3553%09red/hsa:330%09red/hsa:8837%09red/hsa:4792%09red/hsa:7132%09red/hsa:329%09red/hsa:841%09red/hsa:8737%09red/hsa:207%09red
Necroptosis	KEGG PATHWAY	hsa04217	10	1.97e-21	5.05e-20	STAT3|TNFRSF1A|CASP1|BIRC3|BIRC2|CASP8|RIPK1|CFLAR|XIAP|IL1B	http://www.genome.jp/kegg-bin/show_pathway?hsa04217/hsa:834%09red/hsa:3553%09red/hsa:330%09red/hsa:8837%09red/hsa:7132%09red/hsa:329%09red/hsa:841%09red/hsa:6774%09red/hsa:331%09red/hsa:8737%09red
NOD-like receptor signaling pathway	KEGG PATHWAY	hsa04621	10	4.9e-21	1.05e-19	BCL2L1|RIPK1|CASP1|NFKBIA|BIRC3|BIRC2|CASP8|IKBKB|XIAP|IL1B	http://www.genome.jp/kegg-bin/show_pathway?hsa04621/hsa:834%09red/hsa:3551%09red/hsa:3553%09red/hsa:330%09red/hsa:598%09red/hsa:4792%09red/hsa:329%09red/hsa:841%09red/hsa:331%09red/hsa:8737%09red
Apoptosis - multiple species	KEGG PATHWAY	hsa04215	6	1.92e-15	2.73e-14	BCL2L1|TNFRSF1A|BIRC3|BIRC2|CASP8|XIAP	http://www.genome.jp/kegg-bin/show_pathway?hsa04215/hsa:598%09red/hsa:7132%09red/hsa:329%09red/hsa:841%09red/hsa:331%09red/hsa:330%09red
Pathways in cancer	KEGG PATHWAY	hsa05200	9	3.06e-14	2.79e-13	BCL2L1|STAT3|NFKBIA|BIRC3|BIRC2|CASP8|IKBKB|AKT1|XIAP	http://www.genome.jp/kegg-bin/show_pathway?hsa05200/hsa:3551%09red/hsa:6774%09red/hsa:598%09red/hsa:4792%09red/hsa:329%09red/hsa:841%09red/hsa:331%09red/hsa:330%09red/hsa:207%09red
Platinum drug resistance	KEGG PATHWAY	hsa01524	6	1.62e-13	1.3e-12	BCL2L1|BIRC3|BIRC2|CASP8|AKT1|XIAP	http://www.genome.jp/kegg-bin/show_pathway?hsa01524/hsa:598%09red/hsa:329%09red/hsa:841%09red/hsa:331%09red/hsa:330%09red/hsa:207%09red
C-type lectin receptor signaling pathway	KEGG PATHWAY	hsa04625	6	1.24e-12	8.37e-12	CASP1|NFKBIA|CASP8|IKBKB|AKT1|IL1B	http://www.genome.jp/kegg-bin/show_pathway?hsa04625/hsa:834%09red/hsa:3551%09red/hsa:3553%09red/hsa:4792%09red/hsa:841%09red/hsa:207%09red
Toll-like receptor signaling pathway	KEGG PATHWAY	hsa04620	6	1.24e-12	8.37e-12	RIPK1|NFKBIA|CASP8|IKBKB|AKT1|IL1B	http://www.genome.jp/kegg-bin/show_pathway?hsa04620/hsa:3551%09red/hsa:3553%09red/hsa:4792%09red/hsa:841%09red/hsa:8737%09red/hsa:207%09red
Cytosolic DNA-sensing pathway	KEGG PATHWAY	hsa04623	5	2.65e-11	1.7e-10	IKBKB|RIPK1|IL1B|NFKBIA|CASP1	http://www.genome.jp/kegg-bin/show_pathway?hsa04623/hsa:834%09red/hsa:3551%09red/hsa:3553%09red/hsa:8737%09red/hsa:4792%09red
Adipocytokine signaling pathway	KEGG PATHWAY	hsa04920	5	4.1e-11	2.38e-10	IKBKB|AKT1|NFKBIA|STAT3|TNFRSF1A	http://www.genome.jp/kegg-bin/show_pathway?hsa04920/hsa:3551%09red/hsa:4792%09red/hsa:6774%09red/hsa:207%09red/hsa:7132%09red
Insulin resistance	KEGG PATHWAY	hsa04931	5	3.54e-10	1.81e-09	IKBKB|AKT1|NFKBIA|STAT3|TNFRSF1A	http://www.genome.jp/kegg-bin/show_pathway?hsa04931/hsa:3551%09red/hsa:4792%09red/hsa:6774%09red/hsa:207%09red/hsa:7132%09red
Osteoclast differentiation	KEGG PATHWAY	hsa04380	5	8.08e-10	3.83e-09	IKBKB|AKT1|IL1B|NFKBIA|TNFRSF1A	http://www.genome.jp/kegg-bin/show_pathway?hsa04380/hsa:3551%09red/hsa:4792%09red/hsa:3553%09red/hsa:207%09red/hsa:7132%09red
RIG-I-like receptor signaling pathway	KEGG PATHWAY	hsa04622	4	1.15e-08	4.74e-08	IKBKB|RIPK1|NFKBIA|CASP8	http://www.genome.jp/kegg-bin/show_pathway?hsa04622/hsa:3551%09red/hsa:4792%09red/hsa:8737%09red/hsa:841%09red
PD-L1 expression and PD-1 checkpoint pathway in cancer	KEGG PATHWAY	hsa05235	4	2.9e-08	1.09e-07	IKBKB|AKT1|NFKBIA|STAT3	http://www.genome.jp/kegg-bin/show_pathway?hsa05235/hsa:3551%09red/hsa:4792%09red/hsa:6774%09red/hsa:207%09red
IL-17 signaling pathway	KEGG PATHWAY	hsa04657	4	3.44e-08	1.26e-07	IKBKB|IL1B|NFKBIA|CASP8	http://www.genome.jp/kegg-bin/show_pathway?hsa04657/hsa:3551%09red/hsa:4792%09red/hsa:3553%09red/hsa:841%09red
Th17 cell differentiation	KEGG PATHWAY	hsa04659	4	5.93e-08	2.11e-07	IKBKB|IL1B|NFKBIA|STAT3	http://www.genome.jp/kegg-bin/show_pathway?hsa04659/hsa:3551%09red/hsa:3553%09red/hsa:4792%09red/hsa:6774%09red
Chemokine signaling pathway	KEGG PATHWAY	hsa04062	4	5.57e-07	1.83e-06	IKBKB|AKT1|NFKBIA|STAT3	http://www.genome.jp/kegg-bin/show_pathway?hsa04062/hsa:3551%09red/hsa:4792%09red/hsa:6774%09red/hsa:207%09red
Focal adhesion	KEGG PATHWAY	hsa04510	4	6.67e-07	2.13e-06	AKT1|XIAP|BIRC3|BIRC2	http://www.genome.jp/kegg-bin/show_pathway?hsa04510/hsa:329%09red/hsa:331%09red/hsa:330%09red/hsa:207%09red
MAPK signaling pathway	KEGG PATHWAY	hsa04010	4	3.11e-06	9.15e-06	IKBKB|AKT1|IL1B|TNFRSF1A	http://www.genome.jp/kegg-bin/show_pathway?hsa04010/hsa:3551%09red/hsa:3553%09red/hsa:207%09red/hsa:7132%09red
EGFR tyrosine kinase inhibitor resistance	KEGG PATHWAY	hsa01521	3	3.14e-06	9.15e-06	BCL2L1|AKT1|STAT3	http://www.genome.jp/kegg-bin/show_pathway?hsa01521/hsa:6774%09red/hsa:207%09red/hsa:598%09red
B cell receptor signaling pathway	KEGG PATHWAY	hsa04662	3	3.5e-06	9.97e-06	IKBKB|AKT1|NFKBIA	http://www.genome.jp/kegg-bin/show_pathway?hsa04662/hsa:3551%09red/hsa:4792%09red/hsa:207%09red
T cell receptor signaling pathway	KEGG PATHWAY	hsa04660	3	6.82e-06	1.78e-05	IKBKB|AKT1|NFKBIA	http://www.genome.jp/kegg-bin/show_pathway?hsa04660/hsa:3551%09red/hsa:4792%09red/hsa:207%09red
Neurotrophin signaling pathway	KEGG PATHWAY	hsa04722	3	1.04e-05	2.66e-05	IKBKB|AKT1|NFKBIA	http://www.genome.jp/kegg-bin/show_pathway?hsa04722/hsa:3551%09red/hsa:4792%09red/hsa:207%09red
Autophagy - animal	KEGG PATHWAY	hsa04140	3	1.29e-05	3.23e-05	BCL2L1|CFLAR|AKT1	http://www.genome.jp/kegg-bin/show_pathway?hsa04140/hsa:8837%09red/hsa:207%09red/hsa:598%09red
FoxO signaling pathway	KEGG PATHWAY	hsa04068	3	1.41e-05	3.47e-05	IKBKB|AKT1|STAT3	http://www.genome.jp/kegg-bin/show_pathway?hsa04068/hsa:3551%09red/hsa:6774%09red/hsa:207%09red
Ubiquitin mediated proteolysis	KEGG PATHWAY	hsa04120	3	1.57e-05	3.79e-05	XIAP|BIRC3|BIRC2	http://www.genome.jp/kegg-bin/show_pathway?hsa04120/hsa:329%09red/hsa:331%09red/hsa:330%09red
mTOR signaling pathway	KEGG PATHWAY	hsa04150	3	2.17e-05	5.14e-05	IKBKB|AKT1|TNFRSF1A	http://www.genome.jp/kegg-bin/show_pathway?hsa04150/hsa:3551%09red/hsa:207%09red/hsa:7132%09red
Jak-STAT signaling pathway	KEGG PATHWAY	hsa04630	3	2.56e-05	5.97e-05	BCL2L1|AKT1|STAT3	http://www.genome.jp/kegg-bin/show_pathway?hsa04630/hsa:6774%09red/hsa:207%09red/hsa:598%09red
Alzheimer disease	KEGG PATHWAY	hsa05010	3	3.01e-05	6.87e-05	IL1B|CASP8|TNFRSF1A	http://www.genome.jp/kegg-bin/show_pathway?hsa05010/hsa:3553%09red/hsa:841%09red/hsa:7132%09red
Viral carcinogenesis	KEGG PATHWAY	hsa05203	3	4.82e-05	0.000108344	NFKBIA|STAT3|CASP8	http://www.genome.jp/kegg-bin/show_pathway?hsa05203/hsa:4792%09red/hsa:6774%09red/hsa:841%09red
Ras signaling pathway	KEGG PATHWAY	hsa04014	3	7.34e-05	0.000159278	IKBKB|AKT1|BCL2L1	http://www.genome.jp/kegg-bin/show_pathway?hsa04014/hsa:3551%09red/hsa:207%09red/hsa:598%09red
PI3K-Akt signaling pathway	KEGG PATHWAY	hsa04151	3	0.000251969	0.000537534	IKBKB|AKT1|BCL2L1	http://www.genome.jp/kegg-bin/show_pathway?hsa04151/hsa:3551%09red/hsa:207%09red/hsa:598%09red
