# Supplementary material for: Utilizing bioinformatics to identify biomarkers and analyze their expression in relation to immune cell ratios in femoral head necrosis
Source: Front Physiol. 2025 Apr 16;16:1373721. doi: 10.3389/fphys.2025.1373721 (PMC12040900; doi:10.3389/fphys.2025.1373721)
Supplement: Supplementary file 4 [file Table6.xlsx]

## Sheet: common-DEGs-infor
Gene.Symbol	ID	FDR	P.Value	logFC
AKT1	11716087_s_at	7.35e-06	7.1e-08	0.888837
AKT1S1	11754679_a_at	0.00016	5.74e-06	-0.846605
AKT2	11749525_a_at	0.00456	0.000594	-1.05295
ATG14	11725487_at	0.00186	0.000173	-0.721482
ATG4D	11746221_a_at	1.57e-05	2.06e-07	-0.665132
ATG7	11740814_a_at	0.00373	0.000452	0.591642
ATG9A	11716830_a_at	0.000482	2.67e-05	-0.667735
ATM	11751874_a_at	0.00221	0.00022	0.517672
BCAP31	11715423_s_at	1.27e-05	1.52e-07	0.583704
BCL2L1	11739957_a_at	1.16e-05	1.34e-07	-1.44128
BCL2L11	11718078_a_at	4.85e-05	1.01e-06	0.57598
BID	11732217_a_at	0.000198	7.79e-06	0.566332
BIRC2	11750887_a_at	0.00245	0.000252	-0.664813
BIRC3	11722852_s_at	0.00689	0.00107	0.68337
BIRC5	11733864_a_at	0.0186	0.00436	-0.567516
BNIP3L	11757303_s_at	2.43e-08	2.22e-11	-1.83252
BOK	11718629_at	0.00111	8.55e-05	-0.534962
CAPN2	11750167_a_at	0.00346	0.000405	0.648076
CARD8	11747703_x_at	0.00639	0.000956	0.608282
CASP1	11761103_a_at	0.00909	0.00158	0.742831
CASP2	11720035_s_at	4.27e-05	8.51e-07	0.573351
CASP4	11760491_at	0.00825	0.00137	0.785144
CASP5	11753343_a_at	0.0338	0.0103	0.614636
CASP8	11728978_x_at	0.00542	0.000758	0.653321
CD14	11741519_s_at	0.000143	4.88e-06	1.33664
CFLAR	11753152_x_at	0.00359	0.000428	0.621609
CHMP2B	11724748_at	0.00983	0.00177	0.63238
CHMP7	11716147_s_at	0.000243	1.03e-05	0.663915
CHP1	11756650_a_at	1.54e-05	2e-07	-0.961937
CHUK	11754797_a_at	0.00635	0.000947	0.567367
CRADD	11739913_a_at	0.0468	0.0164	-0.553642
CSF2RB	11758608_s_at	3.18e-05	5.47e-07	1.23277
DAPK1	11720146_a_at	0.0105	0.00192	0.753871
DAPK2	11730526_x_at	0.0028	0.000303	0.61796
DBNL	11747076_a_at	7.04e-05	1.74e-06	0.533542
DFFB	11745428_a_at	0.00156	0.000137	0.720578
DYNC1H1	11715590_at	0.003	0.000333	0.513404
DYNC1LI1	11720787_a_at	0.00191	0.000179	0.549601
DYNC1LI2	11716010_s_at	0.00637	0.00095	0.500408
DYNLL1	11753833_a_at	2.09e-06	1.12e-08	-0.962755
E2F1	11723713_at	0.00224	0.000224	-0.805049
ELANE	11727965_at	0.025	0.00661	-1.16472
ENDOD1	11757845_s_at	1.85e-05	2.58e-07	-0.924636
FAS	11725998_a_at	0.00637	0.000952	0.683578
FUNDC1	11731671_at	0.0196	0.00471	0.589187
GABARAPL2	11747514_a_at	8.02e-07	3.06e-09	-1.22866
GSN	11723329_a_at	0.012	0.00233	0.539666
IGF1R	11718704_at	0.0225	0.00569	0.575547
IKBKB	11755412_x_at	0.000347	1.66e-05	0.503131
IKBKG	11756119_a_at	0.00172	0.000155	-0.538192
IL1B	11719916_at	0.00926	0.00162	0.733656
IL1RAP	11729099_a_at	0.0204	0.00498	0.629317
IRAK4	11734067_a_at	0.000463	2.51e-05	0.764641
IRF1	11754035_a_at	0.0133	0.0027	0.678628
IRF2	11754330_a_at	0.000178	6.7e-06	0.766706
IRF4	11717508_at	0.0277	0.00773	0.675802
KPNB1	11744839_a_at	0.0145	0.00303	0.711976
LAMP2	11749876_a_at	0.00323	0.000368	0.7294
LAMTOR4	11757392_a_at	0.000133	4.4e-06	0.806707
MAP1LC3B	11731632_s_at	3.92e-06	2.71e-08	-1.21525
MAP2K4	11732822_a_at	0.000328	1.54e-05	0.649763
MAP3K1	11728094_s_at	0.000141	4.81e-06	0.819004
MAP3K14	11724902_a_at	3.34e-05	5.83e-07	0.638215
MAPK1	11715842_a_at	6.11e-06	5.24e-08	-1.01051
MAPK3	11717543_x_at	0.000616	3.76e-05	0.624112
MCL1	11715483_s_at	5.93e-05	1.36e-06	0.960606
MFN1	11755894_a_at	0.0222	0.00559	0.533987
MTMR14	11727678_a_at	0.000424	2.23e-05	0.55542
MTMR3	11721020_a_at	0.00232	0.000235	0.658675
MYD88	11747538_a_at	0.00748	0.0012	0.582863
NFKB1	11717542_a_at	4.26e-05	8.49e-07	0.582816
NFKBIA	11744000_a_at	0.0225	0.00571	0.534216
NFKBIE	11743007_at	0.00643	0.000964	0.552894
NLRP1	11737423_a_at	2.17e-07	4.66e-10	0.972571
OPA1	11743529_a_at	0.000265	1.15e-05	-0.818334
PAK2	11739273_at	0.000378	1.88e-05	0.567695
PIK3CD	11719497_at	3.36e-05	5.89e-07	0.625665
PIK3R2	11744004_at	0.000325	1.52e-05	-0.733296
PIK3R5	11721761_a_at	2.55e-05	4.09e-07	0.656413
PINK1	11726996_at	0.000297	1.33e-05	-1.06341
PLEC	11715926_s_at	3.48e-05	6.29e-07	0.660596
PLIN3	11722993_x_at	0.0138	0.00283	0.532012
PPP3CA	11722848_a_at	0.0376	0.012	0.525482
PPP3CB	11760342_a_at	1.17e-06	4.88e-09	-1.04304
PPP3R1	11747093_a_at	3.1e-05	5.26e-07	-1.04084
PRF1	11729649_at	0.0269	0.00739	0.655419
PRKACA	11757881_s_at	1.34e-06	5.86e-09	0.966934
PRKAG2	11736245_a_at	0.000503	2.84e-05	0.70739
PRKAR1A	11722007_a_at	0.00161	0.000143	0.609494
PRKCD	11727841_a_at	0.000175	6.51e-06	0.985219
PRKX	11721056_x_at	0.0062	0.000916	0.589267
PSMB10	11716640_a_at	0.0106	0.00197	0.544346
PSMB3	11715732_at	0.000384	1.92e-05	0.788493
PSMB8	11715665_a_at	0.0405	0.0134	0.549374
PSMB9	11726677_a_at	0.00377	0.000457	0.804775
PSMD12	11732779_a_at	0.011	0.00207	0.526722
PSMD9	11730205_at	1.03e-05	1.15e-07	-0.617851
PSME4	11717864_a_at	3.5e-07	9.23e-10	-1.38983
PSMF1	11759400_at	2.26e-05	3.41e-07	-1.50685
RIPK1	11756807_a_at	9.34e-05	2.69e-06	0.698989
RPS27A	11741791_at	0.00224	0.000224	-0.700117
RRAGB	11732261_a_at	1.08e-05	1.24e-07	-0.889239
RRAGC	11758809_at	0.00691	0.00107	0.520962
SATB1	11741059_s_at	0.0189	0.00444	0.720519
SCAF11	11754753_a_at	0.000804	5.4e-05	0.570845
STAT3	11750674_a_at	0.0052	0.000716	0.59466
TFDP1	11748055_x_at	2.71e-08	2.59e-11	-1.93714
TFDP2	11758929_at	8.5e-08	1.38e-10	-1.98244
TLR4	11743196_a_at	0.0296	0.00848	0.56073
TNFRSF10B	11719680_x_at	6.51e-06	5.84e-08	0.978555
TNFRSF10C	11760679_at	0.000777	5.15e-05	1.09157
TNFRSF10D	11723310_at	0.000703	4.47e-05	0.628075
TNFRSF1A	11752814_s_at	0.00039	1.97e-05	0.759793
TNFRSF1B	11755013_x_at	0.000264	1.14e-05	0.907683
TNFRSF25	11722134_a_at	0.0089	0.00153	0.629849
TNFSF10	11743731_a_at	0.0043	0.000549	1.02085
TRADD	11725373_a_at	2.33e-05	3.58e-07	0.570556
TRAF1	11721588_at	0.000195	7.65e-06	0.682433
TRAF3	11743501_a_at	0.000372	1.84e-05	0.502151
TSC1	11739935_a_at	0.000281	1.24e-05	-0.75026
TUBA1A	11727362_x_at	0.00078	5.19e-05	0.899229
TUBB1	11725897_at	0.0037	0.000447	1.16271
TUBB4B	11750415_x_at	2.35e-05	3.64e-07	-0.653397
TUBB6	11747072_s_at	0.00419	0.000528	-0.581806
UBAP1	11747930_x_at	8.9e-05	2.51e-06	-0.691822
UBC	11755503_x_at	7.71e-05	1.99e-06	0.519604
UBE2V1	11753660_x_at	1.65e-06	7.82e-09	-0.93756
VIM	11755943_x_at	0.00148	0.000127	0.602726
VPS37C	11754863_s_at	1.61e-06	7.5e-09	0.672437
WDR45	11728227_a_at	0.00346	0.000405	-0.748724
WIPI2	11735137_a_at	0.00027	1.18e-05	-0.654638
XIAP	11725699_at	0.000973	7.04e-05	0.643397
YWHAB	11725042_a_at	0.00296	0.000325	0.578904
YWHAZ	11758750_x_at	0.00476	0.000632	0.536625
