# Supplementary material for: Utilizing bioinformatics to identify biomarkers and analyze their expression in relation to immune cell ratios in femoral head necrosis
Source: Front Physiol. 2025 Apr 16;16:1373721. doi: 10.3389/fphys.2025.1373721 (PMC12040900; doi:10.3389/fphys.2025.1373721)
Supplement: Supplementary file 6 [file Table4.xlsx]

## Sheet: RFE-infor
Variables Accuracy Kappa AccuracySD KappaSD Selected
1 0.775 0.1500 0.07906 0.3375
2 0.800 0.3867 0.19720 0.5432
3 0.850 0.4667 0.17480 0.5709
4 0.875 0.5000 0.13176 0.5270 *
5 0.850 0.4667 0.17480 0.5709
6 0.850 0.4000 0.12910 0.5164
7 0.850 0.4000 0.12910 0.5164
The top 4 variables (out of 4):
Neutrophil, Mast.cell.resting, Myeloid.dendritic.cell.activated, Macrophage.M0

## Sheet: LASSO-infor
Cell type	Coef
Neutrophil	0.518429
T.cell.CD8.	.
Myeloid.dendritic.cell.activated	-14.7017
NK.cell.resting	.
Mast.cell.resting	-5.31739
Macrophage.M0	-2.28856
Macrophage.M1	.
