# Supplementary material for: Utilizing bioinformatics to identify biomarkers and analyze their expression in relation to immune cell ratios in femoral head necrosis
Source: Front Physiol. 2025 Apr 16;16:1373721. doi: 10.3389/fphys.2025.1373721 (PMC12040900; doi:10.3389/fphys.2025.1373721)
Supplement: Supplementary file 8 [file Table10.xlsx]

## Sheet: GSE123568-14exp
Group	ID	AKT1	BCL2L1	BIRC2	BIRC3	CASP1	CASP8	CFLAR	IKBKB	IL1B	NFKBIA	RIPK1	STAT3	TNFRSF1A	XIAP
non-SONFH	GSM3507251	6.9946	4.49361	7.8745	6.45536	4.18773	8.295	8.19791	6.37622	8.76597	8.29314	6.58058	6.77043	6.90881	8.24913
non-SONFH	GSM3507252	6.33703	6.73312	8.17865	6.81519	4.8779	7.47782	8.23207	5.94083	6.70754	6.76525	6.50102	7.14384	6.95907	6.8169
non-SONFH	GSM3507253	6.41351	6.67072	8.78367	6.36923	5.93271	7.69357	8.5491	6.01642	8.56554	7.01528	6.50425	7.43863	7.22594	7.09226
non-SONFH	GSM3507254	6.13168	6.72038	7.49772	5.91538	5.75004	6.9922	8.23399	5.41624	8.05106	7.0515	6.11792	7.63188	7.0094	6.92552
non-SONFH	GSM3507255	6.01528	6.8363	8.04839	7.14553	3.83337	6.8531	7.46409	5.14948	6.78769	6.3744	5.79273	6.74561	6.45015	6.85791
non-SONFH	GSM3507256	7.01381	6.14611	7.33121	6.51048	3.77576	6.58117	7.13106	6.15787	6.17727	7.44	6.01595	6.43329	5.62297	7.55015
non-SONFH	GSM3507257	5.75439	7.66102	8.02135	6.23304	4.03653	6.31715	7.01479	5.14096	6.54909	6.15662	5.24106	6.92275	6.49314	6.65568
non-SONFH	GSM3507258	7.5731	6.38708	7.68515	7.25057	5.37073	8.70191	9.07279	6.26106	8.60038	7.7343	6.93614	8.3695	7.8905	8.15737
non-SONFH	GSM3507259	6.6233	7.78506	8.88631	7.59179	4.3062	8.29148	8.42977	6.18711	7.21631	6.61862	6.2659	6.63742	6.55457	7.21527
non-SONFH	GSM3507260	7.15414	6.05999	9.40784	7.42188	5.08134	8.63895	8.43747	6.26516	7.34522	7.41319	6.74607	7.42166	7.01647	7.71787
SONFH	GSM3507261	7.51984	5.78773	7.34381	7.80391	5.30853	8.52316	8.95003	6.24153	7.99731	7.83863	7.27315	7.53858	7.61449	8.27181
SONFH	GSM3507262	7.71563	4.73445	7.05435	8.44173	5.21047	8.91572	8.67767	6.48126	7.42541	7.28194	7.02897	7.18496	7.0964	8.41818
SONFH	GSM3507263	7.31012	5.06339	8.08226	8.76962	5.84151	8.42908	8.38851	6.56637	7.52241	7.3853	7.22451	6.89893	7.24427	8.45545
SONFH	GSM3507264	7.25295	5.60104	7.66577	7.43071	5.49861	7.9887	8.47133	6.31721	8.17728	7.12133	6.65414	7.60151	7.50223	7.68727
SONFH	GSM3507265	7.98709	5.024	7.02445	6.97331	5.12916	8.26067	8.84696	6.54489	8.32445	7.5134	7.24653	8.33816	8.06381	8.03353
SONFH	GSM3507266	7.71886	4.93126	7.00059	7.68051	5.54528	8.12518	8.74847	6.49962	8.05576	7.71312	6.96744	8.0294	7.72158	8.19846
SONFH	GSM3507267	6.86181	6.25454	7.18241	7.03075	4.45676	7.46623	7.54714	6.04998	7.22781	6.36396	6.18591	6.90428	6.76522	7.01012
SONFH	GSM3507268	7.47844	5.83336	7.58467	7.4876	5.17936	8.12073	8.77658	6.41872	8.35913	7.36267	6.95964	7.77903	7.57073	7.77423
SONFH	GSM3507269	7.1765	6.18428	7.11134	6.50951	5.58277	7.92384	8.61928	6.1937	8.57043	7.4272	6.50613	7.99064	7.56903	7.63844
SONFH	GSM3507270	7.61871	4.81519	7.57853	7.29328	5.60329	8.52873	8.533	6.38708	8.05026	7.55976	7.37359	7.31047	7.64313	7.94597
SONFH	GSM3507271	8.18941	4.52308	8.10696	7.04925	6.96641	8.41136	9.08111	6.76677	8.6786	7.88617	7.3789	7.51714	7.64653	8.70154
SONFH	GSM3507272	7.57613	5.36588	7.27833	7.47924	4.6101	8.11003	8.58541	6.21328	8.08196	7.36188	6.71936	7.61552	7.45898	8.02814
SONFH	GSM3507273	7.68018	4.60727	7.42046	6.78924	5.41602	7.97111	8.65855	6.22644	8.7061	7.75985	7.15932	7.93925	7.95002	7.87049
SONFH	GSM3507274	7.72345	4.83401	7.36998	7.13814	5.58904	8.61267	8.81153	6.48583	8.69056	7.9974	6.89662	7.99202	7.56812	8.0767
SONFH	GSM3507275	7.43662	4.5442	7.56656	6.95564	5.1054	8.27443	8.71255	6.62352	8.29554	7.63217	7.06625	7.77097	7.28727	8.21638
SONFH	GSM3507276	7.42988	5.78579	7.55891	7.61805	5.21261	8.09609	8.65052	6.1702	7.99134	7.51324	6.82078	7.74936	7.38746	7.77018
SONFH	GSM3507277	7.73289	5.18146	7.10332	6.44126	5.85879	8.62699	8.99244	6.1731	8.41126	7.96098	7.19419	8.33968	8.19707	7.81482
SONFH	GSM3507278	7.94991	4.81171	7.55013	7.73125	5.39045	8.40949	8.92502	6.54324	8.20193	7.7202	7.19087	7.90229	7.37108	7.99305
SONFH	GSM3507279	7.60233	5.22349	7.38635	7.67048	5.73142	8.55659	9.116	6.4438	8.78911	8.37876	7.41045	8.11752	8.04486	8.19243
SONFH	GSM3507280	7.67453	5.12714	7.34734	7.99655	5.34854	8.48476	8.64032	6.52319	8.16469	7.68401	6.73969	7.64562	7.53962	7.98496
SONFH	GSM3507281	7.43729	4.52001	6.72947	7.39367	4.69522	7.53901	8.23446	6.28337	8.42135	7.55421	6.70505	8.01291	7.43502	7.89769
SONFH	GSM3507282	7.10171	4.84152	7.88321	7.37289	5.5929	8.13174	8.45959	6.5935	8.36116	7.10746	6.81501	7.3353	7.20227	7.97449
SONFH	GSM3507283	7.38329	5.03373	8.08078	7.25819	5.79936	8.36409	9.139	6.33836	9.14522	8.25697	6.87281	8.21616	8.4614	7.68158
SONFH	GSM3507284	7.51852	5.0831	7.54341	7.71799	4.45326	7.95297	8.3576	6.39497	7.84072	7.32321	6.48855	7.18169	7.21563	7.5543
SONFH	GSM3507285	7.15724	4.59941	8.25219	7.36088	5.70029	8.51519	9.62874	6.50028	8.71628	8.53055	7.19224	8.58808	8.16819	7.8745
SONFH	GSM3507286	7.32836	5.51693	7.668	7.13784	5.81771	8.41011	8.78376	6.38022	8.00543	7.17018	7.06662	7.71803	7.38648	7.89568
SONFH	GSM3507287	7.36061	4.18185	8.17502	8.25614	6.97423	8.29331	9.25642	6.75371	9.01599	8.60579	7.21812	8.25716	8.01553	8.58212
SONFH	GSM3507288	7.33134	4.86074	7.63132	6.75654	5.29161	8.00273	8.47383	6.27328	8.00059	7.35373	7.07445	7.47377	7.74883	7.93243
SONFH	GSM3507289	7.55096	4.47319	7.85411	8.21048	5.39196	8.20607	8.50692	6.44369	7.48915	8.08528	7.11985	7.68669	7.4176	8.14144
SONFH	GSM3507290	6.8931	5.89804	7.06593	7.87184	5.44084	7.8759	8.36463	5.99691	7.59066	7.16402	6.52541	7.74972	6.89396	7.39965

## Sheet: GSE74089-14exp
Group	Symbol	AKT1	BCL2L1	BIRC2	BIRC3	CASP1	CASP8	CFLAR	IKBKB	IL1B	NFKBIA	RIPK1	STAT3	TNFRSF1A	XIAP
	pvalue	0.030883	0.0493229	0.00374733	0.0391786	0.0244952	0.0625701	0.00843061	0.0183413	0.000679931	0.000886821	0.000215006	0.0236468	0.136619	0.0286576
CTRL	GSM1909502	10.0313	4.9164	6.62266	4.63804	3.00955	2.42257	3.79699	11.863	2.12257	9.85837	7.56944	6.61967	8.42662	7.72312
CTRL	GSM1909505	10.0201	4.98163	6.44192	4.08525	3.04789	2.53365	2.53365	11.055	2.13365	9.7538	7.23323	6.22848	8.00381	7.53082
CTRL	GSM1909508	10.0444	5.52312	6.81205	4.07057	3.02481	2.76023	2.76023	11.9239	2.16023	9.97939	7.42599	7.07458	8.60913	8.06934
CTRL	GSM1909509	10.1489	4.53888	6.35189	4.67609	2.87064	2.32528	3.94928	10.9964	2.06769	9.40216	7.25193	5.59706	7.09793	6.22102
NFH	GSM1909503	10.709	3.68685	6.12105	4.9474	3.61903	2.80415	4.55082	12.6364	2.35313	10.9174	8.34401	7.75651	8.93362	9.02479
NFH	GSM1909504	10.3397	4.75708	5.76897	4.88589	3.09833	3.48196	5.36032	12.5702	2.48196	10.7716	8.09857	7.66065	8.53097	8.92577
NFH	GSM1909506	10.8158	4.26307	6.04228	5.08093	3.49156	3.54249	5.5221	12.6801	2.37344	10.9665	8.28648	7.76508	8.61799	9.04073
NFH	GSM1909507	10.3018	4.31195	5.77798	4.74259	3.50506	2.68612	4.68906	12.4032	2.35339	10.684	8.17661	7.52631	8.75722	8.92777
