# Supplementary material for: Utilizing bioinformatics to identify biomarkers and analyze their expression in relation to immune cell ratios in femoral head necrosis
Source: Front Physiol. 2025 Apr 16;16:1373721. doi: 10.3389/fphys.2025.1373721 (PMC12040900; doi:10.3389/fphys.2025.1373721)
Supplement: Supplementary file 10 [file Table5.xlsx]

## Sheet: GSE123568-test-sig
Gene.Symbol	ID	FDR	PValue	logFC
EIF1AY	11720807_x_at	0.00845	0.00142	-3.59867
CA1	11729582_s_at	6.95e-07	2.52e-09	-3.56909
BPGM	11719581_a_at	8.09e-09	4.35e-12	-3.38796
GYPA	11732236_a_at	7.95e-09	3.87e-12	-3.30603
RAP1GAP	11725497_a_at	5.32e-08	7.56e-11	-3.25196
SNCA	11731448_a_at	4.53e-07	1.36e-09	-3.09736
IFIT1B	11737280_at	2.44e-07	5.5e-10	-2.99701
GYPB	11745557_x_at	2e-06	1.02e-08	-2.98666
HEMGN	11736696_a_at	3.02e-07	7.48e-10	-2.94376
XK	11728138_at	1.17e-06	4.88e-09	-2.89711
BBOF1	11729920_at	3.44e-07	8.94e-10	-2.89181
CTNNAL1	11720494_a_at	1.35e-09	2.73e-13	-2.86124
FECH	11727807_at	6.47e-06	5.76e-08	-2.83948
DNAJC6	11745300_a_at	8.09e-09	4.43e-12	-2.77977
TMCC2	11721930_a_at	3.17e-08	3.34e-11	-2.76008
HEPACAM2	11728821_a_at	3.16e-09	1.14e-12	-2.66542
SLC14A1	11733360_x_at	1.67e-06	8.06e-09	-2.66125
KRT1	11723952_at	5.58e-05	1.25e-06	-2.48639
IFI27	11715893_s_at	0.0119	0.00232	-2.48242
RHD	11737267_a_at	2.44e-05	3.85e-07	-2.46646
ACSL6	11722470_x_at	4.15e-06	2.96e-08	-2.46373
TSPAN7	11715752_at	1.4e-07	2.54e-10	-2.43494
DYRK3	11733482_a_at	4.05e-08	5.18e-11	-2.42418
RNF182	11737774_a_at	0.00501	0.000681	-2.41952
CISD2	11721656_s_at	6.58e-09	3.07e-12	-2.41365
YOD1	11724635_at	9.14e-08	1.52e-10	-2.36746
ARL4A	11739230_a_at	3.81e-08	4.4e-11	-2.34635
ISCA1	11716467_x_at	9.05e-08	1.49e-10	-2.34399
ABCG2	11724538_a_at	1.43e-06	6.34e-09	-2.32994
AHSP	11718997_at	5.46e-05	1.21e-06	-2.32229
KANK2	11717871_s_at	4.05e-08	5.05e-11	-2.31812
UBE2H	11728670_a_at	5.92e-07	2.08e-09	-2.29968
MXI1	11730499_a_at	1.8e-07	3.61e-10	-2.27936
NFIX	11727161_a_at	1.97e-08	1.4e-11	-2.25901
RHAG	11758545_s_at	2.17e-07	4.65e-10	-2.13138
FHDC1	11743306_at	4.97e-06	3.92e-08	-2.11416
TMEM56	11729940_x_at	1.9e-05	2.72e-07	-2.11227
RIOK3	11747125_a_at	1.78e-07	3.53e-10	-2.10052
SIAH2	11743067_at	1.93e-06	9.72e-09	-2.09789
SOX6	11726179_a_at	1.9e-07	3.94e-10	-2.08026
SLC4A1	11758430_s_at	0.000264	1.14e-05	-2.07008
ALDH5A1	11719359_a_at	2.49e-07	5.75e-10	-2.06441
SEC62	11731452_s_at	1.33e-09	2.42e-13	-2.06191
TSTA3	11749318_a_at	2.56e-09	6.49e-13	-2.04945
PIP5K1B	11747546_a_at	2.56e-09	6.74e-13	-2.03136
ANK1	11741071_a_at	6.17e-05	1.46e-06	-2.03037
TBCEL	11733941_a_at	1.19e-07	2.05e-10	-2.02148
SLC7A5	11739061_at	1.87e-07	3.82e-10	-2.01343
USP12	11733100_at	2.48e-07	5.67e-10	-1.9844
TFDP2	11758929_at	8.5e-08	1.38e-10	-1.98244
KLF1	11730138_at	0.000122	3.88e-06	-1.9627
CA2	11733115_a_at	4.57e-07	1.4e-09	-1.93816
TFDP1	11748055_x_at	2.71e-08	2.59e-11	-1.93714
THEM5	11736949_at	8.26e-06	8.56e-08	-1.93121
TRIM58	11731997_at	5.96e-05	1.37e-06	-1.90777
2023-03-08	11741305_a_at	5.3e-05	1.16e-06	-1.90647
SLC2A1	11752572_a_at	1.36e-06	6e-09	-1.90456
KCNH2	11733662_a_at	0.000365	1.78e-05	-1.8959
SELENBP1	11716401_a_at	0.000236	9.86e-06	-1.89373
GADD45A	11717039_a_at	9.05e-07	3.52e-09	-1.89024
PITHD1	11756446_a_at	2.8e-06	1.7e-08	-1.88476
PAQR9	11731947_at	4.09e-06	2.91e-08	-1.88409
RNF11	11749608_a_at	5.13e-06	4.09e-08	-1.88053
CLIC2	11734784_a_at	2.38e-08	1.88e-11	-1.85476
ACSM3	11727427_a_at	2.39e-05	3.74e-07	-1.83837
BNIP3L	11757303_s_at	2.43e-08	2.22e-11	-1.83252
GYPE	11735856_s_at	7.71e-07	2.88e-09	-1.82244
TGM2	11718399_s_at	2.2e-05	3.28e-07	-1.82096
DPCD	11719122_at	6.13e-06	5.3e-08	-1.79779
PRDX2	11745463_x_at	2.86e-06	1.74e-08	-1.79091
ARG2	11757776_s_at	3.87e-08	4.67e-11	-1.78886
DCUN1D1	11726326_a_at	4.92e-06	3.86e-08	-1.78396
PBX1	11757871_s_at	2.69e-05	4.4e-07	-1.7808
HACD1	11729887_at	5.32e-05	1.17e-06	-1.77723
FGFR1OP2	11744747_a_at	0.000155	5.49e-06	-1.77351
MMP8	11729349_at	0.00289	0.000315	-1.76219
ARHGEF12	11750580_x_at	0.000148	5.14e-06	-1.74804
TRAK2	11716784_at	3.17e-08	3.32e-11	-1.73966
GLRX5	11721674_s_at	7.08e-06	6.67e-08	-1.738
ST6GALNAC4	11754274_a_at	4.53e-06	3.33e-08	-1.70385
TMOD1	11732501_a_at	7.21e-05	1.8e-06	-1.70176
SPTA1	11734314_at	4.91e-06	3.8e-08	-1.69987
MOSPD1	11747759_a_at	6.48e-08	9.63e-11	-1.68721
NEDD4L	11722424_a_at	0.000714	4.58e-05	-1.68578
IGLL1	11728026_x_at	0.0103	0.00189	-1.68066
REXO2	11751359_a_at	3.02e-08	3e-11	-1.67428
C9orf40	11725148_at	1.4e-07	2.53e-10	-1.6696
TPM1	11761349_x_at	4.61e-05	9.46e-07	-1.6696
SPTB	11729971_at	6.37e-05	1.53e-06	-1.6657
HPS1	11727901_a_at	0.000107	3.23e-06	-1.66383
EPB41	11739122_a_at	8.26e-06	8.54e-08	-1.65857
CTSG	11723339_at	0.0018	0.000165	-1.65636
TSPAN5	11759404_at	0.000185	7.11e-06	-1.64895
SMOX	11741507_a_at	4.61e-05	9.47e-07	-1.63658
TCP11L2	11737373_at	8.24e-05	2.26e-06	-1.6354
CITED2	11753421_a_at	1.87e-05	2.65e-07	-1.63409
ELL2	11736478_a_at	4.08e-05	7.93e-07	-1.63296
SLC1A5	11716866_x_at	8.09e-06	8.26e-08	-1.62728
STOM	11715792_a_at	5.81e-10	8.25e-14	-1.62701
GSPT1	11718223_a_at	0.000371	1.83e-05	-1.62433
RNF14	11719392_a_at	3.11e-08	3.15e-11	-1.60433
KLF3	11759749_at	0.000124	3.96e-06	-1.60164
DNTT	11733889_a_at	0.0238	0.00619	-1.60136
EPB42	11725009_a_at	0.00143	0.000121	-1.58796
GMPR	11720202_at	0.000183	7.03e-06	-1.58562
YPEL4	11755945_a_at	1.09e-05	1.24e-07	-1.58064
MSI2	11733375_a_at	8.03e-07	3.08e-09	-1.58045
HMBS	11720884_a_at	5.48e-06	4.52e-08	-1.57469
TMEM158	11724275_s_at	0.0131	0.00263	-1.57251
AP2B1	11716262_a_at	2.08e-08	1.52e-11	-1.56965
ALAS2	11758412_s_at	0.000598	3.6e-05	-1.56429
FAM104B	11754221_s_at	2.48e-07	5.69e-10	-1.56198
NSUN3	11743928_at	4.05e-08	5.11e-11	-1.55383
CYBRD1	11716310_a_at	0.000209	8.34e-06	-1.55021
ELOVL6	11739910_a_at	6.47e-06	5.76e-08	-1.54322
RPIA	11744116_s_at	2.15e-06	1.18e-08	-1.54275
GCLC	11729218_a_at	2.82e-07	6.83e-10	-1.54071
SMIM5	11754382_a_at	2.16e-05	3.19e-07	-1.53455
IGF2BP2	11757763_s_at	0.000148	5.16e-06	-1.52649
RAB2B	11744458_a_at	0.000435	2.32e-05	-1.52278
KLC3	11731363_a_at	0.00124	9.96e-05	-1.51744
PCGF5	11748523_a_at	9.21e-06	9.9e-08	-1.50902
RAD23A	11748360_s_at	7.65e-06	7.52e-08	-1.50831
MPP1	11752958_a_at	1.33e-05	1.66e-07	-1.50791
TCF3	11755059_s_at	4.54e-10	5.53e-14	-1.50788
PSMF1	11759400_at	2.26e-05	3.41e-07	-1.50685
TPGS2	11716754_a_at	0.000376	1.86e-05	-1.50604
TNS1	11716556_a_at	0.000887	6.19e-05	-1.50542
MOB1B	11753207_a_at	2.44e-07	5.44e-10	-1.50463
DMTN	11741343_a_at	0.000297	1.34e-05	-1.50229
EIF2AK1	11754188_s_at	5.63e-05	1.27e-06	-1.47575
MBNL3	11735581_a_at	0.00151	0.00013	-1.4706
RBM38	11715594_a_at	6.3e-05	1.5e-06	-1.46857
ARG1	11754669_a_at	0.0169	0.00379	-1.46752
RFESD	11735412_a_at	2.15e-06	1.17e-08	-1.46454
SRRD	11757441_s_at	2.7e-05	4.43e-07	-1.46206
TRIM10	11758611_s_at	0.000114	3.52e-06	-1.45776
PIM1	11717258_a_at	0.0005	2.81e-05	-1.45501
WDR26	11721338_a_at	5.12e-05	1.1e-06	-1.45391
ZNF23	11733374_s_at	0.000172	6.37e-06	-1.44591
PNP	11718400_a_at	4.34e-10	4.4e-14	-1.44202
BCL2L1	11739957_a_at	1.16e-05	1.34e-07	-1.44128
FAM104A	11730203_s_at	8.95e-06	9.52e-08	-1.4361
HES6	11718790_at	4.13e-05	8.09e-07	-1.43023
ACP1	11717157_a_at	4.63e-07	1.44e-09	-1.42878
CTHRC1	11744718_a_at	0.0175	0.00398	-1.4265
GPR146	11724165_s_at	0.00016	5.74e-06	-1.42527
RUNDC3A	11725435_a_at	0.000866	5.99e-05	-1.42453
VTI1B	11759116_a_at	5.86e-07	2.05e-09	-1.42301
CREG1	11715681_s_at	4.56e-07	1.38e-09	-1.41049
ANKRD9	11745199_x_at	3.4e-05	6.02e-07	-1.4094
SMIM24	11726810_s_at	0.000191	7.43e-06	-1.40331
E2F2	11724079_s_at	4.17e-05	8.18e-07	-1.3963
CMBL	11755947_x_at	1.77e-05	2.43e-07	-1.39344
HIST1H1C	11742683_x_at	2.51e-06	1.46e-08	-1.39071
OSBP2	11736206_a_at	0.00174	0.000157	-1.38999
PSME4	11717864_a_at	3.5e-07	9.23e-10	-1.38983
CNN3	11742743_a_at	0.00168	0.00015	-1.3854
SLC6A8	11730163_x_at	0.000985	7.17e-05	-1.38203
POC1B	11738083_s_at	1.44e-06	6.41e-09	-1.37943
CHPT1	11722070_a_at	9.98e-06	1.11e-07	-1.3774
TFR2	11728023_a_at	0.000176	6.56e-06	-1.37268
POLR1D	11755190_a_at	1.73e-08	1.17e-11	-1.3723
FAM210B	11719476_at	0.000747	4.86e-05	-1.36297
TMEM86B	11754415_a_at	9.2e-05	2.63e-06	-1.36128
WNK1	11743281_a_at	0.000829	5.64e-05	-1.35047
MAN1A1	11752500_a_at	2.26e-05	3.42e-07	-1.34688
BSG	11754083_a_at	3.63e-06	2.39e-08	-1.33896
KAT2B	11720668_at	6.64e-06	6.04e-08	-1.33692
HDGF	11739002_a_at	1.44e-07	2.66e-10	-1.32984
ZER1	11717797_at	0.00037	1.82e-05	-1.32653
FLCN	11735305_a_at	0.00328	0.000376	-1.32642
MAP4K5	11724907_a_at	6.48e-08	9.73e-11	-1.3196
SNX5	11763188_a_at	2.7e-05	4.44e-07	-1.31852
ANKH	11719005_a_at	0.00174	0.000157	-1.30976
C9orf78	11721829_at	7.87e-07	2.99e-09	-1.30914
PCTP	11734777_a_at	2.82e-05	4.67e-07	-1.30884
TBL1XR1	11749744_a_at	3.56e-06	2.33e-08	-1.30589
C2orf88	11754909_a_at	0.00882	0.00151	-1.3035
SNX3	11754173_a_at	1.61e-07	3.11e-10	-1.2978
YIPF6	11739260_a_at	4.92e-07	1.55e-09	-1.29729
BMP2K	11726120_a_at	3.43e-05	6.14e-07	-1.29572
UBE2F	11754037_x_at	4.7e-08	6.57e-11	-1.29447
FOXO3	11718890_x_at	7.84e-06	7.89e-08	-1.29389
HK1	11752103_a_at	1.82e-05	2.52e-07	-1.29337
PGF	11757940_at	0.00707	0.0011	-1.29171
JAZF1	11720530_at	2.19e-05	3.26e-07	-1.28188
MYL6B	11744400_a_at	5.61e-05	1.26e-06	-1.26918
AQP1	11715942_a_at	0.000186	7.18e-06	-1.26143
UROD	11756593_a_at	1.78e-07	3.51e-10	-1.25976
CDKL1	11741692_a_at	1.1e-05	1.26e-07	-1.25707
ZNRF1	11732357_s_at	4.53e-07	1.35e-09	-1.25105
HBS1L	11722415_a_at	0.000238	1e-05	-1.24648
RHCE	11742144_x_at	8.23e-06	8.49e-08	-1.24442
RMND5A	11751446_a_at	6.47e-06	5.79e-08	-1.23864
ADD2	11743001_a_at	6.35e-05	1.52e-06	-1.235
PTPRF	11754235_a_at	2.55e-08	2.38e-11	-1.23358
FKBP8	11746216_x_at	0.000237	9.92e-06	-1.23347
ZBTB44	11718543_at	1.93e-06	9.77e-09	-1.23296
GABARAPL2	11747514_a_at	8.02e-07	3.06e-09	-1.22866
HP	11757277_x_at	0.0152	0.00324	-1.22762
FAXDC2	11755573_s_at	0.0066	0.001	-1.22738
ABCC4	11750651_a_at	7.59e-05	1.94e-06	-1.22395
MAP1LC3B	11731632_s_at	3.92e-06	2.71e-08	-1.21525
RAB6B	11720505_a_at	0.000439	2.35e-05	-1.2145
GDF15	11716665_s_at	0.000684	4.33e-05	-1.20802
C1orf116	11720150_a_at	8.07e-05	2.16e-06	-1.20777
PXDN	11754993_s_at	0.00432	0.000551	-1.20306
GID4	11726410_at	5.33e-07	1.76e-09	-1.19571
SLC48A1	11719813_s_at	8.27e-05	2.28e-06	-1.19304
DCAF12	11718038_s_at	0.000844	5.79e-05	-1.19279
RNF10	11725952_at	0.00063	3.87e-05	-1.19166
CDC34	11716983_at	7.05e-06	6.63e-08	-1.18531
2023-03-03	11725738_at	1.48e-05	1.91e-07	-1.1843
DCAF10	11724600_a_at	6.21e-05	1.48e-06	-1.18304
KIF26A	11729429_a_at	0.000466	2.54e-05	-1.18161
OPTN	11757341_s_at	4.88e-07	1.52e-09	-1.17819
PIP4K2A	11739347_a_at	0.00247	0.000255	-1.17745
ARHGEF37	11756078_a_at	4.06e-05	7.86e-07	-1.17387
NME4	11754486_a_at	1.26e-06	5.35e-09	-1.1735
FOXO4	11726863_at	0.000153	5.39e-06	-1.17254
MXD4	11754299_a_at	9.51e-08	1.6e-10	-1.165
MKRN1	11754758_a_at	0.000656	4.08e-05	-1.16499
ELANE	11727965_at	0.025	0.00661	-1.16472
RNF123	11741002_a_at	0.000433	2.31e-05	-1.16122
XPO7	11739121_a_at	3e-05	5.05e-07	-1.15919
NTAN1	11754208_x_at	7.35e-06	7.08e-08	-1.15872
RANBP10	11730832_at	2.44e-05	3.84e-07	-1.15871
FKBP1B	11723839_a_at	0.00041	2.12e-05	-1.15821
FAM83A	11729571_a_at	2.34e-05	3.61e-07	-1.1556
SESN3	11731901_a_at	0.0184	0.00427	-1.15468
STRADB	11726264_s_at	0.00785	0.00128	-1.15275
CMAS	11716699_a_at	3.26e-08	3.58e-11	-1.15085
PLEK2	11721345_at	0.00963	0.00172	-1.14598
H1F0	11718484_s_at	0.000156	5.55e-06	-1.13862
C6orf106	11717122_s_at	9.07e-06	9.71e-08	-1.13706
DNAJA4	11718617_a_at	0.000226	9.27e-06	-1.13501
KEL	11726225_at	0.00338	0.000393	-1.12971
TSPO2	11737398_a_at	5.9e-05	1.35e-06	-1.12941
LRRC2	11741749_x_at	5.61e-05	1.26e-06	-1.12843
IFRD2	11755876_a_at	3.3e-09	1.34e-12	-1.12812
FHL2	11756134_a_at	1.22e-05	1.43e-07	-1.12693
AGO2	11754098_a_at	8.27e-06	8.62e-08	-1.12662
TERF2IP	11757968_s_at	6.65e-07	2.39e-09	-1.12307
ELOF1	11721400_a_at	1.23e-05	1.45e-07	-1.12185
ST13	11757746_s_at	2.82e-07	6.88e-10	-1.12051
S100A16	11747298_a_at	0.0337	0.0103	-1.11268
FAM117A	11719147_at	1.56e-07	2.94e-10	-1.11211
GATA1	11731814_at	0.00302	0.000335	-1.11187
ACP5	11717981_a_at	0.000518	2.96e-05	-1.10355
OLFM4	11718131_a_at	0.0469	0.0165	-1.10142
LRRC75A	11726209_a_at	4.95e-05	1.05e-06	-1.09931
HBM	11734287_at	0.00571	0.000816	-1.09835
FBXL4	11728800_s_at	4.7e-08	6.52e-11	-1.09666
PA2G4	11723412_s_at	1.38e-05	1.73e-07	-1.09641
TMEM200B	11725611_a_at	4.62e-06	3.41e-08	-1.09626
STK11	11735699_x_at	1.34e-07	2.35e-10	-1.0958
MYH10	11754984_s_at	0.00791	0.00129	-1.09244
CYSTM1	11716580_s_at	0.00338	0.000392	-1.08892
CRISP3	11725310_at	0.0192	0.00453	-1.08844
FIS1	11723286_a_at	4.92e-06	3.87e-08	-1.08771
NCOA4	11758053_s_at	1.49e-05	1.93e-07	-1.08563
FUNDC2	11720821_x_at	2.44e-05	3.84e-07	-1.08123
CYB5A	11753740_x_at	1.9e-06	9.48e-09	-1.07791
ERG	11728373_a_at	0.0158	0.00342	-1.07212
AIDA	11745738_s_at	4e-06	2.82e-08	-1.06926
DPEP1	11756343_a_at	0.00321	0.000364	-1.06661
PINK1	11726996_at	0.000297	1.33e-05	-1.06341
CEACAM6	11729155_at	0.0479	0.017	-1.06099
NPRL3	11724496_a_at	0.000449	2.42e-05	-1.0604
MCOLN1	11718554_a_at	0.000109	3.31e-06	-1.05972
ZFAND5	11736120_s_at	5.65e-05	1.28e-06	-1.05805
SUDS3	11721518_at	0.000151	5.28e-06	-1.05749
DDI2	11759450_x_at	5.63e-06	4.7e-08	-1.05466
AKT2	11749525_a_at	0.00456	0.000594	-1.05295
KHDRBS3	11744581_a_at	0.0233	0.00599	-1.05039
PPP3CB	11760342_a_at	1.17e-06	4.88e-09	-1.04304
PPP3R1	11747093_a_at	3.1e-05	5.26e-07	-1.04084
CDKN2C	11743051_s_at	3.81e-05	7.2e-07	-1.03663
GREM1	11758229_s_at	0.0241	0.00627	-1.03524
ENSA	11758186_s_at	2.09e-06	1.12e-08	-1.03185
UBXN6	11738859_s_at	0.00797	0.00131	-1.02971
NEURL1B	11718464_s_at	0.011	0.00207	-1.02633
FBXO9	11741750_a_at	0.00185	0.000171	-1.0239
MPO	11727443_at	0.0121	0.00237	-1.02365
FRMD4A	11724284_at	0.0029	0.000316	-1.01756
DPM2	11717200_a_at	0.001	7.35e-05	-1.01095
HBQ1	11735475_at	0.0127	0.00253	-1.01074
MAPK1	11715842_a_at	6.11e-06	5.24e-08	-1.01051
TK1	11718127_at	0.00012	3.82e-06	-1.01048
RGCC	11717582_a_at	0.000106	3.2e-06	-1.01027
CNPPD1	11753894_a_at	4.74e-05	9.78e-07	-1.00655
YBX3	11729632_a_at	0.000278	1.22e-05	-1.00254
WASF2	11716244_s_at	1.53e-05	1.98e-07	-1.00179
HAGH	11717501_a_at	0.0025	0.000259	-1.00158
CETN2	11731436_at	2.82e-07	6.83e-10	-1.00157
ASXL1	11759778_at	8.56e-05	2.38e-06	-1.00059
RBX1	11716335_x_at	1.25e-05	1.48e-07	-0.99692
UBE2O	11743992_at	0.000127	4.09e-06	-0.99626
FAM20B	11717971_s_at	5.59e-06	4.66e-08	-0.994857
RAB13	11753979_s_at	0.00582	0.000839	-0.990058
MICAL3	11745597_a_at	2.33e-05	3.56e-07	-0.98864
ADIPOR1	11753175_a_at	0.00242	0.000248	-0.988589
PGM2L1	11724776_at	2.66e-05	4.32e-07	-0.986257
SLC6A19	11722781_at	0.000972	7.02e-05	-0.985161
LCN2	11757634_a_at	0.0439	0.015	-0.982918
NAPA	11744824_a_at	0.000473	2.6e-05	-0.982454
CCNDBP1	11716701_a_at	2.09e-06	1.12e-08	-0.982145
LTF	11755996_s_at	0.0405	0.0134	-0.980957
ZDHHC2	11721530_at	0.00123	9.78e-05	-0.979925
MPC2	11758755_at	4.16e-06	2.99e-08	-0.977579
UBQLN1	11737138_a_at	3.32e-06	2.12e-08	-0.969364
SERPINB10	11732971_at	0.00837	0.0014	-0.967822
SERPINE1	11757312_x_at	0.00143	0.000121	-0.967192
TANGO2	11736219_a_at	0.000758	4.97e-05	-0.964435
C12orf29	11727525_a_at	9.98e-06	1.11e-07	-0.96347
DYNLL1	11753833_a_at	2.09e-06	1.12e-08	-0.962755
ZNF346	11749925_a_at	1.27e-05	1.53e-07	-0.962365
CHP1	11756650_a_at	1.54e-05	2e-07	-0.961937
ZMAT2	11743404_at	0.000127	4.11e-06	-0.959337
TOP1	11717437_x_at	2.09e-05	3.06e-07	-0.958325
NET1	11718576_s_at	0.00228	0.00023	-0.95614
CD177	11730764_a_at	0.014	0.0029	-0.955251
PTPRD	11721790_s_at	0.0235	0.00605	-0.950325
EIF1B	11754107_a_at	1.68e-06	8.23e-09	-0.949681
SERPINI1	11721902_a_at	2.42e-05	3.79e-07	-0.949239
BABAM1	11748858_a_at	2.31e-05	3.53e-07	-0.948308
FEM1B	11734988_s_at	0.00214	0.000211	-0.945832
TAL1	11725898_s_at	0.000382	1.91e-05	-0.943794
NRIP3	11728221_at	0.000299	1.35e-05	-0.94167
SFRP2	11720607_a_at	0.007	0.00109	-0.940721
MICAL2	11761440_a_at	0.00887	0.00153	-0.938536
UBE2V1	11753660_x_at	1.65e-06	7.82e-09	-0.93756
VAT1L	11723332_at	0.0163	0.00358	-0.935241
ENDOD1	11757845_s_at	1.85e-05	2.58e-07	-0.924636
MCUR1	11725452_at	9.12e-05	2.59e-06	-0.922324
PSD3	11745940_a_at	0.0293	0.00836	-0.921678
LAPTM4B	11715381_a_at	0.000833	5.68e-05	-0.920322
RILP	11720140_at	0.000593	3.56e-05	-0.917148
PPP2R5B	11719874_a_at	0.000418	2.19e-05	-0.915515
AMFR	11756087_a_at	0.000589	3.52e-05	-0.912749
B4GALT3	11716856_a_at	0.000158	5.62e-06	-0.912641
TFRC	11715477_at	7.83e-05	2.05e-06	-0.911329
PPME1	11744165_a_at	8.58e-06	9.02e-08	-0.909477
FURIN	11716282_s_at	0.00015	5.23e-06	-0.908047
MYL4	11720703_at	0.0397	0.013	-0.908018
2023-03-02	11740300_x_at	0.00656	0.000992	-0.907847
RNF187	11730196_at	0.000113	3.5e-06	-0.905426
TUBG1	11715791_at	2.97e-05	4.98e-07	-0.902867
TAB3	11746378_a_at	6.13e-05	1.45e-06	-0.900189
UBE2M	11722192_s_at	3.95e-06	2.75e-08	-0.900129
ATP6V1D	11720627_a_at	1.79e-06	8.8e-09	-0.898214
AP2M1	11749846_x_at	0.000132	4.33e-06	-0.897258
TTC39A	11744307_a_at	0.000105	3.15e-06	-0.894597
TBC1D22B	11728079_a_at	4.8e-06	3.66e-08	-0.894494
ERMAP	11730313_a_at	0.00025	1.07e-05	-0.894104
RGS6	11729485_a_at	0.00339	0.000394	-0.890813
UHRF1	11723192_a_at	0.0405	0.0134	-0.890687
RAG2	11739630_at	0.00193	0.000182	-0.890156
RRAGB	11732261_a_at	1.08e-05	1.24e-07	-0.889239
SVBP	11744908_a_at	3.69e-05	6.9e-07	-0.889141
CDK8	11745882_s_at	1.74e-05	2.36e-07	-0.889061
MFHAS1	11739395_a_at	0.00023	9.51e-06	-0.887033
LZTFL1	11743772_a_at	0.0002	7.9e-06	-0.886861
SWT1	11741160_a_at	6.88e-06	6.39e-08	-0.875093
PFDN4	11720950_at	0.0303	0.00877	-0.873149
MAP2K3	11742801_a_at	0.00202	0.000196	-0.872522
RASD1	11716839_a_at	0.00144	0.000123	-0.872178
ID1	11716196_x_at	0.00334	0.000385	-0.871493
VPREB1	11735808_at	0.0435	0.0148	-0.871152
DCAF11	11732151_a_at	7.23e-06	6.9e-08	-0.870725
PCDH1	11719230_at	0.000498	2.79e-05	-0.869035
THOC7	11719380_a_at	1.46e-05	1.86e-07	-0.868663
AK1	11716268_at	0.00442	0.000569	-0.868364
FHL1	11753338_x_at	0.0182	0.00421	-0.867042
ABCB10	11724634_s_at	3.59e-05	6.61e-07	-0.865595
ACKR1	11757035_a_at	0.00101	7.48e-05	-0.860883
FAHD1	11724527_x_at	0.000103	3.09e-06	-0.860262
AGBL5	11718449_a_at	0.000454	2.46e-05	-0.859945
ADCY6	11716725_a_at	0.00165	0.000147	-0.85848
EIF5A2	11729833_at	0.000726	4.68e-05	-0.853504
MBOAT2	11751377_a_at	0.00276	0.000295	-0.852292
TMEM63B	11756926_x_at	0.000532	3.06e-05	-0.851564
FZR1	11724897_a_at	0.000228	9.38e-06	-0.848566
TPBG	11719118_a_at	0.0148	0.00313	-0.848434
AKT1S1	11754679_a_at	0.00016	5.74e-06	-0.846605
CDC27	11743401_x_at	0.00112	8.63e-05	-0.845183
EGFL7	11744394_x_at	0.00178	0.000162	-0.844321
PHOSPHO1	11740244_a_at	0.0125	0.00248	-0.844158
CD55	11760294_a_at	0.009	0.00156	-0.843801
SMIM10	11754398_at	0.0336	0.0102	-0.842884
SLC16A1	11718656_at	0.000113	3.5e-06	-0.841703
HEXIM1	11721002_s_at	1.77e-05	2.42e-07	-0.841033
NAPG	11751473_a_at	4.66e-06	3.49e-08	-0.840175
TXNRD2	11760368_x_at	0.00634	0.000943	-0.838381
RAP2A	11719403_a_at	6.78e-06	6.25e-08	-0.837727
GCAT	11721325_a_at	1.71e-05	2.3e-07	-0.835975
DOHH	11729789_at	3.72e-06	2.54e-08	-0.835706
TMEM14B	11721836_x_at	0.000357	1.73e-05	-0.835679
BCL2L13	11749886_a_at	0.00119	9.32e-05	-0.829883
LYL1	11723346_at	0.00234	0.000238	-0.829113
BEX1	11719475_a_at	0.00141	0.000118	-0.827937
GNAI1	11722803_s_at	0.00556	0.000786	-0.827651
PPM1A	11720673_a_at	0.00128	0.000104	-0.826959
DCAF6	11743648_a_at	0.000348	1.67e-05	-0.826261
YIPF2	11744514_a_at	5.31e-05	1.16e-06	-0.825028
RAB6A	11747778_x_at	0.000145	5e-06	-0.823785
WDR59	11754255_a_at	1.34e-05	1.68e-07	-0.823556
FAH	11717400_a_at	0.00018	6.83e-06	-0.822194
NRN1	11718539_a_at	0.00311	0.000349	-0.821281
SMIM6	11757097_s_at	0.00139	0.000116	-0.820355
CTSE	11743162_a_at	0.0294	0.00839	-0.819793
NUDT1	11757372_a_at	2.31e-05	3.52e-07	-0.81926
OPA1	11743529_a_at	0.000265	1.15e-05	-0.818334
CSRP2	11729238_a_at	0.00406	0.000505	-0.818033
KCNK12	11728980_at	0.00264	0.00028	-0.817442
GID8	11717043_at	7.35e-06	7.08e-08	-0.817247
SOX4	11719563_a_at	0.00211	0.000206	-0.814817
B4GALNT1	11748562_a_at	0.00175	0.000159	-0.813963
TMEM236	11758287_s_at	0.0337	0.0103	-0.812965
BOLA3	11728425_s_at	3.84e-05	7.26e-07	-0.811923
EPM2A	11726414_a_at	0.000151	5.3e-06	-0.810735
IFT52	11750065_a_at	9.98e-06	1.11e-07	-0.806055
PLSCR4	11741315_a_at	0.000222	9.06e-06	-0.805596
E2F1	11723713_at	0.00224	0.000224	-0.805049
GNA12	11751417_a_at	0.00115	8.96e-05	-0.804784
PPP1CB	11725615_a_at	8.64e-05	2.41e-06	-0.804346
SRGAP2	11719438_at	0.000135	4.46e-06	-0.804131
PRSS57	11737470_at	0.00392	0.000482	-0.803472
BAALC	11720817_a_at	0.0414	0.0138	-0.803453
CYYR1	11722504_at	0.0087	0.00148	-0.801514
CIZ1	11757804_x_at	0.00011	3.35e-06	-0.799604
ARTN	11737223_a_at	4.13e-05	8.08e-07	-0.798386
SKP1	11715418_x_at	5.58e-07	1.88e-09	-0.796229
CDKN3	11730821_x_at	0.00193	0.000182	-0.793991
CLPX	11763746_a_at	0.0018	0.000165	-0.792275
ZNF653	11727755_a_at	6.63e-05	1.6e-06	-0.791054
CEP70	11720098_a_at	0.0261	0.00711	-0.790998
RPS14	11725714_a_at	7.84e-05	2.06e-06	-0.790271
C1QTNF4	11728046_at	0.00714	0.00112	-0.787574
SLC25A37	11759559_at	0.0162	0.00356	-0.785624
CD109	11717658_at	0.0317	0.0094	-0.785589
LGALS3	11725937_a_at	0.00139	0.000116	-0.78553
EIF5	11758020_s_at	7.63e-05	1.96e-06	-0.785501
P4HA2	11717118_a_at	0.00517	0.000711	-0.785499
C11orf96	11719899_at	8.12e-05	2.19e-06	-0.78251
GLUL	11740995_x_at	0.00104	7.73e-05	-0.782376
TTC25	11732022_a_at	0.000866	5.99e-05	-0.781719
EIF3J	11725637_a_at	0.000286	1.27e-05	-0.780411
DNAJC12	11715165_at	0.0108	0.00202	-0.779925
HBE1	11753714_a_at	0.000849	5.83e-05	-0.776923
LCN6	11732871_a_at	0.00211	0.000207	-0.775151
CD59	11757306_s_at	0.000396	2.01e-05	-0.775032
CLEC14A	11743696_at	0.00244	0.000251	-0.773972
HIPK1	11744804_a_at	0.000392	1.99e-05	-0.77339
ASNA1	11749739_a_at	1.22e-05	1.44e-07	-0.773212
R3HDM4	11718228_a_at	0.00403	0.000501	-0.770305
SSX2IP	11738142_a_at	0.000384	1.92e-05	-0.769283
LSM12	11751760_s_at	5.94e-08	8.67e-11	-0.768376
PPT2	11736995_a_at	6.13e-06	5.32e-08	-0.768256
LEPR	11726871_s_at	0.000672	4.22e-05	-0.767866
PRTN3	11734171_at	9.28e-05	2.66e-06	-0.767571
TBC1D20	11728739_a_at	0.000852	5.86e-05	-0.767535
MYB	11730483_a_at	0.0139	0.00285	-0.767345
PRG2	11716090_a_at	0.0436	0.0149	-0.767017
KDM7A	11753717_a_at	0.000133	4.37e-06	-0.765954
CDK1	11726617_s_at	0.00709	0.00111	-0.765403
DAP	11715438_at	6.93e-06	6.48e-08	-0.765313
PANK3	11727545_at	0.000592	3.55e-05	-0.764459
RPL41	11721113_x_at	0.00434	0.000555	-0.764405
SERPINB3	11729692_a_at	0.00155	0.000135	-0.763445
KCNMA1	11720280_at	0.0148	0.00312	-0.762946
UGT3A2	11729723_a_at	0.00292	0.00032	-0.762497
GUCD1	11717000_s_at	0.000568	3.35e-05	-0.761668
ITGA9	11759494_at	0.0248	0.00656	-0.760867
CLEC11A	11716922_x_at	6.19e-05	1.47e-06	-0.760844
APOBEC2	11748860_a_at	0.000341	1.63e-05	-0.759479
ZNF428	11758109_s_at	3.17e-05	5.44e-07	-0.756559
CPEB4	11739733_a_at	0.00349	0.000409	-0.756394
SIRT3	11739811_a_at	0.000315	1.45e-05	-0.755806
ZRANB1	11727499_s_at	0.000384	1.92e-05	-0.75556
STOML2	11756722_a_at	4.87e-06	3.74e-08	-0.754199
MICALCL	11737413_at	0.00831	0.00139	-0.753217
PCMTD1	11718736_a_at	3.69e-05	6.91e-07	-0.75222
TSC1	11739935_a_at	0.000281	1.24e-05	-0.75026
UQCRB	11716469_x_at	0.0498	0.018	-0.750108
WDR45	11728227_a_at	0.00346	0.000405	-0.748724
CTDSP2	11756729_a_at	0.00177	0.000161	-0.748635
TOP2A	11720970_at	0.0228	0.00583	-0.74747
IFT22	11741365_x_at	9.51e-05	2.76e-06	-0.747109
MCM4	11743692_a_at	0.00584	0.000844	-0.74664
TNPO1	11716621_a_at	2.73e-05	4.49e-07	-0.745687
TROAP	11731991_at	0.0122	0.0024	-0.745177
CLPB	11720195_a_at	9.98e-06	1.11e-07	-0.744959
DCK	11749894_a_at	0.000396	2.01e-05	-0.744915
SPECC1	11756758_x_at	0.00203	0.000197	-0.744249
FAM122A	11728317_a_at	2.62e-06	1.54e-08	-0.743921
MFSD2B	11742132_a_at	0.000143	4.92e-06	-0.742722
TMEM121	11736558_at	0.000137	4.6e-06	-0.74264
MND1	11742890_at	0.0256	0.00687	-0.742633
DENND4A	11736710_a_at	2.03e-06	1.05e-08	-0.741826
BCAT1	11749895_a_at	0.000185	7.13e-06	-0.740686
BMPR1B	11728085_s_at	0.0249	0.00658	-0.738752
SPAG6	11719651_a_at	0.000547	3.18e-05	-0.73765
RPL35A	11759540_a_at	2.06e-05	3e-07	-0.737462
EFEMP1	11758108_s_at	0.0489	0.0175	-0.737416
CARHSP1	11720511_a_at	7.81e-07	2.95e-09	-0.736992
NATD1	11723885_at	0.0101	0.00183	-0.736383
ZDHHC3	11728773_a_at	0.000965	6.95e-05	-0.735516
SLC7A1	11722413_a_at	0.000517	2.94e-05	-0.735425
MPPED2	11721224_at	0.00618	0.000912	-0.735234
DCTN4	11718742_s_at	0.00305	0.00034	-0.733663
PIK3R2	11744004_at	0.000325	1.52e-05	-0.733296
FNBP1L	11717552_s_at	3.87e-05	7.35e-07	-0.732753
SHANK3	11723370_s_at	0.00873	0.00149	-0.731609
FEM1A	11716867_at	0.000409	2.12e-05	-0.730748
FZD6	11749125_a_at	0.0292	0.00833	-0.729806
CENPU	11744789_a_at	0.0215	0.00536	-0.728612
ANKLE1	11740178_x_at	0.00507	0.000691	-0.727819
BSPRY	11721412_a_at	0.00116	8.98e-05	-0.726501
MYO1B	11743546_a_at	0.00287	0.000312	-0.7262
LNX2	11724440_at	1.67e-05	2.22e-07	-0.722929
ECSIT	11718417_a_at	0.000138	4.62e-06	-0.722226
ENAH	11722842_s_at	0.0413	0.0137	-0.721608
ATG14	11725487_at	0.00186	0.000173	-0.721482
BLVRB	11756756_a_at	0.0104	0.00191	-0.721114
SLC6A9	11737326_a_at	0.000876	6.09e-05	-0.72023
MAF1	11715633_x_at	0.000286	1.27e-05	-0.719059
CDT1	11721668_at	0.000733	4.74e-05	-0.718063
SLC22A23	11743548_a_at	0.000241	1.02e-05	-0.717603
UBALD1	11720883_a_at	0.000599	3.61e-05	-0.716038
NEIL2	11723394_s_at	6.21e-05	1.48e-06	-0.714917
ITSN1	11736141_a_at	0.00321	0.000364	-0.714205
DNAJB4	11759287_at	0.00257	0.000268	-0.714113
ODC1	11752515_a_at	0.000753	4.92e-05	-0.712767
CA3	11751534_a_at	0.000893	6.26e-05	-0.71198
FBXO7	11739400_s_at	0.0157	0.00338	-0.710496
MORN4	11759662_at	0.000521	2.98e-05	-0.709173
TBPL1	11721285_a_at	4.71e-06	3.56e-08	-0.708885
BRD4	11743990_at	0.000661	4.12e-05	-0.708539
TCEA1	11734918_s_at	0.000618	3.78e-05	-0.707465
TXN	11715469_s_at	0.000116	3.62e-06	-0.707053
NAP1L4	11747507_x_at	3.67e-06	2.46e-08	-0.706701
C5	11737948_a_at	0.00107	8.15e-05	-0.704751
MSMO1	11741012_a_at	0.000335	1.59e-05	-0.704386
AP2S1	11716611_x_at	0.000414	2.15e-05	-0.70219
TM7SF2	11748279_s_at	0.000114	3.55e-06	-0.701631
ARHGAP23	11722305_at	0.000203	8.07e-06	-0.700792
TPX2	11750598_s_at	0.0175	0.00399	-0.700189
RPS27A	11741791_at	0.00224	0.000224	-0.700117
SLC43A1	11744921_a_at	6.07e-05	1.42e-06	-0.69904
BAG1	11716127_a_at	0.0355	0.011	-0.698875
NUP98	11731268_a_at	0.000433	2.3e-05	-0.698797
RSRC1	11715252_at	0.000742	4.81e-05	-0.69841
TPRG1L	11724582_a_at	0.000188	7.28e-06	-0.697918
ECM1	11748525_a_at	0.0032	0.000362	-0.69704
HR	11725150_s_at	0.00234	0.000237	-0.693699
METTL9	11720766_a_at	7.49e-05	1.89e-06	-0.692646
UBAP1	11747930_x_at	8.9e-05	2.51e-06	-0.691822
LANCL3	11735483_at	0.00013	4.27e-06	-0.689879
POLL	11748194_a_at	0.00488	0.000656	-0.688185
CAT	11732147_a_at	0.00853	0.00144	-0.686733
NAA30	11746938_a_at	0.00103	7.65e-05	-0.68399
TMEM217	11732820_a_at	0.00227	0.000228	-0.682516
LRRC28	11744753_a_at	0.000326	1.53e-05	-0.681667
CD34	11718658_s_at	0.00429	0.000547	-0.681194
CRISP2	11715248_s_at	0.00132	0.000108	-0.679835
SNX22	11745373_a_at	0.00272	0.00029	-0.67931
RFNG	11747962_a_at	1.78e-05	2.44e-07	-0.67902
MINPP1	11720091_a_at	0.000192	7.48e-06	-0.677973
PPOX	11722712_x_at	0.000348	1.67e-05	-0.676819
COPS2	11724191_a_at	0.0155	0.00332	-0.675267
SHISA7	11728090_at	0.0178	0.00406	-0.674871
TMC5	11763530_a_at	0.00193	0.000182	-0.674734
GPSM1	11719762_a_at	0.000243	1.03e-05	-0.673748
ICAM4	11741590_x_at	0.00174	0.000158	-0.671339
C12orf10	11721676_a_at	7.33e-06	7.02e-08	-0.671289
POP7	11757488_a_at	0.000136	4.52e-06	-0.67106
GAPVD1	11746976_a_at	0.000102	3.03e-06	-0.67012
OAT	11757997_s_at	0.00156	0.000137	-0.670001
MT1G	11717386_s_at	0.000109	3.31e-06	-0.669679
CUL4A	11743766_a_at	8.55e-05	2.38e-06	-0.669565
RAG1	11737830_at	0.0263	0.00718	-0.668861
FST	11724032_a_at	0.00526	0.000727	-0.668442
ATG9A	11716830_a_at	0.000482	2.67e-05	-0.667735
METTL22	11726315_a_at	2.64e-05	4.27e-07	-0.667667
RALBP1	11743527_x_at	0.00215	0.000212	-0.667022
SLC22A16	11754703_a_at	0.00497	0.000673	-0.666431
DHX29	11717857_a_at	7.42e-05	1.87e-06	-0.665181
ATG4D	11746221_a_at	1.57e-05	2.06e-07	-0.665132
HIST1H3H	11759076_at	0.000825	5.6e-05	-0.66483
BIRC2	11750887_a_at	0.00245	0.000252	-0.664813
ATF5	11717801_a_at	0.0266	0.0073	-0.664797
MYO18B	11755551_a_at	0.00114	8.77e-05	-0.663719
KRT18	11754941_x_at	0.0468	0.0164	-0.663071
CDC25A	11726757_s_at	0.00117	9.1e-05	-0.66268
LRRC8A	11729413_a_at	0.000673	4.23e-05	-0.660637
MLLT3	11747870_a_at	0.0181	0.00415	-0.657922
PACSIN3	11719970_a_at	5.66e-05	1.28e-06	-0.657624
CDIPT	11754080_x_at	2e-05	2.89e-07	-0.655726
PDCD10	11756562_a_at	0.00749	0.0012	-0.655662
FRMD4B	11731573_a_at	0.0212	0.00524	-0.655523
PDZD8	11726386_at	0.0026	0.000273	-0.654913
WIPI2	11735137_a_at	0.00027	1.18e-05	-0.654638
CAPN12	11755990_a_at	0.00135	0.000111	-0.654217
GOLPH3L	11721481_at	1.04e-05	1.18e-07	-0.654127
TUBB4B	11750415_x_at	2.35e-05	3.64e-07	-0.653397
RCOR3	11743896_at	0.000124	3.98e-06	-0.65317
UBE2S	11719849_s_at	0.000305	1.38e-05	-0.652915
RBFOX2	11716254_s_at	0.0219	0.00549	-0.652299
SLC23A1	11726330_a_at	0.0066	0.001	-0.650812
SKAP2	11763104_at	0.00174	0.000157	-0.650776
COL17A1	11726565_at	0.0238	0.00616	-0.649105
ZDHHC19	11729091_a_at	0.0121	0.00236	-0.648913
FERMT1	11755613_a_at	0.0357	0.0111	-0.648833
AQP7	11744941_a_at	0.0062	0.000915	-0.648808
TESC	11720372_at	0.0471	0.0166	-0.646199
LOX	11728201_at	0.0135	0.00273	-0.645367
TMEM245	11718676_x_at	0.00047	2.57e-05	-0.644973
FERMT2	11718181_s_at	0.03	0.00868	-0.644848
OSBPL6	11750599_a_at	0.00693	0.00108	-0.642299
TRDMT1	11760692_at	0.00276	0.000296	-0.642284
TCEANC	11740837_a_at	0.00989	0.00178	-0.641649
CYTL1	11723070_a_at	0.000223	9.07e-06	-0.641437
GHITM	11727779_at	7.92e-05	2.09e-06	-0.641375
CD80	11753503_a_at	0.000541	3.13e-05	-0.641306
ZNF592	11731523_s_at	0.00137	0.000113	-0.639874
BAG6	11727634_x_at	0.0026	0.000273	-0.639335
RSU1	11747534_a_at	0.000313	1.44e-05	-0.63739
IL2RA	11752775_a_at	0.044	0.0151	-0.6364
SLC25A38	11744515_a_at	8.2e-05	2.24e-06	-0.635969
EMC3	11716729_a_at	0.0228	0.00583	-0.634943
UBXN10	11759102_at	0.000939	6.7e-05	-0.634857
ALAD	11730200_a_at	0.000664	4.15e-05	-0.633233
RGS10	11740375_a_at	0.00695	0.00108	-0.632979
DDB1	11748413_s_at	0.0005	2.81e-05	-0.631462
SNX15	11745593_x_at	0.000145	5.03e-06	-0.630187
CPXM1	11723714_a_at	0.00192	0.00018	-0.629292
TMEM14C	11715635_x_at	0.0233	0.00601	-0.628838
WBP2	11752981_x_at	0.00536	0.000746	-0.628665
GRINA	11716483_x_at	0.0166	0.00368	-0.628421
DENND1A	11755028_a_at	0.0022	0.000218	-0.62799
USP32	11723725_x_at	0.00796	0.00131	-0.627167
CHD2	11730657_a_at	9.93e-05	2.92e-06	-0.626337
STK32B	11752483_a_at	0.000388	1.95e-05	-0.624371
MAMLD1	11755364_a_at	6.69e-05	1.62e-06	-0.623354
SH3GLB2	11745311_a_at	0.00284	0.000308	-0.622983
SHARPIN	11744686_a_at	0.00514	0.000704	-0.622542
NDUFAF3	11718411_a_at	9.31e-06	1.01e-07	-0.621425
NUTF2	11727432_a_at	5.13e-06	4.08e-08	-0.620685
SORBS1	11725742_a_at	0.00105	7.85e-05	-0.620661
CRIPT	11730761_s_at	0.000732	4.73e-05	-0.620186
HJURP	11743160_a_at	2.69e-05	4.38e-07	-0.618104
PSMD9	11730205_at	1.03e-05	1.15e-07	-0.617851
MAP2K7	11723595_s_at	0.000219	8.9e-06	-0.617179
ARMC8	11733929_a_at	0.000187	7.19e-06	-0.616507
C2CD2	11760786_at	0.00039	1.97e-05	-0.615008
ORMDL3	11736189_a_at	0.00144	0.000122	-0.614581
APOL4	11746175_a_at	0.0299	0.00861	-0.614435
SPRY2	11753988_a_at	0.015	0.00318	-0.613063
CDK16	11722021_a_at	0.00267	0.000284	-0.612347
KPNA6	11723267_a_at	7.84e-06	7.87e-08	-0.611703
C3orf52	11724431_at	0.00824	0.00137	-0.610461
MLLT1	11763626_a_at	0.0118	0.00229	-0.609694
LTBP2	11720528_at	0.0235	0.00607	-0.608679
NPDC1	11744205_x_at	0.0247	0.00651	-0.607948
ST6GALNAC6	11718363_a_at	5.75e-05	1.31e-06	-0.607142
ITGA2	11743617_at	0.000143	4.88e-06	-0.60563
FARP1	11719702_a_at	0.00815	0.00135	-0.604103
MARK3	11725990_a_at	0.000555	3.25e-05	-0.602979
SLC27A2	11718213_a_at	0.0337	0.0103	-0.602754
RXRA	11742843_a_at	0.0325	0.00972	-0.601739
BTF3	11737409_x_at	0.00313	0.000353	-0.599105
AMOTL1	11725706_s_at	0.00654	0.000988	-0.598756
RAI14	11716775_a_at	0.0171	0.00382	-0.598529
CD2AP	11724033_s_at	0.0195	0.00465	-0.598518
RAVER2	11727516_at	0.00498	0.000674	-0.59775
GUK1	200075_PM_s_at	0.0103	0.00187	-0.597713
TIMM23	11720070_s_at	4.47e-05	9.08e-07	-0.59768
MLH1	11760865_at	0.000568	3.35e-05	-0.597649
NRP2	11733332_at	0.0294	0.00842	-0.597516
ITGA7	11718243_a_at	0.00662	0.00101	-0.597496
UBALD2	11744085_at	8.24e-05	2.26e-06	-0.597101
BACE2	11758486_s_at	0.0162	0.00354	-0.596773
GPX1	11725346_x_at	0.00193	0.000182	-0.594205
COPS3	11757601_a_at	7.32e-05	1.84e-06	-0.593942
SLC2A4	11734132_x_at	0.00572	0.00082	-0.593848
UBAC1	11732402_a_at	3.7e-05	6.95e-07	-0.592498
ASCC2	11717449_a_at	0.0441	0.0151	-0.591705
CARM1	11754363_s_at	0.0489	0.0175	-0.591543
CDC45	11719699_a_at	0.00533	0.000739	-0.590807
APOO	11726662_a_at	0.000103	3.07e-06	-0.590219
ENTPD8	11740699_a_at	0.00441	0.000568	-0.589508
ZFAND3	11756864_a_at	0.00117	9.09e-05	-0.58903
PXMP2	11723313_s_at	0.00144	0.000122	-0.589003
UCP2	11729160_x_at	0.00276	0.000296	-0.588401
CXCL12	11718743_a_at	0.00533	0.00074	-0.588051
TCF19	11724026_a_at	0.00226	0.000226	-0.587823
AJUBA	11745543_x_at	0.0149	0.00315	-0.587093
CRH	11732221_at	0.00276	0.000296	-0.586499
MAP1B	11744047_a_at	0.0199	0.00479	-0.585907
MCAM	11724459_x_at	0.000484	2.7e-05	-0.585105
TARS	11716789_s_at	0.00454	0.000591	-0.584298
INPP5K	11718454_a_at	0.00112	8.58e-05	-0.58371
GCNT2	11756855_a_at	0.000226	9.24e-06	-0.5835
GAB1	11741340_a_at	0.0258	0.00696	-0.583476
AMN	11733804_at	0.000215	8.68e-06	-0.583401
SRXN1	11716950_s_at	0.038	0.0122	-0.583066
CD19	11756664_a_at	0.000321	1.49e-05	-0.582555
GDE1	11722795_a_at	0.00127	0.000102	-0.582145
LDLRAD2	11737509_at	0.000719	4.62e-05	-0.581974
TUBB6	11747072_s_at	0.00419	0.000528	-0.581806
SERINC2	11748053_x_at	0.00361	0.000432	-0.58106
HIST1H2AI	11715219_s_at	1.27e-05	1.53e-07	-0.579898
EMP2	11728708_at	0.00385	0.000471	-0.57964
C17orf99	11746550_a_at	0.00305	0.00034	-0.578145
MACROD1	11744227_at	0.00117	9.1e-05	-0.576754
ATP1B2	11726986_at	0.00896	0.00155	-0.576476
GTSF1	11723485_at	0.0205	0.00501	-0.576149
SLC39A8	11724249_a_at	0.00846	0.00142	-0.576137
KCNS3	11722918_a_at	1.84e-05	2.56e-07	-0.57611
PTGR1	11736655_a_at	0.0037	0.000446	-0.57607
SLC35G2	11724122_a_at	0.0134	0.00271	-0.575695
ADGRA3	11755533_a_at	0.0227	0.0058	-0.574742
MANEAL	11751313_a_at	0.000219	8.85e-06	-0.574216
AP2A1	11728299_x_at	0.00478	0.000637	-0.574028
ATAT1	11762166_a_at	0.0171	0.00383	-0.573983
SLC50A1	11745936_a_at	3.26e-05	5.64e-07	-0.573934
SVIP	11730791_at	0.000591	3.53e-05	-0.573647
HECTD3	11749707_a_at	0.000321	1.49e-05	-0.573544
RGS16	11746705_a_at	0.000399	2.04e-05	-0.573088
CRB1	11745535_a_at	0.000603	3.65e-05	-0.572764
ZIC3	11736773_at	0.00865	0.00147	-0.572551
PLA2G4F	11755074_x_at	0.0129	0.00257	-0.571776
SV2A	11719653_at	0.00974	0.00174	-0.570806
MCM10	11736367_a_at	0.00122	9.7e-05	-0.570225
PKD2	11718653_a_at	0.0109	0.00205	-0.568112
TFEB	11747867_s_at	0.00199	0.00019	-0.567901
BIRC5	11733864_a_at	0.0186	0.00436	-0.567516
ATXN3	11726361_a_at	0.00122	9.73e-05	-0.567357
EPS8L2	11760458_at	0.00352	0.000416	-0.567243
ANP32B	11718684_x_at	6.13e-05	1.44e-06	-0.566578
TRIP12	11748813_a_at	0.000783	5.2e-05	-0.566557
RPRML	11737363_at	0.000124	3.99e-06	-0.5665
PLCL2	11725830_a_at	0.00144	0.000122	-0.566058
CA6	11753393_a_at	0.00801	0.00132	-0.565293
SUGT1	11724281_a_at	0.0013	0.000106	-0.565112
TAX1BP1	11718271_a_at	0.00232	0.000235	-0.564758
CENPV	11722721_a_at	0.00576	0.000827	-0.564737
LHPP	11744858_a_at	0.0014	0.000117	-0.564461
LEF1	11726332_a_at	0.000202	7.96e-06	-0.564453
TEX2	11722041_s_at	0.00015	5.26e-06	-0.563972
YPEL3	11721355_a_at	0.00761	0.00123	-0.563948
SEMA6A	11742815_x_at	0.0111	0.0021	-0.563848
DDIT4L	11724796_at	0.00109	8.29e-05	-0.563294
ALG9	11760767_at	0.0206	0.00502	-0.562502
CHEK1	11738250_at	0.00595	0.000865	-0.561295
PSAT1	11742991_a_at	0.0343	0.0105	-0.561266
DDN	11727723_a_at	0.0181	0.00417	-0.561247
NEUROG1	11734348_at	0.00241	0.000246	-0.561118
SEC14L4	11755667_x_at	0.016	0.00348	-0.560729
HTRA3	11721390_at	0.000218	8.83e-06	-0.56015
ZNF423	11750380_a_at	0.009	0.00156	-0.559758
PQLC1	11746101_x_at	0.0011	8.42e-05	-0.559526
DNM1	11720616_a_at	0.00299	0.000331	-0.559355
SLC6A13	11744613_a_at	0.0114	0.00219	-0.558793
B4GALT2	11718714_x_at	0.000272	1.19e-05	-0.558764
IQCF5	11730668_at	0.00114	8.79e-05	-0.558714
FZD5	11721427_at	0.00113	8.67e-05	-0.55867
TMEM150C	11759123_at	0.0163	0.0036	-0.55789
NOVA2	11732638_at	0.00955	0.00169	-0.55726
VGLL1	11744130_a_at	0.0216	0.00536	-0.556007
MYBPC2	11729864_at	0.00495	0.000669	-0.555704
PNPLA2	11730222_x_at	0.00694	0.00108	-0.555553
NUSAP1	11756569_a_at	0.00194	0.000183	-0.555361
CYB5R3	11715555_a_at	0.00234	0.000237	-0.555358
BRF1	11759786_x_at	0.000348	1.66e-05	-0.555215
CDC42BPA	11720289_a_at	0.0149	0.00315	-0.554114
CRADD	11739913_a_at	0.0468	0.0164	-0.553642
GRASP	11728422_a_at	0.000533	3.07e-05	-0.553575
QPRT	11749391_x_at	0.00162	0.000143	-0.55347
AZIN2	11763343_a_at	0.0272	0.00752	-0.552708
PYCR1	11718210_s_at	0.00403	0.000501	-0.55233
PPP5C	11762182_a_at	0.0155	0.00332	-0.552206
HPS4	11720524_a_at	0.00869	0.00148	-0.55131
VAX1	11742464_s_at	0.00352	0.000415	-0.550531
DPF1	11742248_x_at	0.0204	0.00496	-0.550347
SPEM1	11732029_a_at	0.0044	0.000565	-0.549995
SPSB3	11750057_a_at	0.000231	9.56e-06	-0.549001
C11orf58	11723639_s_at	0.000719	4.62e-05	-0.548732
BCL7A	11719907_a_at	0.0144	0.00301	-0.548484
STX18	11718009_a_at	0.000601	3.64e-05	-0.548265
CLEC4M	11749203_x_at	0.00134	0.00011	-0.547669
PDE2A	11754738_a_at	0.00346	0.000405	-0.547486
CABP1	11725817_a_at	0.00565	0.000805	-0.54707
CSDE1	11731482_s_at	0.000128	4.18e-06	-0.546846
JPH1	11725822_a_at	0.00211	0.000206	-0.546704
IBA57	11729911_a_at	0.00137	0.000114	-0.546628
LYG2	11745630_a_at	0.00379	0.000461	-0.545977
ROR1	11752290_s_at	0.0167	0.00371	-0.544406
NELL1	11745324_s_at	0.00215	0.000212	-0.544254
NNMT	11744776_a_at	0.000405	2.09e-05	-0.544104
ACKR2	11731716_at	0.0037	0.000446	-0.543791
SCNN1D	11741299_x_at	0.0035	0.000411	-0.543576
PCSK1N	11717136_x_at	0.00643	0.000965	-0.543325
BCAM	11755939_a_at	0.00414	0.00052	-0.54288
RIMS3	11739664_at	0.00379	0.000461	-0.542831
HIST3H2BB	11732990_x_at	0.0018	0.000165	-0.54271
AEN	11754296_a_at	0.0033	0.000379	-0.542119
RNF26	11739139_s_at	0.000751	4.9e-05	-0.541842
STEAP3	11722678_a_at	0.00883	0.00152	-0.540368
FAM47E	11735523_a_at	0.039	0.0127	-0.539869
AEBP1	11717073_a_at	0.0176	0.00401	-0.539521
AK4	11731833_a_at	0.0201	0.00484	-0.538849
RGMA	11754792_a_at	0.00566	0.000807	-0.538417
IKBKG	11756119_a_at	0.00172	0.000155	-0.538192
KIAA1217	11745387_a_at	0.00342	0.000399	-0.538184
RGS9BP	11740289_at	0.0127	0.00253	-0.537916
RPS6KB2	11747561_s_at	0.0193	0.00457	-0.537774
SZRD1	11716536_a_at	0.000434	2.32e-05	-0.537566
ATP6V0C	11715787_x_at	0.0216	0.00537	-0.537196
UQCR11	11757334_a_at	0.00496	0.00067	-0.536691
AURKA	11718943_a_at	0.00369	0.000444	-0.536657
KATNAL1	11721621_a_at	0.0195	0.00465	-0.535587
BOK	11718629_at	0.00111	8.55e-05	-0.534962
CRIP2	11748141_a_at	0.000614	3.74e-05	-0.534622
NXPH3	11728099_at	0.0141	0.00293	-0.533606
SNX8	11743958_at	0.00139	0.000116	-0.5335
CCDC34	11736167_a_at	0.000825	5.6e-05	-0.533473
NR2F6	11716911_a_at	0.00216	0.000213	-0.533395
MAPK12	11746262_a_at	0.00129	0.000105	-0.533323
PAGE5	11733415_a_at	0.000388	1.95e-05	-0.532964
LRFN4	11722296_at	4.36e-05	8.78e-07	-0.531719
C1QTNF8	11750629_a_at	0.00846	0.00142	-0.531312
CD79B	11761229_at	0.00145	0.000124	-0.530905
DDHD2	11733975_a_at	0.0049	0.00066	-0.530884
SPANXD	11759051_x_at	0.0234	0.00604	-0.530863
MRPS12	11734730_a_at	0.00197	0.000187	-0.529595
FGF3	11742283_at	0.0185	0.0043	-0.529435
CTSB	11754977_x_at	0.0387	0.0125	-0.52924
C4orf45	11740900_a_at	0.00469	0.000619	-0.529193
CDYL	11741967_a_at	0.00418	0.000527	-0.529087
RGL3	11761291_a_at	0.0471	0.0166	-0.529082
AZU1	11731869_a_at	0.0147	0.00308	-0.528967
RASL10A	11730662_a_at	0.00889	0.00153	-0.528123
NFIA	11720852_s_at	0.00102	7.53e-05	-0.527914
GPS2	11747851_a_at	0.000908	6.39e-05	-0.527746
ZWINT	11740253_a_at	0.00722	0.00114	-0.527542
B4GALNT4	11729944_at	0.00858	0.00145	-0.527037
LIPE	11726872_a_at	0.00386	0.000472	-0.526983
EPDR1	11739072_at	0.029	0.00823	-0.526785
LURAP1	11731721_at	0.00613	0.0009	-0.526083
STAU1	11717904_a_at	4.2e-05	8.34e-07	-0.524906
KCTD20	11747244_a_at	0.000139	4.68e-06	-0.524886
UGT2B7	11729137_at	0.00107	8.09e-05	-0.524348
UHMK1	11737181_a_at	0.00346	0.000405	-0.524104
LMCD1	11746719_a_at	0.00164	0.000145	-0.523888
GFI1B	11730082_a_at	0.0131	0.00264	-0.523645
ANGPT2	11742027_a_at	0.0126	0.0025	-0.523568
TMEM9B	11746587_a_at	0.000147	5.11e-06	-0.523522
NRXN2	11735437_a_at	2.34e-05	3.62e-07	-0.523193
DUSP26	11719092_at	0.00174	0.000157	-0.522895
HLA-DPB1	11761306_at	0.00197	0.000188	-0.522829
GLI2	11743688_at	0.0315	0.00929	-0.522829
AQP5	11721531_a_at	0.021	0.00516	-0.522739
SDC3	11739276_at	0.00204	0.000197	-0.522285
HSD3B7	11741502_a_at	0.000498	2.79e-05	-0.521972
SLC25A39	11715517_s_at	0.0313	0.00922	-0.521825
BAHCC1	11742415_a_at	0.000297	1.34e-05	-0.521557
ZC3HAV1	11756839_x_at	0.0317	0.00939	-0.520935
ERAL1	11756662_a_at	0.00048	2.65e-05	-0.520873
TMEM145	11737688_at	0.00887	0.00152	-0.520717
HDLBP	11743459_x_at	0.000842	5.77e-05	-0.520616
KDM8	11753551_a_at	0.00292	0.00032	-0.520398
CKS1B	11716092_x_at	0.0275	0.00768	-0.52037
PLK1	11716726_a_at	0.0027	0.000288	-0.520168
SYT8	11763109_x_at	0.0251	0.00665	-0.519546
MAP3K7	11741475_a_at	0.00215	0.000213	-0.519488
CNTN2	11726789_a_at	0.0169	0.00378	-0.519345
PLXNA4	11735965_a_at	0.00195	0.000185	-0.517857
SNX4	11721447_at	0.0223	0.00565	-0.517812
UMODL1	11754740_a_at	0.0243	0.00636	-0.517747
PAX3	11742286_at	0.00912	0.00159	-0.517165
EXT2	11752434_a_at	0.000124	3.98e-06	-0.51713
SEMA7A	11726571_a_at	0.00956	0.0017	-0.516889
TLX2	11740605_x_at	0.00128	0.000103	-0.516815
NRSN1	11729635_a_at	0.0114	0.00218	-0.516752
ISCU	11757291_s_at	7.86e-05	2.07e-06	-0.516356
EHD2	11746200_s_at	0.0026	0.000273	-0.515993
TRIM36	11731961_s_at	0.0162	0.00356	-0.515872
MED16	11756057_a_at	0.00239	0.000244	-0.515844
ASL	11760562_at	0.000603	3.65e-05	-0.515452
HKDC1	11722520_a_at	0.0107	0.00197	-0.515334
NEK1	11757406_s_at	0.00945	0.00167	-0.51511
RACGAP1	11723583_a_at	0.00143	0.000121	-0.514679
CLCN3	11742798_a_at	0.000698	4.43e-05	-0.514342
LCT	11737029_at	0.0306	0.00889	-0.514257
BGN	11721244_a_at	0.000583	3.46e-05	-0.514172
CHST2	11718908_s_at	0.0152	0.00322	-0.513846
SF3B3	11722175_a_at	0.00647	0.000973	-0.513524
ANO4	11746082_a_at	0.000324	1.51e-05	-0.512415
SCARF2	11721203_at	0.00229	0.00023	-0.512218
COPZ1	11715566_at	0.00011	3.36e-06	-0.511804
UBL7	11733096_a_at	0.00271	0.000289	-0.511698
JAM2	11760419_at	0.00334	0.000386	-0.51087
KIAA1586	11733196_a_at	0.00207	0.000202	-0.510732
STK40	11754293_a_at	0.00673	0.00103	-0.510726
TSPAN17	11744217_a_at	0.00576	0.000828	-0.51045
FAM83F	11750850_a_at	0.014	0.00288	-0.510214
BMP2	11743498_at	0.0275	0.00765	-0.510002
SDE2	11729299_a_at	0.0428	0.0145	-0.509925
INHA	11723157_at	0.00551	0.000777	-0.509799
UBE2C	11733702_x_at	0.0377	0.012	-0.509585
KAZALD1	11729202_at	0.000426	2.25e-05	-0.509574
HSPA12B	11727137_a_at	0.00417	0.000524	-0.509547
KCNN1	11731935_a_at	0.0109	0.00203	-0.509515
PDCD1	11734446_at	0.00688	0.00106	-0.509436
LIF	11758619_s_at	0.00156	0.000137	-0.509401
PANK2	11742767_at	0.0181	0.00416	-0.508679
TNIP1	11744745_a_at	0.0146	0.00306	-0.508445
HAGHL	11727587_x_at	0.000381	1.9e-05	-0.508039
SHBG	11763157_x_at	0.0196	0.00469	-0.507969
AUH	11749988_x_at	0.000994	7.26e-05	-0.507905
RGS12	11746276_s_at	0.00051	2.89e-05	-0.507576
NXNL2	11715332_at	0.0273	0.00759	-0.507529
CCS	11720675_a_at	0.000227	9.3e-06	-0.507489
PADI1	11729333_at	0.0188	0.0044	-0.507432
SAP30	11727476_s_at	0.000221	8.97e-06	-0.507302
TMEM44	11720909_a_at	0.000977	7.08e-05	-0.507066
ACADS	11744183_a_at	1.86e-05	2.63e-07	-0.506824
PTN	11753666_x_at	0.00101	7.48e-05	-0.506755
NAV1	11725411_at	0.0111	0.00211	-0.506739
REEP2	11721847_a_at	0.00794	0.0013	-0.506133
NYX	11741857_a_at	0.00342	0.000399	-0.506058
NTN1	11730467_at	0.000626	3.84e-05	-0.505636
ARHGEF17	11720521_at	0.000921	6.52e-05	-0.505141
DAND5	11755247_x_at	0.00197	0.000187	-0.504754
LHFPL2	11721237_a_at	0.0413	0.0137	-0.504411
PPFIBP1	11734874_x_at	0.0401	0.0132	-0.504217
EFNB1	11715913_s_at	0.00225	0.000226	-0.503858
YPEL1	11756277_a_at	5.3e-05	1.16e-06	-0.503538
LYPD5	11729804_a_at	0.0115	0.00221	-0.503177
SLCO4A1	11743172_a_at	0.00121	9.51e-05	-0.503068
MBD3	11748028_a_at	0.00566	0.000806	-0.50284
RNF40	11758743_at	0.0174	0.00392	-0.502833
SOD1	11756351_x_at	0.00651	0.00098	-0.502631
FUZ	11747568_a_at	0.000457	2.47e-05	-0.502625
TMPO	11764010_a_at	0.0278	0.00777	-0.50241
FJX1	11725155_at	0.009	0.00156	-0.502147
ANKRD2	11726349_a_at	0.0135	0.00273	-0.501697
SEMA4F	11748626_a_at	0.0344	0.0106	-0.501155
NFATC4	11734673_a_at	0.000177	6.63e-06	-0.500583
BMP1	11747545_a_at	0.00362	0.000433	-0.50058
TMEM100	11726787_s_at	0.000232	9.62e-06	-0.500562
CACNB2	11742037_a_at	0.0248	0.00656	-0.500387
MAGEC3	11753360_a_at	0.0105	0.00194	-0.500073
SSR1	11717052_at	0.0127	0.00253	0.500028
NAA16	11756272_a_at	0.0175	0.00397	0.500113
TPR	11727482_a_at	0.0153	0.00326	0.500124
IST1	11750292_x_at	6.76e-05	1.64e-06	0.500127
PITPNC1	11725746_a_at	0.000281	1.24e-05	0.500129
C15orf39	11750917_a_at	0.000905	6.37e-05	0.500147
PPP2R5E	11759025_s_at	0.0379	0.0121	0.500161
TRIM27	11757433_a_at	0.00669	0.00102	0.50021
OXA1L	11715498_a_at	0.00555	0.000785	0.500222
BLOC1S2	11757431_s_at	0.026	0.00705	0.500301
DYNC1LI2	11716010_s_at	0.00637	0.00095	0.500408
SAT2	11720958_a_at	0.000844	5.79e-05	0.50048
LIMS1	11760128_x_at	0.0216	0.00539	0.500522
PURA	11727923_at	0.0142	0.00294	0.500582
BAZ1A	11755058_a_at	0.0201	0.00485	0.50067
TYW1	11717967_x_at	0.00101	7.39e-05	0.500748
VAPA	11743257_x_at	0.00934	0.00164	0.500749
RAB4A	11721301_a_at	0.0134	0.0027	0.501164
EIF3F	11757296_s_at	0.041	0.0136	0.50123
SMG1	11728237_at	0.00858	0.00145	0.501281
REEP5	11750034_a_at	0.0113	0.00215	0.501309
FYCO1	11755818_a_at	0.00252	0.000262	0.501335
RINL	11740971_x_at	0.0106	0.00196	0.501369
CNOT6L	11723183_s_at	0.00305	0.00034	0.501393
PRKD3	11739584_s_at	0.0476	0.0168	0.50145
SLC25A11	11744261_a_at	0.017	0.00379	0.501512
TACC1	11744358_x_at	0.0165	0.00365	0.501561
M6PR	11715828_a_at	0.0139	0.00286	0.501611
ANKRA2	11719418_x_at	0.0254	0.00676	0.501625
ARID3A	11730399_at	0.00667	0.00102	0.501664
TGOLN2	11716902_a_at	0.0142	0.00296	0.501712
MAVS	11727039_at	0.000617	3.77e-05	0.501723
PCF11	11722295_at	0.0172	0.00388	0.501762
RTN4	11719933_x_at	0.0119	0.00231	0.50178
SLC16A6	11735092_x_at	0.0229	0.00587	0.501872
TGFB1	11716385_at	0.00103	7.68e-05	0.501985
NFYC	11724873_x_at	0.00348	0.000409	0.502032
TRAF3	11743501_a_at	0.000372	1.84e-05	0.502151
INTS6	11727520_a_at	0.00384	0.000469	0.502207
AVIL	11738150_a_at	0.0213	0.00527	0.502269
NCSTN	11749182_a_at	0.0157	0.00339	0.502304
C7orf50	11717262_a_at	0.00612	0.000898	0.50234
C6orf203	11725759_a_at	0.0261	0.00709	0.502447
MAPRE1	11715586_at	0.0172	0.00387	0.502594
ZFP36L1	11716115_s_at	0.00573	0.000821	0.502611
KANSL2	11756410_a_at	0.0184	0.00427	0.502637
DZIP3	11732286_a_at	0.0141	0.00292	0.502684
TNS3	11755643_a_at	0.00251	0.000261	0.502756
MFAP1	11721251_at	0.00678	0.00104	0.502787
FRYL	11743375_s_at	0.00159	0.00014	0.502974
RTF1	11717356_at	0.00355	0.00042	0.502982
ATP2A3	11729419_a_at	0.0102	0.00185	0.503015
AKTIP	11735364_x_at	0.00574	0.000823	0.503108
IKBKB	11755412_x_at	0.000347	1.66e-05	0.503131
FAM120B	11754197_x_at	2.85e-05	4.73e-07	0.503161
DDX46	11727818_a_at	0.00624	0.000923	0.503328
ZBTB4	11724136_s_at	0.00384	0.00047	0.503426
ANKRD44	11735492_at	0.0139	0.00286	0.503485
SMARCD3	11754980_a_at	0.0459	0.016	0.503868
DNAJC16	11755844_a_at	0.00406	0.000506	0.504005
ESYT1	11716288_s_at	0.013	0.00261	0.504007
CNN2	11751245_x_at	0.00205	0.000199	0.504031
STX10	11742744_a_at	0.00123	9.8e-05	0.504051
NDRG3	11735349_a_at	0.00073	4.71e-05	0.504137
USPL1	11745918_a_at	0.00324	0.000369	0.50419
HNRNPDL	11746949_x_at	0.0432	0.0147	0.50419
DOK1	11731531_x_at	0.0117	0.00226	0.504233
NUS1	11721510_x_at	0.0323	0.00965	0.504252
RPL28	200003_PM_s_at	0.00336	0.000389	0.504253
BTN2A1	11747874_x_at	0.00131	0.000107	0.504265
SAP30L	11720376_a_at	0.00418	0.000526	0.504478
PHF20L1	11727529_at	0.0332	0.0101	0.504511
RPN1	11742852_a_at	0.000399	2.04e-05	0.504592
ITSN2	11763275_x_at	0.031	0.00909	0.504695
INTS9	11733853_s_at	4.03e-05	7.8e-07	0.504775
SMU1	11730285_at	0.000962	6.92e-05	0.504785
ATP2A2	11718873_a_at	0.00865	0.00147	0.504785
TBC1D14	11715761_a_at	0.0226	0.00576	0.504868
COBLL1	11743352_s_at	0.00482	0.000643	0.504881
SNRNP70	11754463_a_at	0.00356	0.000423	0.504899
PRR14	11725696_a_at	0.00611	0.000897	0.504943
MIA3	11722907_at	0.017	0.0038	0.505132
STYXL1	11764038_x_at	0.00223	0.000222	0.505189
PYROXD1	11723801_s_at	0.008	0.00132	0.505218
MBNL1	11748361_x_at	0.0174	0.00394	0.505274
ZNF45	11726191_at	0.0136	0.00278	0.505333
RPL37A	11759821_at	0.0437	0.0149	0.505363
ZNF24	11723260_s_at	0.0128	0.00254	0.505383
CTBP2	11740001_x_at	0.035	0.0108	0.505402
CAB39	11745552_a_at	0.0119	0.00232	0.505409
UBP1	11736925_s_at	0.00758	0.00122	0.505417
UBA1	11715371_a_at	0.00431	0.000551	0.505552
KLF6	11716094_a_at	0.0244	0.00638	0.505557
CSNK1D	11754298_x_at	0.00284	0.000308	0.505654
PLPP5	11741440_x_at	0.0103	0.00189	0.505821
CTNNBIP1	11716234_s_at	0.0301	0.00871	0.505908
SRA1	11742689_a_at	0.00455	0.000593	0.505955
PIK3AP1	11748798_a_at	0.044	0.0151	0.505984
FHOD1	11757642_a_at	0.000104	3.1e-06	0.506241
RBAK	11736444_at	0.0256	0.00688	0.506388
SKAP1	11724149_a_at	0.0123	0.00241	0.506421
SF3A3	11718112_at	0.0016	0.000141	0.506462
SDHD	11758330_x_at	0.00243	0.000249	0.506472
GLE1	11736013_at	0.0127	0.00251	0.506521
ATPAF1	11717263_s_at	0.00199	0.000191	0.506522
SCAF8	11748406_a_at	0.00103	7.65e-05	0.506614
HIST1H2BC	11741704_x_at	0.0323	0.00967	0.506832
SCAP	11717586_a_at	0.000475	2.61e-05	0.506832
CMTM3	11753549_a_at	0.00899	0.00155	0.506959
EIF2S3	11719066_a_at	0.0265	0.00726	0.506979
MAT2A	11757376_s_at	0.0336	0.0102	0.506991
APH1B	11740603_a_at	0.0116	0.00224	0.507001
ABL2	11743675_x_at	0.00423	0.000537	0.507093
MAU2	11725461_s_at	0.000764	5.03e-05	0.507161
CSGALNACT1	11732526_s_at	0.0274	0.00761	0.507262
ADPRH	11756143_s_at	0.00863	0.00147	0.507289
HMGN2	11724740_x_at	0.0141	0.00292	0.507422
SH3GLB1	11718847_at	0.0231	0.00593	0.507423
SACM1L	11755387_a_at	0.0249	0.00657	0.507437
H2AFV	11758616_s_at	0.0104	0.0019	0.507501
ECHDC1	11717432_a_at	0.0353	0.011	0.507502
CHTF8	11717396_a_at	0.000441	2.36e-05	0.50752
FAM220A	11719424_at	0.0111	0.0021	0.50755
CD200R1	11734063_a_at	0.016	0.00348	0.507595
CTC1	11734894_at	0.000633	3.89e-05	0.507777
RNF141	11726256_a_at	0.00649	0.000978	0.507795
SLC44A2	11740973_s_at	0.00262	0.000276	0.507828
PPIF	11720771_x_at	0.000387	1.94e-05	0.507894
BCLAF1	11756490_a_at	0.0257	0.00693	0.507938
CERS5	11730217_a_at	0.000242	1.02e-05	0.508099
TMEM168	11722421_at	0.0178	0.00406	0.508465
CD47	11735329_a_at	0.0412	0.0137	0.508725
ZNF711	11724414_a_at	0.0313	0.00918	0.508732
TTLL4	11748937_a_at	0.00111	8.56e-05	0.508773
ZNF292	11743670_s_at	0.0353	0.0109	0.508778
RABL2A	11756624_x_at	0.00554	0.000782	0.508787
HSP90B1	11752967_x_at	0.0311	0.00914	0.508983
ZAP70	11728780_a_at	0.0237	0.00615	0.509075
NDUFB6	11717670_a_at	0.0137	0.00281	0.50912
MED14	11728676_at	0.0193	0.00458	0.509125
ABCF3	11716612_a_at	6.04e-05	1.41e-06	0.509127
GATAD2B	11724895_at	0.000358	1.74e-05	0.509162
SIGLEC10	11747873_x_at	0.0149	0.00315	0.509333
RICTOR	11722098_a_at	0.0356	0.0111	0.509409
ABI1	11733046_x_at	0.0155	0.00331	0.50967
ZNF317	11735748_a_at	0.000546	3.17e-05	0.5097
IFFO2	11721208_at	0.00289	0.000315	0.509904
EIF4G2	11717092_s_at	0.0145	0.00304	0.509944
AMD1	11717237_s_at	0.0163	0.00359	0.510126
CHST11	11759496_at	0.0153	0.00326	0.510129
LRWD1	11758177_x_at	0.00731	0.00116	0.510133
MED6	11731438_x_at	0.000189	7.34e-06	0.510169
AHCTF1	11730252_s_at	0.00516	0.000708	0.510197
CASK	11729379_s_at	0.00785	0.00128	0.510269
MAN2A1	11725471_a_at	0.0366	0.0115	0.510289
FAM50B	11726377_at	0.00199	0.00019	0.510422
COG5	11742053_a_at	0.00101	7.41e-05	0.51056
RAC1	11715578_s_at	0.000306	1.39e-05	0.510565
AP1G1	11722576_at	0.000559	3.28e-05	0.510611
SERP1	11720310_s_at	0.0476	0.0168	0.510686
PRPF4B	11718235_at	0.0365	0.0115	0.51069
PIK3IP1	11751393_a_at	0.0251	0.00666	0.510762
PRKCA	11754557_s_at	0.0144	0.003	0.51088
ZMPSTE24	11726600_s_at	0.00528	0.000731	0.510956
VWA5A	11739258_a_at	0.00712	0.00112	0.511099
GOLGB1	11754456_a_at	0.000397	2.02e-05	0.511159
VPS35	11743390_s_at	0.00234	0.000238	0.511384
NUDT16	11730839_at	0.0016	0.000141	0.511429
PSEN2	11723672_a_at	0.00409	0.000511	0.51158
ZNF396	11761126_at	0.0127	0.00252	0.511582
CALML4	11739610_a_at	0.0399	0.0131	0.511648
TMEM185B	11754231_at	0.0116	0.00223	0.511698
ANKRD11	11727065_s_at	0.000456	2.47e-05	0.511739
ADPGK	11739113_a_at	0.00359	0.000428	0.511756
ACSL5	11723947_a_at	0.0154	0.00329	0.511822
HIPK3	11740126_a_at	0.0321	0.00958	0.511909
PDPK1	11719709_x_at	0.000978	7.09e-05	0.511948
NSUN2	11717462_s_at	0.0213	0.00528	0.511992
ARF6	11758273_s_at	0.0174	0.00395	0.512009
KIAA0556	11739716_at	0.0101	0.00184	0.512026
PNN	11725030_s_at	0.0305	0.00888	0.512089
NFAT5	11757943_s_at	0.00444	0.000573	0.512248
AKIRIN1	11741556_x_at	0.00194	0.000183	0.51228
TRERF1	11727644_a_at	8.2e-05	2.24e-06	0.512357
FBXO11	11762421_s_at	0.00843	0.00142	0.512419
LAPTM4A	11753275_a_at	0.0197	0.00471	0.512487
ANTXR2	11736048_at	0.0105	0.00193	0.512526
DENND4C	11746333_a_at	0.00692	0.00107	0.512627
TNPO3	11759500_at	0.000354	1.71e-05	0.512634
RBMXL1	11726096_s_at	0.00159	0.000139	0.512709
NFATC2IP	11758094_s_at	0.0025	0.00026	0.512785
MAEA	11748193_a_at	0.00313	0.000353	0.512819
FES	11722039_x_at	0.0155	0.00334	0.512959
CIRBP	11748124_a_at	0.00727	0.00115	0.513049
HNRNPU	11722001_a_at	0.00686	0.00106	0.513053
MPZL1	11744998_a_at	0.0206	0.00504	0.513158
TSC22D2	11754933_s_at	0.0181	0.00417	0.513204
FOXJ3	11756202_a_at	0.00432	0.000552	0.513206
EMC2	11726072_a_at	0.0473	0.0167	0.513224
FLOT1	11757316_a_at	0.0137	0.00278	0.51329
BTLA	11735221_a_at	0.0298	0.00859	0.513371
DYNC1H1	11715590_at	0.003	0.000333	0.513404
SPAG9	11744886_a_at	0.000725	4.67e-05	0.513475
SEC11A	11757423_x_at	0.0136	0.00276	0.513476
AMMECR1L	11736937_s_at	0.0045	0.000583	0.513624
LTB	11739658_a_at	0.0046	0.000601	0.513865
CD3D	11723264_a_at	0.0498	0.0179	0.514109
ABCA7	11755091_a_at	0.00556	0.000787	0.514293
CD300LF	11727739_a_at	0.0138	0.00282	0.514549
TMEM199	11756938_a_at	0.00587	0.000849	0.514727
CEPT1	11754503_a_at	0.0467	0.0164	0.515137
METTL25	11726112_at	0.00668	0.00102	0.51515
BTN2A2	11754828_a_at	0.0121	0.00237	0.515223
ARHGEF9	11721188_a_at	0.0156	0.00335	0.515427
HNRNPA3	11757830_s_at	0.0176	0.00399	0.515525
PLPP6	11743337_at	0.0274	0.00762	0.515582
NONO	11725985_s_at	0.0336	0.0102	0.515603
TBL1X	11740214_a_at	0.00457	0.000596	0.515658
DUSP11	11756744_a_at	0.00707	0.0011	0.515679
NUP58	11720795_s_at	0.0196	0.00467	0.515701
CCDC126	11730361_at	0.0192	0.00454	0.515766
APH1A	11718148_a_at	0.00351	0.000414	0.515912
SLC39A1	11751314_a_at	0.00626	0.000926	0.515972
ARL4C	11732331_s_at	0.00979	0.00176	0.515997
CD164	11754798_s_at	0.0202	0.00488	0.516074
S100A10	11743112_at	0.0112	0.00212	0.516113
ACTG1	11762785_x_at	0.00857	0.00145	0.516182
SPG7	11715993_s_at	0.000545	3.16e-05	0.516206
TMED2	11751577_a_at	0.0477	0.0169	0.516214
TRNAU1AP	11747084_a_at	0.00844	0.00142	0.516242
EIF4A1	11762854_a_at	0.000604	3.67e-05	0.516608
ORC3	11718488_a_at	0.0156	0.00334	0.516628
HMBOX1	11741393_a_at	0.0217	0.00541	0.516634
MGST1	11747570_a_at	0.0189	0.00444	0.516833
ADPRHL2	11716942_a_at	0.00337	0.00039	0.516865
IFITM1	11715670_a_at	0.0133	0.00269	0.516888
TSPO	11716614_a_at	0.00682	0.00105	0.516896
CLIP1	11743785_x_at	0.00161	0.000142	0.516944
PEPD	11715957_s_at	0.0243	0.00637	0.517078
DOCK9	11746257_a_at	0.0217	0.0054	0.517133
XRN1	11743781_a_at	0.0136	0.00277	0.517259
MBP	11757273_s_at	0.00592	0.000859	0.517306
ZNF142	11755217_a_at	0.00442	0.00057	0.517437
P2RX4	11748548_a_at	0.0147	0.00309	0.517452
CAPG	11757519_x_at	0.00807	0.00134	0.517458
ARL6IP5	11748863_x_at	0.0081	0.00134	0.517549
FNBP4	11717945_a_at	0.0136	0.00277	0.517663
ATM	11751874_a_at	0.00221	0.00022	0.517672
IARS2	11717307_s_at	0.00246	0.000253	0.517697
PLEKHM3	11755184_x_at	0.00785	0.00128	0.517851
SART3	200069_PM_at	0.00185	0.000172	0.517969
IPO8	11724869_x_at	0.00486	0.000652	0.517991
AKAP8	11722750_s_at	0.00155	0.000135	0.51835
KDM4B	11755420_a_at	0.00349	0.00041	0.518432
NCBP2	11751520_x_at	0.0442	0.0152	0.518628
RHOA	11757012_x_at	0.0225	0.00571	0.518646
YTHDF2	11717243_x_at	0.00574	0.000823	0.518709
MPHOSPH8	11734844_a_at	0.00546	0.000764	0.518711
UBR2	11725879_a_at	0.0068	0.00105	0.518783
HELZ2	11726803_x_at	0.0239	0.00619	0.519157
NUFIP2	11718963_at	0.000823	5.58e-05	0.519199
TPD52L2	11749294_a_at	0.00299	0.000331	0.519386
TLK1	11733109_a_at	0.0405	0.0134	0.51939
ZNF721	11724388_at	0.0313	0.0092	0.519486
TCF7L2	11746313_a_at	0.0131	0.00264	0.519531
UBC	11755503_x_at	7.71e-05	1.99e-06	0.519604
ANKRD13A	11717691_a_at	0.00362	0.000433	0.519611
ZBTB8OS	11763273_at	0.00509	0.000696	0.519633
COQ10B	11758157_s_at	0.000931	6.63e-05	0.519642
KCTD6	11726443_a_at	0.00445	0.000575	0.519654
EEPD1	11726019_at	0.00204	0.000198	0.519967
FLNA	11746880_x_at	0.00748	0.0012	0.520084
WSB1	11746616_a_at	0.0499	0.018	0.520186
PTGER4	11725794_at	0.0339	0.0103	0.520203
FBXO3	11720762_a_at	0.0333	0.0101	0.52023
ANAPC5	200098_PM_s_at	0.00727	0.00115	0.520326
VPS52	11717079_a_at	0.000533	3.07e-05	0.520328
C11orf54	11724320_x_at	0.0151	0.0032	0.520379
HNRNPD	11749304_x_at	0.0145	0.00305	0.520429
ALG8	11732176_a_at	0.00332	0.000382	0.520459
ZNF277	11750300_a_at	0.026	0.00705	0.520497
TTC14	11736114_a_at	0.0378	0.0121	0.520542
SF1	11720172_s_at	0.00297	0.000327	0.520554
BBS10	11728356_at	0.0152	0.00324	0.520676
FCHSD1	11747190_a_at	0.000867	6.01e-05	0.520742
KMT2C	11739411_a_at	0.0354	0.011	0.520753
CCDC115	11754915_a_at	0.00181	0.000167	0.520778
HNRNPF	11749786_x_at	0.00735	0.00117	0.520792
RRAGC	11758809_at	0.00691	0.00107	0.520962
JAM3	11755869_a_at	0.0331	0.00998	0.521067
CD1E	11740821_a_at	0.00186	0.000172	0.52108
SPTLC2	11758838_at	0.0177	0.00403	0.52113
SRSF7	11751602_a_at	0.036	0.0113	0.521143
TRAFD1	11744213_a_at	0.00359	0.000428	0.521191
FHL3	11744755_x_at	0.000708	4.53e-05	0.521264
SFSWAP	11718713_a_at	0.00202	0.000194	0.52127
TSPAN4	11716996_a_at	0.0386	0.0124	0.521316
ISG20L2	11739702_x_at	0.00151	0.00013	0.521373
POM121	11725975_at	0.000503	2.83e-05	0.521448
TSHZ1	11744743_a_at	0.00907	0.00158	0.521454
DTD1	11746103_a_at	0.000751	4.89e-05	0.521974
HAVCR2	11728229_a_at	0.0291	0.0083	0.522403
FRAT1	11745038_s_at	0.00189	0.000176	0.52244
AGFG1	11740338_a_at	0.00464	0.000608	0.522498
GNPTG	11754021_x_at	0.00305	0.00034	0.522672
CLIC1	11746251_x_at	0.0209	0.00514	0.522718
EPS15	11719485_x_at	0.0284	0.008	0.522731
CLN3	11747203_x_at	1.33e-05	1.65e-07	0.522793
GANAB	11755270_a_at	0.00103	7.68e-05	0.522921
TRIT1	11724292_s_at	0.0225	0.00572	0.522959
CCDC50	11733157_a_at	0.0179	0.00411	0.523014
TMEM106B	11739231_a_at	0.0268	0.00737	0.523163
TTC3	11715642_s_at	0.0241	0.00628	0.523166
ITCH	11731493_at	0.00293	0.000321	0.523177
SIRPG	11754881_a_at	0.0171	0.00385	0.523253
KRBOX4	11733283_a_at	0.0249	0.00659	0.523393
PNISR	11764283_s_at	0.0446	0.0153	0.523398
RABIF	11728689_at	0.00563	0.000799	0.523652
ANGEL2	11733990_a_at	0.0142	0.00295	0.523674
PHF11	11751641_x_at	0.0441	0.0151	0.523745
SH3KBP1	11724817_a_at	0.000893	6.25e-05	0.523772
C14orf93	11741762_x_at	0.00248	0.000256	0.523867
NPTN	11719209_x_at	0.00264	0.00028	0.5239
NUDT16L1	11758034_s_at	0.000177	6.62e-06	0.523978
SOS2	11719430_at	0.0107	0.00198	0.524084
VPS53	11726089_at	0.00956	0.0017	0.52412
DIDO1	11721023_a_at	0.00142	0.00012	0.524238
ACTR3	11728643_s_at	0.00305	0.00034	0.524275
TM9SF4	11755192_a_at	7.99e-05	2.12e-06	0.524332
FEZ2	11727532_a_at	0.0125	0.00247	0.524352
RDH10	11719627_at	0.00352	0.000416	0.524394
STAG1	11743276_s_at	0.00826	0.00138	0.524432
RAB21	11727505_at	0.0141	0.00291	0.524462
ADSS	11743362_s_at	0.0206	0.00502	0.524515
TSPAN14	11718513_x_at	0.0141	0.00292	0.524539
UMAD1	11745906_at	0.0181	0.00416	0.52489
COX15	11727392_s_at	0.00365	0.000439	0.525018
IL32	11735174_a_at	0.0161	0.00352	0.525021
MRPL33	11757411_x_at	0.0194	0.0046	0.525098
RBM48	11723458_x_at	0.00368	0.000443	0.525309
TMEM131	11724679_a_at	0.000172	6.35e-06	0.525334
CTBP1	11738637_a_at	0.0174	0.00395	0.525369
PPP3CA	11722848_a_at	0.0376	0.012	0.525482
GOLPH3	11722565_a_at	0.00717	0.00113	0.525496
NFE2L2	11743380_s_at	0.0161	0.00351	0.525697
ZNF445	11729878_at	0.0109	0.00203	0.5258
PPFIBP2	11752282_a_at	0.000959	6.89e-05	0.5259
THYN1	11717784_a_at	0.0247	0.0065	0.526051
IVNS1ABP	11720759_s_at	0.0138	0.00284	0.526178
DCAF5	11725649_s_at	0.00194	0.000184	0.526179
ZNF331	11729766_x_at	0.000286	1.28e-05	0.526245
AP3M1	11729629_a_at	0.0152	0.00324	0.52631
FAM111A	11730690_a_at	0.0306	0.00892	0.526353
CELF2	11753150_x_at	0.00828	0.00138	0.526375
RPS16	11758289_x_at	0.0235	0.00607	0.526522
ERP44	11718355_x_at	0.00615	0.000905	0.526544
KCTD18	11727686_a_at	0.00315	0.000356	0.526599
PSMD12	11732779_a_at	0.011	0.00207	0.526722
UBA3	11730728_a_at	0.0393	0.0128	0.52673
DYNLT1	11716583_a_at	0.0296	0.00851	0.526888
ZNF230	11727201_at	0.02	0.00482	0.526942
UPRT	11754369_x_at	0.0274	0.0076	0.527006
USF3	11755253_a_at	0.000354	1.71e-05	0.527107
HNRNPC	11732247_s_at	0.00351	0.000413	0.527151
CCDC47	11743728_a_at	0.00102	7.57e-05	0.527152
MED4	11720497_at	0.0111	0.00208	0.527276
ZNF706	11721523_s_at	0.0105	0.00193	0.52728
ZNF169	11759751_at	0.00224	0.000224	0.527328
SSBP1	11728760_a_at	0.0173	0.0039	0.52736
SCAMP1	11733055_a_at	0.0204	0.00495	0.527368
PGK1	11756297_x_at	0.00334	0.000385	0.52739
SRSF1	11727812_s_at	0.0231	0.00594	0.527391
SRSF5	11753802_a_at	0.0346	0.0107	0.527514
TRAPPC12	11754345_a_at	0.000164	5.91e-06	0.527601
DIAPH2	11722339_a_at	0.00553	0.000779	0.527817
ZNF766	11723786_a_at	0.00156	0.000137	0.527836
KLHL3	11744507_a_at	0.00239	0.000244	0.527937
ZNF330	11728270_a_at	0.018	0.00415	0.527975
AGTRAP	11753687_x_at	0.0232	0.00598	0.527986
DTX3L	11717561_s_at	0.0468	0.0165	0.528025
LAT	11743748_a_at	0.00338	0.000392	0.528094
RASSF5	11730872_x_at	0.00181	0.000167	0.52832
SASH1	11718433_a_at	0.000825	5.59e-05	0.52846
DOCK10	11723863_a_at	0.00805	0.00133	0.528466
TYMP	11760977_a_at	0.0195	0.00463	0.528748
RAB9A	11742737_a_at	0.0145	0.00303	0.528772
PDCD6	11717839_a_at	0.00468	0.000617	0.528786
PCSK5	11758913_at	0.00143	0.000121	0.528998
HARS	11717139_a_at	0.0112	0.00213	0.529028
XRCC6	11730714_s_at	0.0112	0.00211	0.52905
FKBP15	11719951_a_at	0.0186	0.00435	0.529076
MPZL2	11719833_at	0.0358	0.0112	0.529089
EVI5	11727222_at	0.000228	9.37e-06	0.529334
VPS29	11744863_a_at	0.0358	0.0112	0.529515
MTHFR	11727178_x_at	0.000452	2.44e-05	0.529592
CAMKK2	11729542_a_at	0.0258	0.00696	0.52972
C19orf66	11744178_a_at	0.00922	0.00161	0.529854
ZFC3H1	11743318_s_at	0.00563	0.0008	0.529931
ITPR1	11739564_s_at	0.0159	0.00345	0.529952
NUDT19	11730496_x_at	0.00151	0.00013	0.530264
BTN3A2	11730807_x_at	0.0195	0.00466	0.530318
PURB	11716924_s_at	0.00715	0.00112	0.530336
RAB18	11744480_s_at	0.0192	0.00455	0.530388
TMEM41B	11758119_s_at	0.00445	0.000575	0.53051
GON4L	11744592_a_at	1.69e-05	2.25e-07	0.530704
ADAP2	11725175_x_at	0.0156	0.00336	0.530828
SLC38A6	11744715_a_at	0.03	0.00867	0.531028
CNPY3	11754976_x_at	0.000293	1.31e-05	0.531121
GTPBP8	11731247_a_at	0.0246	0.00645	0.531257
POLG	11718899_at	0.00638	0.000953	0.531258
AQR	11742845_at	0.00093	6.62e-05	0.531314
KHDRBS1	11748491_a_at	0.0282	0.00795	0.531509
MEI1	11745105_a_at	0.00525	0.000725	0.531619
RASAL3	11731783_a_at	0.000796	5.33e-05	0.531698
LYAR	11722839_at	0.0224	0.00566	0.531752
MED1	11721007_a_at	0.00347	0.000407	0.531769
KIAA2026	11727594_a_at	0.0012	9.43e-05	0.531883
PLIN3	11722993_x_at	0.0138	0.00283	0.532012
RPA2	11749574_a_at	0.00424	0.000538	0.532246
ZNF33A	11732343_at	0.00256	0.000268	0.532331
NLRC5	11755758_s_at	0.0181	0.00418	0.532466
S100A9	11716523_at	0.0145	0.00304	0.532471
CD4	11738980_a_at	0.000122	3.91e-06	0.532532
SYNE2	11718650_a_at	0.00179	0.000164	0.5326
HP1BP3	11744692_s_at	0.00217	0.000215	0.53274
TMEM65	11743095_at	0.00639	0.000955	0.532762
CR2	11756900_a_at	0.0167	0.00371	0.532781
SEMA4A	11750712_a_at	0.00295	0.000324	0.5328
SRSF2	11749302_s_at	0.0342	0.0105	0.532867
SAMD3	11731949_a_at	0.0272	0.00753	0.532956
MSL3	11722874_s_at	0.0155	0.00333	0.533014
SNRNP200	11744201_x_at	0.00365	0.000439	0.533067
EML3	11722089_a_at	0.000733	4.74e-05	0.533153
KLHL7	11759656_a_at	0.0152	0.00323	0.533168
ACAA1	11730542_x_at	0.00303	0.000337	0.533356
CANX	11727425_s_at	0.0173	0.00391	0.533431
DBNL	11747076_a_at	7.04e-05	1.74e-06	0.533542
ZC3H7A	11744634_a_at	0.00246	0.000253	0.533644
ITGB1	11758276_s_at	0.011	0.00208	0.533652
PTBP3	11733058_a_at	0.0342	0.0105	0.533715
SYPL1	11715822_s_at	0.0271	0.00748	0.533741
PPP6R2	11720408_at	0.0004	2.04e-05	0.533746
WDR47	11721260_a_at	0.0157	0.0034	0.533782
EWSR1	11756366_x_at	0.0068	0.00105	0.533886
MFN1	11755894_a_at	0.0222	0.00559	0.533987
NFKBIA	11744000_a_at	0.0225	0.00571	0.534216
PHC3	11722280_at	0.0254	0.0068	0.534258
OGT	11744798_a_at	0.0124	0.00244	0.53434
ULK2	11729753_at	0.00204	0.000198	0.534385
TMEM64	11727023_at	0.0113	0.00214	0.534391
KCTD7	11723765_at	0.00172	0.000155	0.534489
ZBTB21	11726152_a_at	0.0101	0.00183	0.534615
NAPEPLD	11740685_s_at	0.0161	0.00353	0.534662
SUSD1	11722522_a_at	0.024	0.00625	0.534727
SMARCA2	11739997_s_at	0.000676	4.26e-05	0.534767
MARS	11763167_x_at	0.000438	2.34e-05	0.534921
PPM1B	11735019_a_at	0.01	0.00181	0.535078
MAP3K4	11729531_a_at	0.0024	0.000245	0.535079
RAPGEF6	11722313_a_at	0.000821	5.55e-05	0.535111
RXRB	11717208_at	1.35e-05	1.69e-07	0.535395
WAPL	11750328_s_at	0.0143	0.00298	0.535541
PDCD4	11743354_a_at	0.0106	0.00196	0.535766
TMEM205	11729377_a_at	0.0057	0.000814	0.53581
NCOA3	11752022_s_at	0.0012	9.4e-05	0.535904
SF3B2	11715581_a_at	0.000289	1.29e-05	0.53592
STAG2	11731108_s_at	0.0195	0.00463	0.535972
APMAP	11717153_a_at	0.0234	0.00605	0.535985
LEPROTL1	11716264_at	0.0184	0.00426	0.536026
AGGF1	11754726_a_at	0.0146	0.00306	0.536111
ZNF180	11747977_a_at	0.00995	0.00179	0.53612
BRD8	11718721_x_at	0.00506	0.00069	0.536314
NNT	11737811_a_at	0.00956	0.0017	0.536508
YWHAZ	11758750_x_at	0.00476	0.000632	0.536625
LENG8	11756997_x_at	0.000149	5.18e-06	0.53666
NR3C1	11755240_s_at	0.0363	0.0114	0.536741
FAM91A1	11719897_x_at	0.0105	0.00193	0.536746
UBN2	11727511_s_at	0.0012	9.44e-05	0.536779
MBTD1	11721413_at	0.0294	0.00838	0.536862
DHRS12	11730448_a_at	0.0256	0.00686	0.536932
TPMT	11727822_a_at	0.0411	0.0137	0.537018
CAST	11744916_x_at	0.00131	0.000107	0.537243
RNF31	11717173_a_at	0.0026	0.000273	0.537261
PCBP2	11763376_s_at	0.00341	0.000397	0.537342
PAFAH1B1	11716152_s_at	0.00156	0.000137	0.537501
SIAH1	11749340_s_at	0.024	0.00622	0.537617
GNAI2	11757732_x_at	0.000387	1.94e-05	0.537624
UPF1	11717322_a_at	7.49e-05	1.89e-06	0.537652
BCOR	11724716_a_at	0.0141	0.00292	0.537767
LIMK2	11734740_a_at	0.0395	0.0129	0.537777
RAPGEF1	11716435_a_at	0.000113	3.48e-06	0.537872
PRRC1	11755852_s_at	0.0233	0.006	0.538364
TOM1L2	11718718_a_at	1.7e-05	2.29e-07	0.53841
NXPE3	11744630_a_at	0.0114	0.00218	0.538435
MALSU1	11723046_a_at	0.00113	8.74e-05	0.538705
FAM83H	11719151_at	0.00057	3.37e-05	0.538842
CD74	11739401_a_at	0.0349	0.0108	0.538851
ZNF75D	11721234_a_at	0.000321	1.49e-05	0.538925
DDX28	11720180_at	0.00056	3.29e-05	0.538986
TRAPPC8	11736267_at	0.00864	0.00147	0.539039
FBXO28	11754416_s_at	0.0104	0.0019	0.539125
SLC35A1	11755739_a_at	0.0217	0.00541	0.539196
XRN2	11743118_a_at	0.00136	0.000113	0.539303
PDLIM5	11717107_a_at	0.00481	0.000642	0.53945
SAP30BP	11744403_x_at	0.00114	8.81e-05	0.53947
ZC3H18	11754791_x_at	0.000147	5.11e-06	0.539633
GSN	11723329_a_at	0.012	0.00233	0.539666
RASA3	11735740_a_at	0.000774	5.12e-05	0.539853
MALT1	11741626_a_at	0.00195	0.000185	0.539894
SLC26A11	11719829_a_at	0.0063	0.000934	0.539994
RBM12	11719925_a_at	0.00597	0.000868	0.54005
KCNE3	11720712_a_at	0.0246	0.00645	0.540138
GNS	11716751_a_at	0.00298	0.000329	0.540175
UBQLN2	11758656_s_at	0.0012	9.46e-05	0.540208
CSNK1A1	11762434_s_at	0.00465	0.000609	0.540216
INPP4A	11742020_a_at	0.000948	6.79e-05	0.540333
SCLT1	11759959_s_at	0.0111	0.0021	0.540347
FBXO21	11743854_s_at	0.00542	0.000758	0.540415
ZNF805	11739609_a_at	0.00229	0.00023	0.540538
TPK1	11724434_a_at	0.00585	0.000846	0.54059
CUL5	11722479_a_at	0.0322	0.00962	0.540774
HIVEP1	11722547_a_at	0.0103	0.00188	0.541057
TC2N	11739725_a_at	0.0334	0.0101	0.54108
TOR4A	11729059_x_at	0.00512	0.000701	0.541164
UNC50	11757366_x_at	0.0106	0.00197	0.541198
ABR	11741077_x_at	7.84e-05	2.06e-06	0.541207
UBXN4	11744417_a_at	0.0256	0.00685	0.541216
ABCG1	11750659_a_at	0.0118	0.00229	0.541251
SLK	11725219_a_at	0.0105	0.00194	0.541342
SH2D1A	11728290_a_at	0.0209	0.00513	0.541421
DDX24	11749131_a_at	0.00859	0.00146	0.541652
FYN	11754587_a_at	0.00196	0.000186	0.541688
ACOT9	11736329_a_at	0.0233	0.00598	0.541767
DERL2	11717553_at	0.00209	0.000204	0.541782
FBXL12	11754567_a_at	0.00195	0.000185	0.541866
MSL1	11756433_a_at	0.00491	0.000661	0.541935
ZMYM6	11734054_a_at	0.0458	0.0159	0.541938
RPAIN	11744831_a_at	0.0215	0.00535	0.542155
TM2D2	11736834_a_at	0.00108	8.24e-05	0.542277
ZNF641	11724290_x_at	0.017	0.0038	0.542325
RPS28	11761031_x_at	0.00288	0.000313	0.542349
MYO1G	11755830_a_at	0.000418	2.19e-05	0.542495
NFS1	11748839_a_at	0.000613	3.73e-05	0.542539
AAK1	11736635_a_at	0.00893	0.00154	0.542734
CYLD	11723095_a_at	0.0136	0.00277	0.542802
SH2D3C	11741250_a_at	0.000598	3.6e-05	0.542817
UBE2Q1	11718501_a_at	0.00139	0.000116	0.543182
C19orf38	11737038_at	0.025	0.00664	0.54325
TSPAN32	11731367_x_at	0.000714	4.58e-05	0.54329
DUSP1	11715765_a_at	0.0346	0.0106	0.543405
NRG1	11740346_a_at	0.0343	0.0105	0.543481
HIVEP2	11754206_a_at	0.0314	0.00926	0.543915
SMAD4	11744679_a_at	0.00555	0.000783	0.5441
SRSF9	11718666_x_at	0.0113	0.00214	0.544135
PPP1R18	11747453_a_at	0.000716	4.6e-05	0.544263
PTPRN2	11754309_s_at	0.0413	0.0137	0.544274
PSMB10	11716640_a_at	0.0106	0.00197	0.544346
MBD6	11722250_s_at	0.00567	0.000808	0.544442
CDKL3	11760818_x_at	0.0269	0.00741	0.544463
TMX2	11715612_s_at	0.00274	0.000293	0.544525
EFR3A	11739116_s_at	0.0265	0.00724	0.544603
DNAJC5	11758906_at	0.000245	1.04e-05	0.544843
MTF1	11722389_at	0.00824	0.00137	0.545062
ARPC1A	11715610_a_at	0.00132	0.000108	0.545082
CRK	11725320_x_at	0.00276	0.000296	0.545569
VPS13C	11719763_a_at	0.0181	0.00417	0.545713
MAP3K8	11747602_a_at	0.00166	0.000148	0.545842
MTMR1	11733512_s_at	0.00102	7.56e-05	0.546165
RAE1	11716236_s_at	0.00494	0.000667	0.54623
SUPT20H	11760133_x_at	0.00114	8.79e-05	0.546321
ARF5	11735695_a_at	6.07e-05	1.42e-06	0.546458
MYOF	11718168_a_at	0.0186	0.00437	0.546545
ZNF182	11736858_a_at	0.0132	0.00266	0.546552
ZNF791	11749756_x_at	0.0162	0.00354	0.546566
PRKCH	11718811_s_at	0.0185	0.00432	0.546618
CCNL2	11755249_s_at	0.0028	0.000303	0.546677
OS9	11752347_x_at	0.000673	4.24e-05	0.546689
OSTM1	11719881_s_at	0.0245	0.00644	0.546719
VCPIP1	11759319_at	0.00705	0.0011	0.546734
OTULIN	11727567_s_at	7.54e-05	1.92e-06	0.546745
SLC9A3R1	11727936_a_at	0.00255	0.000266	0.546752
RAB27A	11725426_a_at	0.00469	0.000619	0.546814
ZDHHC6	11732153_a_at	0.00374	0.000453	0.546843
CD86	11751135_a_at	0.00287	0.000312	0.546917
BTAF1	11722989_a_at	0.0215	0.00534	0.546936
TBCC	11742778_s_at	0.00116	9.06e-05	0.547002
C15orf40	11737956_s_at	0.0164	0.00361	0.547021
LRRFIP1	11741490_a_at	0.00803	0.00133	0.547188
ITGAL	11751304_a_at	0.000715	4.59e-05	0.547406
AVL9	11726840_a_at	0.00199	0.00019	0.547706
ZBTB2	11727339_a_at	0.000551	3.21e-05	0.547723
FBXO38	11756638_a_at	0.0238	0.00617	0.548025
CAMK2G	11717266_s_at	0.00177	0.000161	0.548066
DUSP23	11720651_x_at	0.000913	6.45e-05	0.548086
CRTC3	11722510_at	0.000475	2.62e-05	0.548098
ACVR2A	11727164_at	0.00283	0.000306	0.548114
ATP6V1C1	11722182_a_at	0.00748	0.0012	0.548366
CAPZA1	11739007_at	0.0288	0.00817	0.548822
MAGT1	11717899_x_at	0.0106	0.00196	0.548877
RUBCN	11724164_a_at	0.00368	0.000444	0.548938
SNX1	11723937_a_at	0.000116	3.63e-06	0.549027
TMX4	11739156_at	0.0196	0.00468	0.54921
ZSCAN16	11725841_at	0.0227	0.0058	0.549237
CHD7	11723356_a_at	0.0111	0.0021	0.549338
PSMB8	11715665_a_at	0.0405	0.0134	0.549374
CRNKL1	11730749_a_at	0.00318	0.00036	0.54948
PPFIA1	11717877_a_at	0.00663	0.00101	0.549485
MSRB2	11757405_a_at	0.0124	0.00243	0.549549
TMED7	11725313_s_at	0.027	0.00746	0.549559
PDE5A	11720579_a_at	0.0398	0.0131	0.54956
DYNC1LI1	11720787_a_at	0.00191	0.000179	0.549601
DHTKD1	11721735_at	0.0055	0.000773	0.549668
KDM3A	11716574_at	0.00176	0.00016	0.549698
EVL	11760156_at	0.0185	0.00431	0.549897
EID2	11721713_a_at	0.0388	0.0125	0.550001
CEP350	11758004_s_at	0.00738	0.00118	0.550312
HPS5	11739576_x_at	0.00556	0.000786	0.55044
SHISA5	11756523_x_at	0.015	0.00317	0.550455
AGA	11751780_a_at	0.0026	0.000274	0.55053
ATP2B4	11718081_a_at	0.00694	0.00108	0.550689
LRRC58	11742722_at	0.0164	0.00362	0.550701
RPL7A	11755604_x_at	0.0433	0.0147	0.550752
SLC25A40	11759026_at	0.0448	0.0155	0.55082
EIF4E3	11730369_a_at	0.016	0.0035	0.550826
DEGS1	11757979_x_at	0.0047	0.00062	0.550962
PRCP	11715856_s_at	0.00215	0.000212	0.551034
CUL3	11716507_at	0.00697	0.00108	0.551052
ATRX	11754247_s_at	0.00353	0.000417	0.551164
FAM200B	11729673_s_at	0.0194	0.00461	0.551316
KDM5A	11743524_a_at	0.00264	0.000279	0.55145
SRI	11744438_a_at	0.00199	0.000191	0.551462
LRRC47	11725756_at	0.00141	0.000119	0.551632
ANO6	11745667_a_at	0.000589	3.51e-05	0.551671
NOSIP	11715996_a_at	0.00209	0.000204	0.551824
UBXN1	11760900_x_at	0.00115	8.96e-05	0.551956
FOXP1	11732279_at	0.00466	0.000613	0.55199
CCNY	11722834_x_at	0.000164	5.92e-06	0.552304
CCDC93	11719722_a_at	0.000669	4.2e-05	0.552343
CARS	11737758_x_at	0.00328	0.000376	0.552429
ERP29	11757602_x_at	0.0152	0.00322	0.552661
NFKBIE	11743007_at	0.00643	0.000964	0.552894
MLX	11750059_a_at	0.00443	0.00057	0.553117
RBM23	11756341_a_at	0.000118	3.7e-06	0.553165
ZNFX1	11753034_a_at	0.00131	0.000107	0.553182
CACNA2D4	11755141_a_at	0.00131	0.000107	0.553192
FAM162A	11716061_a_at	0.0105	0.00192	0.553332
PPP2R1A	11749158_a_at	0.0103	0.00187	0.553609
SEMA4D	11752178_a_at	0.00353	0.000417	0.553624
CDC42SE1	11722610_a_at	0.000396	2.01e-05	0.553839
RCHY1	11719570_at	0.0192	0.00455	0.553881
PIP4K2C	11742444_a_at	0.000424	2.23e-05	0.55392
ZNF101	11739968_a_at	0.00255	0.000266	0.553937
P2RY8	11743677_at	0.0057	0.000813	0.553981
RAB7A	11722811_s_at	0.000621	3.8e-05	0.554097
PPIL2	11762400_s_at	0.000338	1.61e-05	0.554235
MFSD14A	11743683_a_at	0.00505	0.000687	0.554291
SEL1L3	11743915_s_at	0.00923	0.00162	0.554342
HIF1AN	11721870_s_at	0.000109	3.33e-06	0.554419
HDAC1	11755718_s_at	0.00139	0.000116	0.554519
PCYOX1	11717739_at	0.000551	3.22e-05	0.554575
TMEM218	11745238_a_at	0.00574	0.000823	0.554793
MED13	11739633_s_at	0.000893	6.26e-05	0.554841
MGAT4A	11739493_at	0.0169	0.00376	0.554847
HNRNPH3	11716658_a_at	0.00957	0.0017	0.55498
RBM15	11726949_s_at	0.0151	0.00321	0.555028
TRABD2A	11744512_a_at	0.0436	0.0149	0.555032
BLOC1S4	11722237_at	0.00299	0.00033	0.555127
MTMR14	11727678_a_at	0.000424	2.23e-05	0.55542
STK17B	11726042_a_at	0.00761	0.00123	0.555431
FAM129A	11739154_at	0.0237	0.00613	0.55553
ARMCX2	11737781_a_at	0.00787	0.00129	0.555547
NFE2L3	11722660_a_at	0.0234	0.00603	0.555725
SPTLC1	11752171_s_at	0.023	0.00589	0.555739
PACSIN2	11745763_a_at	0.00297	0.000327	0.556132
ERGIC1	11743457_a_at	0.0261	0.00711	0.556171
SGPP1	11721907_at	0.0271	0.00748	0.556488
ZNF559	11748959_a_at	0.00619	0.000913	0.556501
HCST	11722680_at	0.00835	0.0014	0.556511
TSC22D3	11717829_s_at	0.0306	0.00892	0.556533
DNAJC10	11758820_at	0.00642	0.000963	0.556559
KMT5B	11739402_a_at	0.00297	0.000327	0.556675
TK2	11727558_a_at	0.00543	0.00076	0.556696
FAM110A	11721872_at	0.000152	5.33e-06	0.556736
LYSMD3	11758398_s_at	0.0425	0.0143	0.5568
TIGIT	11734112_at	0.0106	0.00196	0.556881
MITD1	11756391_a_at	0.0283	0.00798	0.556899
PRRC2C	11716567_a_at	0.00447	0.000578	0.556948
GHRL	11753865_x_at	0.00164	0.000146	0.557001
TBC1D10A	11754712_a_at	8.55e-05	2.38e-06	0.557066
EFCAB14	11758212_s_at	0.000105	3.13e-06	0.557238
AMPD2	11745744_a_at	0.000148	5.13e-06	0.557279
SLC2A6	11740957_x_at	0.00467	0.000615	0.557317
MAN1B1	11721458_s_at	0.00162	0.000144	0.557386
TMEM91	11756345_x_at	0.00193	0.000182	0.557391
PDSS1	11759973_at	0.0148	0.00311	0.557485
TRAPPC2	11724432_x_at	0.00487	0.000653	0.557828
POU2F2	11729341_at	0.000404	2.09e-05	0.557978
CASS4	11741172_a_at	0.00047	2.57e-05	0.558024
SLC9A6	11719516_a_at	0.00469	0.000618	0.558074
SLC30A7	11722286_a_at	0.00202	0.000195	0.558087
ANAPC13	11754697_a_at	0.000311	1.42e-05	0.558181
CYFIP1	11736683_a_at	0.0283	0.00799	0.558362
ZC3H12D	11763472_x_at	0.0139	0.00287	0.558491
STMN3	11716055_s_at	0.0278	0.00777	0.558496
ATP6V0B	11720314_s_at	0.000495	2.77e-05	0.558524
HEXA	11756829_x_at	0.00106	8.02e-05	0.558534
UHRF1BP1L	11743929_at	0.00924	0.00162	0.558549
RPAP3	11729183_a_at	0.0149	0.00314	0.5586
PKNOX1	11719946_a_at	0.0122	0.00238	0.558631
EP300	11725127_at	0.0135	0.00273	0.558638
2023-09-07	11741022_x_at	0.00461	0.000603	0.558836
CEACAM4	11750522_a_at	0.0196	0.00468	0.558938
ANP32A	11753749_x_at	0.00664	0.00101	0.558991
PLCB2	11754492_x_at	0.000275	1.2e-05	0.559026
HERC4	11758560_s_at	0.00997	0.0018	0.559102
EDEM3	11757995_s_at	0.0109	0.00205	0.559108
NEK4	11728264_at	0.0408	0.0135	0.559542
PRMT2	11759545_a_at	0.0123	0.00241	0.559696
KIAA1147	11718565_at	0.00441	0.000567	0.559706
HIF1A	11718759_x_at	0.0413	0.0137	0.559721
KLF10	11733068_s_at	0.038	0.0122	0.559827
AP1M1	11715762_s_at	2.92e-05	4.85e-07	0.559847
C1GALT1C1	11726618_a_at	0.0483	0.0172	0.559895
ACTR10	11715962_at	0.008	0.00132	0.560049
SLC39A6	11749546_a_at	0.0135	0.00272	0.560105
KLHL6	11727572_s_at	0.0236	0.00611	0.560131
IFNAR2	11749121_a_at	0.00253	0.000263	0.560271
SUN1	11717989_a_at	0.0341	0.0104	0.560474
FAM199X	11755408_a_at	0.0122	0.00239	0.560497
TLR4	11743196_a_at	0.0296	0.00848	0.56073
ELF1	11740445_a_at	0.0237	0.00614	0.56097
CDK13	11755318_s_at	0.000295	1.32e-05	0.56105
ENC1	11729574_at	0.000331	1.56e-05	0.561081
AQP3	11756585_a_at	0.0167	0.00373	0.561105
SLFN11	11733451_s_at	0.0405	0.0134	0.561223
SNX9	11746543_a_at	0.00059	3.53e-05	0.561752
H2AFZ	11756360_x_at	0.0099	0.00178	0.561904
ATP6AP1	11754958_s_at	0.00151	0.00013	0.561976
JADE1	11725073_s_at	9.48e-05	2.75e-06	0.562121
GALC	11743723_a_at	0.00585	0.000847	0.562125
FAM102A	11737845_x_at	0.0182	0.00422	0.562315
MTMR10	11718755_s_at	0.00244	0.000251	0.562482
B4GALT5	11716878_s_at	0.0414	0.0138	0.562632
2023-03-01	11731778_a_at	0.0373	0.0119	0.562735
HNRNPM	11739175_a_at	0.0137	0.00278	0.562791
ARHGEF3	11723491_a_at	0.00815	0.00135	0.562812
GPCPD1	11718502_at	0.00192	0.000181	0.562899
CD44	11715915_a_at	0.00101	7.49e-05	0.562921
ZEB2	11747942_a_at	0.000397	2.03e-05	0.562993
CACUL1	11739218_a_at	0.00923	0.00162	0.56308
MAPK14	11717276_s_at	0.041	0.0136	0.563363
JKAMP	11741235_a_at	0.0111	0.00209	0.563461
TNRC6A	11755871_s_at	0.000911	6.43e-05	0.563472
RAB11A	11751326_a_at	0.0204	0.00496	0.563532
NIN	11738799_x_at	0.00145	0.000123	0.563735
KIAA0040	11745810_a_at	0.0111	0.0021	0.563818
TMEM50A	11716635_x_at	0.00162	0.000144	0.563908
SNRK	11747861_a_at	0.00076	4.99e-05	0.564279
CEP192	11742422_a_at	0.0261	0.00708	0.564286
SSH1	11754319_at	0.000482	2.67e-05	0.564296
PGAM1	11720915_x_at	0.00144	0.000123	0.564298
USP8	11726705_a_at	0.00487	0.000654	0.564434
TMEM259	11717535_a_at	0.00692	0.00107	0.564531
SON	11724655_at	0.000106	3.19e-06	0.564601
RAB5A	11722790_s_at	0.00106	8.03e-05	0.564612
SLAIN2	11723722_s_at	0.00381	0.000464	0.564649
WDFY1	11754884_s_at	0.0248	0.00652	0.564767
TMEM19	11727096_s_at	0.0213	0.00525	0.564786
NSMAF	11740559_a_at	0.000525	3.02e-05	0.564902
RBSN	11718387_s_at	0.000223	9.1e-06	0.564927
STK38	11716485_at	0.00307	0.000343	0.565019
NSF	11716972_s_at	0.000922	6.53e-05	0.565075
IFNAR1	11723425_at	0.00317	0.000358	0.565169
IDH3A	11737792_a_at	0.0361	0.0113	0.565256
CREBBP	11758635_s_at	0.000202	8.01e-06	0.565406
PPM1D	11752090_a_at	0.0133	0.00268	0.565451
FCRL1	11736880_x_at	0.0334	0.0101	0.565581
HLA-F	11732354_a_at	0.00104	7.81e-05	0.565636
SLCO3A1	11726762_at	0.0137	0.0028	0.565842
SHKBP1	11718086_s_at	0.00716	0.00113	0.565913
PJA2	11719113_a_at	0.0113	0.00215	0.565962
BID	11732217_a_at	0.000198	7.79e-06	0.566332
RNF103	11717807_at	0.00188	0.000175	0.566334
FBXL13	11740804_a_at	0.0269	0.0074	0.566357
NCK2	11718465_s_at	0.000458	2.48e-05	0.566487
HIBCH	11742779_a_at	0.0191	0.00451	0.566538
AKAP10	11752580_a_at	0.000665	4.16e-05	0.566887
SYNE1	11746113_a_at	0.00302	0.000335	0.567016
NFIC	11759316_at	0.00677	0.00104	0.567195
BPTF	11752230_a_at	0.00467	0.000614	0.567252
CHUK	11754797_a_at	0.00635	0.000947	0.567367
WDR44	11726293_x_at	0.00579	0.000833	0.567529
AGER	11726044_a_at	0.00106	8e-05	0.567614
ZNF148	11753288_a_at	0.00398	0.000492	0.567619
PAK2	11739273_at	0.000378	1.88e-05	0.567695
PHF12	11761326_at	0.0082	0.00136	0.567831
ATP8B2	11725232_at	0.00896	0.00155	0.56794
NLGN3	11726389_a_at	0.000426	2.25e-05	0.56794
RPS27	11757514_x_at	0.0279	0.00781	0.568235
ARFIP1	11734992_a_at	0.00709	0.00111	0.56829
MTMR12	11758037_s_at	0.00287	0.000313	0.568565
IL16	11758090_s_at	3.44e-05	6.17e-07	0.568971
ADGRE2	11750377_a_at	0.00418	0.000526	0.569018
ZNF224	11731741_at	0.00116	9.03e-05	0.56906
MYCBP2	11727120_a_at	0.00306	0.000342	0.569126
ATP1A1	11747228_x_at	5.59e-05	1.25e-06	0.569307
NIPBL	11730268_a_at	0.00478	0.000636	0.569413
DPP4	11758194_s_at	0.0398	0.013	0.569554
MFSD8	11726666_a_at	0.00912	0.00159	0.569577
INPP5D	11744364_s_at	0.000142	4.83e-06	0.569604
MED23	11725166_s_at	0.0143	0.00297	0.56978
FEM1C	11723272_at	0.0227	0.00579	0.569949
CDC25B	11718005_a_at	0.00416	0.000523	0.569951
KIAA0232	11728702_s_at	0.00522	0.000718	0.570012
CD99L2	11716750_a_at	0.00407	0.000507	0.570146
CCNT2	11737161_a_at	0.0274	0.00762	0.57039
SP3	11723294_x_at	0.0036	0.000429	0.570409
SLC33A1	11729225_s_at	0.034	0.0104	0.570451
SEC63	11718862_at	0.0101	0.00182	0.570492
TRADD	11725373_a_at	2.33e-05	3.58e-07	0.570556
RANBP2	11754283_s_at	0.00479	0.000638	0.57074
SCAF11	11754753_a_at	0.000804	5.4e-05	0.570845
NOP2	11737775_a_at	9.57e-05	2.78e-06	0.570846
CTSA	11748622_s_at	0.000173	6.39e-06	0.570964
MCTP2	11740137_s_at	0.038	0.0122	0.571327
RYK	11740589_s_at	0.00827	0.00138	0.571398
QKI	11754137_a_at	0.00355	0.000421	0.571494
PYHIN1	11731290_a_at	0.00748	0.0012	0.571685
N4BP2L1	11755903_x_at	0.0296	0.00851	0.571693
ZNF638	11721559_s_at	0.00795	0.00131	0.571805
DOCK11	11723372_a_at	0.00834	0.0014	0.571921
JMJD1C	11718636_a_at	0.00378	0.000459	0.571978
RNF19B	11725917_s_at	0.00861	0.00146	0.572109
PHLDB2	11737040_s_at	0.0378	0.0121	0.572129
FCRL3	11759352_a_at	0.0434	0.0148	0.572369
KBTBD2	11716603_a_at	0.000983	7.14e-05	0.572452
RASSF1	11722248_a_at	0.0168	0.00373	0.572473
GPR65	11731669_at	0.0126	0.0025	0.572673
KIF21B	11722095_a_at	7.47e-05	1.89e-06	0.572748
GGA2	11722375_a_at	0.00214	0.00021	0.572935
UTP6	11733343_a_at	0.00823	0.00137	0.57297
RBM22	11719270_s_at	0.000864	5.97e-05	0.572988
ZNF136	11736277_x_at	0.0179	0.0041	0.572998
NCR1	11759971_at	0.0489	0.0175	0.573125
PDS5B	11730905_a_at	0.0059	0.000855	0.573302
CDC123	11723478_s_at	0.00828	0.00138	0.573309
CASP2	11720035_s_at	4.27e-05	8.51e-07	0.573351
CD33	11740961_a_at	0.00416	0.000523	0.573474
HLX	11722111_at	0.0202	0.00488	0.573503
IKZF1	11742022_s_at	0.000309	1.41e-05	0.573703
GSTK1	11716527_a_at	0.000332	1.56e-05	0.573789
PATL1	11717957_at	0.000882	6.14e-05	0.574043
RASGRP1	11740370_a_at	0.00775	0.00126	0.574187
CLEC2D	11731702_a_at	0.0315	0.0093	0.574264
TRRAP	11719901_s_at	0.00315	0.000355	0.574367
RPGR	11726119_at	0.00781	0.00127	0.57459
C6orf120	11729201_at	0.0287	0.00812	0.574648
PRDM2	11743840_a_at	0.0041	0.000513	0.574664
MEF2D	11717186_a_at	0.0052	0.000716	0.574824
PHF20	11736333_at	0.000129	4.22e-06	0.574835
GATAD1	11725120_a_at	0.0013	0.000106	0.574877
NUP50	11727853_a_at	0.00106	8.03e-05	0.57494
REV3L	11740540_a_at	0.0165	0.00364	0.575155
TINF2	11715868_a_at	0.0138	0.00284	0.575185
CFL1	200021_PM_at	4.86e-05	1.01e-06	0.575215
PGS1	11724793_s_at	0.0325	0.00973	0.575347
SSH2	11744850_a_at	0.00936	0.00165	0.575474
FOXO1	11727929_a_at	0.042	0.0141	0.575522
IGF1R	11718704_at	0.0225	0.00569	0.575547
MAF	11733088_at	0.0383	0.0123	0.575604
CNDP2	11745841_a_at	0.0118	0.00229	0.575626
EIF1AD	11729801_at	0.000203	8.05e-06	0.575646
C11orf21	11759915_at	0.0176	0.00399	0.575771
NFATC3	11719501_a_at	0.002	0.000192	0.575879
SWAP70	11757598_s_at	0.0343	0.0105	0.575957
BCL2L11	11718078_a_at	4.85e-05	1.01e-06	0.57598
FAM193B	11755025_a_at	0.00567	0.000809	0.576003
ZNF395	11722858_s_at	0.0356	0.0111	0.576024
GNPTAB	11721380_x_at	0.036	0.0112	0.576163
TAGLN2	11754071_x_at	0.0202	0.00488	0.576197
GTPBP3	11724992_x_at	0.0176	0.004	0.576577
VCL	11757769_s_at	0.000977	7.09e-05	0.576642
OSBP	11728751_a_at	0.00142	0.00012	0.577006
PIAS1	11737768_a_at	0.000857	5.9e-05	0.57701
MTM1	11720898_a_at	0.0121	0.00235	0.577023
ING1	11727959_s_at	0.00245	0.000252	0.577111
VPS13B	11724921_x_at	0.00291	0.000318	0.577142
TRPS1	11727171_at	0.00171	0.000154	0.57718
PTGS1	11722208_a_at	0.0266	0.00728	0.577276
SLC39A9	11716682_s_at	0.00322	0.000367	0.577379
SS18L1	11739669_at	0.0185	0.00432	0.577496
LEMD2	11741576_a_at	0.000243	1.03e-05	0.57758
ARPC5	11715686_s_at	0.00133	0.000109	0.57778
SCAPER	11732366_a_at	0.00263	0.000277	0.577866
GNG2	11721248_s_at	0.00751	0.0012	0.577899
STXBP5	11736884_a_at	0.00882	0.00151	0.578107
RBM25	11743411_a_at	0.0103	0.00187	0.578196
YME1L1	11762996_x_at	0.00837	0.0014	0.578299
NELL2	11747436_a_at	0.0199	0.00479	0.578313
TNIK	11739878_at	0.00105	7.87e-05	0.578326
SPIDR	11718246_a_at	0.00968	0.00173	0.578485
ORAI2	11755076_x_at	0.000468	2.56e-05	0.57861
KLHL8	11745397_a_at	0.0142	0.00295	0.578687
MBD2	11731288_a_at	0.0366	0.0115	0.578691
SLC9A8	11721783_a_at	0.00132	0.000109	0.578819
YWHAB	11725042_a_at	0.00296	0.000325	0.578904
ERGIC2	11758978_at	0.0107	0.002	0.578966
JDP2	11730903_a_at	0.0216	0.00539	0.578986
YAF2	11755707_a_at	0.0297	0.00853	0.579035
TMEM167B	11716231_s_at	0.00243	0.000249	0.579076
PPP1R15B	11718164_at	0.00291	0.000319	0.579085
MAP2K1	11749555_a_at	0.0001	2.97e-06	0.579181
PHF3	11742826_s_at	0.00238	0.000242	0.579311
ST6GAL1	11717720_a_at	8.2e-05	2.24e-06	0.579342
KMT2E	11726357_a_at	0.000614	3.74e-05	0.579373
CALHM2	11744538_a_at	0.00191	0.00018	0.579387
ICAM1	11733000_at	0.00855	0.00144	0.579463
STAT5A	11745364_a_at	1.28e-05	1.56e-07	0.5798
ZNF549	11760182_at	0.0224	0.00567	0.579822
GPR137B	11743011_a_at	0.000554	3.24e-05	0.579873
HLA-DMB	11762274_x_at	0.00959	0.00171	0.580109
SLC12A6	11724324_a_at	0.0111	0.0021	0.580133
GIMAP6	11750153_a_at	0.0229	0.00585	0.580617
SLC9A9	11757926_s_at	3.33e-05	5.8e-07	0.580617
FBXO33	11725457_at	0.000785	5.23e-05	0.58076
ZNF263	11717870_x_at	0.00323	0.000368	0.580772
TGFBI	11734548_a_at	0.0319	0.00947	0.581101
EXOC8	11728131_at	0.00849	0.00143	0.581279
EIF2AK3	11722152_s_at	0.0122	0.00238	0.581351
OSCAR	11730942_s_at	0.00882	0.00151	0.581415
FAM32A	11733033_a_at	0.00138	0.000115	0.581458
CD40	11742282_a_at	0.0314	0.00925	0.581485
ZNF561	11754746_a_at	0.00405	0.000504	0.581521
SRSF4	11717838_a_at	0.000201	7.91e-06	0.581656
ARHGAP15	11719332_at	0.000733	4.74e-05	0.581667
EPS15L1	11759882_a_at	0.000161	5.77e-06	0.58185
HEG1	11718309_at	0.00232	0.000235	0.581969
NIT1	11759643_at	0.000785	5.23e-05	0.582079
DCAF16	11723555_at	0.039	0.0127	0.582124
TPP1	11757469_s_at	0.000862	5.95e-05	0.582173
TRAPPC6B	11720257_a_at	0.0232	0.00596	0.582317
HLA-A	11762282_x_at	0.0204	0.00496	0.582431
TMEM184B	11716861_s_at	0.00039	1.96e-05	0.582716
SAT1	11763704_a_at	0.0301	0.0087	0.582754
NFKB1	11717542_a_at	4.26e-05	8.49e-07	0.582816
MYD88	11747538_a_at	0.00748	0.0012	0.582863
MED26	11754467_s_at	9.2e-05	2.63e-06	0.582975
PAQR8	11725472_a_at	0.0084	0.00141	0.58298
SPARC	11715603_s_at	0.0356	0.0111	0.583033
IL2RG	11753882_a_at	0.00101	7.39e-05	0.58304
TRIM4	11743592_a_at	0.000238	9.99e-06	0.583073
TAF15	11750911_x_at	0.000433	2.3e-05	0.583085
TMEM206	11722458_a_at	0.0321	0.00958	0.583106
MORC3	11723125_s_at	0.0136	0.00277	0.583116
DENND4B	11720152_a_at	2.94e-05	4.91e-07	0.583362
FMR1	11743594_s_at	0.0267	0.00734	0.583364
PTPRO	11740474_a_at	0.0215	0.00533	0.583435
SEC23A	11722354_at	0.0171	0.00386	0.583538
COG6	11724049_a_at	0.0374	0.0119	0.583589
BCAP31	11715423_s_at	1.27e-05	1.52e-07	0.583704
ASXL2	11758949_at	0.00451	0.000586	0.583709
CCL5	11753810_a_at	0.0439	0.015	0.583811
LCOR	11728429_a_at	0.00342	0.000398	0.583823
ZNF585A	11735156_a_at	0.00948	0.00168	0.584325
PATL2	11756818_a_at	0.0229	0.00586	0.58433
CCDC112	11740523_a_at	0.0109	0.00203	0.584501
TRAPPC11	11721041_a_at	0.00389	0.000477	0.584629
TBRG1	11742715_x_at	0.00787	0.00129	0.585141
F11R	11720464_x_at	0.00277	0.000298	0.585214
TRIM7	11732542_at	0.0115	0.0022	0.585243
ZNF708	11754636_a_at	0.0297	0.00853	0.58528
UNC119	11719220_a_at	7.83e-05	2.04e-06	0.585324
ACTN4	11753902_a_at	0.000173	6.39e-06	0.585366
FLVCR1	11730421_x_at	0.00137	0.000114	0.585589
SYTL3	11731846_a_at	0.00261	0.000275	0.585664
SP100	11737511_a_at	0.00229	0.000231	0.585923
KLHL21	11718984_a_at	0.00101	7.4e-05	0.586017
ARID4B	11747219_a_at	0.029	0.00824	0.586026
TES	11720230_at	0.000181	6.87e-06	0.586063
PPP2CB	11716042_x_at	0.017	0.00382	0.586067
TMEM60	11718693_at	0.0117	0.00225	0.586197
GLIPR2	11720063_a_at	0.0161	0.00351	0.58634
FERMT3	11744017_at	0.000178	6.7e-06	0.586382
PPP4R1	11746099_a_at	0.00155	0.000136	0.586568
LAT2	11726346_a_at	0.00291	0.000319	0.586695
ELMOD2	11732274_at	0.00622	0.00092	0.586781
CSF1R	11752273_a_at	0.00209	0.000204	0.586885
TAOK3	11733259_s_at	0.00358	0.000426	0.586919
RAB1A	11739327_x_at	0.00576	0.000827	0.586932
SART1	11754994_a_at	0.000178	6.67e-06	0.587232
KIZ	11760225_at	0.00182	0.000167	0.587255
DHX8	11757750_a_at	3.08e-05	5.21e-07	0.587404
CALM2	11744198_s_at	0.00956	0.0017	0.587435
IL11RA	11721024_a_at	0.00326	0.000372	0.587557
DPF2	11754311_a_at	2.31e-05	3.51e-07	0.587573
SPAG1	11740420_s_at	0.0316	0.00935	0.58777
LPXN	11743169_a_at	0.000181	6.87e-06	0.587791
PXN	11760315_at	0.00335	0.000387	0.587878
SELPLG	11749214_a_at	0.00284	0.000308	0.588211
IQSEC1	11718920_a_at	0.00175	0.000158	0.588613
GLT8D1	11737407_a_at	0.00711	0.00112	0.588723
MTIF2	11718821_a_at	0.0254	0.00679	0.588859
RREB1	11737321_a_at	0.000939	6.7e-05	0.58913
FUNDC1	11731671_at	0.0196	0.00471	0.589187
PRKX	11721056_x_at	0.0062	0.000916	0.589267
NFRKB	11722268_a_at	0.00191	0.00018	0.58935
SH2D1B	11740156_a_at	0.0429	0.0145	0.589404
DYRK2	11758911_at	0.0231	0.00593	0.589406
PDGFD	11722855_at	0.0316	0.00935	0.589456
C7orf26	11734903_a_at	1.59e-05	2.1e-07	0.589472
SPCS1	11743905_a_at	0.00334	0.000386	0.589543
RALGAPB	11727438_at	0.000953	6.84e-05	0.589587
USP36	11760159_a_at	0.0074	0.00118	0.589652
GPR108	11722216_a_at	9.89e-05	2.91e-06	0.589698
TXLNG	11759193_a_at	0.0207	0.00508	0.589744
TRIM38	11736694_x_at	0.0128	0.00255	0.58982
AOC2	11729504_a_at	0.00139	0.000116	0.589867
EXOC1	11718497_a_at	0.0167	0.0037	0.589918
SSR3	11734070_x_at	0.00709	0.00111	0.590034
RBM43	11759214_s_at	0.013	0.00259	0.590036
SGTB	11726962_at	0.0013	0.000106	0.590131
GLS	11748367_a_at	0.0237	0.00612	0.590326
FKBP1A	11715390_s_at	0.000163	5.86e-06	0.590578
UBLCP1	11722616_at	0.000841	5.75e-05	0.590593
TADA2B	11733894_x_at	2.1e-05	3.08e-07	0.5906
MED31	11734794_a_at	0.00212	0.000208	0.590684
FNDC3B	11717716_at	0.00484	0.000648	0.591085
FOXN2	11723169_s_at	0.01	0.00181	0.591088
CD3E	11729855_at	0.00564	0.000803	0.591178
TMBIM6	11747146_s_at	8.27e-05	2.28e-06	0.591219
LILRA1	11737932_x_at	0.00143	0.000121	0.59131
PPP1R12A	11733075_a_at	0.00322	0.000366	0.591546
ATG7	11740814_a_at	0.00373	0.000452	0.591642
SNX29	11743589_at	9.84e-05	2.88e-06	0.592084
CSNK1G2	11735711_a_at	0.00108	8.15e-05	0.592155
SLA	11720301_a_at	0.0118	0.00229	0.592181
RPS6KA3	11742812_a_at	0.000303	1.37e-05	0.592395
NBN	11720395_a_at	0.0325	0.00974	0.59259
PPP1R2	11760251_at	0.00849	0.00143	0.592646
PAXIP1	11755176_a_at	0.00611	0.000897	0.592656
PFN1	11753722_x_at	0.026	0.00705	0.592671
CSK	11724484_a_at	2.09e-06	1.13e-08	0.592679
RNF114	11715623_s_at	0.00968	0.00173	0.592735
LILRA2	11749617_a_at	0.0219	0.0055	0.592741
[truncated: 1,538 more rows]
