# Supplementary material for: Utilizing bioinformatics to identify biomarkers and analyze their expression in relation to immune cell ratios in femoral head necrosis
Source: Front Physiol. 2025 Apr 16;16:1373721. doi: 10.3389/fphys.2025.1373721 (PMC12040900; doi:10.3389/fphys.2025.1373721)
Supplement: Supplementary file 11 [file Table7.xlsx]

## Sheet: commonDEGs-KEGG
#Term	Database	ID	Input number	Background number	P-Value	FDR	Input	Hyperlink
Apoptosis	KEGG PATHWAY	hsa04210	35	136	7.47e-53	4.57e-50	BCL2L1|CSF2RB|TNFSF10|BIRC5|ATM|BIRC3|BIRC2|IKBKB|AKT1|AKT2|IKBKG|BCL2L11|CFLAR|FAS|BID|PIK3CD|TRADD|MAPK3|MAPK1|PIK3R2|NFKB1|CAPN2|TRAF1|NFKBIA|CHUK|DFFB|RIPK1|CASP2|TNFRSF10B|TNFRSF1A|XIAP|CASP8|MAP3K14|TUBA1A|MCL1	http://www.genome.jp/kegg-bin/show_pathway?hsa04210/hsa:598%09red/hsa:8795%09red/hsa:5594%09red/hsa:355%09red/hsa:332%09red/hsa:331%09red/hsa:330%09red/hsa:1677%09red/hsa:824%09red/hsa:8837%09red/hsa:8743%09red/hsa:7185%09red/hsa:3551%09red/hsa:637%09red/hsa:5595%09red/hsa:8517%09red/hsa:841%09red/hsa:5293%09red/hsa:4792%09red/hsa:10018%09red/hsa:5296%09red/hsa:329%09red/hsa:208%09red/hsa:4790%09…
TNF signaling pathway	KEGG PATHWAY	hsa04668	26	112	3.27e-38	1e-35	NFKBIA|BIRC3|BIRC2|IKBKB|AKT1|AKT2|IKBKG|MAP2K4|IL1B|CFLAR|FAS|PIK3CD|TRADD|MAPK3|MAPK1|PIK3R2|NFKB1|TRAF1|TRAF3|CHUK|RIPK1|IRF1|TNFRSF1B|TNFRSF1A|CASP8|MAP3K14	http://www.genome.jp/kegg-bin/show_pathway?hsa04668/hsa:5595%09red/hsa:5594%09red/hsa:355%09red/hsa:330%09red/hsa:8837%09red/hsa:3659%09red/hsa:7187%09red/hsa:7185%09red/hsa:3551%09red/hsa:3553%09red/hsa:8517%09red/hsa:5293%09red/hsa:4792%09red/hsa:5296%09red/hsa:329%09red/hsa:208%09red/hsa:4790%09red/hsa:207%09red/hsa:7133%09red/hsa:7132%09red/hsa:1147%09red/hsa:6416%09red/hsa:8717%09red/hsa:841…
Autophagy - animal	KEGG PATHWAY	hsa04140	25	128	4.36e-35	1.14e-32	BCL2L1|AKT1|AKT2|CFLAR|TSC1|GABARAPL2|PIK3CD|MAPK3|MAPK1|PIK3R2|ATG9A|MTMR3|DAPK2|DAPK1|ATG7|IGF1R|MTMR14|RRAGC|RRAGB|WIPI2|PRKCD|ATG14|LAMP2|ATG4D|AKT1S1	http://www.genome.jp/kegg-bin/show_pathway?hsa04140/hsa:22863%09red/hsa:5580%09red/hsa:598%09red/hsa:3480%09red/hsa:64121%09red/hsa:10533%09red/hsa:23604%09red/hsa:26100%09red/hsa:8837%09red/hsa:1612%09red/hsa:7248%09red/hsa:79065%09red/hsa:10325%09red/hsa:8897%09red/hsa:5595%09red/hsa:5594%09red/hsa:84971%09red/hsa:5293%09red/hsa:5296%09red/hsa:11345%09red/hsa:3920%09red/hsa:208%09red/hsa:207%09…
NOD-like receptor signaling pathway	KEGG PATHWAY	hsa04621	26	178	1.67e-33	3.4e-31	BCL2L1|NFKBIA|BIRC3|BIRC2|RIPK1|XIAP|IKBKG|IL1B|NLRP1|GABARAPL2|MAPK3|MAPK1|NFKB1|MYD88|IRAK4|TRAF3|PRKCD|CHUK|IKBKB|CASP4|CASP5|CARD8|CASP1|CASP8|MFN1|TLR4	http://www.genome.jp/kegg-bin/show_pathway?hsa04621/hsa:22861%09red/hsa:5580%09red/hsa:598%09red/hsa:5595%09red/hsa:5594%09red/hsa:841%09red/hsa:331%09red/hsa:330%09red/hsa:7099%09red/hsa:4615%09red/hsa:7187%09red/hsa:3551%09red/hsa:3553%09red/hsa:8517%09red/hsa:22900%09red/hsa:4792%09red/hsa:4790%09red/hsa:11345%09red/hsa:329%09red/hsa:55669%09red/hsa:834%09red/hsa:837%09red/hsa:838%09red/hsa:11…
NF-kappa B signaling pathway	KEGG PATHWAY	hsa04064	22	100	5.84e-32	8.24e-30	BCL2L1|ATM|BIRC3|BIRC2|RIPK1|XIAP|TRAF3|IKBKG|IL1B|TRADD|CFLAR|NFKB1|MYD88|IRAK4|TRAF1|NFKBIA|CHUK|IKBKB|TNFRSF1A|CD14|MAP3K14|TLR4	http://www.genome.jp/kegg-bin/show_pathway?hsa04064/hsa:598%09red/hsa:331%09red/hsa:330%09red/hsa:929%09red/hsa:8837%09red/hsa:7099%09red/hsa:4615%09red/hsa:7187%09red/hsa:7185%09red/hsa:3551%09red/hsa:3553%09red/hsa:8517%09red/hsa:4792%09red/hsa:4790%09red/hsa:329%09red/hsa:472%09red/hsa:7132%09red/hsa:1147%09red/hsa:8717%09red/hsa:8737%09red/hsa:51135%09red/hsa:9020%09red
C-type lectin receptor signaling pathway	KEGG PATHWAY	hsa04625	20	104	4.42e-28	3.86e-26	CASP1|IRF1|PPP3R1|AKT1|NFKBIA|PIK3CD|PRKCD|CASP8|CHUK|IKBKB|MAPK3|AKT2|MAPK1|MAP3K14|PIK3R2|NFKB1|PPP3CA|IL1B|PPP3CB|IKBKG	http://www.genome.jp/kegg-bin/show_pathway?hsa04625/hsa:3551%09red/hsa:5534%09red/hsa:3553%09red/hsa:8517%09red/hsa:5580%09red/hsa:5530%09red/hsa:5532%09red/hsa:5594%09red/hsa:5293%09red/hsa:4792%09red/hsa:5595%09red/hsa:5296%09red/hsa:1147%09red/hsa:4790%09red/hsa:208%09red/hsa:841%09red/hsa:834%09red/hsa:3659%09red/hsa:207%09red/hsa:9020%09red
Toll-like receptor signaling pathway	KEGG PATHWAY	hsa04620	20	104	4.42e-28	3.86e-26	RIPK1|TRAF3|AKT1|NFKBIA|PIK3CD|CD14|CASP8|CHUK|IKBKB|MAPK3|AKT2|MAPK1|PIK3R2|TLR4|MAP2K4|NFKB1|IL1B|MYD88|IRAK4|IKBKG	http://www.genome.jp/kegg-bin/show_pathway?hsa04620/hsa:3551%09red/hsa:3553%09red/hsa:8737%09red/hsa:8517%09red/hsa:5594%09red/hsa:7099%09red/hsa:51135%09red/hsa:5293%09red/hsa:4792%09red/hsa:5595%09red/hsa:5296%09red/hsa:1147%09red/hsa:6416%09red/hsa:208%09red/hsa:841%09red/hsa:4790%09red/hsa:4615%09red/hsa:929%09red/hsa:207%09red/hsa:7187%09red
Toxoplasmosis	KEGG PATHWAY	hsa05145	20	113	1.96e-27	1.64e-25	BCL2L1|TNFRSF1A|STAT3|AKT1|XIAP|NFKBIA|BIRC3|PIK3R5|CASP8|BIRC2|IKBKB|MAPK3|AKT2|MAPK1|CHUK|TLR4|NFKB1|MYD88|IRAK4|IKBKG	http://www.genome.jp/kegg-bin/show_pathway?hsa05145/hsa:3551%09red/hsa:6774%09red/hsa:23533%09red/hsa:8517%09red/hsa:598%09red/hsa:7099%09red/hsa:51135%09red/hsa:4792%09red/hsa:5595%09red/hsa:4790%09red/hsa:1147%09red/hsa:329%09red/hsa:208%09red/hsa:841%09red/hsa:4615%09red/hsa:7132%09red/hsa:331%09red/hsa:330%09red/hsa:207%09red/hsa:5594%09red
Pathways in cancer	KEGG PATHWAY	hsa05200	29	530	6.56e-26	5.02e-24	BCL2L1|CSF2RB|BIRC5|NFKBIA|BIRC3|BIRC2|IKBKB|AKT1|XIAP|IKBKG|STAT3|FAS|BID|PIK3CD|MAPK3|MAPK1|PIK3R2|NFKB1|DAPK2|DAPK1|TRAF1|IGF1R|TRAF3|CHUK|BCL2L11|E2F1|AKT2|CASP8|PRKACA	http://www.genome.jp/kegg-bin/show_pathway?hsa05200/hsa:598%09red/hsa:3480%09red/hsa:5594%09red/hsa:355%09red/hsa:23604%09red/hsa:332%09red/hsa:331%09red/hsa:330%09red/hsa:5578%09red/hsa:1612%09red/hsa:7187%09red/hsa:7185%09red/hsa:3551%09red/hsa:637%09red/hsa:5595%09red/hsa:8517%09red/hsa:5293%09red/hsa:4792%09red/hsa:10018%09red/hsa:5296%09red/hsa:329%09red/hsa:208%09red/hsa:4790%09red/hsa:207%…
PD-L1 expression and PD-1 checkpoint pathway in cancer	KEGG PATHWAY	hsa05235	18	89	1.03e-25	7.26e-24	STAT3|PPP3R1|AKT1|NFKBIA|PIK3CD|CHUK|NFKBIE|IKBKB|MAPK3|AKT2|MAPK1|PIK3R2|TLR4|NFKB1|PPP3CA|PPP3CB|MYD88|IKBKG	http://www.genome.jp/kegg-bin/show_pathway?hsa05235/hsa:3551%09red/hsa:5534%09red/hsa:6774%09red/hsa:8517%09red/hsa:5530%09red/hsa:5532%09red/hsa:7099%09red/hsa:5594%09red/hsa:5293%09red/hsa:4792%09red/hsa:5595%09red/hsa:5296%09red/hsa:1147%09red/hsa:208%09red/hsa:4790%09red/hsa:4615%09red/hsa:207%09red/hsa:4794%09red
MAPK signaling pathway	KEGG PATHWAY	hsa04010	24	295	2.42e-25	1.64e-23	PPP3R1|IKBKB|AKT1|AKT2|IKBKG|MAP2K4|IL1B|FAS|MAP3K1|TRADD|MAPK3|MAPK1|MAP3K14|MYD88|IRAK4|IGF1R|CHUK|IL1RAP|TNFRSF1A|NFKB1|CD14|PRKACA|PPP3CA|PPP3CB	http://www.genome.jp/kegg-bin/show_pathway?hsa04010/hsa:3480%09red/hsa:5595%09red/hsa:5594%09red/hsa:355%09red/hsa:929%09red/hsa:5534%09red/hsa:5530%09red/hsa:5532%09red/hsa:3556%09red/hsa:4615%09red/hsa:3551%09red/hsa:3553%09red/hsa:8517%09red/hsa:5578%09red/hsa:4790%09red/hsa:208%09red/hsa:207%09red/hsa:7132%09red/hsa:1147%09red/hsa:6416%09red/hsa:4214%09red/hsa:8717%09red/hsa:51135%09red/hsa:9…
Necroptosis	KEGG PATHWAY	hsa04217	19	162	5.19e-23	2.65e-21	RIPK1|TNFSF10|STAT3|CASP1|FAS|BID|TNFRSF1A|BIRC3|BIRC2|TRADD|CHMP2B|TNFRSF10B|XIAP|CAPN2|TLR4|CASP8|IL1B|CHMP7|CFLAR	http://www.genome.jp/kegg-bin/show_pathway?hsa04217/hsa:834%09red/hsa:637%09red/hsa:3553%09red/hsa:824%09red/hsa:8737%09red/hsa:7132%09red/hsa:8837%09red/hsa:7099%09red/hsa:6774%09red/hsa:331%09red/hsa:8795%09red/hsa:91782%09red/hsa:329%09red/hsa:355%09red/hsa:8717%09red/hsa:841%09red/hsa:8743%09red/hsa:330%09red/hsa:25978%09red
Platinum drug resistance	KEGG PATHWAY	hsa01524	15	73	1.09e-21	5.12e-20	BCL2L1|XIAP|AKT1|FAS|BIRC5|ATM|BIRC3|BIRC2|CASP8|PIK3CD|MAPK3|AKT2|MAPK1|PIK3R2|BID	http://www.genome.jp/kegg-bin/show_pathway?hsa01524/hsa:637%09red/hsa:5595%09red/hsa:5594%09red/hsa:841%09red/hsa:598%09red/hsa:5293%09red/hsa:5296%09red/hsa:329%09red/hsa:208%09red/hsa:355%09red/hsa:332%09red/hsa:331%09red/hsa:330%09red/hsa:207%09red/hsa:472%09red
Osteoclast differentiation	KEGG PATHWAY	hsa04380	17	128	1.57e-21	7.19e-20	TNFRSF1A|PPP3R1|AKT1|NFKBIA|PIK3CD|CHUK|IKBKB|MAPK3|AKT2|MAPK1|MAP3K14|PIK3R2|NFKB1|PPP3CA|IL1B|PPP3CB|IKBKG	http://www.genome.jp/kegg-bin/show_pathway?hsa04380/hsa:3551%09red/hsa:5534%09red/hsa:3553%09red/hsa:8517%09red/hsa:5530%09red/hsa:5532%09red/hsa:5594%09red/hsa:5293%09red/hsa:4792%09red/hsa:5595%09red/hsa:5296%09red/hsa:1147%09red/hsa:208%09red/hsa:4790%09red/hsa:7132%09red/hsa:207%09red/hsa:9020%09red
T cell receptor signaling pathway	KEGG PATHWAY	hsa04660	16	103	2.57e-21	1.12e-19	PPP3R1|AKT1|NFKBIA|PIK3CD|CHUK|NFKBIE|IKBKB|MAPK3|AKT2|MAPK1|MAP3K14|PIK3R2|NFKB1|PPP3CA|PPP3CB|IKBKG	http://www.genome.jp/kegg-bin/show_pathway?hsa04660/hsa:3551%09red/hsa:5534%09red/hsa:5595%09red/hsa:8517%09red/hsa:5530%09red/hsa:5532%09red/hsa:5594%09red/hsa:5293%09red/hsa:4792%09red/hsa:5296%09red/hsa:1147%09red/hsa:208%09red/hsa:4790%09red/hsa:207%09red/hsa:4794%09red/hsa:9020%09red
B cell receptor signaling pathway	KEGG PATHWAY	hsa04662	15	82	5.18e-21	2.21e-19	PPP3R1|AKT1|NFKBIA|PIK3CD|CHUK|NFKBIE|IKBKB|MAPK3|AKT2|MAPK1|PIK3R2|NFKB1|PPP3CA|PPP3CB|IKBKG	http://www.genome.jp/kegg-bin/show_pathway?hsa04662/hsa:3551%09red/hsa:5534%09red/hsa:5595%09red/hsa:8517%09red/hsa:5530%09red/hsa:5532%09red/hsa:5594%09red/hsa:5293%09red/hsa:4792%09red/hsa:5296%09red/hsa:1147%09red/hsa:208%09red/hsa:4790%09red/hsa:207%09red/hsa:4794%09red
PI3K-Akt signaling pathway	KEGG PATHWAY	hsa04151	21	354	1.34e-19	4.93e-18	BCL2L1|YWHAZ|IGF1R|BCL2L11|TSC1|AKT1|PIK3CD|PIK3R5|CHUK|IKBKB|MAPK3|AKT2|MAPK1|PRKACA|PIK3R2|TLR4|YWHAB|NFKB1|MCL1|PAK2|IKBKG	http://www.genome.jp/kegg-bin/show_pathway?hsa04151/hsa:3551%09red/hsa:5578%09red/hsa:5595%09red/hsa:23533%09red/hsa:4170%09red/hsa:7534%09red/hsa:7529%09red/hsa:5293%09red/hsa:598%09red/hsa:5586%09red/hsa:5296%09red/hsa:1147%09red/hsa:208%09red/hsa:207%09red/hsa:4790%09red/hsa:8517%09red/hsa:7099%09red/hsa:5594%09red/hsa:3480%09red/hsa:7248%09red/hsa:10018%09red
Th17 cell differentiation	KEGG PATHWAY	hsa04659	15	107	1.92e-19	6.9e-18	STAT3|PPP3R1|IRF4|NFKB1|NFKBIA|CHUK|NFKBIE|IKBKB|MAPK3|MAPK1|IKBKG|IL1RAP|PPP3CA|IL1B|PPP3CB	http://www.genome.jp/kegg-bin/show_pathway?hsa04659/hsa:3551%09red/hsa:5534%09red/hsa:6774%09red/hsa:8517%09red/hsa:5530%09red/hsa:3556%09red/hsa:4794%09red/hsa:5532%09red/hsa:4792%09red/hsa:5595%09red/hsa:4790%09red/hsa:1147%09red/hsa:5594%09red/hsa:3553%09red/hsa:3662%09red
mTOR signaling pathway	KEGG PATHWAY	hsa04150	16	153	8.42e-19	2.81e-17	IGF1R|RRAGC|AKT1|RRAGB|PIK3CD|CHUK|AKT1S1|IKBKB|MAPK3|AKT2|MAPK1|PRKACA|PIK3R2|LAMTOR4|TSC1|TNFRSF1A	http://www.genome.jp/kegg-bin/show_pathway?hsa04150/hsa:3551%09red/hsa:5578%09red/hsa:5595%09red/hsa:5293%09red/hsa:10325%09red/hsa:84335%09red/hsa:5594%09red/hsa:3480%09red/hsa:7132%09red/hsa:5296%09red/hsa:64121%09red/hsa:208%09red/hsa:389541%09red/hsa:1147%09red/hsa:207%09red/hsa:7248%09red
Adipocytokine signaling pathway	KEGG PATHWAY	hsa04920	13	69	1.65e-18	5.13e-17	PRKAG2|TNFRSF1B|TNFRSF1A|NFKBIA|CHUK|TRADD|NFKBIE|IKBKB|AKT1|AKT2|IKBKG|NFKB1|STAT3	http://www.genome.jp/kegg-bin/show_pathway?hsa04920/hsa:3551%09red/hsa:6774%09red/hsa:8517%09red/hsa:4792%09red/hsa:4794%09red/hsa:7133%09red/hsa:7132%09red/hsa:4790%09red/hsa:1147%09red/hsa:51422%09red/hsa:208%09red/hsa:8717%09red/hsa:207%09red
FoxO signaling pathway	KEGG PATHWAY	hsa04068	15	132	3.43e-18	1.03e-16	IGF1R|TNFSF10|STAT3|GABARAPL2|ATM|PIK3CD|CHUK|IKBKB|MAPK3|AKT2|MAPK1|AKT1|PIK3R2|PRKAG2|BCL2L11	http://www.genome.jp/kegg-bin/show_pathway?hsa04068/hsa:3551%09red/hsa:6774%09red/hsa:5293%09red/hsa:10018%09red/hsa:5594%09red/hsa:3480%09red/hsa:5595%09red/hsa:5296%09red/hsa:11345%09red/hsa:51422%09red/hsa:208%09red/hsa:8743%09red/hsa:1147%09red/hsa:207%09red/hsa:472%09red
Herpes simplex virus 1 infection	KEGG PATHWAY	hsa05168	22	492	5.23e-18	1.5e-16	BCL2L1|NFKBIA|BIRC3|BIRC2|IKBKB|AKT1|AKT2|IKBKG|IL1B|TSC1|FAS|BID|PIK3CD|TRADD|PIK3R2|NFKB1|MYD88|IRAK4|TRAF3|CHUK|TNFRSF1A|CASP8	http://www.genome.jp/kegg-bin/show_pathway?hsa05168/hsa:598%09red/hsa:355%09red/hsa:330%09red/hsa:7248%09red/hsa:4615%09red/hsa:7187%09red/hsa:3551%09red/hsa:637%09red/hsa:3553%09red/hsa:8517%09red/hsa:5293%09red/hsa:4792%09red/hsa:5296%09red/hsa:329%09red/hsa:208%09red/hsa:4790%09red/hsa:207%09red/hsa:7132%09red/hsa:1147%09red/hsa:8717%09red/hsa:841%09red/hsa:51135%09red
Apoptosis - multiple species	KEGG PATHWAY	hsa04215	10	33	2.58e-16	6.66e-15	BCL2L1|BCL2L11|TNFRSF1A|BID|BIRC3|BIRC2|CASP8|XIAP|BOK|BIRC5	http://www.genome.jp/kegg-bin/show_pathway?hsa04215/hsa:637%09red/hsa:598%09red/hsa:666%09red/hsa:7132%09red/hsa:10018%09red/hsa:329%09red/hsa:841%09red/hsa:332%09red/hsa:331%09red/hsa:330%09red
Neurotrophin signaling pathway	KEGG PATHWAY	hsa04722	13	119	1.03e-15	2.56e-14	NFKBIA|AKT1|MAP3K1|PIK3CD|PRKCD|NFKBIE|IKBKB|MAPK3|AKT2|MAPK1|PIK3R2|NFKB1|IRAK4	http://www.genome.jp/kegg-bin/show_pathway?hsa04722/hsa:3551%09red/hsa:5595%09red/hsa:5594%09red/hsa:5580%09red/hsa:51135%09red/hsa:4794%09red/hsa:5293%09red/hsa:4792%09red/hsa:5296%09red/hsa:208%09red/hsa:4790%09red/hsa:207%09red/hsa:4214%09red
Cellular senescence	KEGG PATHWAY	hsa04218	14	160	1.37e-15	3.31e-14	E2F1|PPP3R1|AKT1|ATM|PIK3CD|MAPK3|AKT2|MAPK1|PIK3R2|NFKB1|PPP3CA|PPP3CB|TSC1|CAPN2	http://www.genome.jp/kegg-bin/show_pathway?hsa04218/hsa:5534%09red/hsa:5595%09red/hsa:824%09red/hsa:5530%09red/hsa:5532%09red/hsa:5594%09red/hsa:5293%09red/hsa:7248%09red/hsa:5296%09red/hsa:208%09red/hsa:4790%09red/hsa:1869%09red/hsa:207%09red/hsa:472%09red
Chemokine signaling pathway	KEGG PATHWAY	hsa04062	14	190	1.27e-14	2.87e-13	STAT3|AKT1|NFKBIA|PIK3CD|PRKCD|CHUK|IKBKB|MAPK3|AKT2|MAPK1|PIK3R2|PIK3R5|NFKB1|IKBKG	http://www.genome.jp/kegg-bin/show_pathway?hsa04062/hsa:3551%09red/hsa:6774%09red/hsa:23533%09red/hsa:5580%09red/hsa:5594%09red/hsa:5293%09red/hsa:4792%09red/hsa:5595%09red/hsa:5296%09red/hsa:1147%09red/hsa:208%09red/hsa:4790%09red/hsa:8517%09red/hsa:207%09red
EGFR tyrosine kinase inhibitor resistance	KEGG PATHWAY	hsa01521	11	79	1.54e-14	3.33e-13	BCL2L1|IGF1R|STAT3|AKT1|PIK3CD|MAPK3|AKT2|MAPK1|PRKACA|PIK3R2|BCL2L11	http://www.genome.jp/kegg-bin/show_pathway?hsa01521/hsa:5578%09red/hsa:6774%09red/hsa:5293%09red/hsa:598%09red/hsa:5594%09red/hsa:3480%09red/hsa:5595%09red/hsa:5296%09red/hsa:10018%09red/hsa:208%09red/hsa:207%09red
VEGF signaling pathway	KEGG PATHWAY	hsa04370	10	59	4.24e-14	8.84e-13	PPP3R1|AKT1|PIK3CD|MAPK3|AKT2|MAPK1|PRKACA|PIK3R2|PPP3CA|PPP3CB	http://www.genome.jp/kegg-bin/show_pathway?hsa04370/hsa:5534%09red/hsa:5595%09red/hsa:5594%09red/hsa:5530%09red/hsa:5578%09red/hsa:5293%09red/hsa:5296%09red/hsa:208%09red/hsa:5532%09red/hsa:207%09red
Th1 and Th2 cell differentiation	KEGG PATHWAY	hsa04658	11	92	7.13e-14	1.44e-12	PPP3R1|NFKBIA|CHUK|NFKBIE|IKBKB|MAPK3|MAPK1|IKBKG|NFKB1|PPP3CA|PPP3CB	http://www.genome.jp/kegg-bin/show_pathway?hsa04658/hsa:3551%09red/hsa:5534%09red/hsa:5595%09red/hsa:8517%09red/hsa:5530%09red/hsa:5532%09red/hsa:4794%09red/hsa:4792%09red/hsa:4790%09red/hsa:1147%09red/hsa:5594%09red
IL-17 signaling pathway	KEGG PATHWAY	hsa04657	11	93	7.95e-14	1.59e-12	TRAF3|NFKBIA|CHUK|TRADD|IKBKB|MAPK3|MAPK1|IKBKG|NFKB1|CASP8|IL1B	http://www.genome.jp/kegg-bin/show_pathway?hsa04657/hsa:3551%09red/hsa:3553%09red/hsa:8517%09red/hsa:4792%09red/hsa:5595%09red/hsa:4790%09red/hsa:1147%09red/hsa:5594%09red/hsa:841%09red/hsa:8717%09red/hsa:7187%09red
Natural killer cell mediated cytotoxicity	KEGG PATHWAY	hsa04650	12	131	9.49e-14	1.87e-12	TNFSF10|PPP3R1|TNFRSF10B|FAS|BID|PIK3CD|MAPK3|MAPK1|PRKACA|PIK3R2|PPP3CA|PPP3CB	http://www.genome.jp/kegg-bin/show_pathway?hsa04650/hsa:5534%09red/hsa:5595%09red/hsa:5594%09red/hsa:5530%09red/hsa:5578%09red/hsa:5293%09red/hsa:5296%09red/hsa:8795%09red/hsa:637%09red/hsa:355%09red/hsa:5532%09red/hsa:8743%09red
AGE-RAGE signaling pathway in diabetic complications	KEGG PATHWAY	hsa04933	11	100	1.65e-13	3.16e-12	STAT3|AKT1|PIK3CD|PRKCD|MAPK3|AKT2|MAPK1|PRKACA|PIK3R2|NFKB1|IL1B	http://www.genome.jp/kegg-bin/show_pathway?hsa04933/hsa:5578%09red/hsa:6774%09red/hsa:5594%09red/hsa:5580%09red/hsa:5293%09red/hsa:5595%09red/hsa:3553%09red/hsa:5296%09red/hsa:208%09red/hsa:4790%09red/hsa:207%09red
RIG-I-like receptor signaling pathway	KEGG PATHWAY	hsa04622	10	70	1.99e-13	3.73e-12	RIPK1|NFKBIA|MAP3K1|CHUK|TRADD|IKBKB|TRAF3|IKBKG|NFKB1|CASP8	http://www.genome.jp/kegg-bin/show_pathway?hsa04622/hsa:3551%09red/hsa:8517%09red/hsa:4792%09red/hsa:4790%09red/hsa:1147%09red/hsa:4214%09red/hsa:841%09red/hsa:8717%09red/hsa:8737%09red/hsa:7187%09red
Insulin resistance	KEGG PATHWAY	hsa04931	11	108	3.6e-13	6.54e-12	PRKAG2|STAT3|TNFRSF1A|NFKBIA|PIK3CD|PRKCD|IKBKB|AKT1|AKT2|PIK3R2|NFKB1	http://www.genome.jp/kegg-bin/show_pathway?hsa04931/hsa:3551%09red/hsa:6774%09red/hsa:5580%09red/hsa:5293%09red/hsa:4792%09red/hsa:7132%09red/hsa:5296%09red/hsa:51422%09red/hsa:208%09red/hsa:4790%09red/hsa:207%09red
HIF-1 signaling pathway	KEGG PATHWAY	hsa04066	11	109	3.95e-13	7.11e-12	IGF1R|STAT3|AKT1|PIK3CD|MAPK3|AKT2|MAPK1|PRKACA|PIK3R2|TLR4|NFKB1	http://www.genome.jp/kegg-bin/show_pathway?hsa04066/hsa:5578%09red/hsa:6774%09red/hsa:5293%09red/hsa:7099%09red/hsa:5594%09red/hsa:3480%09red/hsa:5595%09red/hsa:5296%09red/hsa:208%09red/hsa:4790%09red/hsa:207%09red
Sphingolipid signaling pathway	KEGG PATHWAY	hsa04071	11	119	9.61e-13	1.63e-11	AKT1|BID|TNFRSF1A|PIK3CD|TRADD|MAPK3|AKT2|MAPK1|PRKACA|PIK3R2|NFKB1	http://www.genome.jp/kegg-bin/show_pathway?hsa04071/hsa:637%09red/hsa:5595%09red/hsa:5594%09red/hsa:5578%09red/hsa:5293%09red/hsa:7132%09red/hsa:5296%09red/hsa:4790%09red/hsa:208%09red/hsa:8717%09red/hsa:207%09red
Ras signaling pathway	KEGG PATHWAY	hsa04014	13	232	3.09e-12	5.06e-11	BCL2L1|IGF1R|AKT1|PIK3CD|CHUK|IKBKB|MAPK3|AKT2|MAPK1|PRKACA|PIK3R2|NFKB1|IKBKG	http://www.genome.jp/kegg-bin/show_pathway?hsa04014/hsa:3551%09red/hsa:5578%09red/hsa:5595%09red/hsa:5293%09red/hsa:598%09red/hsa:5594%09red/hsa:3480%09red/hsa:5296%09red/hsa:1147%09red/hsa:208%09red/hsa:4790%09red/hsa:8517%09red/hsa:207%09red
Prolactin signaling pathway	KEGG PATHWAY	hsa04917	9	70	7.84e-12	1.21e-10	IRF1|STAT3|MAPK3|PIK3CD|AKT1|AKT2|MAPK1|PIK3R2|NFKB1	http://www.genome.jp/kegg-bin/show_pathway?hsa04917/hsa:6774%09red/hsa:5594%09red/hsa:208%09red/hsa:5293%09red/hsa:5595%09red/hsa:5296%09red/hsa:3659%09red/hsa:4790%09red/hsa:207%09red
Focal adhesion	KEGG PATHWAY	hsa04510	12	199	9.72e-12	1.49e-10	IGF1R|AKT1|PIK3CD|XIAP|BIRC3|BIRC2|MAPK3|AKT2|MAPK1|PRKACA|PIK3R2|CAPN2	http://www.genome.jp/kegg-bin/show_pathway?hsa04510/hsa:5578%09red/hsa:5595%09red/hsa:5293%09red/hsa:5594%09red/hsa:3480%09red/hsa:5296%09red/hsa:329%09red/hsa:208%09red/hsa:331%09red/hsa:330%09red/hsa:207%09red/hsa:824%09red
Longevity regulating pathway	KEGG PATHWAY	hsa04211	9	89	5.68e-11	7.6e-10	IGF1R|PRKAG2|PIK3CD|AKT1|AKT2|AKT1S1|PIK3R2|NFKB1|TSC1	http://www.genome.jp/kegg-bin/show_pathway?hsa04211/hsa:5293%09red/hsa:84335%09red/hsa:3480%09red/hsa:7248%09red/hsa:5296%09red/hsa:51422%09red/hsa:208%09red/hsa:4790%09red/hsa:207%09red
Relaxin signaling pathway	KEGG PATHWAY	hsa04926	10	130	5.84e-11	7.76e-10	AKT1|NFKBIA|PIK3CD|MAPK3|AKT2|MAPK1|PRKACA|PIK3R2|MAP2K4|NFKB1	http://www.genome.jp/kegg-bin/show_pathway?hsa04926/hsa:5578%09red/hsa:5595%09red/hsa:5594%09red/hsa:5293%09red/hsa:4792%09red/hsa:5296%09red/hsa:6416%09red/hsa:208%09red/hsa:4790%09red/hsa:207%09red
Fc gamma R-mediated phagocytosis	KEGG PATHWAY	hsa04666	9	94	8.93e-11	1.15e-09	AKT1|PIK3CD|PRKCD|MAPK3|AKT2|MAPK1|PRKACA|PIK3R2|GSN	http://www.genome.jp/kegg-bin/show_pathway?hsa04666/hsa:2934%09red/hsa:5578%09red/hsa:5595%09red/hsa:5594%09red/hsa:5580%09red/hsa:5293%09red/hsa:5296%09red/hsa:208%09red/hsa:207%09red
Insulin signaling pathway	KEGG PATHWAY	hsa04910	10	137	9.47e-11	1.21e-09	AKT1|PRKAG2|PIK3CD|IKBKB|MAPK3|AKT2|MAPK1|PIK3R2|TSC1|PRKAR1A	http://www.genome.jp/kegg-bin/show_pathway?hsa04910/hsa:3551%09red/hsa:5595%09red/hsa:5594%09red/hsa:5573%09red/hsa:5293%09red/hsa:7248%09red/hsa:5296%09red/hsa:51422%09red/hsa:208%09red/hsa:207%09red
Cytosolic DNA-sensing pathway	KEGG PATHWAY	hsa04623	8	63	1.29e-10	1.64e-09	RIPK1|CASP1|NFKBIA|CHUK|IKBKB|IKBKG|NFKB1|IL1B	http://www.genome.jp/kegg-bin/show_pathway?hsa04623/hsa:3551%09red/hsa:834%09red/hsa:3553%09red/hsa:8517%09red/hsa:4792%09red/hsa:4790%09red/hsa:1147%09red/hsa:8737%09red
Mitophagy - animal	KEGG PATHWAY	hsa04137	8	65	1.62e-10	2.03e-09	BCL2L1|FUNDC1|BNIP3L|E2F1|GABARAPL2|MFN1|PINK1|ATG9A	http://www.genome.jp/kegg-bin/show_pathway?hsa04137/hsa:139341%09red/hsa:598%09red/hsa:665%09red/hsa:11345%09red/hsa:79065%09red/hsa:55669%09red/hsa:1869%09red/hsa:65018%09red
Proteoglycans in cancer	KEGG PATHWAY	hsa05205	11	203	2.16e-10	2.68e-09	IGF1R|STAT3|AKT1|FAS|PIK3CD|MAPK3|AKT2|MAPK1|PRKACA|PIK3R2|TLR4	http://www.genome.jp/kegg-bin/show_pathway?hsa05205/hsa:5578%09red/hsa:6774%09red/hsa:5293%09red/hsa:7099%09red/hsa:5594%09red/hsa:3480%09red/hsa:5595%09red/hsa:5296%09red/hsa:208%09red/hsa:355%09red/hsa:207%09red
Fc epsilon RI signaling pathway	KEGG PATHWAY	hsa04664	8	68	2.26e-10	2.78e-09	AKT1|PIK3CD|MAPK3|AKT2|MAPK1|PRKACA|PIK3R2|MAP2K4	http://www.genome.jp/kegg-bin/show_pathway?hsa04664/hsa:5578%09red/hsa:5595%09red/hsa:5594%09red/hsa:5293%09red/hsa:5296%09red/hsa:6416%09red/hsa:208%09red/hsa:207%09red
Phagosome	KEGG PATHWAY	hsa04145	10	152	2.47e-10	3e-09	DYNC1LI2|TUBB6|TUBB4B|TUBA1A|TUBB1|CD14|DYNC1LI1|TLR4|DYNC1H1|LAMP2	http://www.genome.jp/kegg-bin/show_pathway?hsa04145/hsa:81027%09red/hsa:7099%09red/hsa:1778%09red/hsa:51143%09red/hsa:3920%09red/hsa:10383%09red/hsa:1783%09red/hsa:84617%09red/hsa:929%09red/hsa:7846%09red
Proteasome	KEGG PATHWAY	hsa03050	7	45	5.31e-10	6.17e-09	PSMB10|PSME4|PSMD12|PSMB9|PSMB8|PSMB3|PSMF1	http://www.genome.jp/kegg-bin/show_pathway?hsa03050/hsa:9491%09red/hsa:23198%09red/hsa:5698%09red/hsa:5699%09red/hsa:5718%09red/hsa:5696%09red/hsa:5691%09red
ErbB signaling pathway	KEGG PATHWAY	hsa04012	8	85	1.16e-09	1.3e-08	AKT1|PIK3CD|MAPK3|AKT2|MAPK1|PRKACA|PIK3R2|MAP2K4	http://www.genome.jp/kegg-bin/show_pathway?hsa04012/hsa:5578%09red/hsa:5595%09red/hsa:5594%09red/hsa:5293%09red/hsa:5296%09red/hsa:6416%09red/hsa:208%09red/hsa:207%09red
Endocrine resistance	KEGG PATHWAY	hsa01522	8	98	3.32e-09	3.54e-08	IGF1R|E2F1|AKT1|PIK3CD|MAPK3|AKT2|MAPK1|PIK3R2	http://www.genome.jp/kegg-bin/show_pathway?hsa01522/hsa:5595%09red/hsa:5293%09red/hsa:5594%09red/hsa:3480%09red/hsa:5296%09red/hsa:208%09red/hsa:1869%09red/hsa:207%09red
Choline metabolism in cancer	KEGG PATHWAY	hsa05231	8	99	3.58e-09	3.79e-08	AKT1|PIK3CD|MAPK3|AKT2|MAPK1|PRKACA|PIK3R2|TSC1	http://www.genome.jp/kegg-bin/show_pathway?hsa05231/hsa:5578%09red/hsa:5595%09red/hsa:5594%09red/hsa:5293%09red/hsa:7248%09red/hsa:5296%09red/hsa:208%09red/hsa:207%09red
Phospholipase D signaling pathway	KEGG PATHWAY	hsa04072	9	148	3.85e-09	4.06e-08	AKT1|PIK3CD|PIK3R5|MAPK3|AKT2|MAPK1|PRKACA|PIK3R2|TSC1	http://www.genome.jp/kegg-bin/show_pathway?hsa04072/hsa:5578%09red/hsa:5595%09red/hsa:23533%09red/hsa:5594%09red/hsa:5293%09red/hsa:7248%09red/hsa:5296%09red/hsa:208%09red/hsa:207%09red
Longevity regulating pathway - multiple species	KEGG PATHWAY	hsa04213	7	62	4.08e-09	4.28e-08	IGF1R|PRKAG2|PIK3CD|AKT1|AKT2|AKT1S1|PIK3R2	http://www.genome.jp/kegg-bin/show_pathway?hsa04213/hsa:5293%09red/hsa:84335%09red/hsa:3480%09red/hsa:5296%09red/hsa:51422%09red/hsa:208%09red/hsa:207%09red
Cytokine-cytokine receptor interaction	KEGG PATHWAY	hsa04060	11	294	8.88e-09	8.87e-08	CSF2RB|TNFSF10|TNFRSF1B|TNFRSF1A|FAS|TNFRSF10D|TNFRSF10C|TNFRSF10B|TNFRSF25|IL1RAP|IL1B	http://www.genome.jp/kegg-bin/show_pathway?hsa04060/hsa:3553%09red/hsa:3556%09red/hsa:1439%09red/hsa:7133%09red/hsa:7132%09red/hsa:8794%09red/hsa:8795%09red/hsa:355%09red/hsa:8793%09red/hsa:8743%09red/hsa:8718%09red
Cholinergic synapse	KEGG PATHWAY	hsa04725	8	112	8.88e-09	8.87e-08	AKT1|PIK3CD|PIK3R5|MAPK3|AKT2|MAPK1|PRKACA|PIK3R2	http://www.genome.jp/kegg-bin/show_pathway?hsa04725/hsa:5578%09red/hsa:5595%09red/hsa:23533%09red/hsa:5594%09red/hsa:5293%09red/hsa:5296%09red/hsa:208%09red/hsa:207%09red
Epithelial cell signaling in Helicobacter pylori infection	KEGG PATHWAY	hsa05120	7	70	8.9e-09	8.87e-08	NFKBIA|CHUK|IKBKB|MAP3K14|IKBKG|MAP2K4|NFKB1	http://www.genome.jp/kegg-bin/show_pathway?hsa05120/hsa:3551%09red/hsa:8517%09red/hsa:4792%09red/hsa:4790%09red/hsa:1147%09red/hsa:6416%09red/hsa:9020%09red
MicroRNAs in cancer	KEGG PATHWAY	hsa05206	11	299	1.05e-08	1.04e-07	STAT3|E2F1|ATM|VIM|IKBKB|MAPK1|PRKACA|PIK3R2|NFKB1|BCL2L11|MCL1	http://www.genome.jp/kegg-bin/show_pathway?hsa05206/hsa:3551%09red/hsa:5578%09red/hsa:6774%09red/hsa:5594%09red/hsa:4170%09red/hsa:10018%09red/hsa:5296%09red/hsa:7431%09red/hsa:4790%09red/hsa:1869%09red/hsa:472%09red
Thyroid hormone signaling pathway	KEGG PATHWAY	hsa04919	8	119	1.39e-08	1.36e-07	AKT1|PIK3CD|MAPK3|AKT2|MAPK1|PRKACA|PIK3R2|OPA1	http://www.genome.jp/kegg-bin/show_pathway?hsa04919/hsa:5578%09red/hsa:5595%09red/hsa:5594%09red/hsa:5293%09red/hsa:5296%09red/hsa:208%09red/hsa:9968%09red/hsa:207%09red
AMPK signaling pathway	KEGG PATHWAY	hsa04152	8	120	1.48e-08	1.43e-07	IGF1R|PRKAG2|PIK3CD|AKT1|AKT2|AKT1S1|PIK3R2|TSC1	http://www.genome.jp/kegg-bin/show_pathway?hsa04152/hsa:5293%09red/hsa:84335%09red/hsa:3480%09red/hsa:7248%09red/hsa:5296%09red/hsa:51422%09red/hsa:208%09red/hsa:207%09red
Oocyte meiosis	KEGG PATHWAY	hsa04114	8	128	2.38e-08	2.24e-07	YWHAZ|IGF1R|PPP3R1|MAPK3|MAPK1|YWHAB|PPP3CA|PPP3CB	http://www.genome.jp/kegg-bin/show_pathway?hsa04114/hsa:5534%09red/hsa:5595%09red/hsa:5594%09red/hsa:5530%09red/hsa:7534%09red/hsa:7529%09red/hsa:3480%09red/hsa:5532%09red
Type II diabetes mellitus	KEGG PATHWAY	hsa04930	6	46	2.48e-08	2.32e-07	PIK3CD|PRKCD|IKBKB|MAPK3|MAPK1|PIK3R2	http://www.genome.jp/kegg-bin/show_pathway?hsa04930/hsa:3551%09red/hsa:5595%09red/hsa:5594%09red/hsa:5580%09red/hsa:5293%09red/hsa:5296%09red
Gap junction	KEGG PATHWAY	hsa04540	7	88	3.89e-08	3.55e-07	TUBB6|TUBB4B|TUBA1A|TUBB1|MAPK3|MAPK1|PRKACA	http://www.genome.jp/kegg-bin/show_pathway?hsa04540/hsa:5578%09red/hsa:5595%09red/hsa:5594%09red/hsa:81027%09red/hsa:10383%09red/hsa:7846%09red/hsa:84617%09red
Signaling pathways regulating pluripotency of stem cells	KEGG PATHWAY	hsa04550	8	140	4.6e-08	4.18e-07	IGF1R|STAT3|AKT1|PIK3CD|MAPK3|AKT2|MAPK1|PIK3R2	http://www.genome.jp/kegg-bin/show_pathway?hsa04550/hsa:6774%09red/hsa:5293%09red/hsa:5594%09red/hsa:3480%09red/hsa:5595%09red/hsa:5296%09red/hsa:208%09red/hsa:207%09red
Progesterone-mediated oocyte maturation	KEGG PATHWAY	hsa04914	7	99	8.31e-08	7.29e-07	IGF1R|AKT1|PIK3CD|MAPK3|AKT2|MAPK1|PIK3R2	http://www.genome.jp/kegg-bin/show_pathway?hsa04914/hsa:5595%09red/hsa:5293%09red/hsa:5594%09red/hsa:3480%09red/hsa:5296%09red/hsa:208%09red/hsa:207%09red
Oxytocin signaling pathway	KEGG PATHWAY	hsa04921	8	153	8.83e-08	7.66e-07	PPP3R1|PRKAG2|MAPK3|PIK3R5|MAPK1|PRKACA|PPP3CA|PPP3CB	http://www.genome.jp/kegg-bin/show_pathway?hsa04921/hsa:5534%09red/hsa:5595%09red/hsa:23533%09red/hsa:5530%09red/hsa:5532%09red/hsa:51422%09red/hsa:5594%09red/hsa:5578%09red
Endometrial cancer	KEGG PATHWAY	hsa05213	6	58	8.84e-08	7.66e-07	AKT1|PIK3CD|MAPK3|AKT2|MAPK1|PIK3R2	http://www.genome.jp/kegg-bin/show_pathway?hsa05213/hsa:5595%09red/hsa:5594%09red/hsa:5293%09red/hsa:5296%09red/hsa:208%09red/hsa:207%09red
Jak-STAT signaling pathway	KEGG PATHWAY	hsa04630	8	162	1.34e-07	1.13e-06	BCL2L1|CSF2RB|STAT3|PIK3CD|AKT1|AKT2|PIK3R2|MCL1	http://www.genome.jp/kegg-bin/show_pathway?hsa04630/hsa:6774%09red/hsa:4170%09red/hsa:598%09red/hsa:1439%09red/hsa:5293%09red/hsa:5296%09red/hsa:208%09red/hsa:207%09red
Antifolate resistance	KEGG PATHWAY	hsa01523	5	31	1.47e-07	1.22e-06	IKBKB|NFKB1|IL1B|CHUK|IKBKG	http://www.genome.jp/kegg-bin/show_pathway?hsa01523/hsa:3551%09red/hsa:3553%09red/hsa:8517%09red/hsa:4790%09red/hsa:1147%09red
cGMP-PKG signaling pathway	KEGG PATHWAY	hsa04022	8	167	1.68e-07	1.37e-06	PPP3R1|AKT1|PIK3R5|MAPK3|AKT2|MAPK1|PPP3CA|PPP3CB	http://www.genome.jp/kegg-bin/show_pathway?hsa04022/hsa:5534%09red/hsa:5595%09red/hsa:23533%09red/hsa:5530%09red/hsa:5532%09red/hsa:5594%09red/hsa:208%09red/hsa:207%09red
Autophagy - other	KEGG PATHWAY	hsa04136	5	32	1.69e-07	1.37e-06	WIPI2|ATG9A|ATG4D|ATG7|GABARAPL2	http://www.genome.jp/kegg-bin/show_pathway?hsa04136/hsa:79065%09red/hsa:84971%09red/hsa:10533%09red/hsa:26100%09red/hsa:11345%09red
Long-term potentiation	KEGG PATHWAY	hsa04720	6	67	1.96e-07	1.58e-06	PPP3R1|MAPK3|MAPK1|PRKACA|PPP3CA|PPP3CB	http://www.genome.jp/kegg-bin/show_pathway?hsa04720/hsa:5534%09red/hsa:5595%09red/hsa:5594%09red/hsa:5530%09red/hsa:5532%09red/hsa:5578%09red
Renal cell carcinoma	KEGG PATHWAY	hsa05211	6	69	2.3e-07	1.84e-06	AKT1|PIK3CD|MAPK3|AKT2|MAPK1|PIK3R2	http://www.genome.jp/kegg-bin/show_pathway?hsa05211/hsa:5595%09red/hsa:5594%09red/hsa:5293%09red/hsa:5296%09red/hsa:208%09red/hsa:207%09red
Central carbon metabolism in cancer	KEGG PATHWAY	hsa05230	6	69	2.3e-07	1.84e-06	AKT1|PIK3CD|MAPK3|AKT2|MAPK1|PIK3R2	http://www.genome.jp/kegg-bin/show_pathway?hsa05230/hsa:5595%09red/hsa:5594%09red/hsa:5293%09red/hsa:5296%09red/hsa:208%09red/hsa:207%09red
p53 signaling pathway	KEGG PATHWAY	hsa04115	6	72	2.91e-07	2.25e-06	BCL2L1|FAS|BID|ATM|CASP8|TNFRSF10B	http://www.genome.jp/kegg-bin/show_pathway?hsa04115/hsa:637%09red/hsa:598%09red/hsa:8795%09red/hsa:355%09red/hsa:841%09red/hsa:472%09red
Axon guidance	KEGG PATHWAY	hsa04360	8	181	3.02e-07	2.32e-06	PPP3R1|PIK3CD|MAPK3|MAPK1|PRKACA|PIK3R2|PPP3CA|PPP3CB	http://www.genome.jp/kegg-bin/show_pathway?hsa04360/hsa:5534%09red/hsa:5595%09red/hsa:5594%09red/hsa:5530%09red/hsa:5578%09red/hsa:5293%09red/hsa:5296%09red/hsa:5532%09red
Aldosterone-regulated sodium reabsorption	KEGG PATHWAY	hsa04960	5	37	3.25e-07	2.48e-06	MAPK3|MAPK1|PRKACA|PIK3R2|PIK3CD	http://www.genome.jp/kegg-bin/show_pathway?hsa04960/hsa:5578%09red/hsa:5595%09red/hsa:5293%09red/hsa:5594%09red/hsa:5296%09red
Platelet activation	KEGG PATHWAY	hsa04611	7	124	3.55e-07	2.69e-06	AKT1|PIK3CD|PIK3R5|MAPK3|AKT2|MAPK1|PIK3R2	http://www.genome.jp/kegg-bin/show_pathway?hsa04611/hsa:5595%09red/hsa:23533%09red/hsa:5594%09red/hsa:5293%09red/hsa:5296%09red/hsa:208%09red/hsa:207%09red
Transcriptional misregulation in cancer	KEGG PATHWAY	hsa05202	8	186	3.68e-07	2.78e-06	BCL2L1|TRAF1|IGF1R|ATM|BIRC3|ELANE|CD14|NFKB1	http://www.genome.jp/kegg-bin/show_pathway?hsa05202/hsa:929%09red/hsa:1991%09red/hsa:598%09red/hsa:3480%09red/hsa:4790%09red/hsa:330%09red/hsa:472%09red/hsa:7185%09red
Bladder cancer	KEGG PATHWAY	hsa05219	5	41	5.19e-07	3.88e-06	MAPK3|MAPK1|E2F1|DAPK1|DAPK2	http://www.genome.jp/kegg-bin/show_pathway?hsa05219/hsa:23604%09red/hsa:1612%09red/hsa:5594%09red/hsa:5595%09red/hsa:1869%09red
Apelin signaling pathway	KEGG PATHWAY	hsa04371	7	137	6.73e-07	4.94e-06	AKT1|PRKAG2|PIK3R5|MAPK3|AKT2|MAPK1|GABARAPL2	http://www.genome.jp/kegg-bin/show_pathway?hsa04371/hsa:5595%09red/hsa:23533%09red/hsa:5594%09red/hsa:11345%09red/hsa:51422%09red/hsa:208%09red/hsa:207%09red
Estrogen signaling pathway	KEGG PATHWAY	hsa04915	7	138	7.05e-07	5.15e-06	AKT1|PIK3CD|PRKCD|MAPK3|AKT2|MAPK1|PIK3R2	http://www.genome.jp/kegg-bin/show_pathway?hsa04915/hsa:5595%09red/hsa:5594%09red/hsa:5580%09red/hsa:5293%09red/hsa:5296%09red/hsa:208%09red/hsa:207%09red
Rap1 signaling pathway	KEGG PATHWAY	hsa04015	8	210	8.89e-07	6.37e-06	IGF1R|AKT1|PIK3CD|MAPK3|AKT2|MAPK1|PRKACA|PIK3R2	http://www.genome.jp/kegg-bin/show_pathway?hsa04015/hsa:5578%09red/hsa:5595%09red/hsa:5293%09red/hsa:5594%09red/hsa:3480%09red/hsa:5296%09red/hsa:208%09red/hsa:207%09red
cAMP signaling pathway	KEGG PATHWAY	hsa04024	8	214	1.02e-06	7.25e-06	AKT1|NFKBIA|PIK3CD|MAPK3|AKT2|MAPK1|PIK3R2|NFKB1	http://www.genome.jp/kegg-bin/show_pathway?hsa04024/hsa:5595%09red/hsa:5594%09red/hsa:5293%09red/hsa:4792%09red/hsa:5296%09red/hsa:208%09red/hsa:4790%09red/hsa:207%09red
Gastric cancer	KEGG PATHWAY	hsa05226	7	149	1.15e-06	8.13e-06	E2F1|AKT1|PIK3CD|MAPK3|AKT2|MAPK1|PIK3R2	http://www.genome.jp/kegg-bin/show_pathway?hsa05226/hsa:5595%09red/hsa:5594%09red/hsa:5293%09red/hsa:5296%09red/hsa:208%09red/hsa:1869%09red/hsa:207%09red
GnRH signaling pathway	KEGG PATHWAY	hsa04912	6	93	1.2e-06	8.4e-06	MAP3K1|PRKCD|MAPK3|MAPK1|PRKACA|MAP2K4	http://www.genome.jp/kegg-bin/show_pathway?hsa04912/hsa:5578%09red/hsa:5595%09red/hsa:5594%09red/hsa:5580%09red/hsa:6416%09red/hsa:4214%09red
Inflammatory mediator regulation of TRP channels	KEGG PATHWAY	hsa04750	6	100	1.79e-06	1.21e-05	PIK3CD|PRKCD|PRKACA|PIK3R2|IL1RAP|IL1B	http://www.genome.jp/kegg-bin/show_pathway?hsa04750/hsa:5578%09red/hsa:3553%09red/hsa:5580%09red/hsa:3556%09red/hsa:5293%09red/hsa:5296%09red
Viral protein interaction with cytokine and cytokine receptor	KEGG PATHWAY	hsa04061	6	100	1.79e-06	1.21e-05	TNFSF10|TNFRSF1B|TNFRSF1A|TNFRSF10C|TNFRSF10B|TNFRSF10D	http://www.genome.jp/kegg-bin/show_pathway?hsa04061/hsa:8793%09red/hsa:7133%09red/hsa:7132%09red/hsa:8794%09red/hsa:8795%09red/hsa:8743%09red
Glucagon signaling pathway	KEGG PATHWAY	hsa04922	6	106	2.47e-06	1.62e-05	PPP3R1|PRKAG2|AKT1|AKT2|PPP3CA|PPP3CB	http://www.genome.jp/kegg-bin/show_pathway?hsa04922/hsa:5534%09red/hsa:5530%09red/hsa:5532%09red/hsa:51422%09red/hsa:208%09red/hsa:207%09red
Glutamatergic synapse	KEGG PATHWAY	hsa04724	6	114	3.69e-06	2.34e-05	PPP3R1|MAPK3|MAPK1|PRKACA|PPP3CA|PPP3CB	http://www.genome.jp/kegg-bin/show_pathway?hsa04724/hsa:5534%09red/hsa:5595%09red/hsa:5594%09red/hsa:5530%09red/hsa:5532%09red/hsa:5578%09red
Cell cycle	KEGG PATHWAY	hsa04110	6	124	5.86e-06	3.63e-05	YWHAZ|E2F1|ATM|YWHAB|TFDP2|TFDP1	http://www.genome.jp/kegg-bin/show_pathway?hsa04110/hsa:7534%09red/hsa:7529%09red/hsa:7027%09red/hsa:7029%09red/hsa:1869%09red/hsa:472%09red
Adrenergic signaling in cardiomyocytes	KEGG PATHWAY	hsa04261	6	149	1.6e-05	8.87e-05	AKT1|PIK3R5|MAPK3|AKT2|MAPK1|PRKACA	http://www.genome.jp/kegg-bin/show_pathway?hsa04261/hsa:5578%09red/hsa:5595%09red/hsa:5594%09red/hsa:208%09red/hsa:23533%09red/hsa:207%09red
Vasopressin-regulated water reabsorption	KEGG PATHWAY	hsa04962	4	44	2.22e-05	0.00011744	DYNLL1|DYNC1LI1|DYNC1LI2|DYNC1H1	http://www.genome.jp/kegg-bin/show_pathway?hsa04962/hsa:1783%09red/hsa:1778%09red/hsa:8655%09red/hsa:51143%09red
Carbohydrate digestion and absorption	KEGG PATHWAY	hsa04973	4	44	2.22e-05	0.00011744	AKT1|AKT2|PIK3CD|PIK3R2	http://www.genome.jp/kegg-bin/show_pathway?hsa04973/hsa:5293%09red/hsa:208%09red/hsa:207%09red/hsa:5296%09red
Phosphatidylinositol signaling system	KEGG PATHWAY	hsa04070	5	99	2.97e-05	0.000153168	MTMR3|MTMR14|PRKACA|PIK3R2|PIK3CD	http://www.genome.jp/kegg-bin/show_pathway?hsa04070/hsa:5578%09red/hsa:8897%09red/hsa:5293%09red/hsa:5296%09red/hsa:64419%09red
Regulation of lipolysis in adipocytes	KEGG PATHWAY	hsa04923	4	55	5.05e-05	0.00024959	AKT1|AKT2|PIK3CD|PIK3R2	http://www.genome.jp/kegg-bin/show_pathway?hsa04923/hsa:5293%09red/hsa:208%09red/hsa:207%09red/hsa:5296%09red
Long-term depression	KEGG PATHWAY	hsa04730	4	60	6.95e-05	0.000338411	MAPK3|IGF1R|MAPK1|PRKACA	http://www.genome.jp/kegg-bin/show_pathway?hsa04730/hsa:5578%09red/hsa:5595%09red/hsa:3480%09red/hsa:5594%09red
Inflammatory bowel disease (IBD)	KEGG PATHWAY	hsa05321	4	65	9.34e-05	0.000443837	NFKB1|IL1B|STAT3|TLR4	http://www.genome.jp/kegg-bin/show_pathway?hsa05321/hsa:7099%09red/hsa:6774%09red/hsa:3553%09red/hsa:4790%09red
Dopaminergic synapse	KEGG PATHWAY	hsa04728	5	131	0.000106624	0.000496589	AKT1|AKT2|PRKACA|PPP3CB|PPP3CA	http://www.genome.jp/kegg-bin/show_pathway?hsa04728/hsa:5578%09red/hsa:208%09red/hsa:207%09red/hsa:5530%09red/hsa:5532%09red
Amphetamine addiction	KEGG PATHWAY	hsa05031	4	68	0.000110233	0.000512094	PPP3CA|PPP3CB|PRKACA|PPP3R1	http://www.genome.jp/kegg-bin/show_pathway?hsa05031/hsa:5534%09red/hsa:5532%09red/hsa:5530%09red/hsa:5578%09red
Prion diseases	KEGG PATHWAY	hsa05020	3	35	0.000297892	0.00125374	MAPK3|IL1B|MAPK1	http://www.genome.jp/kegg-bin/show_pathway?hsa05020/hsa:3553%09red/hsa:5594%09red/hsa:5595%09red
Malaria	KEGG PATHWAY	hsa05144	3	49	0.000753734	0.00263951	IL1B|MYD88|TLR4	http://www.genome.jp/kegg-bin/show_pathway?hsa05144/hsa:7099%09red/hsa:3553%09red/hsa:4615%09red
Regulation of actin cytoskeleton	KEGG PATHWAY	hsa04810	5	214	0.000948834	0.00325441	MAPK3|MAPK1|PIK3CD|PIK3R2|GSN	http://www.genome.jp/kegg-bin/show_pathway?hsa04810/hsa:2934%09red/hsa:5595%09red/hsa:5293%09red/hsa:5594%09red/hsa:5296%09red
Vascular smooth muscle contraction	KEGG PATHWAY	hsa04270	4	132	0.00123529	0.00407692	MAPK3|MAPK1|PRKACA|PRKCD	http://www.genome.jp/kegg-bin/show_pathway?hsa04270/hsa:5578%09red/hsa:5595%09red/hsa:5594%09red/hsa:5580%09red
Ubiquitin mediated proteolysis	KEGG PATHWAY	hsa04120	4	137	0.00141095	0.00455826	XIAP|MAP3K1|BIRC3|BIRC2	http://www.genome.jp/kegg-bin/show_pathway?hsa04120/hsa:329%09red/hsa:331%09red/hsa:4214%09red/hsa:330%09red
Renin secretion	KEGG PATHWAY	hsa04924	3	69	0.00193577	0.0058616	PPP3CA|PPP3CB|PPP3R1	http://www.genome.jp/kegg-bin/show_pathway?hsa04924/hsa:5534%09red/hsa:5530%09red/hsa:5532%09red
Hippo signaling pathway	KEGG PATHWAY	hsa04390	4	154	0.00213809	0.00640031	YWHAB|YWHAZ|BIRC5|BIRC2	http://www.genome.jp/kegg-bin/show_pathway?hsa04390/hsa:332%09red/hsa:7529%09red/hsa:329%09red/hsa:7534%09red
Adherens junction	KEGG PATHWAY	hsa04520	3	72	0.0021755	0.0065017	MAPK3|IGF1R|MAPK1	http://www.genome.jp/kegg-bin/show_pathway?hsa04520/hsa:5595%09red/hsa:3480%09red/hsa:5594%09red
Inositol phosphate metabolism	KEGG PATHWAY	hsa00562	3	74	0.00234511	0.00696322	PIK3CD|MTMR14|MTMR3	http://www.genome.jp/kegg-bin/show_pathway?hsa00562/hsa:8897%09red/hsa:5293%09red/hsa:64419%09red
Wnt signaling pathway	KEGG PATHWAY	hsa04310	4	160	0.00244678	0.0072184	PPP3CA|PPP3CB|PRKACA|PPP3R1	http://www.genome.jp/kegg-bin/show_pathway?hsa04310/hsa:5534%09red/hsa:5532%09red/hsa:5530%09red/hsa:5578%09red
TGF-beta signaling pathway	KEGG PATHWAY	hsa04350	3	94	0.00449922	0.0122494	MAPK3|MAPK1|TFDP1	http://www.genome.jp/kegg-bin/show_pathway?hsa04350/hsa:5595%09red/hsa:5594%09red/hsa:7027%09red
Calcium signaling pathway	KEGG PATHWAY	hsa04020	4	193	0.00470454	0.0126211	PPP3CA|PPP3CB|PRKACA|PPP3R1	http://www.genome.jp/kegg-bin/show_pathway?hsa04020/hsa:5534%09red/hsa:5532%09red/hsa:5530%09red/hsa:5578%09red
Circadian entrainment	KEGG PATHWAY	hsa04713	3	97	0.00489806	0.0130639	MAPK3|MAPK1|PRKACA	http://www.genome.jp/kegg-bin/show_pathway?hsa04713/hsa:5578%09red/hsa:5595%09red/hsa:5594%09red
Melanogenesis	KEGG PATHWAY	hsa04916	3	101	0.00546208	0.0143801	MAPK3|MAPK1|PRKACA	http://www.genome.jp/kegg-bin/show_pathway?hsa04916/hsa:5578%09red/hsa:5595%09red/hsa:5594%09red
Parathyroid hormone synthesis, secretion and action	KEGG PATHWAY	hsa04928	3	106	0.00621987	0.0160077	MAPK3|MAPK1|PRKACA	http://www.genome.jp/kegg-bin/show_pathway?hsa04928/hsa:5578%09red/hsa:5595%09red/hsa:5594%09red
Leukocyte transendothelial migration	KEGG PATHWAY	hsa04670	3	112	0.00720819	0.0182694	PIK3CD|PRKACA|PIK3R2	http://www.genome.jp/kegg-bin/show_pathway?hsa04670/hsa:5578%09red/hsa:5293%09red/hsa:5296%09red
Serotonergic synapse	KEGG PATHWAY	hsa04726	3	115	0.00773521	0.0193908	MAPK3|MAPK1|PRKACA	http://www.genome.jp/kegg-bin/show_pathway?hsa04726/hsa:5578%09red/hsa:5595%09red/hsa:5594%09red
Thyroid cancer	KEGG PATHWAY	hsa05216	2	37	0.00784326	0.0195815	MAPK3|MAPK1	http://www.genome.jp/kegg-bin/show_pathway?hsa05216/hsa:5595%09red/hsa:5594%09red
Ferroptosis	KEGG PATHWAY	hsa04216	2	40	0.00905307	0.0222388	MAP1LC3B|ATG7	http://www.genome.jp/kegg-bin/show_pathway?hsa04216/hsa:81631%09red/hsa:10533%09red
Graft-versus-host disease	KEGG PATHWAY	hsa05332	2	41	0.00947369	0.0231481	FAS|IL1B	http://www.genome.jp/kegg-bin/show_pathway?hsa05332/hsa:3553%09red/hsa:355%09red
Type I diabetes mellitus	KEGG PATHWAY	hsa04940	2	43	0.0103406	0.0251324	FAS|IL1B	http://www.genome.jp/kegg-bin/show_pathway?hsa04940/hsa:3553%09red/hsa:355%09red
Endocytosis	KEGG PATHWAY	hsa04144	4	244	0.0104202	0.0252923	CHMP2B|CHMP7|IGF1R|VPS37C	http://www.genome.jp/kegg-bin/show_pathway?hsa04144/hsa:91782%09red/hsa:55048%09red/hsa:25978%09red/hsa:3480%09red
Retrograde endocannabinoid signaling	KEGG PATHWAY	hsa04723	3	148	0.0150354	0.0357384	MAPK3|MAPK1|PRKACA	http://www.genome.jp/kegg-bin/show_pathway?hsa04723/hsa:5578%09red/hsa:5595%09red/hsa:5594%09red
Cushing syndrome	KEGG PATHWAY	hsa04934	3	155	0.0169483	0.0396179	MAPK3|MAPK1|E2F1	http://www.genome.jp/kegg-bin/show_pathway?hsa04934/hsa:5595%09red/hsa:5594%09red/hsa:1869%09red
Viral myocarditis	KEGG PATHWAY	hsa05416	2	60	0.0190242	0.0436559	BID|CASP8	http://www.genome.jp/kegg-bin/show_pathway?hsa05416/hsa:637%09red/hsa:841%09red
Tight junction	KEGG PATHWAY	hsa04530	3	170	0.0214857	0.0462207	PRKAG2|TUBA1A|MAP3K1	http://www.genome.jp/kegg-bin/show_pathway?hsa04530/hsa:51422%09red/hsa:4214%09red/hsa:7846%09red

## Sheet: GO
#Term	Database	ID	Input number	Background number	P-Value	FDR	Input	Hyperlink
cytosol	Gene Ontology	GO:0005829	102	5095	7.9373e-62	1.45649e-58	BCL2L1|DYNLL1|PPP3R1|PSMF1|PRKAG2|IKBKB|AKT1|AKT2|IKBKG|PLIN3|GSN|MAP3K1|PIK3CD|CARD8|CAPN2|MTMR3|IRAK4|WIPI2|DFFB|PRF1|TNFRSF25|CHMP2B|MYD88|DBNL|TUBB4B|VIM|UBC|PAK2|NFKBIA|NFKBIE|PINK1|CRADD|UBAP1|WDR45|TUBA1A|PIK3R5|AKT1S1|PIK3R2|MAP1LC3B|CHUK|ATG14|DYNC1LI1|DYNC1LI2|NLRP1|IRF2|IRF1|IRF4|PSMD12|PLEC|TFDP1|PSMB10|XIAP|IL1B|CHMP7|TSC1|STAT3|CFLAR|TRADD|MAPK3|MAPK1|NFKB1|RPS27A|BNIP3L|BIRC3|PRKAR…	http://amigo.geneontology.org/amigo/term/GO:0005829
protein binding	Gene Ontology	GO:0005515	126	11779	2.68839e-55	2.4666e-52	BCL2L1|ELANE|DYNLL1|PPP3R1|PSMF1|CHMP2B|AKT1|AKT2|BOK|IKBKG|PLIN3|GSN|MAP3K1|PIK3CD|CARD8|CAPN2|MTMR3|IRAK4|IGF1R|WIPI2|DFFB|OPA1|IKBKB|MYD88|DBNL|TUBB4B|VIM|TLR4|UBC|PAK2|CSF2RB|TNFSF10|NFKBIA|NFKBIE|PINK1|CRADD|UBAP1|WDR45|TUBA1A|RRAGB|VPS37C|AKT1S1|PIK3R2|ATG9A|MAP1LC3B|FUNDC1|TUBB6|CHUK|ATG14|DYNC1LI1|NLRP1|IRF2|IRF1|TNFRSF1B|IRF4|PSMD12|CD14|LAMTOR4|PLEC|TFDP2|TFDP1|PSMB10|ATM|TNFRSF10C|TNFR…	http://amigo.geneontology.org/amigo/term/GO:0005515
cytoplasm	Gene Ontology	GO:0005737	81	4624	1.142e-40	4.80818e-38	BCL2L1|DBNL|ELANE|DYNLL1|PSMB10|BIRC5|NFKBIA|CHP1|BIRC2|IRAK4|NFKBIE|IKBKB|AKT1|XIAP|BOK|IKBKG|PINK1|PSMD9|PRKX|CFLAR|CRADD|GSN|YWHAZ|UBAP1|STAT3|GABARAPL2|TUBA1A|UBC|PIK3CD|TRADD|PLIN3|TSC1|MAPK3|PIK3R5|MAPK1|ATG7|YWHAB|NFKB1|MYD88|MTMR3|DAPK2|DAPK1|CAPN2|TRAF1|RPS27A|PSMB9|RRAGC|RRAGB|TUBB6|BIRC3|PRF1|KPNB1|PRKCD|AKT1S1|TUBB1|PRKAG2|CHUK|PLEC|PRKAR1A|TNFRSF25|UBE2V1|VIM|PPP3CB|CHMP2B|IRF1|CASP5…	http://amigo.geneontology.org/amigo/term/GO:0005737
apoptotic process	Gene Ontology	GO:0006915	40	546	1.31013e-40	4.80818e-38	TNFRSF10D|TNFSF10|DYNLL1|BIRC5|NFKBIA|BIRC3|BIRC2|RIPK1|TNFRSF10B|BOK|IKBKG|MAP2K4|IL1B|BCL2L11|CFLAR|FAS|TRADD|MAPK3|MAPK1|NFKB1|MYD88|DAPK2|DAPK1|TRAF1|TRAF3|RRAGC|CASP4|PRKCD|TNFRSF25|ATG4D|NLRP1|BCAP31|IRF1|CASP5|CASP2|CARD8|CASP1|CASP8|CD14|PAK2	http://amigo.geneontology.org/amigo/term/GO:0006915
interleukin-1-mediated signaling pathway	Gene Ontology	GO:0070498	21	94	1.15407e-30	1.51265e-28	NFKBIA|PSMD9|UBC|PSMB10|PSME4|PSMB8|CHUK|PSMD12|IKBKB|MAPK3|NFKB1|RPS27A|IKBKG|PSMB9|IL1RAP|UBE2V1|IL1B|MYD88|PSMB3|PSMF1|IRAK4	http://amigo.geneontology.org/amigo/term/GO:0070498
tumor necrosis factor-mediated signaling pathway	Gene Ontology	GO:0033209	22	121	2.48089e-30	2.84527e-28	PSMD9|PSMB10|PSMF1|NFKBIA|BIRC3|BIRC2|RIPK1|FAS|TRADD|TRAF1|TRAF3|PSME4|CHUK|TNFRSF25|IKBKB|TNFRSF1B|TNFRSF1A|PSMD12|MAP3K14|PSMB9|PSMB8|PSMB3	http://amigo.geneontology.org/amigo/term/GO:0033209
cellular response to mechanical stimulus	Gene Ontology	GO:0071260	18	79	1.53177e-26	1.22209e-24	IRF1|CASP5|CASP2|AKT1|FAS|MAP3K1|TNFRSF10B|NFKB1|CASP8|MAPK3|MAP3K14|TLR4|MAP2K4|CASP1|IL1B|MYD88|CRADD|TNFRSF1A	http://amigo.geneontology.org/amigo/term/GO:0071260
positive regulation of I-kappaB kinase/NF-kappaB signaling	Gene Ontology	GO:0043123	21	185	4.5368e-25	2.8707e-23	RIPK1|TNFSF10|TNFRSF25|CASP1|TNFRSF1A|BIRC3|BIRC2|TRADD|CHUK|IKBKB|TNFRSF10B|CASP8|MAP3K14|IKBKG|TLR4|PINK1|UBE2V1|IL1B|MYD88|CFLAR|IRAK4	http://amigo.geneontology.org/amigo/term/GO:0043123
regulation of apoptotic process	Gene Ontology	GO:0042981	21	197	1.53052e-24	9.36165e-23	DAPK2|TRAF3|CASP2|TNFRSF10B|BNIP3L|FAS|BID|ATM|BIRC3|BIRC2|CRADD|TNFRSF10C|AKT1|AKT1S1|TNFRSF25|TNFRSF10D|PINK1|CASP1|BCL2L11|BIRC5|DAPK1	http://amigo.geneontology.org/amigo/term/GO:0042981
nucleus	Gene Ontology	GO:0005634	67	5208	2.85496e-24	1.68995e-22	DYNLL1|PSMB10|BIRC5|NFKBIA|CHP1|BIRC2|IRAK4|IKBKB|AKT1|AKT2|BOK|RPS27A|IKBKG|MAP2K4|PINK1|PSMD9|PRKX|CRADD|GSN|YWHAZ|STAT3|TUBA1A|UBC|TRADD|TSC1|MAPK3|PIK3R5|MAPK1|PIK3R2|YWHAB|NFKB1|MYD88|DAPK2|DAPK1|CAPN2|NLRP1|ATM|BNIP3L|RRAGC|RRAGB|TUBB6|BIRC3|PSME4|KPNB1|PRKCD|DFFB|PRKAG2|PRF1|SATB1|OPA1|UBE2V1|IRF2|IRF1|TNFRSF1B|CARD8|E2F1|IRF4|TUBB4B|XIAP|CASP2|PAK2|PSMB9|PSMB8|PSMB3|TFDP2|TFDP1|MCL1	http://amigo.geneontology.org/amigo/term/GO:0005634
Fc-epsilon receptor signaling pathway	Gene Ontology	GO:0038095	20	171	3.73799e-24	2.07855e-22	MAP3K1|PSMD9|PPP3R1|PSMB10|NFKB1|PSME4|MAP2K4|CHUK|PSMD12|IKBKB|MAPK3|MAPK1|PIK3R2|PSMB9|PSMB8|PPP3CA|PPP3CB|PSMB3|PSMF1|IKBKG	http://amigo.geneontology.org/amigo/term/GO:0038095
nucleoplasm	Gene Ontology	GO:0005654	56	3630	2.52121e-23	1.32184e-21	PSMD9|PPP3R1|PSMB10|BIRC5|NFKBIA|BIRC3|NFKBIE|AKT1|AKT2|RPS27A|IKBKG|NLRP1|PRKX|CHMP7|ATG4D|YWHAZ|STAT3|UBC|MAPK3|MAPK1|AKT1S1|MAP3K14|PSMF1|ATM|RRAGC|SCAF11|WIPI2|PSME4|KPNB1|PRKCD|DFFB|CHUK|PRKAG2|PRF1|SATB1|OPA1|UBE2V1|IRF2|IRF1|CARD8|E2F1|IRF4|NFKB1|XIAP|CASP8|PSMD12|PRKACA|PAK2|PSMB9|PSMB8|PPP3CA|PPP3CB|PSMB3|TFDP2|TFDP1|MCL1	http://amigo.geneontology.org/amigo/term/GO:0005654
I-kappaB kinase/NF-kappaB signaling	Gene Ontology	GO:0007249	15	65	2.33013e-22	1.15562e-20	RIPK1|RPS27A|TNFRSF1A|NFKBIA|BIRC3|BIRC2|TRADD|CHUK|IKBKB|AKT1|CD14|MAP3K14|IKBKG|TLR4|UBC	http://amigo.geneontology.org/amigo/term/GO:0007249
positive regulation of apoptotic process	Gene Ontology	GO:0043065	22	335	2.15907e-21	9.66316e-20	TNFSF10|ATM|RIPK1|TNFRSF10B|BOK|CRADD|BCL2L11|FAS|BID|TRADD|ATG7|DAPK2|DAPK1|RPS27A|BNIP3L|TNFRSF25|TNFRSF10C|CASP2|E2F1|AKT1|CASP8|UBC	http://amigo.geneontology.org/amigo/term/GO:0043065
regulation of mRNA stability	Gene Ontology	GO:0043488	16	111	7.61856e-21	3.17728e-19	YWHAZ|RPS27A|PSMD9|PSMB10|PSME4|UBC|PRKCD|PSMD12|AKT1|PRKACA|PSMB9|PSMB8|YWHAB|VIM|PSMB3|PSMF1	http://amigo.geneontology.org/amigo/term/GO:0043488
TRIF-dependent toll-like receptor signaling pathway	Gene Ontology	GO:0035666	12	29	1.05708e-20	4.21684e-19	RIPK1|TRAF3|RPS27A|BIRC3|BIRC2|CASP8|CHUK|IKBKB|CD14|IKBKG|TLR4|UBC	http://amigo.geneontology.org/amigo/term/GO:0035666
negative regulation of apoptotic process	Gene Ontology	GO:0043066	24	487	1.6429e-20	6.41431e-19	BCL2L1|BIRC5|RPS27A|BIRC3|BIRC2|IKBKB|AKT1|XIAP|MCL1|TNFRSF10D|YWHAZ|FAS|BID|CFLAR|NFKB1|MYD88|DAPK1|IGF1R|NFKBIA|BNIP3L|RIPK1|CASP2|AKT2|UBC	http://amigo.geneontology.org/amigo/term/GO:0043066
identical protein binding	Gene Ontology	GO:0042802	35	1456	6.45664e-20	2.46832e-18	BCL2L1|TNFSF10|BIRC5|ATM|BIRC2|IKBKB|AKT1|XIAP|TRAF3|IKBKG|YWHAZ|STAT3|FAS|TUBA1A|TRADD|MAPK3|MAPK1|YWHAB|NFKB1|MYD88|DAPK2|DAPK1|TRAF1|IGF1R|NFKBIA|BNIP3L|DFFB|DYNC1LI2|RIPK1|CASP2|CASP1|CASP8|VIM|MFN1|TLR4	http://amigo.geneontology.org/amigo/term/GO:0042802
viral process	Gene Ontology	GO:0016032	23	456	6.74465e-20	2.5258e-18	DYNLL1|PSMB10|NFKBIA|RIPK1|IKBKG|STAT3|CFLAR|MAPK3|MAPK1|YWHAB|BNIP3L|DYNC1LI1|SATB1|NLRP1|BCAP31|IKBKB|E2F1|TNFRSF1A|VIM|PSMB9|PSMB8|PSMB3|PAK2	http://amigo.geneontology.org/amigo/term/GO:0016032
NIK/NF-kappaB signaling	Gene Ontology	GO:0038061	13	62	4.77891e-19	1.6864e-17	PSMD9|PSMB10|PSME4|BIRC3|BIRC2|CHUK|AKT1|MAP3K14|PSMB9|PSMB8|PSMD12|PSMB3|PSMF1	http://amigo.geneontology.org/amigo/term/GO:0038061
apoptotic signaling pathway	Gene Ontology	GO:0097190	13	64	6.89649e-19	2.38775e-17	CASP5|CASP2|TNFRSF25|CASP1|FAS|CASP8|RIPK1|CFLAR|CD14|PRKACA|TLR4|CRADD|DAPK1	http://amigo.geneontology.org/amigo/term/GO:0097190
protein domain specific binding	Gene Ontology	GO:0019904	18	239	1.18326e-18	3.87728e-17	YWHAZ|CASP2|PPP3R1|TUBA1A|KPNB1|IKBKG|DFFB|VIM|CHMP2B|NLRP1|LAMP2|OPA1|YWHAB|DBNL|IL1B|TFDP2|TFDP1|PRKAR1A	http://amigo.geneontology.org/amigo/term/GO:0019904
macroautophagy	Gene Ontology	GO:0016236	14	93	1.29251e-18	4.16096e-17	FUNDC1|DYNLL1|GABARAPL2|WIPI2|PRKAG2|VPS37C|CHMP2B|MFN1|MTMR14|ATG14|ATG7|PINK1|MAP1LC3B|MTMR3	http://amigo.geneontology.org/amigo/term/GO:0016236
positive regulation of NF-kappaB transcription factor activity	Gene Ontology	GO:0051092	16	159	1.4851e-18	4.69855e-17	TRAF1|RIPK1|RPS27A|STAT3|UBC|CHUK|TRADD|IKBKB|CFLAR|NFKB1|IKBKG|TLR4|IL1RAP|UBE2V1|IL1B|MYD88	http://amigo.geneontology.org/amigo/term/GO:0051092
MyD88-independent toll-like receptor signaling pathway	Gene Ontology	GO:0002756	10	19	2.80291e-18	8.57222e-17	RIPK1|RPS27A|BIRC3|BIRC2|CHUK|IKBKB|CD14|IKBKG|TLR4|UBC	http://amigo.geneontology.org/amigo/term/GO:0002756
cytokine-mediated signaling pathway	Gene Ontology	GO:0019221	18	282	1.85666e-17	5.24149e-16	BCL2L1|YWHAZ|RPS27A|TNFRSF1B|IRF4|BIRC5|UBC|PIK3CD|VIM|AKT1|CSF2RB|MCL1|IL1RAP|STAT3|IL1B|CASP1|IRAK4|TNFRSF1A	http://amigo.geneontology.org/amigo/term/GO:0019221
mitochondrion	Gene Ontology	GO:0005739	30	1258	5.51057e-17	1.50924e-15	BCL2L1|DYNLL1|PPP3R1|RIPK1|AKT1|BOK|MCL1|PINK1|YWHAZ|BCL2L11|BID|MAPK3|MAPK1|YWHAB|NFKB1|MAP1LC3B|TRAF3|BNIP3L|ATG4D|BCAP31|CASP4|CASP2|E2F1|TNFRSF1A|CASP8|MFN1|PRKACA|PPP3CA|TFDP2|TFDP1	http://amigo.geneontology.org/amigo/term/GO:0005739
regulation of tumor necrosis factor-mediated signaling pathway	Gene Ontology	GO:0010803	10	29	8.64484e-17	2.33284e-15	TRAF1|RIPK1|TNFRSF1A|BIRC3|BIRC2|TRADD|CHUK|IKBKB|IKBKG|CASP8	http://amigo.geneontology.org/amigo/term/GO:0010803
T cell receptor signaling pathway	Gene Ontology	GO:0050852	15	174	1.56193e-16	4.09448e-15	PSMD9|PSMB10|PSME4|PIK3CD|CHUK|PSMD12|IKBKB|MAPK1|PIK3R2|PSMB9|PSMB8|NFKB1|PSMB3|PSMF1|IKBKG	http://amigo.geneontology.org/amigo/term/GO:0050852
stimulatory C-type lectin receptor signaling pathway	Gene Ontology	GO:0002223	13	112	5.00975e-16	1.27679e-14	PSMD9|PSMB10|PSME4|PRKCD|CHUK|IKBKB|IKBKG|PSMB9|PSMB8|NFKB1|PSMD12|PSMB3|PSMF1	http://amigo.geneontology.org/amigo/term/GO:0002223
protein deubiquitination	Gene Ontology	GO:0016579	16	262	2.38266e-15	5.67816e-14	NFKBIA|PSMD9|PSMB10|PSME4|UBC|BIRC3|BIRC2|PSMD12|RIPK1|TRAF3|RPS27A|IKBKG|PSMB9|PSMB8|PSMB3|PSMF1	http://amigo.geneontology.org/amigo/term/GO:0016579
antigen processing and presentation of exogenous peptide antigen via MHC class I, TAP-dependent	Gene Ontology	GO:0002479	11	75	9.18264e-15	2.16027e-13	PSMD9|PSMB10|PSME4|CHUK|PSMD12|IKBKB|IKBKG|PSMB9|PSMB8|PSMB3|PSMF1	http://amigo.geneontology.org/amigo/term/GO:0002479
protein-containing complex binding	Gene Ontology	GO:0044877	17	349	1.04695e-14	2.43185e-13	BCAP31|CASP8|CFLAR|ATM|BIRC3|BIRC2|TRADD|CHUK|RIPK1|PINK1|BOK|CAPN2|PPP3CA|YWHAB|UBE2V1|TSC1|IKBKG	http://amigo.geneontology.org/amigo/term/GO:0044877
membrane raft	Gene Ontology	GO:0045121	15	237	1.12993e-14	2.59178e-13	RIPK1|TNFRSF1B|TNFRSF1A|FAS|TUBA1A|BIRC3|BIRC2|TRADD|IKBKB|CFLAR|CD14|CASP8|CAPN2|DYNLL1|LAMP2	http://amigo.geneontology.org/amigo/term/GO:0045121
ubiquitin protein ligase binding	Gene Ontology	GO:0031625	16	294	1.3025e-14	2.91474e-13	YWHAZ|TRAF1|TRAF3|TNFRSF1B|GABARAPL2|BID|NFKBIA|CASP8|RIPK1|BOK|RPS27A|PRKAR1A|UBC|PINK1|MAP1LC3B|IKBKG	http://amigo.geneontology.org/amigo/term/GO:0031625
protein serine/threonine kinase activity	Gene Ontology	GO:0004674	17	357	1.49041e-14	3.29506e-13	RIPK1|ATM|MAP3K1|PRKCD|IRAK4|CHUK|IKBKB|AKT1|AKT2|MAPK1|PRKACA|PAK2|MAP2K4|PINK1|MAP3K14|DAPK2|DAPK1	http://amigo.geneontology.org/amigo/term/GO:0004674
positive regulation of transcription by RNA polymerase II	Gene Ontology	GO:0045944	26	1159	3.52665e-14	7.52489e-13	PPP3R1|NFKBIA|RIPK1|AKT1|RPS27A|IKBKG|IL1B|STAT3|MAPK3|PIK3R2|IKBKB|NFKB1|ATM|CHUK|OPA1|IRF2|IRF1|E2F1|IRF4|TNFRSF1A|TLR4|UBC|PPP3CA|PPP3CB|TFDP2|TFDP1	http://amigo.geneontology.org/amigo/term/GO:0045944
inflammatory response	Gene Ontology	GO:0006954	17	381	4.10054e-14	8.64885e-13	RIPK1|CASP4|TNFRSF1B|TNFRSF1A|NLRP1|PIK3CD|CHUK|IKBKB|AKT1|CD14|NFKB1|IKBKG|TLR4|IL1RAP|STAT3|IL1B|MYD88	http://amigo.geneontology.org/amigo/term/GO:0006954
MAPK cascade	Gene Ontology	GO:0000165	15	261	4.28888e-14	8.84281e-13	CSF2RB|PSMD9|PSMB10|PSME4|MAP3K1|PSMD12|MAPK3|MAPK1|MAP3K14|PSMB9|PSMB8|YWHAB|IL1B|PSMB3|PSMF1	http://amigo.geneontology.org/amigo/term/GO:0000165
protein phosphorylation	Gene Ontology	GO:0006468	18	451	4.34211e-14	8.85309e-13	YWHAZ|ATM|AKT1|BIRC5|MAP3K1|PIK3CD|PRKCD|CHUK|IKBKB|MAPK3|MAPK1|PRKACA|PAK2|PINK1|PRKAG2|PPP3CB|DAPK2|DAPK1	http://amigo.geneontology.org/amigo/term/GO:0006468
signal transduction	Gene Ontology	GO:0007165	24	1013	1.23303e-13	2.40704e-12	CSF2RB|TNFSF10|DYNLL1|ATM|AKT1|AKT2|TNFRSF10D|IL1B|PRKX|YWHAZ|STAT3|FAS|PIK3CD|TRADD|MAPK1|MYD88|IGF1R|TRAF3|PRKCD|TNFRSF25|CASP1|MAP2K4|PPP3CB|PAK2	http://amigo.geneontology.org/amigo/term/GO:0007165
intrinsic apoptotic signaling pathway in response to DNA damage	Gene Ontology	GO:0008630	9	43	1.51404e-13	2.92449e-12	BCL2L1|CASP2|E2F1|TNFRSF1A|ATM|BOK|MCL1|TNFRSF1B|BCL2L11	http://amigo.geneontology.org/amigo/term/GO:0008630
regulation of transcription from RNA polymerase II promoter in response to hypoxia	Gene Ontology	GO:0061418	10	70	1.99057e-13	3.72723e-12	RPS27A|PSMD9|PSMB10|PSME4|PSMB8|PSMD12|PSMB9|UBC|PSMB3|PSMF1	http://amigo.geneontology.org/amigo/term/GO:0061418
positive regulation of protein insertion into mitochondrial membrane involved in apoptotic signaling pathway	Gene Ontology	GO:1900740	8	26	2.45183e-13	4.4991e-12	YWHAZ|E2F1|PPP3R1|BID|CASP8|YWHAB|TFDP2|TFDP1	http://amigo.geneontology.org/amigo/term/GO:1900740
stress-activated MAPK cascade	Gene Ontology	GO:0051403	8	26	2.45183e-13	4.4991e-12	RPS27A|CHUK|IKBKB|MAPK3|MAPK1|IKBKG|UBC|NFKB1	http://amigo.geneontology.org/amigo/term/GO:0051403
membrane	Gene Ontology	GO:0016020	32	2075	6.11816e-13	1.0795e-11	DYNLL1|DYNC1LI2|PRKAR1A|PSMF1|RPS27A|MCL1|PINK1|PLIN3|TSC1|BID|PIK3CD|PIK3R5|YWHAB|ATG9A|OPA1|MTMR3|IGF1R|WIPI2|KPNB1|PLEC|DYNC1LI1|DYNC1H1|IL1RAP|CASP2|BCAP31|TNFRSF1B|IRF4|ENDOD1|TNFRSF1A|PSMD12|UBC|LAMP2	http://amigo.geneontology.org/amigo/term/GO:0016020
protein-containing complex	Gene Ontology	GO:0032991	19	623	8.14093e-13	1.42272e-11	CASP4|CARD8|E2F1|AKT1|WIPI2|CASP1|BIRC3|DFFB|RIPK1|MAPK3|AKT2|CASP8|MAPK1|PRKAR1A|IKBKG|UBE2V1|TSC1|PAK2|GSN	http://amigo.geneontology.org/amigo/term/GO:0032991
anaphase-promoting complex-dependent catabolic process	Gene Ontology	GO:0031145	10	82	8.42266e-13	1.45807e-11	RPS27A|PSMD9|PSMB10|PSME4|PSMB8|PSMD12|PSMB9|UBC|PSMB3|PSMF1	http://amigo.geneontology.org/amigo/term/GO:0031145
peptidyl-serine phosphorylation	Gene Ontology	GO:0018105	12	161	9.31028e-13	1.59667e-11	AKT1|ATM|PRKCD|CHUK|IKBKB|MAPK3|AKT2|MAPK1|PRKACA|PINK1|PRKX|PAK2	http://amigo.geneontology.org/amigo/term/GO:0018105
protein kinase activity	Gene Ontology	GO:0004672	13	216	1.31337e-12	2.19093e-11	RIPK1|MAP3K1|PRKCD|IRAK4|CHUK|IKBKB|AKT1|PRKACA|PAK2|MAP2K4|PINK1|MAP3K14|DAPK1	http://amigo.geneontology.org/amigo/term/GO:0004672
mitochondrial outer membrane	Gene Ontology	GO:0005741	12	166	1.30644e-12	2.19093e-11	BCL2L1|FUNDC1|BCL2L11|BID|RPS27A|CASP8|MFN1|BOK|MCL1|UBC|PINK1|BNIP3L	http://amigo.geneontology.org/amigo/term/GO:0005741
regulation of extrinsic apoptotic signaling pathway via death domain receptors	Gene Ontology	GO:1902041	7	17	1.48711e-12	2.45842e-11	TNFSF10|CFLAR|FAS|CASP8|RIPK1|TNFRSF10B|TRADD	http://amigo.geneontology.org/amigo/term/GO:1902041
negative regulation of extrinsic apoptotic signaling pathway via death domain receptors	Gene Ontology	GO:1902042	8	38	3.40528e-12	5.48131e-11	BCL2L1|TNFSF10|CFLAR|FAS|TRADD|RIPK1|TNFRSF10B|CASP8	http://amigo.geneontology.org/amigo/term/GO:1902042
autophagy of mitochondrion	Gene Ontology	GO:0000422	8	38	3.40528e-12	5.48131e-11	FUNDC1|WDR45|GABARAPL2|WIPI2|ATG7|PINK1|ATG9A|MAP1LC3B	http://amigo.geneontology.org/amigo/term/GO:0000422
extracellular exosome	Gene Ontology	GO:0070062	31	2085	3.82837e-12	6.10874e-11	ELANE|TNFSF10|RPS27A|CHP1|CHMP2B|TUBB4B|VIM|GSN|YWHAZ|FAS|TUBA1A|VPS37C|PSMB8|CAPN2|YWHAB|TUBB6|KPNB1|PRKCD|TUBB1|PLEC|LAMP2|DYNC1H1|UBE2V1|DBNL|ENDOD1|PSMD12|CD14|PRKACA|PSMB9|UBC|PSMB3	http://amigo.geneontology.org/amigo/term/GO:0070062
ATP binding	Gene Ontology	GO:0005524	26	1463	6.18976e-12	9.6256e-11	ATM|RIPK1|AKT1|AKT2|MAP2K4|PINK1|PRKX|NLRP1|MAP3K1|PIK3CD|MAPK3|MAPK1|MAP3K14|DAPK2|DAPK1|IGF1R|PRKAG2|PRKCD|CHUK|DYNC1LI1|DYNC1LI2|DYNC1H1|IKBKB|PRKACA|IRAK4|PAK2	http://amigo.geneontology.org/amigo/term/GO:0005524
cysteine-type endopeptidase activity involved in apoptotic signaling pathway	Gene Ontology	GO:0097199	6	10	1.0799e-11	1.63771e-10	CASP4|CASP5|CASP2|CASP1|CASP8|CFLAR	http://amigo.geneontology.org/amigo/term/GO:0097199
neutrophil degranulation	Gene Ontology	GO:0043312	16	482	1.74579e-11	2.6045e-10	DBNL|ELANE|TNFRSF1B|TUBB4B|NFKB1|ATG7|KPNB1|PRKCD|PSMD12|CD14|MAPK1|DYNC1LI1|LAMP2|DYNC1H1|DYNLL1|GSN	http://amigo.geneontology.org/amigo/term/GO:0043312
execution phase of apoptosis	Gene Ontology	GO:0097194	7	26	1.78949e-11	2.64816e-10	CASP4|CASP5|CASP2|CASP1|CASP8|AKT1|CFLAR	http://amigo.geneontology.org/amigo/term/GO:0097194
regulation of cellular amino acid metabolic process	Gene Ontology	GO:0006521	8	51	2.78874e-11	4.06137e-10	PSMD9|PSMB10|PSME4|PSMD12|PSMB9|PSMB8|PSMB3|PSMF1	http://amigo.geneontology.org/amigo/term/GO:0006521
plasma membrane	Gene Ontology	GO:0005886	45	4619	3.3415e-11	4.82807e-10	CSF2RB|DYNLL1|NFKBIA|CHP1|CHMP2B|TNFRSF10B|AKT2|TNFRSF10D|GSN|UBAP1|STAT3|FAS|PIK3CD|TRADD|TSC1|MAPK3|PIK3R5|MAPK1|CAPN2|MYD88|DAPK1|IGF1R|RPS27A|PRKCD|PLEC|DYNC1LI1|TNFRSF25|IL1RAP|DBNL|TNFRSF10C|CASP4|TNFRSF1A|TNFRSF1B|AKT1|CASP1|VIM|CD14|PRKACA|IRAK4|TLR4|UBC|PPP3CA|PPP3CB|PAK2|LAMP2	http://amigo.geneontology.org/amigo/term/GO:0005886
enzyme binding	Gene Ontology	GO:0019899	14	353	3.62924e-11	5.16252e-10	NFKBIA|CASP2|BIRC5|KPNB1|PRKCD|DFFB|AKT1|PRKACA|CAPN2|NLRP1|YWHAB|PPP3CA|PPP3CB|LAMP2	http://amigo.geneontology.org/amigo/term/GO:0019899
cysteine-type endopeptidase activity involved in execution phase of apoptosis	Gene Ontology	GO:0097200	6	13	3.62835e-11	5.16252e-10	CASP4|CASP5|CASP2|CASP1|CASP8|CFLAR	http://amigo.geneontology.org/amigo/term/GO:0097200
negative regulation of necroptotic process	Gene Ontology	GO:0060546	6	14	5.16892e-11	7.07833e-10	BIRC3|BIRC2|CASP8|RIPK1|CFLAR|BOK	http://amigo.geneontology.org/amigo/term/GO:0060546
cysteine-type endopeptidase activity involved in apoptotic process	Gene Ontology	GO:0097153	6	14	5.16892e-11	7.07833e-10	CASP4|CASP5|CASP2|CASP1|CASP8|CFLAR	http://amigo.geneontology.org/amigo/term/GO:0097153
MyD88-dependent toll-like receptor signaling pathway	Gene Ontology	GO:0002755	7	31	5.21229e-11	7.08485e-10	RPS27A|MAP3K1|CD14|TLR4|UBC|MYD88|IRAK4	http://amigo.geneontology.org/amigo/term/GO:0002755
Wnt signaling pathway, planar cell polarity pathway	Gene Ontology	GO:0060071	9	89	5.67762e-11	7.60469e-10	PSMD9|PSMB10|PSME4|PSMB8|PSMD12|PSMB9|OPA1|PSMB3|PSMF1	http://amigo.geneontology.org/amigo/term/GO:0060071
negative regulation of G2/M transition of mitotic cell cycle	Gene Ontology	GO:0010972	8	57	6.24018e-11	8.23794e-10	PSMD9|PSMB10|PSME4|PSMD12|PSMB9|PSMB8|PSMB3|PSMF1	http://amigo.geneontology.org/amigo/term/GO:0010972
extrinsic apoptotic signaling pathway via death domain receptors	Gene Ontology	GO:0008625	7	33	7.65659e-11	9.96443e-10	TNFRSF1A|BID|TRADD|TNFRSF10B|CASP8|CRADD|DAPK1	http://amigo.geneontology.org/amigo/term/GO:0008625
extrinsic apoptotic signaling pathway in absence of ligand	Gene Ontology	GO:0097192	7	33	7.65659e-11	9.96443e-10	BCL2L1|CASP2|FAS|BOK|MCL1|BCL2L11|IL1B	http://amigo.geneontology.org/amigo/term/GO:0097192
lipopolysaccharide-mediated signaling pathway	Gene Ontology	GO:0031663	7	34	9.20691e-11	1.18145e-09	AKT1|NFKBIA|MAPK3|CD14|MAPK1|TLR4|IL1B	http://amigo.geneontology.org/amigo/term/GO:0031663
positive regulation of canonical Wnt signaling pathway	Gene Ontology	GO:0090263	10	145	1.59897e-10	2.00966e-09	PSMD9|PSMB10|PSME4|PSMD12|XIAP|PSMB9|PSMB8|NFKB1|PSMB3|PSMF1	http://amigo.geneontology.org/amigo/term/GO:0090263
protein polyubiquitination	Gene Ontology	GO:0000209	12	267	2.47128e-10	3.00317e-09	RPS27A|PSMD9|PSMB10|PSME4|UBC|BIRC2|PSMD12|PSMB9|PSMB8|UBE2V1|PSMB3|PSMF1	http://amigo.geneontology.org/amigo/term/GO:0000209
regulation of hematopoietic stem cell differentiation	Gene Ontology	GO:1902036	8	69	2.51412e-10	3.03513e-09	PSMD9|PSMB10|PSME4|PSMD12|PSMB9|PSMB8|PSMB3|PSMF1	http://amigo.geneontology.org/amigo/term/GO:1902036
regulation of autophagy	Gene Ontology	GO:0010506	8	70	2.79348e-10	3.35035e-09	RRAGC|RRAGB|ATM|BOK|PIK3R2|MTMR3|DAPK2|DAPK1	http://amigo.geneontology.org/amigo/term/GO:0010506
death-inducing signaling complex	Gene Ontology	GO:0031264	5	7	3.28853e-10	3.91848e-09	RIPK1|FAS|CASP8|TRADD|CFLAR	http://amigo.geneontology.org/amigo/term/GO:0031264
cellular response to starvation	Gene Ontology	GO:0009267	8	72	3.434e-10	4.03935e-09	WDR45|RRAGC|RRAGB|WIPI2|ATG14|ATG7|MAP1LC3B|LAMP2	http://amigo.geneontology.org/amigo/term/GO:0009267
regulation of mitotic cell cycle phase transition	Gene Ontology	GO:1901990	8	80	7.44313e-10	8.53634e-09	PSMD9|PSMB10|PSME4|PSMD12|PSMB9|PSMB8|PSMB3|PSMF1	http://amigo.geneontology.org/amigo/term/GO:1901990
intracellular signal transduction	Gene Ontology	GO:0035556	13	369	7.55095e-10	8.60621e-09	AKT1|PRKAG2|PRKCD|IRAK4|MAPK3|AKT2|MAPK1|PRKACA|PAK2|PINK1|DAPK2|DAPK1|PRKAR1A	http://amigo.geneontology.org/amigo/term/GO:0035556
activation of MAPK activity	Gene Ontology	GO:0000187	9	123	8.30538e-10	9.40764e-09	RPS27A|MAP2K4|MAPK3|MAPK1|IKBKG|TLR4|UBC|UBE2V1|IL1B	http://amigo.geneontology.org/amigo/term/GO:0000187
regulation of inflammatory response	Gene Ontology	GO:0050727	8	82	8.92519e-10	1.00477e-08	CASP4|CASP5|NLRP1|CASP1|BIRC3|BIRC2|XIAP|MYD88	http://amigo.geneontology.org/amigo/term/GO:0050727
positive regulation of cysteine-type endopeptidase activity involved in apoptotic process	Gene Ontology	GO:0043280	7	54	1.68854e-09	1.85537e-08	BCAP31|TNFSF10|BCL2L11|CASP1|CARD8|NLRP1|DAPK1	http://amigo.geneontology.org/amigo/term/GO:0043280
positive regulation of interleukin-8 production	Gene Ontology	GO:0032757	7	54	1.68854e-09	1.85537e-08	ELANE|STAT3|RIPK1|CD14|TLR4|IL1B|MYD88	http://amigo.geneontology.org/amigo/term/GO:0032757
viral life cycle	Gene Ontology	GO:0019058	6	28	1.72486e-09	1.884e-08	UBAP1|RPS27A|VPS37C|CHMP2B|UBC|CHMP7	http://amigo.geneontology.org/amigo/term/GO:0019058
anoikis	Gene Ontology	GO:0043276	5	11	1.79396e-09	1.94788e-08	AKT1|E2F1|IKBKG|TFDP1|DAPK2	http://amigo.geneontology.org/amigo/term/GO:0043276
SCF-dependent proteasomal ubiquitin-dependent protein catabolic process	Gene Ontology	GO:0031146	8	92	2.08252e-09	2.2479e-08	PSMD9|PSMB10|PSME4|PSMD12|PSMB9|PSMB8|PSMB3|PSMF1	http://amigo.geneontology.org/amigo/term/GO:0031146
autophagosome assembly	Gene Ontology	GO:0000045	7	59	2.97197e-09	3.18922e-08	WDR45|GABARAPL2|WIPI2|ATG14|ATG7|ATG9A|MAP1LC3B	http://amigo.geneontology.org/amigo/term/GO:0000045
death receptor binding	Gene Ontology	GO:0005123	5	15	6.29836e-09	6.56675e-08	RIPK1|CFLAR|BID|MYD88|CASP8	http://amigo.geneontology.org/amigo/term/GO:0005123
cellular response to lipopolysaccharide	Gene Ontology	GO:0071222	9	158	6.62228e-09	6.86547e-08	TNFRSF1B|CASP1|VIM|CD14|CAPN2|TLR4|NFKB1|IL1B|MYD88	http://amigo.geneontology.org/amigo/term/GO:0071222
cell surface receptor signaling pathway	Gene Ontology	GO:0007166	11	286	6.7494e-09	6.95795e-08	TNFSF10|TNFRSF10B|BIRC3|BIRC2|CASP8|MAPK3|CD14|MAPK1|TNFRSF25|TNFRSF10D|MYD88	http://amigo.geneontology.org/amigo/term/GO:0007166
endosome membrane	Gene Ontology	GO:0010008	10	220	7.36219e-09	7.528e-08	UBAP1|RPS27A|VPS37C|RIPK1|CD14|TLR4|UBC|MYD88|PLIN3|IRAK4	http://amigo.geneontology.org/amigo/term/GO:0010008
aging	Gene Ontology	GO:0007568	9	163	8.56888e-09	8.68724e-08	TNFRSF1B|MAPK3|CASP2|AKT1|MAPK1|ATG7|PPP3CA|STAT3|GSN	http://amigo.geneontology.org/amigo/term/GO:0007568
positive regulation of transcription, DNA-templated	Gene Ontology	GO:0045893	14	556	1.05572e-08	1.04153e-07	IRF1|STAT3|E2F1|IRF4|NFKB1|PSMD9|CHUK|IKBKB|AKT1|MAPK1|OPA1|UBE2V1|IL1B|PPP3CB	http://amigo.geneontology.org/amigo/term/GO:0045893
neuron apoptotic process	Gene Ontology	GO:0051402	6	40	1.16179e-08	1.14005e-07	BCL2L1|NLRP1|BID|ATM|XIAP|BOK	http://amigo.geneontology.org/amigo/term/GO:0051402
spermatoproteasome complex	Gene Ontology	GO:1990111	4	5	1.59398e-08	1.53138e-07	PSME4|PSMB10|PSMB9|PSMB8	http://amigo.geneontology.org/amigo/term/GO:1990111
TRAIL binding	Gene Ontology	GO:0045569	4	5	1.59398e-08	1.53138e-07	TNFRSF10C|TNFRSF10B|TNFSF10|TNFRSF10D	http://amigo.geneontology.org/amigo/term/GO:0045569
cellular response to tumor necrosis factor	Gene Ontology	GO:0071356	8	125	1.99617e-08	1.9078e-07	RIPK1|AKT1|CHUK|TRADD|IKBKB|MAPK3|MAPK1|NFKB1	http://amigo.geneontology.org/amigo/term/GO:0071356
proteasome-mediated ubiquitin-dependent protein catabolic process	Gene Ontology	GO:0043161	9	181	2.03469e-08	1.93454e-07	PSMD9|PSMB10|PSME4|BIRC2|PSMD12|PSMB9|PSMB8|PSMB3|PSMF1	http://amigo.geneontology.org/amigo/term/GO:0043161
proteasome core complex	Gene Ontology	GO:0005839	5	20	2.12908e-08	2.01385e-07	PSMF1|PSMB10|PSMB3|PSMB9|PSMB8	http://amigo.geneontology.org/amigo/term/GO:0005839
nucleotide-binding oligomerization domain containing signaling pathway	Gene Ontology	GO:0070423	5	21	2.62882e-08	2.44867e-07	UBE2V1|RPS27A|IKBKG|CASP8|UBC	http://amigo.geneontology.org/amigo/term/GO:0070423
regulation of necroptotic process	Gene Ontology	GO:0060544	4	6	2.64961e-08	2.45557e-07	CFLAR|BIRC3|BIRC2|CASP8	http://amigo.geneontology.org/amigo/term/GO:0060544
JNK cascade	Gene Ontology	GO:0007254	6	47	2.79249e-08	2.57498e-07	MAP2K4|RPS27A|IKBKG|UBC|UBE2V1|IRAK4	http://amigo.geneontology.org/amigo/term/GO:0007254
proteasomal ubiquitin-independent protein catabolic process	Gene Ontology	GO:0010499	5	22	3.21748e-08	2.95203e-07	PSME4|PSMB10|PSMB3|PSMB9|PSMB8	http://amigo.geneontology.org/amigo/term/GO:0010499
cytoplasmic side of plasma membrane	Gene Ontology	GO:0009898	6	52	4.85522e-08	4.38883e-07	TRAF1|TRAF3|CHUK|BIRC2|IKBKB|PPP3CA	http://amigo.geneontology.org/amigo/term/GO:0009898
death-inducing signaling complex assembly	Gene Ontology	GO:0071550	4	8	6.21258e-08	5.58828e-07	RIPK1|CASP8|TRADD|TNFRSF1A	http://amigo.geneontology.org/amigo/term/GO:0071550
DNA damage response, signal transduction by p53 class mediator resulting in cell cycle arrest	Gene Ontology	GO:0006977	6	56	7.29249e-08	6.4646e-07	CASP2|E2F1|ATM|TFDP2|CRADD|TFDP1	http://amigo.geneontology.org/amigo/term/GO:0006977
positive regulation of interleukin-1 beta production	Gene Ontology	GO:0032731	6	57	8.0377e-08	7.09095e-07	NLRP1|CASP1|CASP8|CARD8|TLR4|STAT3	http://amigo.geneontology.org/amigo/term/GO:0032731
protein kinase binding	Gene Ontology	GO:0019901	12	461	8.81595e-08	7.65552e-07	BCL2L1|YWHAZ|TRAF3|STAT3|WDR45|E2F1|MAP3K1|PRKCD|IKBKB|PRKAG2|UBE2V1|BCL2L11	http://amigo.geneontology.org/amigo/term/GO:0019901
transmembrane transport	Gene Ontology	GO:0055085	10	296	1.08138e-07	9.31609e-07	RPS27A|PSMD9|PSMB10|PSME4|PSMB8|PSMD12|PSMB9|UBC|PSMB3|PSMF1	http://amigo.geneontology.org/amigo/term/GO:0055085
regulation of I-kappaB kinase/NF-kappaB signaling	Gene Ontology	GO:0043122	5	29	1.08799e-07	9.32927e-07	TRAF1|IL1B|TRAF3|CARD8|IKBKG	http://amigo.geneontology.org/amigo/term/GO:0043122
protein heterodimerization activity	Gene Ontology	GO:0046982	10	297	1.11459e-07	9.51288e-07	BCL2L1|RRAGC|PSMF1|CHUK|IKBKB|BOK|PIK3R2|TLR4|MCL1|IKBKG	http://amigo.geneontology.org/amigo/term/GO:0046982
tumor necrosis factor-activated receptor activity	Gene Ontology	GO:0005031	4	10	1.2497e-07	1.06167e-06	FAS|TNFRSF1B|TNFRSF25|TNFRSF1A	http://amigo.geneontology.org/amigo/term/GO:0005031
positive regulation of cell migration	Gene Ontology	GO:0030335	9	227	1.30415e-07	1.10282e-06	IGF1R|STAT3|ATM|PIK3CD|TRADD|AKT2|PRKACA|PPP3CA|IL1B	http://amigo.geneontology.org/amigo/term/GO:0030335
positive regulation of gene expression	Gene Ontology	GO:0010628	11	391	1.46558e-07	1.21727e-06	STAT3|E2F1|AKT1|ATM|PIK3CD|MAPK3|MAPK1|TLR4|IL1B|MYD88|GSN	http://amigo.geneontology.org/amigo/term/GO:0010628
tumor necrosis factor receptor binding	Gene Ontology	GO:0005164	5	31	1.46603e-07	1.21727e-06	TRAF3|TRAF1|TNFSF10|CASP8|TRADD	http://amigo.geneontology.org/amigo/term/GO:0005164
perinuclear region of cytoplasm	Gene Ontology	GO:0048471	14	697	1.60662e-07	1.32799e-06	MTMR14|TNFRSF1B|TNFRSF25|PSMF1|PRKCD|NFKBIE|PINK1|PRKACA|TLR4|YWHAB|PLEC|TSC1|PAK2|GSN	http://amigo.geneontology.org/amigo/term/GO:0048471
positive regulation of mitochondrial membrane potential	Gene Ontology	GO:0010918	4	11	1.69964e-07	1.37394e-06	MFN1|AKT1|AKT2|BID	http://amigo.geneontology.org/amigo/term/GO:0010918
proteasome core complex, beta-subunit complex	Gene Ontology	GO:0019774	4	11	1.69964e-07	1.37394e-06	PSMB10|PSMB3|PSMB9|PSMB8	http://amigo.geneontology.org/amigo/term/GO:0019774
CD40 receptor complex	Gene Ontology	GO:0035631	4	11	1.69964e-07	1.37394e-06	IKBKB|TRAF3|BIRC2|CHUK	http://amigo.geneontology.org/amigo/term/GO:0035631
negative regulation of canonical Wnt signaling pathway	Gene Ontology	GO:0090090	8	176	2.46126e-07	1.95515e-06	PSMD9|PSMB10|PSME4|PSMD12|PSMB9|PSMB8|PSMB3|PSMF1	http://amigo.geneontology.org/amigo/term/GO:0090090
transcription factor binding	Gene Ontology	GO:0008134	10	325	2.49325e-07	1.97203e-06	YWHAZ|STAT3|E2F1|IRF4|NFKBIA|MAPK1|ATG7|NFKB1|TFDP2|TFDP1	http://amigo.geneontology.org/amigo/term/GO:0008134
negative regulation of extrinsic apoptotic signaling pathway in absence of ligand	Gene Ontology	GO:2001240	5	35	2.53105e-07	1.98482e-06	BCL2L1|AKT1|IL1B|RIPK1|MCL1	http://amigo.geneontology.org/amigo/term/GO:2001240
positive regulation of intrinsic apoptotic signaling pathway	Gene Ontology	GO:2001244	5	35	2.53105e-07	1.98482e-06	BCL2L1|BCAP31|BID|BOK|BCL2L11	http://amigo.geneontology.org/amigo/term/GO:2001244
positive regulation of protein phosphorylation	Gene Ontology	GO:0001934	8	178	2.67288e-07	2.08712e-06	MAPK3|FAS|RIPK1|AKT1|AKT2|ATG14|PINK1|IL1B	http://amigo.geneontology.org/amigo/term/GO:0001934
focal adhesion	Gene Ontology	GO:0005925	11	418	2.79709e-07	2.17486e-06	YWHAZ|IRF2|DYNLL1|CHP1|VIM|MAPK3|MAPK1|PLEC|CAPN2|YWHAB|GSN	http://amigo.geneontology.org/amigo/term/GO:0005925
negative regulation of cysteine-type endopeptidase activity involved in apoptotic process	Gene Ontology	GO:0043154	6	72	2.91419e-07	2.24687e-06	CFLAR|BIRC5|BIRC3|BIRC2|AKT1|XIAP	http://amigo.geneontology.org/amigo/term/GO:0043154
phosphatidylinositol 3-kinase signaling	Gene Ontology	GO:0014065	5	37	3.25431e-07	2.47787e-06	AKT1|PIK3R5|IGF1R|PIK3R2|PIK3CD	http://amigo.geneontology.org/amigo/term/GO:0014065
cellular response to cadmium ion	Gene Ontology	GO:0071276	5	39	4.13202e-07	3.10748e-06	MAPK3|MAPK1|AKT1|CHUK|GSN	http://amigo.geneontology.org/amigo/term/GO:0071276
positive regulation of inflammatory response	Gene Ontology	GO:0050729	6	81	5.58773e-07	4.15121e-06	TNFRSF1A|NFKBIA|TRADD|RIPK1|TLR4|IL1B	http://amigo.geneontology.org/amigo/term/GO:0050729
endopeptidase activity	Gene Ontology	GO:0004175	6	81	5.58773e-07	4.15121e-06	ELANE|CASP1|PSMB10|PSMB9|PSMB8|PSMB3	http://amigo.geneontology.org/amigo/term/GO:0004175
protein homodimerization activity	Gene Ontology	GO:0042803	13	660	5.64657e-07	4.17801e-06	BCL2L1|RIPK1|STAT3|CARD8|PSMF1|CHUK|IKBKB|AKT1|BOK|ATG7|MCL1|BNIP3L|IKBKG	http://amigo.geneontology.org/amigo/term/GO:0042803
innate immune response	Gene Ontology	GO:0045087	12	558	6.41122e-07	4.72473e-06	CASP4|TRAF3|NLRP1|PIK3CD|CHUK|IKBKB|CD14|IKBKG|TLR4|IL1RAP|MYD88|IRAK4	http://amigo.geneontology.org/amigo/term/GO:0045087
toll-like receptor signaling pathway	Gene Ontology	GO:0002224	5	44	7.157e-07	5.15023e-06	TRAF3|CD14|MYD88|IRAK4|TLR4	http://amigo.geneontology.org/amigo/term/GO:0002224
extrinsic apoptotic signaling pathway	Gene Ontology	GO:0097191	5	44	7.157e-07	5.15023e-06	RIPK1|FAS|TNFRSF1B|CASP8|TRADD	http://amigo.geneontology.org/amigo/term/GO:0097191
T cell activation	Gene Ontology	GO:0042110	5	44	7.157e-07	5.15023e-06	PPP3CA|PPP3CB|PIK3CD|CASP8|IRF4	http://amigo.geneontology.org/amigo/term/GO:0042110
cellular response to amino acid starvation	Gene Ontology	GO:0034198	5	44	7.157e-07	5.15023e-06	MAPK1|FAS|RRAGB|RRAGC|MAPK3	http://amigo.geneontology.org/amigo/term/GO:0034198
kinase activity	Gene Ontology	GO:0016301	6	89	9.40522e-07	6.7154e-06	PIK3CD|AKT1|MAPK1|MAP3K14|PINK1|PAK2	http://amigo.geneontology.org/amigo/term/GO:0016301
endosomal transport	Gene Ontology	GO:0016197	6	91	1.06344e-06	7.5344e-06	UBAP1|RPS27A|VPS37C|CHMP2B|UBC|CHMP7	http://amigo.geneontology.org/amigo/term/GO:0016197
intracellular transport of virus	Gene Ontology	GO:0075733	5	49	1.17089e-06	8.23215e-06	RPS27A|UBAP1|KPNB1|VPS37C|UBC	http://amigo.geneontology.org/amigo/term/GO:0075733
host cell	Gene Ontology	GO:0043657	5	50	1.28448e-06	8.96204e-06	RPS27A|UBAP1|KPNB1|VPS37C|UBC	http://amigo.geneontology.org/amigo/term/GO:0043657
necroptotic process	Gene Ontology	GO:0070266	4	20	1.29202e-06	8.98053e-06	RIPK1|CD14|BIRC2|TLR4	http://amigo.geneontology.org/amigo/term/GO:0070266
extracellular region	Gene Ontology	GO:0005576	21	1843	1.38703e-06	9.60453e-06	CASP4|TNFSF10|TNFRSF1B|E2F1|IL1RAP|TNFRSF1A|NFKB1|ENDOD1|KPNB1|PRKCD|PSMD12|MAPK1|CD14|ELANE|ATG7|TNFRSF25|DYNC1H1|DBNL|IL1B|TUBB4B|GSN	http://amigo.geneontology.org/amigo/term/GO:0005576
cellular response to amino acid stimulus	Gene Ontology	GO:0071230	5	51	1.40657e-06	9.70319e-06	BCL2L1|LAMTOR4|CAPN2|RRAGC|RRAGB	http://amigo.geneontology.org/amigo/term/GO:0071230
microtubule	Gene Ontology	GO:0005874	9	305	1.41763e-06	9.74289e-06	DYNLL1|TUBB6|TUBB4B|TUBA1A|TUBB1|DYNC1LI1|DYNC1LI2|DYNC1H1|MAP1LC3B	http://amigo.geneontology.org/amigo/term/GO:0005874
cytoplasmic dynein complex	Gene Ontology	GO:0005868	4	21	1.53407e-06	1.0426e-05	DYNLL1|DYNC1LI1|DYNC1LI2|DYNC1H1	http://amigo.geneontology.org/amigo/term/GO:0005868
threonine-type endopeptidase activity	Gene Ontology	GO:0004298	4	21	1.53407e-06	1.0426e-05	PSMB10|PSMB3|PSMB9|PSMB8	http://amigo.geneontology.org/amigo/term/GO:0004298
regulation of innate immune response	Gene Ontology	GO:0045088	4	21	1.53407e-06	1.0426e-05	XIAP|IRF1|BIRC3|BIRC2	http://amigo.geneontology.org/amigo/term/GO:0045088
structural constituent of cytoskeleton	Gene Ontology	GO:0005200	6	101	1.89157e-06	1.27144e-05	TUBB6|TUBB4B|TUBA1A|VIM|PLEC|TUBB1	http://amigo.geneontology.org/amigo/term/GO:0005200
platelet activation	Gene Ontology	GO:0030168	6	102	1.99728e-06	1.33759e-05	YWHAZ|PRKCD|MAPK3|PIK3R5|MAPK1|PRKACA	http://amigo.geneontology.org/amigo/term/GO:0030168
phagophore assembly site	Gene Ontology	GO:0000407	4	23	2.11708e-06	1.40656e-05	WIPI2|ATG9A|ATG7|WDR45	http://amigo.geneontology.org/amigo/term/GO:0000407
positive regulation of apoptotic signaling pathway	Gene Ontology	GO:2001235	4	23	2.11708e-06	1.40656e-05	FAS|CASP2|PRKCD|CRADD	http://amigo.geneontology.org/amigo/term/GO:2001235
death domain binding	Gene Ontology	GO:0070513	3	5	2.13092e-06	1.40656e-05	RIPK1|CRADD|TRADD	http://amigo.geneontology.org/amigo/term/GO:0070513
calcineurin complex	Gene Ontology	GO:0005955	3	5	2.13092e-06	1.40656e-05	PPP3CA|PPP3CB|PPP3R1	http://amigo.geneontology.org/amigo/term/GO:0005955
proteasome complex	Gene Ontology	GO:0000502	5	57	2.34416e-06	1.54177e-05	PSMD12|PSMB10|PSMB3|PSMB9|PSMB8	http://amigo.geneontology.org/amigo/term/GO:0000502
protease binding	Gene Ontology	GO:0002020	6	107	2.60071e-06	1.69833e-05	ELANE|RPS27A|CFLAR|UBC|PINK1|CRADD	http://amigo.geneontology.org/amigo/term/GO:0002020
protein autophosphorylation	Gene Ontology	GO:0046777	7	170	2.67273e-06	1.73917e-05	IGF1R|ATM|RIPK1|AKT1|PRKX|DAPK2|DAPK1	http://amigo.geneontology.org/amigo/term/GO:0046777
cysteine-type endopeptidase inhibitor activity involved in apoptotic process	Gene Ontology	GO:0043027	4	25	2.85004e-06	1.84799e-05	XIAP|BIRC5|BIRC3|BIRC2	http://amigo.geneontology.org/amigo/term/GO:0043027
scaffold protein binding	Gene Ontology	GO:0097110	5	60	2.96783e-06	1.9176e-05	IKBKB|MAPK3|CHUK|CASP8|VIM	http://amigo.geneontology.org/amigo/term/GO:0097110
ripoptosome	Gene Ontology	GO:0097342	3	6	3.18841e-06	2.0315e-05	RIPK1|CFLAR|CASP8	http://amigo.geneontology.org/amigo/term/GO:0097342
TRAIL-activated apoptotic signaling pathway	Gene Ontology	GO:0036462	3	6	3.18841e-06	2.0315e-05	TNFRSF10C|TNFRSF10B|CASP8	http://amigo.geneontology.org/amigo/term/GO:0036462
CD95 death-inducing signaling complex	Gene Ontology	GO:0031265	3	6	3.18841e-06	2.0315e-05	FAS|CASP8|CFLAR	http://amigo.geneontology.org/amigo/term/GO:0031265
Bcl-2 family protein complex	Gene Ontology	GO:0097136	3	6	3.18841e-06	2.0315e-05	BCL2L1|BCL2L11|MCL1	http://amigo.geneontology.org/amigo/term/GO:0097136
cysteine-type peptidase activity	Gene Ontology	GO:0008234	4	28	4.28105e-06	2.69956e-05	CASP5|CAPN2|CASP8|ATG4D	http://amigo.geneontology.org/amigo/term/GO:0008234
positive regulation of release of cytochrome c from mitochondria	Gene Ontology	GO:0090200	4	28	4.28105e-06	2.69956e-05	PINK1|BID|TNFSF10|BCL2L11	http://amigo.geneontology.org/amigo/term/GO:0090200
lysosome	Gene Ontology	GO:0005764	8	262	4.35528e-06	2.73697e-05	RRAGC|RRAGB|CHMP2B|CAPN2|DYNC1LI2|LAMTOR4|IL1B|LAMP2	http://amigo.geneontology.org/amigo/term/GO:0005764
inhibition of cysteine-type endopeptidase activity involved in apoptotic process	Gene Ontology	GO:1990001	3	7	4.54351e-06	2.84551e-05	XIAP|BIRC3|BIRC2	http://amigo.geneontology.org/amigo/term/GO:1990001
type I interferon signaling pathway	Gene Ontology	GO:0060337	5	66	4.6023e-06	2.87252e-05	IRF2|IRF1|MYD88|IRF4|PSMB8	http://amigo.geneontology.org/amigo/term/GO:0060337
ficolin-1-rich granule lumen	Gene Ontology	GO:1904813	6	123	5.60053e-06	3.48372e-05	DBNL|KPNB1|PSMD12|MAPK1|ATG7|GSN	http://amigo.geneontology.org/amigo/term/GO:1904813
positive regulation of histone phosphorylation	Gene Ontology	GO:0033129	3	8	6.23176e-06	3.81176e-05	MAPK3|IL1B|ATM	http://amigo.geneontology.org/amigo/term/GO:0033129
peptidyl-serine autophosphorylation	Gene Ontology	GO:0036289	3	8	6.23176e-06	3.81176e-05	RIPK1|PINK1|ATM	http://amigo.geneontology.org/amigo/term/GO:0036289
regulation of establishment of endothelial barrier	Gene Ontology	GO:1903140	3	8	6.23176e-06	3.81176e-05	IKBKB|IL1B|TNFRSF1A	http://amigo.geneontology.org/amigo/term/GO:1903140
Bergmann glial cell differentiation	Gene Ontology	GO:0060020	3	8	6.23176e-06	3.81176e-05	MAPK3|MAPK1|VIM	http://amigo.geneontology.org/amigo/term/GO:0060020
autophagy	Gene Ontology	GO:0006914	6	126	6.39289e-06	3.89733e-05	WDR45|GABARAPL2|CHMP2B|ATG7|ATG4D|MAP1LC3B	http://amigo.geneontology.org/amigo/term/GO:0006914
GTP binding	Gene Ontology	GO:0005525	9	373	6.95846e-06	4.21412e-05	RRAGC|RRAGB|TUBB6|TUBB4B|TUBA1A|TUBB1|MFN1|DYNC1LI1|DAPK1	http://amigo.geneontology.org/amigo/term/GO:0005525
microtubule-based process	Gene Ontology	GO:0007017	4	32	6.93906e-06	4.21412e-05	TUBB6|TUBB4B|TUBA1A|TUBB1	http://amigo.geneontology.org/amigo/term/GO:0007017
protein-containing complex assembly	Gene Ontology	GO:0065003	6	129	7.27388e-06	4.39065e-05	TRAF1|FAS|BID|MAPK3|IKBKG|IL1RAP	http://amigo.geneontology.org/amigo/term/GO:0065003
autophagosome	Gene Ontology	GO:0005776	5	73	7.32149e-06	4.4049e-05	WIPI2|ATG9A|MAP1LC3B|ATG14|GABARAPL2	http://amigo.geneontology.org/amigo/term/GO:0005776
calmodulin binding	Gene Ontology	GO:0005516	7	200	7.4803e-06	4.48574e-05	PPP3R1|FAS|AKT1|PPP3CA|PPP3CB|DAPK2|DAPK1	http://amigo.geneontology.org/amigo/term/GO:0005516
cell cycle arrest	Gene Ontology	GO:0007050	6	130	7.5885e-06	4.5358e-05	IRF1|PRKAG2|RRAGC|RRAGB|ATM|LAMTOR4	http://amigo.geneontology.org/amigo/term/GO:0007050
autophagosome maturation	Gene Ontology	GO:0097352	4	33	7.75966e-06	4.60808e-05	WIPI2|MAP1LC3B|LAMP2|GABARAPL2	http://amigo.geneontology.org/amigo/term/GO:0097352
positive regulation of macroautophagy	Gene Ontology	GO:0016239	4	33	7.75966e-06	4.60808e-05	PINK1|BNIP3L|IKBKG|TSC1	http://amigo.geneontology.org/amigo/term/GO:0016239
IkappaB kinase complex	Gene Ontology	GO:0008385	3	9	8.2883e-06	4.89037e-05	IKBKB|CHUK|IKBKG	http://amigo.geneontology.org/amigo/term/GO:0008385
NLRP3 inflammasome complex	Gene Ontology	GO:0072559	3	9	8.2883e-06	4.89037e-05	CASP4|CARD8|CASP1	http://amigo.geneontology.org/amigo/term/GO:0072559
microtubule cytoskeleton organization	Gene Ontology	GO:0000226	6	133	8.59916e-06	5.05752e-05	TUBB6|TUBB4B|TUBA1A|TUBB1|DYNC1LI1|DYNC1LI2	http://amigo.geneontology.org/amigo/term/GO:0000226
proteasomal protein catabolic process	Gene Ontology	GO:0010498	4	34	8.64972e-06	5.071e-05	PSMB10|PSMB3|PSMB9|PSMB8	http://amigo.geneontology.org/amigo/term/GO:0010498
phosphatidylinositol biosynthetic process	Gene Ontology	GO:0006661	5	76	8.8135e-06	5.15056e-05	PIK3CD|PIK3R5|MTMR14|MTMR3|PIK3R2	http://amigo.geneontology.org/amigo/term/GO:0006661
autophagosome membrane	Gene Ontology	GO:0000421	4	35	9.61289e-06	5.58217e-05	ATG9A|MAP1LC3B|ATG14|GABARAPL2	http://amigo.geneontology.org/amigo/term/GO:0000421
cellular response to reactive oxygen species	Gene Ontology	GO:0034614	4	35	9.61289e-06	5.58217e-05	MAPK3|MAPK1|CHUK|AKT1	http://amigo.geneontology.org/amigo/term/GO:0034614
response to lipopolysaccharide	Gene Ontology	GO:0032496	6	137	1.01136e-05	5.85442e-05	CSF2RB|ELANE|CHUK|CASP8|TLR4|IL1B	http://amigo.geneontology.org/amigo/term/GO:0032496
protein import into nucleus	Gene Ontology	GO:0006606	5	79	1.05332e-05	6.07813e-05	NFKBIA|AKT1|KPNB1|STAT3|PPP3CA	http://amigo.geneontology.org/amigo/term/GO:0006606
cellular response to oxidised low-density lipoprotein particle stimulus	Gene Ontology	GO:0140052	3	10	1.07479e-05	6.12499e-05	AKT1|MYD88|TLR4	http://amigo.geneontology.org/amigo/term/GO:0140052
peptidase activator activity	Gene Ontology	GO:0016504	3	10	1.07479e-05	6.12499e-05	PINK1|CFLAR|PSME4	http://amigo.geneontology.org/amigo/term/GO:0016504
negative regulation of cell size	Gene Ontology	GO:0045792	3	10	1.07479e-05	6.12499e-05	AKT1|AKT1S1|TSC1	http://amigo.geneontology.org/amigo/term/GO:0045792
regulation of stress-activated MAPK cascade	Gene Ontology	GO:0032872	3	10	1.07479e-05	6.12499e-05	FAS|MAPK1|MAPK3	http://amigo.geneontology.org/amigo/term/GO:0032872
negative regulation of NF-kappaB transcription factor activity	Gene Ontology	GO:0032088	5	80	1.11611e-05	6.3212e-05	CARD8|NFKBIA|CHP1|CHUK|TRAF3	http://amigo.geneontology.org/amigo/term/GO:0032088
positive regulation of JNK cascade	Gene Ontology	GO:0046330	5	80	1.11611e-05	6.3212e-05	RIPK1|TRAF1|IL1B|TRAF3|TLR4	http://amigo.geneontology.org/amigo/term/GO:0046330
late endosome	Gene Ontology	GO:0005770	6	140	1.13855e-05	6.42843e-05	CHMP2B|MAPK3|MAPK1|LAMP2|DYNC1LI2|ATG9A	http://amigo.geneontology.org/amigo/term/GO:0005770
hepatocyte apoptotic process	Gene Ontology	GO:0097284	3	11	1.36451e-05	7.58751e-05	BCL2L1|BID|GSN	http://amigo.geneontology.org/amigo/term/GO:0097284
transferrin receptor binding	Gene Ontology	GO:1990459	3	11	1.36451e-05	7.58751e-05	IKBKB|CHUK|IKBKG	http://amigo.geneontology.org/amigo/term/GO:1990459
protein lipidation	Gene Ontology	GO:0006497	3	11	1.36451e-05	7.58751e-05	WIPI2|ATG7|WDR45	http://amigo.geneontology.org/amigo/term/GO:0006497
positive regulation of tumor necrosis factor-mediated signaling pathway	Gene Ontology	GO:1903265	3	11	1.36451e-05	7.58751e-05	RIPK1|CASP4|CASP1	http://amigo.geneontology.org/amigo/term/GO:1903265
protein localization to phagophore assembly site	Gene Ontology	GO:0034497	3	12	1.70139e-05	9.34746e-05	WIPI2|ATG9A|WDR45	http://amigo.geneontology.org/amigo/term/GO:0034497
I-kappaB phosphorylation	Gene Ontology	GO:0007252	3	12	1.70139e-05	9.34746e-05	IKBKB|CHUK|TLR4	http://amigo.geneontology.org/amigo/term/GO:0007252
calcineurin-NFAT signaling cascade	Gene Ontology	GO:0033173	3	12	1.70139e-05	9.34746e-05	PPP3CA|PPP3CB|PPP3R1	http://amigo.geneontology.org/amigo/term/GO:0033173
cellular response to amyloid-beta	Gene Ontology	GO:1904646	4	41	1.71402e-05	9.38874e-05	IGF1R|BCL2L11|CASP4|TLR4	http://amigo.geneontology.org/amigo/term/GO:1904646
protein transport	Gene Ontology	GO:0015031	8	320	1.78554e-05	9.75136e-05	UBAP1|GABARAPL2|CHMP2B|ATG7|ATG4D|ATG9A|CHMP7|PIK3R2	http://amigo.geneontology.org/amigo/term/GO:0015031
cysteine-type endopeptidase activity	Gene Ontology	GO:0004197	5	89	1.82256e-05	9.92403e-05	CASP4|CASP5|CASP2|CASP8|CASP1	http://amigo.geneontology.org/amigo/term/GO:0004197
activation of MAPKK activity	Gene Ontology	GO:0000186	4	42	1.87232e-05	0.000101648	MAPK3|MAP3K1|MAP3K14|MAPK1	http://amigo.geneontology.org/amigo/term/GO:0000186
azurophil granule lumen	Gene Ontology	GO:0035578	5	90	1.91859e-05	0.000103853	TUBB4B|ELANE|MAPK1|PRKCD|DYNC1H1	http://amigo.geneontology.org/amigo/term/GO:0035578
immune response	Gene Ontology	GO:0006955	9	427	1.98424e-05	0.000107091	IGF1R|TNFSF10|FAS|CHUK|MAP3K14|IKBKG|TLR4|IL1RAP|IL1B	http://amigo.geneontology.org/amigo/term/GO:0006955
intracellular membrane-bounded organelle	Gene Ontology	GO:0043231	12	788	2.00111e-05	0.000107684	UBAP1|RRAGC|ATM|VPS37C|IGF1R|CHUK|AKT2|MAP3K14|LAMTOR4|ATG9A|MAP1LC3B|DAPK2	http://amigo.geneontology.org/amigo/term/GO:0043231
positive regulation of macrophage differentiation	Gene Ontology	GO:0045651	3	13	2.0888e-05	0.000111423	RIPK1|PRKACA|CASP8	http://amigo.geneontology.org/amigo/term/GO:0045651
interleukin-1 receptor binding	Gene Ontology	GO:0005149	3	13	2.0888e-05	0.000111423	IL1B|IRAK4|IL1RAP	http://amigo.geneontology.org/amigo/term/GO:0005149
cellular response to nitrogen starvation	Gene Ontology	GO:0006995	3	13	2.0888e-05	0.000111423	MAP1LC3B|ATG7|GABARAPL2	http://amigo.geneontology.org/amigo/term/GO:0006995
thymus development	Gene Ontology	GO:0048538	4	44	2.2208e-05	0.00011744	MAPK3|ATM|BCL2L11|MAPK1	http://amigo.geneontology.org/amigo/term/GO:0048538
proteolysis	Gene Ontology	GO:0006508	9	434	2.24781e-05	0.000118527	CASP4|CASP5|E2F1|CASP1|ELANE|CASP8|CFLAR|CAPN2|ATG4D	http://amigo.geneontology.org/amigo/term/GO:0006508
cellular response to organic cyclic compound	Gene Ontology	GO:0071407	4	45	2.41184e-05	0.000126812	AKT1|IL1B|STAT3|CASP8	http://amigo.geneontology.org/amigo/term/GO:0071407
cellular response to interferon-gamma	Gene Ontology	GO:0071346	5	95	2.45933e-05	0.000128939	VIM|CASP1|DAPK1|TLR4|GSN	http://amigo.geneontology.org/amigo/term/GO:0071346
interleukin-1 beta production	Gene Ontology	GO:0032611	3	14	2.53009e-05	0.000131895	IL1B|TLR4|CASP1	http://amigo.geneontology.org/amigo/term/GO:0032611
negative regulation of oxidative stress-induced neuron death	Gene Ontology	GO:1903204	3	14	2.53009e-05	0.000131895	PINK1|ATG7|TSC1	http://amigo.geneontology.org/amigo/term/GO:1903204
kinase binding	Gene Ontology	GO:0019900	5	97	2.70604e-05	0.000140668	FAS|CHP1|PRKCD|TRADD|CASP1	http://amigo.geneontology.org/amigo/term/GO:0019900
post-translational protein modification	Gene Ontology	GO:0043687	8	342	2.8354e-05	0.000146613	PSMD9|PSMB10|PSME4|PSMD12|PSMB9|PSMB8|PSMB3|PSMF1	http://amigo.geneontology.org/amigo/term/GO:0043687
response to ethanol	Gene Ontology	GO:0045471	5	98	2.83639e-05	0.000146613	CD14|STAT3|BIRC2|CASP8|GSN	http://amigo.geneontology.org/amigo/term/GO:0045471
negative regulation of macroautophagy	Gene Ontology	GO:0016242	3	15	3.02855e-05	0.000155669	PINK1|AKT1|TSC1	http://amigo.geneontology.org/amigo/term/GO:0016242
negative regulation of neuron death	Gene Ontology	GO:1901215	4	50	3.55288e-05	0.00018211	TNFRSF1B|STAT3|IKBKG|AKT1	http://amigo.geneontology.org/amigo/term/GO:1901215
CARD domain binding	Gene Ontology	GO:0050700	3	16	3.58744e-05	0.000182353	CASP4|CARD8|CASP1	http://amigo.geneontology.org/amigo/term/GO:0050700
phagophore assembly site membrane	Gene Ontology	GO:0034045	3	16	3.58744e-05	0.000182353	WIPI2|ATG14|WDR45	http://amigo.geneontology.org/amigo/term/GO:0034045
calcium-dependent protein kinase C activity	Gene Ontology	GO:0004698	3	16	3.58744e-05	0.000182353	PRKACA|PRKCD|PAK2	http://amigo.geneontology.org/amigo/term/GO:0004698
positive regulation of type I interferon production	Gene Ontology	GO:0032481	4	52	4.1046e-05	0.000207492	NFKB1|IRF1|MYD88|CD14	http://amigo.geneontology.org/amigo/term/GO:0032481
positive regulation of neuron apoptotic process	Gene Ontology	GO:0043525	4	52	4.1046e-05	0.000207492	BCL2L11|ATM|CASP2|MAP2K4	http://amigo.geneontology.org/amigo/term/GO:0043525
cysteine-type endopeptidase activator activity involved in apoptotic process	Gene Ontology	GO:0008656	3	17	4.21002e-05	0.000211654	CARD8|NLRP1|CASP1	http://amigo.geneontology.org/amigo/term/GO:0008656
apoptotic mitochondrial changes	Gene Ontology	GO:0008637	3	17	4.21002e-05	0.000211654	BCL2L1|AKT1|BID	http://amigo.geneontology.org/amigo/term/GO:0008637
cortical actin cytoskeleton	Gene Ontology	GO:0030864	4	53	4.40278e-05	0.00022074	DBNL|DYNLL1|CAPN2|GSN	http://amigo.geneontology.org/amigo/term/GO:0030864
pseudopodium	Gene Ontology	GO:0031143	3	18	4.89946e-05	0.000243645	MAPK3|MAPK1|CAPN2	http://amigo.geneontology.org/amigo/term/GO:0031143
toll-like receptor 4 signaling pathway	Gene Ontology	GO:0034142	3	18	4.89946e-05	0.000243645	CD14|NFKBIA|TLR4	http://amigo.geneontology.org/amigo/term/GO:0034142
MAP kinase kinase activity	Gene Ontology	GO:0004708	3	18	4.89946e-05	0.000243645	MAPK3|MAPK1|MAP2K4	http://amigo.geneontology.org/amigo/term/GO:0004708
phosphatidylinositol-mediated signaling	Gene Ontology	GO:0048015	4	55	5.0462e-05	0.00024959	IGF1R|PIK3CD|PIK3R2|GSN	http://amigo.geneontology.org/amigo/term/GO:0048015
positive regulation of DNA-binding transcription factor activity	Gene Ontology	GO:0051091	5	112	5.22608e-05	0.000257792	PINK1|AKT1|IL1B|TFDP1|PPP3CA	http://amigo.geneontology.org/amigo/term/GO:0051091
cellular response to hypoxia	Gene Ontology	GO:0071456	5	114	5.66582e-05	0.000277989	PINK1|AKT1|BNIP3L|E2F1|CFLAR	http://amigo.geneontology.org/amigo/term/GO:0071456
secretory granule lumen	Gene Ontology	GO:0034774	5	114	5.66582e-05	0.000277989	NFKB1|PSMD12|DBNL|ATG7|GSN	http://amigo.geneontology.org/amigo/term/GO:0034774
viral budding via host ESCRT complex	Gene Ontology	GO:0039702	3	20	6.49159e-05	0.000317655	CHMP2B|CHMP7|VPS37C	http://amigo.geneontology.org/amigo/term/GO:0039702
phagocytosis	Gene Ontology	GO:0006909	4	60	6.95265e-05	0.000338411	CD14|MYD88|ELANE|TLR4	http://amigo.geneontology.org/amigo/term/GO:0006909
centrosome	Gene Ontology	GO:0005813	9	506	7.18309e-05	0.000348703	BCL2L1|DYNLL1|E2F1|DYNC1LI1|DYNC1LI2|DYNC1H1|UBE2V1|PAK2|PRKAR1A	http://amigo.geneontology.org/amigo/term/GO:0005813
RNA polymerase II transcription regulator complex	Gene Ontology	GO:0090575	4	61	7.3891e-05	0.000356428	E2F1|STAT3|TFDP2|TFDP1	http://amigo.geneontology.org/amigo/term/GO:0090575
phosphatidylinositol 3-kinase complex	Gene Ontology	GO:0005942	3	21	7.4005e-05	0.000356428	PIK3R5|PIK3CD|PIK3R2	http://amigo.geneontology.org/amigo/term/GO:0005942
positive regulation of cytokine production involved in inflammatory response	Gene Ontology	GO:1900017	3	21	7.4005e-05	0.000356428	MYD88|STAT3|TLR4	http://amigo.geneontology.org/amigo/term/GO:1900017
regulation of cell cycle	Gene Ontology	GO:0051726	5	121	7.43371e-05	0.000357091	IRF1|STAT3|BIRC2|E2F1|TSC1	http://amigo.geneontology.org/amigo/term/GO:0051726
defense response to virus	Gene Ontology	GO:0051607	6	200	7.84313e-05	0.000375774	BCL2L1|IRF2|IRF1|BNIP3L|MAP3K14|ATG7	http://amigo.geneontology.org/amigo/term/GO:0051607
release of cytochrome c from mitochondria	Gene Ontology	GO:0001836	3	22	8.38874e-05	0.000400868	BCL2L1|BID|BOK	http://amigo.geneontology.org/amigo/term/GO:0001836
peptidyl-threonine phosphorylation	Gene Ontology	GO:0018107	4	65	9.33629e-05	0.000443837	AKT1|MAPK1|PRKACA|PRKCD	http://amigo.geneontology.org/amigo/term/GO:0018107
negative regulation of intrinsic apoptotic signaling pathway	Gene Ontology	GO:2001243	3	23	9.45934e-05	0.000447368	BCL2L1|PINK1|MCL1	http://amigo.geneontology.org/amigo/term/GO:2001243
integral component of mitochondrial outer membrane	Gene Ontology	GO:0031307	3	23	9.45934e-05	0.000447368	PINK1|MFN1|FUNDC1	http://amigo.geneontology.org/amigo/term/GO:0031307
positive regulation of NIK/NF-kappaB signaling	Gene Ontology	GO:1901224	4	66	9.87613e-05	0.000464685	IL1B|TRADD|CD14|TLR4	http://amigo.geneontology.org/amigo/term/GO:1901224
phagocytic vesicle	Gene Ontology	GO:0045335	4	66	9.87613e-05	0.000464685	ELANE|VIM|ATG14|GSN	http://amigo.geneontology.org/amigo/term/GO:0045335
defense response to bacterium	Gene Ontology	GO:0042742	6	209	9.9185e-05	0.000465485	ELANE|NLRP1|TNFRSF1A|PRKCD|TLR4|MYD88	http://amigo.geneontology.org/amigo/term/GO:0042742
cadherin binding	Gene Ontology	GO:0045296	7	305	0.000101918	0.000477091	YWHAZ|DBNL|CHMP2B|PLEC|YWHAB|PLIN3|PAK2	http://amigo.geneontology.org/amigo/term/GO:0045296
extrinsic component of membrane	Gene Ontology	GO:0019898	4	67	0.000104383	0.000487385	WIPI2|BCL2L11|MTMR3|WDR45	http://amigo.geneontology.org/amigo/term/GO:0019898
membrane organization	Gene Ontology	GO:0061024	5	133	0.000114202	0.000529195	YWHAB|YWHAZ|RPS27A|CHP1|UBC	http://amigo.geneontology.org/amigo/term/GO:0061024
mitotic cell cycle	Gene Ontology	GO:0000278	5	134	0.000118143	0.000546075	TUBB6|TUBB4B|TUBA1A|TUBB1|DYNC1H1	http://amigo.geneontology.org/amigo/term/GO:0000278
regulation of macroautophagy	Gene Ontology	GO:0016241	4	70	0.000122641	0.000565442	LAMTOR4|PRKAG2|RRAGC|RRAGB	http://amigo.geneontology.org/amigo/term/GO:0016241
interferon-gamma-mediated signaling pathway	Gene Ontology	GO:0060333	4	71	0.00012921	0.000594238	IRF2|IRF1|PRKCD|IRF4	http://amigo.geneontology.org/amigo/term/GO:0060333
positive regulation of protein dephosphorylation	Gene Ontology	GO:0035307	3	26	0.000131951	0.000603815	PINK1|DYNLL1|PRKCD	http://amigo.geneontology.org/amigo/term/GO:0035307
positive regulation of extrinsic apoptotic signaling pathway	Gene Ontology	GO:2001238	3	26	0.000131951	0.000603815	RIPK1|BID|TNFSF10	http://amigo.geneontology.org/amigo/term/GO:2001238
GTPase activity	Gene Ontology	GO:0003924	7	320	0.000136177	0.000620061	RRAGC|RRAGB|TUBB6|TUBB4B|TUBA1A|TUBB1|MFN1	http://amigo.geneontology.org/amigo/term/GO:0003924
positive regulation of protein ubiquitination	Gene Ontology	GO:0031398	4	72	0.000136031	0.000620061	PINK1|XIAP|BIRC3|BIRC2	http://amigo.geneontology.org/amigo/term/GO:0031398
positive regulation of translation	Gene Ontology	GO:0045727	4	73	0.000143108	0.000650008	PINK1|MAPK3|MAPK1|VIM	http://amigo.geneontology.org/amigo/term/GO:0045727
negative regulation of protein kinase activity	Gene Ontology	GO:0006469	4	75	0.000158056	0.00071613	AKT1|PRKAG2|CHP1|AKT1S1	http://amigo.geneontology.org/amigo/term/GO:0006469
regulation of cellular response to heat	Gene Ontology	GO:1900034	4	77	0.000174101	0.000786883	MAPK3|ATM|AKT1S1|MAPK1	http://amigo.geneontology.org/amigo/term/GO:1900034
regulation of transcription involved in G1/S transition of mitotic cell cycle	Gene Ontology	GO:0000083	3	29	0.00017778	0.000799575	E2F1|TFDP2|TFDP1	http://amigo.geneontology.org/amigo/term/GO:0000083
multivesicular body assembly	Gene Ontology	GO:0036258	3	29	0.00017778	0.000799575	CHMP2B|CHMP7|VPS37C	http://amigo.geneontology.org/amigo/term/GO:0036258
response to tumor necrosis factor	Gene Ontology	GO:0034612	3	30	0.000195072	0.000870944	RIPK1|CD14|CASP8	http://amigo.geneontology.org/amigo/term/GO:0034612
regulation of cytoskeleton organization	Gene Ontology	GO:0051493	3	30	0.000195072	0.000870944	MAPK3|MAPK1|CAPN2	http://amigo.geneontology.org/amigo/term/GO:0051493
ERK1 and ERK2 cascade	Gene Ontology	GO:0070371	3	30	0.000195072	0.000870944	YWHAZ|MAPK3|MAPK1	http://amigo.geneontology.org/amigo/term/GO:0070371
regulation of G2/M transition of mitotic cell cycle	Gene Ontology	GO:0010389	4	80	0.000200327	0.000892231	TUBB4B|TUBA1A|DYNLL1|DYNC1H1	http://amigo.geneontology.org/amigo/term/GO:0010389
response to exogenous dsRNA	Gene Ontology	GO:0043330	3	31	0.000213419	0.000948241	MAPK3|NFKBIA|MAPK1	http://amigo.geneontology.org/amigo/term/GO:0043330
negative regulation of insulin receptor signaling pathway	Gene Ontology	GO:0046627	3	32	0.000232847	0.00102813	IL1B|PRKCD|TSC1	http://amigo.geneontology.org/amigo/term/GO:0046627
positive regulation of TOR signaling	Gene Ontology	GO:0032008	3	32	0.000232847	0.00102813	LAMTOR4|RRAGC|RRAGB	http://amigo.geneontology.org/amigo/term/GO:0032008
cellular response to DNA damage stimulus	Gene Ontology	GO:0006974	6	248	0.000244746	0.00105178	PSME4|ATM|AKT1|XIAP|MAPK1|IKBKG	http://amigo.geneontology.org/amigo/term/GO:0006974
glutamatergic synapse	Gene Ontology	GO:0098978	7	354	0.000248957	0.00106737	YWHAZ|STAT3|CHMP2B|PRKAR1A|IL1RAP|PPP3CA|PPP3CB	http://amigo.geneontology.org/amigo/term/GO:0098978
response to interleukin-1	Gene Ontology	GO:0070555	3	33	0.000253384	0.00108382	IL1B|MYD88|PRKACA	http://amigo.geneontology.org/amigo/term/GO:0070555
protein phosphatase binding	Gene Ontology	GO:0019903	4	86	0.000261142	0.00111182	MTMR3|TRAF3|STAT3|PIK3R2	http://amigo.geneontology.org/amigo/term/GO:0019903
insulin receptor signaling pathway	Gene Ontology	GO:0008286	4	86	0.000261142	0.00111182	AKT1|AKT2|IGF1R|PIK3R2	http://amigo.geneontology.org/amigo/term/GO:0008286
positive regulation of telomere maintenance via telomerase	Gene Ontology	GO:0032212	3	34	0.000275057	0.00116566	MAPK3|ATM|MAPK1	http://amigo.geneontology.org/amigo/term/GO:0032212
GTPase binding	Gene Ontology	GO:0051020	3	34	0.000275057	0.00116566	ATG14|RRAGC|RRAGB	http://amigo.geneontology.org/amigo/term/GO:0051020
wound healing	Gene Ontology	GO:0042060	4	89	0.00029606	0.00125177	PPP3CA|PLEC|CFLAR|GSN	http://amigo.geneontology.org/amigo/term/GO:0042060
cellular response to nerve growth factor stimulus	Gene Ontology	GO:1990090	3	35	0.000297892	0.00125374	AKT1|E2F1|DYNC1LI2	http://amigo.geneontology.org/amigo/term/GO:1990090
positive regulation of interleukin-6 production	Gene Ontology	GO:0032755	4	90	0.000308408	0.00129503	IL1B|MYD88|STAT3|TLR4	http://amigo.geneontology.org/amigo/term/GO:0032755
positive regulation of protein kinase B signaling	Gene Ontology	GO:0051897	5	166	0.000309474	0.00129654	PINK1|PIK3CD|PIK3R5|IGF1R|PIK3R2	http://amigo.geneontology.org/amigo/term/GO:0051897
immune system process	Gene Ontology	GO:0002376	3	36	0.000321915	0.00132447	IRF2|IRF1|IRF4	http://amigo.geneontology.org/amigo/term/GO:0002376
regulation of cell population proliferation	Gene Ontology	GO:0042127	5	169	0.000335205	0.00137606	XIAP|BID|NFKBIA|STAT3|BIRC2	http://amigo.geneontology.org/amigo/term/GO:0042127
male gonad development	Gene Ontology	GO:0008584	4	93	0.000347667	0.00142087	BCL2L1|BCL2L11|TNFSF10|BOK	http://amigo.geneontology.org/amigo/term/GO:0008584
Wnt signaling pathway, calcium modulating pathway	Gene Ontology	GO:0007223	3	37	0.000347153	0.00142087	PPP3CA|PPP3CB|PPP3R1	http://amigo.geneontology.org/amigo/term/GO:0007223
ciliary basal body-plasma membrane docking	Gene Ontology	GO:0097711	4	95	0.000375747	0.00152882	TUBB4B|TUBA1A|DYNLL1|DYNC1H1	http://amigo.geneontology.org/amigo/term/GO:0097711
negative regulation of inflammatory response	Gene Ontology	GO:0050728	4	95	0.000375747	0.00152882	NFKB1|ELANE|PRKCD|TNFRSF1A	http://amigo.geneontology.org/amigo/term/GO:0050728
cellular response to insulin stimulus	Gene Ontology	GO:0032869	4	97	0.000405413	0.00160061	AKT1|AKT2|PIK3R2|CFLAR	http://amigo.geneontology.org/amigo/term/GO:0032869
cell projection organization	Gene Ontology	GO:0030030	3	39	0.000401372	0.00160061	AKT1|PAK2|TSC1	http://amigo.geneontology.org/amigo/term/GO:0030030
positive regulation of nitric oxide biosynthetic process	Gene Ontology	GO:0045429	3	39	0.000401372	0.00160061	AKT1|IL1B|TLR4	http://amigo.geneontology.org/amigo/term/GO:0045429
mitotic metaphase plate congression	Gene Ontology	GO:0007080	3	39	0.000401372	0.00160061	CHMP2B|KPNB1|CHMP7	http://amigo.geneontology.org/amigo/term/GO:0007080
negative regulation of G0 to G1 transition	Gene Ontology	GO:0070317	3	39	0.000401372	0.00160061	E2F1|TFDP2|TFDP1	http://amigo.geneontology.org/amigo/term/GO:0070317
ruffle	Gene Ontology	GO:0001726	4	98	0.000420856	0.00164663	MTMR14|DBNL|TLR4|GSN	http://amigo.geneontology.org/amigo/term/GO:0001726
antigen processing and presentation of exogenous peptide antigen via MHC class II	Gene Ontology	GO:0019886	4	98	0.000420856	0.00164663	DYNLL1|DYNC1LI1|DYNC1LI2|DYNC1H1	http://amigo.geneontology.org/amigo/term/GO:0019886
positive regulation of interleukin-10 production	Gene Ontology	GO:0032733	3	40	0.000430405	0.00167329	STAT3|TLR4|IRF4	http://amigo.geneontology.org/amigo/term/GO:0032733
activation of JUN kinase activity	Gene Ontology	GO:0007257	3	40	0.000430405	0.00167329	RIPK1|DBNL|MAP2K4	http://amigo.geneontology.org/amigo/term/GO:0007257
positive regulation of protein import into nucleus	Gene Ontology	GO:0042307	3	40	0.000430405	0.00167329	MAPK1|PIK3R2|PRKCD	http://amigo.geneontology.org/amigo/term/GO:0042307
mitotic spindle	Gene Ontology	GO:0072686	4	100	0.000452994	0.00175739	MAPK1|DYNLL1|TFDP2|IKBKG	http://amigo.geneontology.org/amigo/term/GO:0072686
mitotic spindle assembly	Gene Ontology	GO:0090307	3	41	0.000460752	0.00178371	BIRC5|KPNB1|XIAP	http://amigo.geneontology.org/amigo/term/GO:0090307
phosphorylation	Gene Ontology	GO:0016310	4	101	0.000469702	0.00181453	MAPK3|STAT3|PIK3CD|AKT1	http://amigo.geneontology.org/amigo/term/GO:0016310
protein stabilization	Gene Ontology	GO:0050821	5	183	0.000477308	0.00184004	PINK1|TSC1|CHP1|PRKCD|LAMP2	http://amigo.geneontology.org/amigo/term/GO:0050821
multivesicular body	Gene Ontology	GO:0005771	3	42	0.000492439	0.00189043	CHMP2B|CHMP7|PRKAR1A	http://amigo.geneontology.org/amigo/term/GO:0005771
phosphotyrosine residue binding	Gene Ontology	GO:0001784	3	42	0.000492439	0.00189043	MAPK3|MAPK1|PIK3R2	http://amigo.geneontology.org/amigo/term/GO:0001784
lamellipodium	Gene Ontology	GO:0030027	5	185	0.000500814	0.00190649	TSC1|DBNL|PAK2|TNFRSF25|GSN	http://amigo.geneontology.org/amigo/term/GO:0030027
protein targeting	Gene Ontology	GO:0006605	3	43	0.000525489	0.0019679	YWHAB|YWHAZ|LAMP2	http://amigo.geneontology.org/amigo/term/GO:0006605
endoplasmic reticulum to Golgi vesicle-mediated transport	Gene Ontology	GO:0006888	5	188	0.000537693	0.0020095	BCAP31|DYNLL1|DYNC1LI1|DYNC1LI2|DYNC1H1	http://amigo.geneontology.org/amigo/term/GO:0006888
axoneme	Gene Ontology	GO:0005930	4	105	0.000540943	0.00201754	MAP1LC3B|ATG14|ATG7|PRKAR1A	http://amigo.geneontology.org/amigo/term/GO:0005930
cytoskeleton	Gene Ontology	GO:0005856	7	406	0.000556267	0.00207049	TUBB4B|CASP8|VIM|MAPK3|MAPK1|TRADD|PINK1	http://amigo.geneontology.org/amigo/term/GO:0005856
protein K63-linked ubiquitination	Gene Ontology	GO:0070534	3	44	0.000559926	0.00207568	TRAF1|TRAF3|UBE2V1	http://amigo.geneontology.org/amigo/term/GO:0070534
response to cytokine	Gene Ontology	GO:0034097	3	44	0.000559926	0.00207568	BCL2L1|PPP3CB|MCL1	http://amigo.geneontology.org/amigo/term/GO:0034097
negative regulation of I-kappaB kinase/NF-kappaB signaling	Gene Ontology	GO:0043124	3	45	0.000595774	0.00220412	RIPK1|CARD8|CASP8	http://amigo.geneontology.org/amigo/term/GO:0043124
cellular response to glucose starvation	Gene Ontology	GO:0042149	3	48	0.000712013	0.00257701	MTMR3|PRKAG2|ATG14	http://amigo.geneontology.org/amigo/term/GO:0042149
positive regulation of cell adhesion	Gene Ontology	GO:0045785	3	48	0.000712013	0.00257701	PPP3CA|ATM|PRKACA	http://amigo.geneontology.org/amigo/term/GO:0045785
intermediate filament cytoskeleton	Gene Ontology	GO:0045111	3	49	0.000753734	0.00263951	PLEC|PAK2|VIM	http://amigo.geneontology.org/amigo/term/GO:0045111
phosphatase binding	Gene Ontology	GO:0019902	3	49	0.000753734	0.00263951	MAPK3|MAPK1|PPP3R1	http://amigo.geneontology.org/amigo/term/GO:0019902
positive regulation of tumor necrosis factor production	Gene Ontology	GO:0032760	3	50	0.000796979	0.00278033	RIPK1|CD14|TLR4	http://amigo.geneontology.org/amigo/term/GO:0032760
negative regulation of autophagy	Gene Ontology	GO:0010507	3	50	0.000796979	0.00278033	AKT1|STAT3|MCL1	http://amigo.geneontology.org/amigo/term/GO:0010507
endoplasmic reticulum	Gene Ontology	GO:0005783	11	1018	0.000816735	0.00284385	BCL2L1|BCAP31|CASP4|BNIP3L|PSMF1|CHP1|PRKCD|BOK|PRKACA|CAPN2|PINK1	http://amigo.geneontology.org/amigo/term/GO:0005783
receptor complex	Gene Ontology	GO:0043235	5	207	0.000820707	0.00285227	RIPK1|IGF1R|TRADD|TLR4|TNFRSF1A	http://amigo.geneontology.org/amigo/term/GO:0043235
enzyme activator activity	Gene Ontology	GO:0008047	3	52	0.000888129	0.00306338	CFLAR|DBNL|PRKCD	http://amigo.geneontology.org/amigo/term/GO:0008047
late endosome membrane	Gene Ontology	GO:0031902	4	121	0.000903698	0.00311123	CHMP2B|ATG9A|VPS37C|LAMP2	http://amigo.geneontology.org/amigo/term/GO:0031902
signaling receptor activity	Gene Ontology	GO:0038023	5	214	0.000948834	0.00325441	CSF2RB|FAS|TNFRSF25|TLR4|TNFRSF10B	http://amigo.geneontology.org/amigo/term/GO:0038023
intracellular anatomical structure	Gene Ontology	GO:0005622	4	123	0.000958653	0.00328196	CHMP2B|MAP1LC3B|IKBKG|GABARAPL2	http://amigo.geneontology.org/amigo/term/GO:0005622
cell surface	Gene Ontology	GO:0009986	8	598	0.00114986	0.00387156	ELANE|TNFRSF1A|FAS|TNFRSF10C|TNFRSF10B|CD14|TLR4|TNFRSF10D	http://amigo.geneontology.org/amigo/term/GO:0009986
positive regulation of smooth muscle cell proliferation	Gene Ontology	GO:0048661	3	58	0.00120038	0.003976	AKT1|ELANE|IRAK4	http://amigo.geneontology.org/amigo/term/GO:0048661
DNA-binding transcription activator activity, RNA polymerase II-specific	Gene Ontology	GO:0001228	7	466	0.00122393	0.00404669	IRF2|IRF1|STAT3|IRF4|NFKB1|TFDP2|TFDP1	http://amigo.geneontology.org/amigo/term/GO:0001228
G2/M transition of mitotic cell cycle	Gene Ontology	GO:0000086	4	133	0.00126913	0.00418105	TUBB4B|TUBA1A|DYNLL1|DYNC1H1	http://amigo.geneontology.org/amigo/term/GO:0000086
nuclear chromatin	Gene Ontology	GO:0000790	10	915	0.00129718	0.00426581	IRF2|IRF1|STAT3|E2F1|IRF4|DFFB|SATB1|NFKB1|TFDP2|TFDP1	http://amigo.geneontology.org/amigo/term/GO:0000790
brain development	Gene Ontology	GO:0007420	5	231	0.00132151	0.00433806	ATM|PPP3CA|BCL2L11|BOK|CASP2	http://amigo.geneontology.org/amigo/term/GO:0007420
Fc-gamma receptor signaling pathway involved in phagocytosis	Gene Ontology	GO:0038096	4	135	0.00133873	0.00434022	MAPK3|MAPK1|PIK3R2|PRKCD	http://amigo.geneontology.org/amigo/term/GO:0038096
ficolin-1-rich granule membrane	Gene Ontology	GO:0101003	3	61	0.00137934	0.00446401	DYNLL1|DYNC1LI1|LAMP2	http://amigo.geneontology.org/amigo/term/GO:0101003
protein serine/threonine phosphatase activity	Gene Ontology	GO:0004722	3	62	0.00144251	0.00464387	PPP3CA|PPP3CB|MTMR3	http://amigo.geneontology.org/amigo/term/GO:0004722
specific granule lumen	Gene Ontology	GO:0035580	3	62	0.00144251	0.00464387	NFKB1|ELANE|KPNB1	http://amigo.geneontology.org/amigo/term/GO:0035580
positive regulation of interferon-gamma production	Gene Ontology	GO:0032729	3	63	0.00150747	0.00480741	IL1B|CD14|TLR4	http://amigo.geneontology.org/amigo/term/GO:0032729
regulation of translation	Gene Ontology	GO:0006417	3	63	0.00150747	0.00480741	AKT1|AKT2|TSC1	http://amigo.geneontology.org/amigo/term/GO:0006417
protein dimerization activity	Gene Ontology	GO:0046983	4	140	0.00152432	0.00483932	PPP3CA|PPP3CB|STAT3|E2F1	http://amigo.geneontology.org/amigo/term/GO:0046983
protein ubiquitination	Gene Ontology	GO:0016567	7	486	0.00154967	0.00491129	RPS27A|BIRC3|AKT1|XIAP|UBC|PINK1|OPA1	http://amigo.geneontology.org/amigo/term/GO:0016567
cell cortex	Gene Ontology	GO:0005938	4	142	0.00160333	0.00506387	AKT2|TSC1|DBNL|DYNC1H1	http://amigo.geneontology.org/amigo/term/GO:0005938
cell population proliferation	Gene Ontology	GO:0008283	4	142	0.00160333	0.00506387	BCL2L1|AKT1|STAT3|IRF2	http://amigo.geneontology.org/amigo/term/GO:0008283
cell cycle	Gene Ontology	GO:0007049	5	245	0.00170169	0.00528358	MAPK3|MAPK1|DYNC1LI1|PAK2|PRKCD	http://amigo.geneontology.org/amigo/term/GO:0007049
extracellular matrix disassembly	Gene Ontology	GO:0022617	3	66	0.00171324	0.00531048	ELANE|CAPN2|GSN	http://amigo.geneontology.org/amigo/term/GO:0022617
cellular response to drug	Gene Ontology	GO:0035690	3	67	0.00178553	0.00552522	PPP3CA|IL1B|PPP3CB	http://amigo.geneontology.org/amigo/term/GO:0035690
postsynaptic density	Gene Ontology	GO:0014069	5	251	0.00188703	0.00575826	CHMP2B|DBNL|MAPK1|STAT3|TSC1	http://amigo.geneontology.org/amigo/term/GO:0014069
protein dephosphorylation	Gene Ontology	GO:0006470	4	149	0.00190229	0.0057793	PPP3CA|PPP3CB|MTMR3|PPP3R1	http://amigo.geneontology.org/amigo/term/GO:0006470
microtubule binding	Gene Ontology	GO:0008017	5	252	0.0019193	0.00582135	BCL2L11|BIRC5|MAP1LC3B|CHP1|GABARAPL2	http://amigo.geneontology.org/amigo/term/GO:0008017
regulation of insulin secretion	Gene Ontology	GO:0050796	3	71	0.00209365	0.00628995	IL1B|PRKACA|PPP3CB	http://amigo.geneontology.org/amigo/term/GO:0050796
negative regulation of transcription by RNA polymerase II	Gene Ontology	GO:0000122	9	832	0.00241609	0.00716241	IRF2|ELANE|STAT3|E2F1|RPS27A|NFKB1|SATB1|UBC|UBE2V1	http://amigo.geneontology.org/amigo/term/GO:0000122
response to endoplasmic reticulum stress	Gene Ontology	GO:0034976	3	75	0.00243289	0.00720058	TNFRSF10B|BCL2L11|PIK3R2	http://amigo.geneontology.org/amigo/term/GO:0034976
response to hypoxia	Gene Ontology	GO:0001666	4	160	0.00244678	0.0072184	ATM|FUNDC1|CAPN2|BIRC2	http://amigo.geneontology.org/amigo/term/GO:0001666
early endosome	Gene Ontology	GO:0005769	5	267	0.00245328	0.00722594	MAPK3|AKT2|MAPK1|DBNL|TLR4	http://amigo.geneontology.org/amigo/term/GO:0005769
Golgi apparatus	Gene Ontology	GO:0005794	10	1002	0.00249828	0.00734671	GABARAPL2|DAPK2|MAPK3|CD14|BOK|CAPN2|TLR4|MAPK1|NFKBIE|PLIN3	http://amigo.geneontology.org/amigo/term/GO:0005794
caveola	Gene Ontology	GO:0005901	3	76	0.00252269	0.00739576	MAPK3|MAPK1|DYNLL1	http://amigo.geneontology.org/amigo/term/GO:0005901
neural tube closure	Gene Ontology	GO:0001843	3	78	0.00270837	0.00787617	TSC1|DYNLL1|OPA1	http://amigo.geneontology.org/amigo/term/GO:0001843
microtubule-based movement	Gene Ontology	GO:0007018	3	81	0.00300235	0.00859266	DYNC1LI1|DYNC1LI2|DYNC1H1	http://amigo.geneontology.org/amigo/term/GO:0007018
response to toxic substance	Gene Ontology	GO:0009636	3	82	0.00310452	0.00881857	MAPK3|MAPK1|CHUK	http://amigo.geneontology.org/amigo/term/GO:0009636
vesicle	Gene Ontology	GO:0031982	4	173	0.00321811	0.0091271	YWHAZ|AKT1|RPS27A|UBC	http://amigo.geneontology.org/amigo/term/GO:0031982
DNA-binding transcription factor activity, RNA polymerase II-specific	Gene Ontology	GO:0000981	9	874	0.00333341	0.00938162	IRF2|IRF1|STAT3|E2F1|IRF4|SATB1|NFKB1|TFDP2|TFDP1	http://amigo.geneontology.org/amigo/term/GO:0000981
positive regulation of phosphatidylinositol 3-kinase signaling	Gene Ontology	GO:0014068	3	86	0.00353448	0.00985926	PIK3R5|PIK3CD|IGF1R	http://amigo.geneontology.org/amigo/term/GO:0014068
kinetochore	Gene Ontology	GO:0000776	3	87	0.00364735	0.0101407	DYNLL1|DYNC1LI1|DYNC1LI2	http://amigo.geneontology.org/amigo/term/GO:0000776
nuclear envelope	Gene Ontology	GO:0005635	4	182	0.00383989	0.0106278	BNIP3L|MAPK3|KPNB1|CHMP7	http://amigo.geneontology.org/amigo/term/GO:0005635
heart development	Gene Ontology	GO:0007507	4	189	0.00437637	0.0119801	PPP3CB|ATM|TFDP2|OPA1	http://amigo.geneontology.org/amigo/term/GO:0007507
lipid droplet	Gene Ontology	GO:0005811	3	93	0.00437082	0.0119801	BCAP31|PLIN3|TSC1	http://amigo.geneontology.org/amigo/term/GO:0005811
axon	Gene Ontology	GO:0030424	5	310	0.00457662	0.0124416	PINK1|IGF1R|MAPK1|ATG7|MAP2K4	http://amigo.geneontology.org/amigo/term/GO:0030424
regulation of cell migration	Gene Ontology	GO:0030334	3	97	0.00489805	0.0130639	AKT1|AKT2|PRKX	http://amigo.geneontology.org/amigo/term/GO:0030334
positive regulation of cold-induced thermogenesis	Gene Ontology	GO:0120162	3	97	0.00489805	0.0130639	IGF1R|IRF4|DYNC1H1	http://amigo.geneontology.org/amigo/term/GO:0120162
sarcolemma	Gene Ontology	GO:0042383	3	97	0.00489805	0.0130639	PPP3CA|PLEC|PPP3R1	http://amigo.geneontology.org/amigo/term/GO:0042383
cellular protein metabolic process	Gene Ontology	GO:0044267	4	198	0.00513752	0.0136431	CSF2RB|UBC|RPS27A|GSN	http://amigo.geneontology.org/amigo/term/GO:0044267
RNA polymerase II transcription regulatory region sequence-specific DNA binding	Gene Ontology	GO:0000977	5	327	0.00569675	0.0148911	IRF2|SATB1|TFDP2|TFDP1|NFKB1	http://amigo.geneontology.org/amigo/term/GO:0000977
chaperone binding	Gene Ontology	GO:0051087	3	104	0.00590965	0.0153819	BIRC5|BIRC2|TSC1	http://amigo.geneontology.org/amigo/term/GO:0051087
response to virus	Gene Ontology	GO:0009615	3	104	0.00590965	0.0153819	IKBKB|CHUK|IKBKG	http://amigo.geneontology.org/amigo/term/GO:0009615
protein N-terminus binding	Gene Ontology	GO:0047485	3	104	0.00590965	0.0153819	ATM|BIRC2|TSC1	http://amigo.geneontology.org/amigo/term/GO:0047485
positive regulation of ERK1 and ERK2 cascade	Gene Ontology	GO:0070374	4	207	0.00598273	0.0154743	MAPK3|PRKACA|TLR4|CFLAR	http://amigo.geneontology.org/amigo/term/GO:0070374
negative regulation of gene expression	Gene Ontology	GO:0010629	4	210	0.00628382	0.0161496	PINK1|AKT1|PIK3CD|NFKB1	http://amigo.geneontology.org/amigo/term/GO:0010629
ubiquitin ligase complex	Gene Ontology	GO:0000151	3	107	0.00637856	0.0163245	UBE2V1|IKBKG|OPA1	http://amigo.geneontology.org/amigo/term/GO:0000151
nuclear matrix	Gene Ontology	GO:0016363	3	109	0.00670315	0.0170847	PRKCD|SATB1|VIM	http://amigo.geneontology.org/amigo/term/GO:0016363
cell division	Gene Ontology	GO:0051301	5	346	0.00716348	0.0181812	BIRC5|TUBA1A|DYNC1LI1|PAK2|DYNC1H1	http://amigo.geneontology.org/amigo/term/GO:0051301
histone deacetylase binding	Gene Ontology	GO:0042826	3	114	0.00755708	0.0190223	YWHAB|UBE2V1|PAK2	http://amigo.geneontology.org/amigo/term/GO:0042826
axon guidance	Gene Ontology	GO:0007411	4	222	0.0075886	0.0190754	MAPK3|MAPK1|PRKACA|PIK3CD	http://amigo.geneontology.org/amigo/term/GO:0007411
glucose homeostasis	Gene Ontology	GO:0042593	3	115	0.0077352	0.0193908	AKT1|IGF1R|STAT3	http://amigo.geneontology.org/amigo/term/GO:0042593
positive regulation of cell population proliferation	Gene Ontology	GO:0008284	6	501	0.00796329	0.0198541	BCL2L1|IGF1R|BIRC5|AKT1|AKT2|IL1B	http://amigo.geneontology.org/amigo/term/GO:0008284
extracellular space	Gene Ontology	GO:0005615	12	1572	0.00799401	0.0199037	YWHAZ|ELANE|PRKAG2|E2F1|TNFRSF1A|RPS27A|CD14|LAMP2|UBC|IL1B|IRAK4|GSN	http://amigo.geneontology.org/amigo/term/GO:0005615
ubiquitin-protein transferase activity	Gene Ontology	GO:0004842	4	233	0.00893115	0.0219982	XIAP|TRAF3|BIRC3|BIRC2	http://amigo.geneontology.org/amigo/term/GO:0004842
chromatin	Gene Ontology	GO:0000785	3	124	0.00945024	0.0231481	PINK1|CHMP7|CAPN2	http://amigo.geneontology.org/amigo/term/GO:0000785
negative regulation of transcription, DNA-templated	Gene Ontology	GO:0045892	6	536	0.0108263	0.0262434	IRF1|E2F1|BIRC5|YWHAB|UBE2V1|TFDP2	http://amigo.geneontology.org/amigo/term/GO:0045892
positive regulation of angiogenesis	Gene Ontology	GO:0045766	3	131	0.0109255	0.0264141	PRKACA|IL1B|STAT3	http://amigo.geneontology.org/amigo/term/GO:0045766
regulation of signal transduction by p53 class mediator	Gene Ontology	GO:1901796	3	131	0.0109255	0.0264141	PRKAG2|AKT1|ATM	http://amigo.geneontology.org/amigo/term/GO:1901796
negative regulation of cell population proliferation	Gene Ontology	GO:0008285	5	394	0.012005	0.0288718	DYNLL1|IL1B|STAT3|IRF1|TSC1	http://amigo.geneontology.org/amigo/term/GO:0008285
negative regulation of neuron apoptotic process	Gene Ontology	GO:0043524	3	138	0.0125267	0.0300476	BCL2L1|PINK1|BOK	http://amigo.geneontology.org/amigo/term/GO:0043524
regulation of small GTPase mediated signal transduction	Gene Ontology	GO:0051056	3	139	0.0127658	0.0305812	DYNLL1|PIK3R2|TNFRSF25	http://amigo.geneontology.org/amigo/term/GO:0051056
spermatogenesis	Gene Ontology	GO:0007283	5	404	0.0132381	0.0316302	BCL2L1|BCAP31|BCL2L11|BIRC3|E2F1	http://amigo.geneontology.org/amigo/term/GO:0007283
transmembrane signaling receptor activity	Gene Ontology	GO:0004888	3	146	0.0145127	0.0345406	TNFRSF10C|TLR4|TNFRSF10D	http://amigo.geneontology.org/amigo/term/GO:0004888
regulation of transcription by RNA polymerase II	Gene Ontology	GO:0006357	7	751	0.0153323	0.0362561	STAT3|PRKAR1A|SATB1|OPA1|TFDP2|TFDP1|PRF1	http://amigo.geneontology.org/amigo/term/GO:0006357
protein localization to plasma membrane	Gene Ontology	GO:0072659	3	152	0.0161126	0.0380034	IKBKB|AKT2|TNFRSF1A	http://amigo.geneontology.org/amigo/term/GO:0072659
perikaryon	Gene Ontology	GO:0043204	3	155	0.0169483	0.0396179	MAPK1|DBNL|MAP2K4	http://amigo.geneontology.org/amigo/term/GO:0043204
cytoplasmic vesicle	Gene Ontology	GO:0031410	4	285	0.0173502	0.0405059	ATM|MAP1LC3B|DAPK2|GABARAPL2	http://amigo.geneontology.org/amigo/term/GO:0031410
ubiquitin protein ligase activity	Gene Ontology	GO:0061630	4	286	0.0175477	0.0409149	XIAP|BIRC3|BIRC2|OPA1	http://amigo.geneontology.org/amigo/term/GO:0061630
microtubule cytoskeleton	Gene Ontology	GO:0015630	3	158	0.0178078	0.0414687	AKT1|TUBA1A|CHP1	http://amigo.geneontology.org/amigo/term/GO:0015630
RNA splicing	Gene Ontology	GO:0008380	3	160	0.0183941	0.0427798	UBE2V1|RRAGC|SCAF11	http://amigo.geneontology.org/amigo/term/GO:0008380
DNA-binding transcription factor activity	Gene Ontology	GO:0003700	6	607	0.0187474	0.0434363	IRF2|STAT3|E2F1|IRF4|NFKB1|TFDP1	http://amigo.geneontology.org/amigo/term/GO:0003700
endosome	Gene Ontology	GO:0005768	4	293	0.0189697	0.0436559	CHMP2B|ATG9A|TRAF3|PLIN3	http://amigo.geneontology.org/amigo/term/GO:0005768
nuclear body	Gene Ontology	GO:0016604	4	307	0.0220231	0.047266	FAS|SATB1|PAK2|SCAF11	http://amigo.geneontology.org/amigo/term/GO:0016604
zinc ion binding	Gene Ontology	GO:0008270	7	820	0.023392	0.0474973	TRAF1|TNFSF10|MAP3K1|BIRC2|TRAF3|PRKACA|KPNB1	http://amigo.geneontology.org/amigo/term/GO:0008270
translation	Gene Ontology	GO:0006412	3	173	0.0224652	0.0474973	AKT1|RPS27A|UBC	http://amigo.geneontology.org/amigo/term/GO:0006412
blood coagulation	Gene Ontology	GO:0007596	3	173	0.0224652	0.0474973	IRF2|IRF1|PRKAR1A	http://amigo.geneontology.org/amigo/term/GO:0007596
