# Supplementary material for: Utilizing bioinformatics to identify biomarkers and analyze their expression in relation to immune cell ratios in femoral head necrosis
Source: Front Physiol. 2025 Apr 16;16:1373721. doi: 10.3389/fphys.2025.1373721 (PMC12040900; doi:10.3389/fphys.2025.1373721)
Supplement: Supplementary file 12 [file Table8.xlsx]

## Sheet: string_interactions_short (1)
#node1	node2	combined_score
BCL2L1	TNFRSF25	0.4
IGF1R	IL1B	0.4
IRF4	PRF1	0.4
AKT1	ELANE	0.401
CD14	TNFRSF1B	0.401
PRF1	XIAP	0.401
TUBB4B	TUBB6	0.401
AKT1	PRF1	0.402
UBE2V1	XIAP	0.402
ATM	CFLAR	0.403
IRF1	TNFRSF1A	0.403
AKT1	CAPN2	0.404
ATM	TNFRSF10B	0.404
BCL2L11	E2F1	0.404
CASP8	IRAK4	0.404
CRADD	IRAK4	0.404
FAS	MYD88	0.404
AKT1	CSF2RB	0.405
BCL2L11	IKBKB	0.405
MCL1	RIPK1	0.405
PPP3CA	PRKAR1A	0.405
BCL2L1	DYNLL1	0.406
CASP2	IL1B	0.406
CASP5	SCAF11	0.406
NFKBIE	TNFRSF1A	0.406
CSF2RB	IL1B	0.407
KPNB1	RPS27A	0.407
CASP4	TNFRSF10B	0.408
CASP8	MAP2K4	0.409
BCL2L11	RIPK1	0.41
IRF1	PRF1	0.41
PPP3R1	TRAF3	0.41
RIPK1	STAT3	0.41
ATG14	FUNDC1	0.411
ATG7	MYD88	0.411
FAS	TRAF1	0.411
IL1B	MCL1	0.411
MAP1LC3B	WDR45	0.411
ATG7	STAT3	0.412
BCL2L11	CASP1	0.412
CASP1	TRAF3	0.412
CFLAR	MYD88	0.412
DYNLL1	PSMB3	0.412
PIK3R2	STAT3	0.412
ATG7	TLR4	0.413
ATM	BIRC2	0.413
IRAK4	TRADD	0.413
CFLAR	MAPK3	0.414
DFFB	FAS	0.414
IKBKB	MCL1	0.414
IRF2	TNFRSF1A	0.414
AKT2	BCL2L11	0.415
ATG7	DAPK1	0.415
MAP1LC3B	STAT3	0.415
MAP1LC3B	RPS27A	0.415
MAP3K14	YWHAB	0.415
AKT1	TUBA1A	0.416
AKT2	PSMD9	0.416
BCL2L11	IL1B	0.416
CASP1	TNFRSF10B	0.416
CHMP2B	LAMP2	0.416
DAPK1	GABARAPL2	0.416
MAPK3	PPP3CB	0.416
PPP3CB	PRKX	0.416
WDR45	WIPI2	0.416
ATG14	DAPK1	0.417
ATG7	CASP2	0.417
MAPK3	PPP3R1	0.417
BNIP3L	LAMP2	0.418
MAPK3	TNFRSF10B	0.418
MYD88	TNFSF10	0.418
MYD88	NFKBIE	0.418
TNFRSF1A	TNFRSF25	0.418
GSN	PLEC	0.419
NFKB1	XIAP	0.419
BIRC2	CASP5	0.42
CASP4	MYD88	0.42
DFFB	XIAP	0.421
MAP2K4	MAPK1	0.421
BIRC2	STAT3	0.422
BIRC3	CARD8	0.422
BIRC5	CFLAR	0.422
DFFB	TRADD	0.422
E2F1	PIK3R5	0.422
CASP5	XIAP	0.423
RIPK1	TNFRSF10D	0.423
AKT1	IRF1	0.424
IL1RAP	TUBB6	0.424
MYD88	PPP3CA	0.424
AKT2	VIM	0.426
ATG7	MCL1	0.426
DAPK1	TNFRSF25	0.426
IL1B	MAPK1	0.426
IRF4	TNFRSF1A	0.426
CHUK	PRKCD	0.427
DAPK1	TNFRSF1A	0.427
IL1RAP	STAT3	0.427
CFLAR	DFFB	0.428
FAS	NFKBIA	0.428
ATM	MAPK1	0.429
ATM	PIK3CD	0.429
BCL2L1	GABARAPL2	0.429
CASP2	MAP2K4	0.43
CASP8	IGF1R	0.43
PRKAR1A	YWHAZ	0.43
TRAF3	XIAP	0.43
TUBA1A	UBC	0.43
BCL2L11	PPP3R1	0.431
BOK	CFLAR	0.431
BIRC2	IRAK4	0.433
IKBKB	PRKCD	0.434
PRKCD	TNFRSF1A	0.434
CASP5	CASP8	0.435
CSF2RB	TNFRSF1B	0.435
TLR4	TRAF1	0.435
CFLAR	TLR4	0.437
MCL1	TNFRSF10C	0.437
IL1B	TNFRSF10B	0.438
MAP1LC3B	MCL1	0.438
NFKBIA	TNFSF10	0.438
IKBKB	IRF1	0.439
BCL2L11	CASP4	0.44
CASP1	CRADD	0.44
CHUK	IRF1	0.441
ATM	NFKBIA	0.445
ATM	IRF1	0.445
NFKBIE	TRAF3	0.445
CASP1	MAP1LC3B	0.446
CFLAR	CRADD	0.446
GSN	XIAP	0.447
BCAP31	MFN1	0.449
CASP1	CSF2RB	0.449
CASP4	MCL1	0.449
CASP1	DFFB	0.45
FAS	TRAF3	0.45
CASP1	NFKB1	0.451
CASP8	IRF1	0.451
MYD88	YWHAB	0.451
BIRC3	CASP5	0.452
ATG7	IRF1	0.453
ATM	PSME4	0.453
MAP2K4	NFKBIA	0.453
NFKBIA	TNFRSF1B	0.453
ATG9A	CHP1	0.454
MAP3K14	PPP3CB	0.454
CFLAR	TNFRSF25	0.455
BCL2L11	TRADD	0.456
CASP8	GSN	0.456
BCL2L1	NFKB1	0.457
CASP1	SCAF11	0.457
CASP2	PLEC	0.457
IRAK4	STAT3	0.457
BCL2L1	DAPK1	0.458
CASP4	TNFSF10	0.458
ATG7	CASP1	0.459
ATM	BCL2L11	0.459
BCL2L11	NFKBIA	0.459
BCL2L11	BNIP3L	0.459
CASP1	IKBKG	0.459
CASP8	DAPK1	0.459
DYNLL1	TUBB4B	0.46
BCL2L1	TNFRSF10D	0.461
MAP3K1	UBE2V1	0.461
PIK3R5	PRF1	0.461
IRF1	TNFSF10	0.462
MAPK3	PPP3CA	0.462
MCL1	TRAF3	0.463
STAT3	TNFSF10	0.463
NFKBIA	PPP3CA	0.464
ATM	CHUK	0.465
NFKB1	VIM	0.465
TRAF3	UBE2V1	0.466
AKT1S1	IGF1R	0.467
ATM	IGF1R	0.467
IGF1R	XIAP	0.467
FAS	TLR4	0.468
NFKBIA	YWHAZ	0.468
PRF1	TNFRSF1A	0.468
BCL2L11	IGF1R	0.469
CASP8	PRKCD	0.469
PRKCD	YWHAB	0.469
BCL2L1	RIPK1	0.47
BCL2L1	TLR4	0.47
CASP5	MYD88	0.47
IGF1R	MCL1	0.47
IKBKG	STAT3	0.47
BNIP3L	MCL1	0.471
CASP8	NLRP1	0.471
CFLAR	IRF4	0.471
ATG7	FUNDC1	0.472
BCL2L1	MYD88	0.472
NFKBIA	TNFRSF10B	0.472
ATM	DAPK1	0.473
ATG7	CHMP2B	0.474
BCL2L1	TNFRSF10C	0.474
BIRC2	IL1B	0.474
MYD88	PRF1	0.474
IL1B	XIAP	0.475
ATG9A	LAMP2	0.477
FAS	STAT3	0.478
IL1B	PRKCD	0.478
TNFRSF1B	TNFRSF25	0.478
ATG4D	WDR45	0.479
ATG7	IL1B	0.479
ATM	MAP3K1	0.48
LAMP2	PINK1	0.48
MYD88	PIK3R2	0.481
IRF1	TRAF3	0.482
AKT1	TRADD	0.483
BIRC2	CASP4	0.483
NFKBIE	RIPK1	0.483
AKT1	TRAF1	0.484
CASP1	PRF1	0.484
STAT3	TNFRSF10B	0.484
AKT2	ATM	0.485
IL1B	TRADD	0.485
MAPK1	PPP3CB	0.485
CASP1	MCL1	0.486
TNFRSF1B	TNFSF10	0.486
ATG7	MFN1	0.487
PLEC	PRKAG2	0.487
BCAP31	CASP1	0.488
CASP1	MAPK3	0.49
AKT2	XIAP	0.491
ATG7	RIPK1	0.491
IL1B	MAP1LC3B	0.491
BOK	CASP8	0.492
CASP8	PRF1	0.492
MYD88	TRAF1	0.492
PRF1	TNFRSF10B	0.493
CASP8	TNFRSF1B	0.494
NLRP1	XIAP	0.494
TNFRSF10B	TNFRSF1B	0.494
BIRC5	CASP8	0.497
TNFRSF10C	TNFRSF25	0.497
TNFRSF10D	TNFRSF25	0.497
BIRC3	STAT3	0.498
CFLAR	MAP2K4	0.498
E2F1	NFKB1	0.498
IRF4	SATB1	0.498
ATM	XIAP	0.499
BCL2L1	PRKCD	0.499
BIRC3	NFKBIE	0.499
CSF2RB	PIK3R2	0.499
PLIN3	UBC	0.499
AKT1	BIRC5	0.5
ATG4D	CASP8	0.5
PLEC	UBC	0.501
TLR4	TNFRSF1B	0.501
CASP1	ELANE	0.503
CHUK	TNFRSF1B	0.503
MAPK1	PPP3R1	0.503
AKT1	ATG14	0.504
PINK1	WIPI2	0.504
VIM	YWHAB	0.504
IGF1R	TSC1	0.505
MAP1LC3B	MAPK3	0.506
PPP3CB	PRKAR1A	0.506
BCL2L11	TNFRSF1A	0.507
MYD88	NLRP1	0.509
ATM	MAPK3	0.51
ATM	STAT3	0.51
AKT1	UBC	0.511
CASP4	TLR4	0.511
TLR4	YWHAB	0.511
TNFRSF10D	TNFRSF1A	0.511
BOK	CASP2	0.512
IRF4	TLR4	0.512
PRF1	STAT3	0.512
FAS	TNFRSF1B	0.513
CASP1	CHUK	0.514
MAP3K14	NFKB1	0.514
CASP2	TNFRSF10B	0.516
BCL2L1	DFFB	0.517
MAP2K4	PRKAR1A	0.517
PPP3CA	PRKX	0.517
TNFRSF10C	TNFRSF1A	0.517
AKT1	PPP3CA	0.518
BCL2L1	IKBKG	0.518
BIRC3	IL1B	0.518
CFLAR	STAT3	0.518
CHP1	PPP3CB	0.518
AKT2	STAT3	0.519
CASP2	FAS	0.519
ATM	BIRC3	0.52
PLIN3	RPS27A	0.52
BCL2L1	CASP4	0.521
GABARAPL2	MFN1	0.521
IRAK4	NFKB1	0.522
MCL1	MFN1	0.522
BCL2L11	CASP2	0.523
ATM	MCL1	0.524
CARD8	CASP2	0.524
MAP3K14	NFKBIE	0.524
NFKB1	TRAF3	0.524
AKT1	TRAF3	0.526
BIRC5	MCL1	0.526
CASP1	TRADD	0.526
IL1B	IRF4	0.527
PSMB3	TUBB4B	0.527
TLR4	TNFSF10	0.527
AKT1	RPS27A	0.528
BCL2L11	BIRC2	0.528
CARD8	IL1B	0.529
MAPK3	XIAP	0.529
AKT1	LAMP2	0.531
ATG14	BNIP3L	0.531
BID	CFLAR	0.531
AKT1	GABARAPL2	0.533
CASP1	STAT3	0.534
BCL2L11	BIRC3	0.536
BID	XIAP	0.536
CFLAR	TRAF3	0.537
IRF1	PSMB10	0.537
MAPK1	PPP3CA	0.537
GABARAPL2	WDR45	0.538
CASP8	TRAF3	0.539
KPNB1	MAP1LC3B	0.539
AKT1	CASP2	0.54
BIRC2	MYD88	0.54
MYD88	PIK3CD	0.541
TNFRSF10B	TNFRSF1A	0.541
TNFRSF10D	TRADD	0.541
ATG14	PINK1	0.542
IL1B	NFKBIE	0.542
CASP1	IL1RAP	0.543
BCL2L1	IGF1R	0.544
BNIP3L	CASP8	0.546
TLR4	TRADD	0.546
BCL2L1	BIRC5	0.547
BIRC5	E2F1	0.547
AKT1	FAS	0.548
CSF2RB	PIK3CD	0.548
BCL2L1	MAP1LC3B	0.549
ATG7	CASP8	0.55
MAPK3	TNFRSF1A	0.55
CASP4	CASP8	0.552
IL1B	TNFSF10	0.552
CASP1	TNFRSF1B	0.553
PPP3CB	TRAF3	0.553
FAS	TNFRSF10C	0.554
LAMP2	RRAGC	0.554
AKT1	TNFSF10	0.556
BCL2L11	TNFSF10	0.556
CHP1	PPP3CA	0.556
DYNC1LI1	IKBKG	0.556
BCL2L1	CHUK	0.557
CASP1	IKBKB	0.558
AKT1S1	MAPK3	0.56
MCL1	TNFRSF1A	0.56
BIRC2	TNFSF10	0.561
FAS	IL1B	0.562
TNFRSF10C	XIAP	0.563
BIRC3	CASP4	0.565
NFKBIE	TRAF1	0.565
BCL2L11	FAS	0.566
BNIP3L	MFN1	0.566
TNFRSF10D	XIAP	0.566
IRF2	NFKB1	0.567
ATG14	PIK3R2	0.568
ATM	BCL2L1	0.569
BCL2L1	TRAF1	0.569
PPP3CA	TRAF3	0.569
CFLAR	TNFRSF1B	0.57
IL1B	TRAF3	0.57
CASP1	IRAK4	0.571
IL1B	TRAF1	0.571
CASP5	TLR4	0.572
PINK1	TRAF3	0.573
PRKACA	PRKX	0.573
TNFRSF10C	TRADD	0.573
ATG7	PRKCD	0.574
BIRC3	TNFSF10	0.574
ATM	RIPK1	0.576
ATG7	BCL2L1	0.577
CASP2	DFFB	0.577
AKT1	IGF1R	0.578
AKT1	GSN	0.578
NLRP1	TLR4	0.58
FAS	XIAP	0.582
AKT1	BIRC3	0.583
ATM	CASP2	0.583
MAPK3	MYD88	0.583
MCL1	NFKBIA	0.585
AKT1	CASP1	0.586
CFLAR	NFKB1	0.587
ATG14	PIK3CD	0.589
ELANE	TLR4	0.59
CASP1	IRF1	0.593
UBC	YWHAZ	0.593
BIRC2	NFKB1	0.594
MCL1	TNFSF10	0.594
ATG14	BCL2L1	0.595
ATG14	WDR45	0.597
BCL2L11	STAT3	0.597
CASP1	FAS	0.597
AKT1	BIRC2	0.599
BCL2L1	TRADD	0.599
CFLAR	IL1B	0.6
DFFB	KPNB1	0.6
RPS27A	VPS37C	0.6
UBC	VPS37C	0.6
CHMP7	RPS27A	0.601
TNFRSF25	TNFSF10	0.601
BCL2L1	IKBKB	0.602
DYNC1H1	RPS27A	0.602
DYNC1LI1	RPS27A	0.603
DYNC1LI2	RPS27A	0.603
FAS	MCL1	0.603
BCL2L1	IL1B	0.604
CASP8	MAP3K1	0.606
RPS27A	UBAP1	0.606
ATG14	DYNLL1	0.608
CHMP7	UBC	0.608
DYNC1LI1	TUBB1	0.608
DYNC1LI1	TUBB6	0.608
DYNC1LI2	TUBB1	0.608
DYNC1LI2	TUBB6	0.608
DYNC1LI2	TUBB4B	0.608
DYNC1LI1	UBC	0.609
DYNC1LI2	UBC	0.609
FUNDC1	MFN1	0.609
BID	BOK	0.61
DYNC1LI2	TUBA1A	0.61
LAMP2	RPS27A	0.61
MAP3K14	NFKBIA	0.61
CD14	RIPK1	0.611
IGF1R	YWHAZ	0.611
CASP1	TNFSF10	0.612
CASP4	XIAP	0.612
BIRC3	MYD88	0.613
BIRC3	TNFRSF10B	0.613
DYNC1H1	UBC	0.613
ATG9A	WDR45	0.614
AKT1	TNFRSF10B	0.615
CARD8	CASP4	0.615
CHUK	STAT3	0.616
ELANE	TUBB1	0.616
ATM	IKBKB	0.617
GABARAPL2	LAMP2	0.617
CD14	TRAF3	0.618
CD14	IKBKG	0.618
CHMP2B	RPS27A	0.618
IL1B	PRF1	0.622
LAMP2	UBC	0.622
IRF1	TLR4	0.623
MYD88	TRADD	0.623
CASP8	MYD88	0.624
CASP8	CD14	0.625
CASP1	TNFRSF1A	0.626
CHMP2B	UBC	0.626
CASP8	STAT3	0.627
IL1B	RIPK1	0.627
BNIP3L	WIPI2	0.628
DYNC1LI1	TUBA1A	0.628
CASP2	MCL1	0.63
LAMTOR4	YWHAB	0.63
VIM	YWHAZ	0.63
STAT3	XIAP	0.631
DYNLL1	UBC	0.632
CSF2RB	TLR4	0.635
RRAGC	YWHAB	0.636
CD14	CHUK	0.637
IRF1	NFKBIA	0.637
MYD88	RIPK1	0.637
PRF1	TNFSF10	0.637
DYNLL1	RPS27A	0.638
CASP1	RIPK1	0.639
PRKCD	YWHAZ	0.639
TUBB4B	YWHAZ	0.639
CD14	IKBKB	0.64
DYNC1LI1	TUBB4B	0.642
MAP3K14	MYD88	0.643
ATG7	BNIP3L	0.647
IRAK4	TNFRSF1A	0.648
CFLAR	NFKBIA	0.649
MAP2K4	RPS27A	0.65
TUBB4B	YWHAB	0.65
BCL2L1	TNFRSF1A	0.651
BCL2L1	TNFSF10	0.651
IRF1	NFKB1	0.651
MAPK1	TNFRSF1A	0.651
MAP2K4	UBC	0.653
MCL1	PINK1	0.654
RRAGB	YWHAB	0.658
MAPK3	MCL1	0.659
BCL2L11	CFLAR	0.66
AKT1S1	TSC1	0.661
BIRC3	MCL1	0.662
CASP2	CASP8	0.663
ATG4D	WIPI2	0.664
CD14	IL1B	0.666
AKT1S1	PRKAG2	0.667
IL1B	TNFRSF1B	0.667
CFLAR	IKBKB	0.668
LAMP2	PRKAG2	0.668
MTMR14	PIK3R2	0.669
FAS	PRF1	0.67
FUNDC1	OPA1	0.67
PIK3R2	YWHAZ	0.67
CASP1	NFKBIA	0.672
CASP8	DFFB	0.672
MAP1LC3B	TNFRSF10B	0.674
NFKB1	UBE2V1	0.674
ELANE	IL1B	0.675
TNFSF10	XIAP	0.675
LAMP2	RRAGB	0.676
BIRC2	MCL1	0.677
MTMR3	PIK3R2	0.677
PIK3CD	YWHAZ	0.677
TLR4	TNFRSF1A	0.677
NFKBIA	TRAF3	0.678
MAPK1	MCL1	0.68
LAMP2	PLIN3	0.681
NFKBIA	XIAP	0.681
BIRC2	TNFRSF10B	0.683
CAPN2	CASP8	0.684
BIRC5	CASP2	0.685
ATG14	LAMP2	0.686
IL1B	IRF1	0.686
AKT1	TNFRSF1A	0.687
AKT1	MYD88	0.688
AKT2	MAP3K14	0.691
NFKB1	UBC	0.691
BCL2L1	FAS	0.692
DYNC1H1	TUBB1	0.695
MAPK1	PAK2	0.696
BCL2L1	NFKBIA	0.698
ATG7	WDR45	0.701
NFKB1	RPS27A	0.702
ATG14	ATG4D	0.704
MYD88	TNFRSF1A	0.705
NFKBIA	TRADD	0.705
IKBKB	RPS27A	0.706
NFKBIA	STAT3	0.706
ATM	MAP1LC3B	0.707
MAP2K4	NFKB1	0.707
ATG7	MAPK1	0.708
IKBKG	IL1B	0.708
PRF1	TLR4	0.708
DAPK2	YWHAB	0.71
ATG7	UBC	0.711
STAT3	YWHAZ	0.711
BCL2L11	TNFRSF10B	0.712
CASP1	XIAP	0.712
IL1B	MAPK3	0.712
E2F1	XIAP	0.713
NFKBIA	UBC	0.713
MCL1	TNFRSF10B	0.715
CFLAR	TNFRSF10C	0.719
GABARAPL2	PINK1	0.72
STAT3	TFDP1	0.72
ATG14	PIK3R5	0.721
AKT1	ATG7	0.723
ATG7	RPS27A	0.723
IKBKB	UBC	0.723
CASP4	SCAF11	0.724
BIRC3	CASP1	0.726
CASP2	XIAP	0.726
ATG9A	PINK1	0.727
BIRC3	BIRC5	0.727
DYNC1H1	TUBB6	0.727
AKT1	MAP1LC3B	0.728
BCL2L11	XIAP	0.729
IKBKB	IL1B	0.73
AKT1S1	LAMTOR4	0.731
ATG7	LAMP2	0.732
IKBKB	STAT3	0.737
AKT1	PINK1	0.738
BCL2L1	TNFRSF10B	0.741
AKT1	TLR4	0.742
TRAF3	YWHAZ	0.742
AKT1	ATM	0.745
BCL2L1	BIRC3	0.746
BIRC2	CASP1	0.747
ATG9A	MAP1LC3B	0.749
IRF1	PSMB9	0.75
ATG7	MAPK3	0.752
MAP3K1	NFKB1	0.752
KPNB1	PSMD12	0.753
ATG7	BCL2L11	0.755
BIRC2	MAP3K1	0.755
BIRC3	IRF1	0.755
CASP8	NFKBIA	0.756
BCL2L1	BIRC2	0.758
MYD88	STAT3	0.76
IL1B	NLRP1	0.761
BCL2L1	CASP2	0.763
BIRC3	NFKBIA	0.763
MAP2K4	PAK2	0.763
AKT1	CASP8	0.766
ATG4D	ATG9A	0.767
ATG9A	GABARAPL2	0.767
TNFRSF10B	XIAP	0.768
BCL2L1	MFN1	0.772
BIRC2	NFKBIA	0.772
BIRC3	RPS27A	0.772
BCL2L11	BOK	0.775
CHUK	IL1B	0.776
AKT1	IL1B	0.777
STAT3	TLR4	0.777
CASP2	NLRP1	0.778
E2F1	STAT3	0.779
FUNDC1	PINK1	0.78
CASP4	NLRP1	0.782
CFLAR	CHUK	0.782
IRAK4	NFKBIA	0.782
BCL2L11	CASP8	0.783
CHUK	TRAF1	0.783
CFLAR	MCL1	0.784
PRKACA	PRKAG2	0.785
TUBA1A	YWHAZ	0.786
NFKBIA	UBE2V1	0.787
BIRC3	NFKB1	0.788
CASP1	CFLAR	0.788
TNFRSF1A	TNFSF10	0.788
PLEC	VIM	0.79
PRKAG2	PRKAR1A	0.791
BIRC2	UBE2V1	0.792
BCL2L1	CASP1	0.796
MAP3K1	MAPK3	0.796
MAPK3	PAK2	0.796
CASP8	TNFRSF10D	0.799
FAS	TNFRSF10B	0.802
IRAK4	UBE2V1	0.802
CASP8	TNFRSF10C	0.804
CFLAR	TNFRSF1A	0.804
DAPK1	DAPK2	0.804
AKT1S1	PRKACA	0.805
CFLAR	IKBKG	0.806
ATG14	MAP1LC3B	0.807
BNIP3L	PINK1	0.808
CASP5	IL1B	0.81
DP2	TFDP1	0.81
CFLAR	TNFRSF10D	0.811
CASP8	MAP1LC3B	0.812
TRAF1	XIAP	0.812
PIK3R2	TLR4	0.814
NFKBIA	PRKACA	0.819
BIRC2	E2F1	0.82
AKT1	BCL2L11	0.822
GABARAPL2	PRKACA	0.824
IKBKG	XIAP	0.824
CASP8	MCL1	0.825
IKBKG	TRAF1	0.826
MAP1LC3B	MFN1	0.826
MAPK3	TLR4	0.826
BIRC3	MAP3K1	0.829
CASP1	MYD88	0.829
LAMP2	MAP1LC3B	0.829
AKT1	CFLAR	0.831
DYNC1H1	TUBB4B	0.834
IKBKG	UBE2V1	0.835
AKT2	IKBKG	0.836
PIK3R2	PRKCD	0.836
BIRC2	CASP2	0.837
CHUK	XIAP	0.837
IL1B	TNFRSF1A	0.837
TRADD	XIAP	0.837
IRAK4	TRAF3	0.838
NFKBIA	TLR4	0.84
AKT1	NFKBIA	0.841
AKT2	IKBKB	0.841
IKBKB	XIAP	0.841
TNFRSF1A	XIAP	0.845
CASP8	TLR4	0.846
BIRC3	UBE2V1	0.851
IKBKB	TRAF1	0.851
DAPK2	MAPK1	0.852
ATG4D	ATG7	0.853
IGF1R	YWHAB	0.854
MAP1LC3B	PINK1	0.855
AKT2	MAP2K4	0.856
DAPK2	MAPK3	0.857
MAP3K1	NFKBIA	0.857
IKBKB	TRAF3	0.859
TNFRSF10B	TNFRSF10D	0.859
PIK3CD	PRKCD	0.86
STAT3	TNFRSF1A	0.86
CARD8	IKBKG	0.862
BIRC2	RPS27A	0.863
MCL1	XIAP	0.863
UBAP1	UBC	0.866
BNIP3L	FUNDC1	0.867
MAPK1	PRKACA	0.867
NFKBIA	RIPK1	0.867
PIK3CD	TLR4	0.867
RPS27A	UBE2V1	0.869
ATG7	PINK1	0.87
MAPK3	PRKACA	0.87
NFKBIA	NFKBIE	0.871
AKT2	PIK3R5	0.873
CASP1	TLR4	0.875
UBC	UBE2V1	0.878
TNFRSF1A	TRAF3	0.88
AKT2	BCL2L1	0.881
CFLAR	XIAP	0.881
IL1B	NFKBIA	0.882
DAPK1	MAPK1	0.883
FAS	TNFSF10	0.883
NFKB1	STAT3	0.883
BIRC3	UBC	0.885
RIPK1	TLR4	0.885
AKT2	PIK3R2	0.886
IRF1	MYD88	0.886
AKT2	MAPK1	0.887
BID	CASP1	0.888
AKT2	MAPK3	0.89
BIRC3	CHUK	0.891
PSMB8	PSMF1	0.891
ATG9A	YWHAZ	0.892
BCL2L1	CFLAR	0.893
BIRC2	BIRC5	0.893
CASP4	CASP5	0.894
AKT1	MAPK1	0.895
BIRC2	IKBKB	0.895
AKT1	PIK3R5	0.896
AKT2	PIK3CD	0.897
BID	CAPN2	0.897
PSMB9	PSMD9	0.897
MAP3K1	MAPK1	0.898
CASP2	MAP3K14	0.9
CD14	RPS27A	0.9
CD14	UBC	0.9
CHMP2B	TUBB6	0.9
CHMP7	GABARAPL2	0.9
CHMP7	TUBB1	0.9
CHMP7	PLIN3	0.9
CHMP7	TUBA1A	0.9
CHMP7	TUBB6	0.9
CRADD	MAP3K14	0.9
CSF2RB	PRKACA	0.9
DYNLL1	PRKAG2	0.9
IRF4	VIM	0.9
MAP3K14	PSMF1	0.9
PAK2	PSMF1	0.9
PAK2	UBC	0.9
PAK2	PSMB9	0.9
PLIN3	PRKAG2	0.9
PLIN3	UBAP1	0.9
ATG14	PRKAG2	0.901
CD14	UBE2V1	0.901
CHMP2B	PLIN3	0.901
CHMP2B	TUBB4B	0.901
DBNL	MAP3K1	0.901
LAMTOR4	PRKAG2	0.901
PSMB10	PSMF1	0.901
BIRC2	CD14	0.902
CHMP2B	TUBA1A	0.902
CHMP7	MAP1LC3B	0.902
CHMP7	TUBB4B	0.902
MAP3K14	PSMD12	0.902
MAP3K14	PSMB10	0.902
NFKB1	PSMF1	0.902
NFKBIA	PSMF1	0.902
BIRC3	CD14	0.903
MAP3K14	PSMB9	0.903
MAP3K14	PSMB8	0.903
MAP3K14	PSME4	0.903
PRKAG2	TSC1	0.903
BCL2L11	MAPK1	0.904
CHMP7	VPS37C	0.904
CRADD	MAP2K4	0.904
PAK2	PSME4	0.904
PRKAG2	RRAGC	0.904
CHMP2B	TUBB1	0.905
MAP3K14	PSMB3	0.905
PAK2	RPS27A	0.905
AKT1	MAPK3	0.906
ATG14	ATG7	0.906
BCL2L1	PRKACA	0.906
PAK2	PSMB8	0.906
PAK2	PSMB10	0.906
PAK2	PSMD9	0.906
BIRC5	UBC	0.907
IL1RAP	NFKB1	0.907
MAP3K14	RPS27A	0.907
MAP3K14	TNFRSF25	0.907
MAP3K14	PSMD9	0.907
NFKB1	PSME4	0.907
ATM	RPS27A	0.908
BCL2L1	XIAP	0.908
IRF1	STAT3	0.908
PSMD9	UBC	0.908
RPS27A	TLR4	0.908
ATG9A	WIPI2	0.909
ATM	CASP8	0.909
BCL2L1	PRKAR1A	0.909
BIRC5	RPS27A	0.909
NFKBIA	PSME4	0.909
PAK2	PSMD12	0.909
PSMD12	PSMF1	0.909
TNFRSF10C	TNFRSF10D	0.909
ATG7	UBE2V1	0.91
CHMP7	UBAP1	0.91
IGF1R	PRKACA	0.91
PPP3R1	YWHAZ	0.91
MAP2K4	RIPK1	0.911
MCL1	VIM	0.911
NFKBIA	RPS27A	0.911
PSMF1	RPS27A	0.911
CARD8	NLRP1	0.912
MAP2K4	UBE2V1	0.912
NFKBIE	UBC	0.912
PPP3R1	YWHAB	0.912
PSMB10	PSMD9	0.912
PSMD9	PSMF1	0.912
PSME4	RPS27A	0.912
PSMF1	UBC	0.912
RPS27A	TRADD	0.912
ATG7	ATG9A	0.913
ATM	TFDP1	0.913
NFKBIA	PSMB3	0.913
TLR4	UBC	0.913
AKT1	LAMTOR4	0.914
MAP3K1	TNFSF10	0.914
MAP3K1	TNFRSF10B	0.914
PLIN3	VPS37C	0.914
TRADD	UBC	0.914
AKT1	MAP3K14	0.915
BIRC3	MAP2K4	0.915
CHUK	RPS27A	0.915
FAS	MAP2K4	0.915
IRF4	PSMB8	0.915
MAP3K1	RIPK1	0.915
MAP3K14	TNFRSF1B	0.915
NFKBIA	PSMD12	0.915
NFKBIE	RPS27A	0.915
AKT1	PIK3R2	0.916
ATM	UBC	0.916
CASP1	CASP8	0.916
CHUK	UBC	0.917
CRADD	TRAF1	0.917
IGF1R	PIK3CD	0.917
MFN1	RPS27A	0.917
NFKB1	PSMD9	0.917
TNFRSF10B	TNFRSF10C	0.917
NFKBIA	PSMD9	0.918
PAK2	PSMB3	0.918
BIRC3	IKBKB	0.919
MAP2K4	PRKCD	0.919
PSMB8	PSMD9	0.919
MAPK1	TNFSF10	0.92
NFKB1	PSMB9	0.92
NFKB1	PSMB10	0.92
NFKB1	TLR4	0.92
PSME4	UBC	0.92
BID	TNFRSF25	0.921
CHMP2B	MAP1LC3B	0.921
MAPK1	TSC1	0.921
NFKB1	PSMD12	0.921
CSF2RB	IKBKB	0.922
IRF2	IRF4	0.922
ATM	BID	0.923
BID	CRADD	0.923
CHMP2B	GABARAPL2	0.923
IKBKG	MAP2K4	0.923
MAP2K4	TRADD	0.923
IRF2	PSMB8	0.924
MFN1	UBC	0.924
IRF1	IRF4	0.925
MAPK3	PRKAR1A	0.925
PSMB3	PSMF1	0.925
BCL2L1	YWHAZ	0.926
FAS	IKBKG	0.926
CHUK	FAS	0.927
IKBKB	IRAK4	0.927
IL1B	TLR4	0.927
NFKB1	PSMB8	0.927
RPS27A	TNFRSF1A	0.927
BIRC3	CRADD	0.928
FAS	IKBKB	0.928
IGF1R	PIK3R2	0.928
MAP3K1	PAK2	0.928
MAP3K14	UBC	0.928
AKT2	CHUK	0.929
CHUK	IRAK4	0.929
IGF1R	STAT3	0.929
IKBKB	TNFSF10	0.929
IKBKG	TNFSF10	0.929
LAMTOR4	TSC1	0.929
MAP2K4	TNFRSF1A	0.929
MAPK3	TNFSF10	0.929
NFKB1	PRKACA	0.929
PLEC	RPS27A	0.929
PRKAG2	RRAGB	0.929
TLR4	UBE2V1	0.929
BID	BIRC3	0.93
CASP8	VIM	0.93
CHUK	TNFRSF10B	0.93
IKBKB	TNFRSF10B	0.93
IKBKG	TNFRSF10B	0.93
MAP3K1	TNFRSF1B	0.93
RIPK1	UBE2V1	0.93
CHUK	TNFSF10	0.931
MAP3K14	MAPK1	0.931
MAP3K14	TRADD	0.931
PSMD9	RPS27A	0.931
STAT3	VIM	0.931
TRAF3	UBC	0.931
ATG14	WIPI2	0.932
CHMP2B	VPS37C	0.932
NFKB1	NFKBIE	0.932
NFKBIA	PSMB10	0.932
BID	RIPK1	0.933
BIRC2	BIRC3	0.933
MAPK1	PRKAR1A	0.933
NFKBIA	PSMB9	0.933
AKT1	MAP2K4	0.934
MAP3K1	TLR4	0.934
MAP3K14	TNFRSF1A	0.934
PSMB10	UBC	0.934
STAT3	TNFRSF1B	0.934
IGF1R	MAPK1	0.935
IRF1	IRF2	0.935
MAP3K1	MYD88	0.935
MAP3K14	RIPK1	0.935
IRF4	MCL1	0.936
MAPK3	YWHAZ	0.936
MAPK3	YWHAB	0.936
NFKB1	PSMB3	0.936
PPP3CA	PPP3CB	0.936
CASP1	CASP5	0.937
MAP3K1	TRADD	0.937
MAPK3	TSC1	0.937
NFKBIA	PSMB8	0.937
PSMB8	UBC	0.937
RPS27A	TRAF3	0.937
DYNLL1	NFKBIA	0.938
IL1B	STAT3	0.938
PSMB10	RPS27A	0.938
PSMB8	RPS27A	0.938
PSMD9	PSME4	0.938
TNFRSF1A	UBC	0.938
TSC1	YWHAZ	0.938
AKT1	PIK3CD	0.939
IGF1R	MAPK3	0.939
IGF1R	PRKCD	0.939
PIK3R2	PIK3R5	0.939
AKT1	IRF4	0.94
BCL2L11	MAPK3	0.94
BID	CASP2	0.94
IKBKG	RPS27A	0.94
NFKB1	TRADD	0.94
CHMP2B	UBAP1	0.941
MAP3K14	MAPK3	0.941
MAPK1	YWHAB	0.941
BIRC3	IKBKG	0.942
BIRC2	CHUK	0.943
BIRC3	TLR4	0.943
BNIP3L	MAP1LC3B	0.943
CSF2RB	YWHAZ	0.943
GABARAPL2	MAP1LC3B	0.943
MAPK3	NFKB1	0.943
PSMB9	UBC	0.943
AKT1	RRAGC	0.944
BCL2L1	MAPK1	0.944
BID	TRADD	0.944
BIRC2	TLR4	0.944
PINK1	RPS27A	0.944
PSMB9	RPS27A	0.944
PSME4	PSMF1	0.944
RIPK1	TNFRSF1B	0.944
MAP3K1	TRAF1	0.945
MAPK1	NFKB1	0.945
NFKBIA	PRKCD	0.945
AKT1	RRAGB	0.946
BIRC3	FAS	0.946
CASP8	NFKB1	0.946
NFKB1	PRKCD	0.946
PSMB3	PSMD9	0.947
BID	TNFSF10	0.948
BIRC5	XIAP	0.948
CAPN2	MAPK3	0.948
CASP2	YWHAZ	0.948
MAPK1	PRKCD	0.948
MYD88	UBE2V1	0.948
CASP2	TRADD	0.949
MAPK1	NFKBIA	0.949
PRKACA	YWHAZ	0.949
RIPK1	RPS27A	0.949
RIPK1	TNFRSF25	0.949
BIRC2	FAS	0.95
CHUK	UBE2V1	0.95
DAPK1	MAPK3	0.95
IKBKB	UBE2V1	0.95
MAPK1	YWHAZ	0.95
OPA1	PINK1	0.95
AKT1	E2F1	0.951
NFKB1	TRAF1	0.951
RPS27A	XIAP	0.951
BCL2L11	BID	0.952
IKBKB	TSC1	0.952
NFKB1	TNFRSF1A	0.952
BIRC3	MAP3K14	0.953
BIRC3	XIAP	0.953
MAPK3	PRKCD	0.953
NFKB1	RIPK1	0.953
AKT1S1	RRAGB	0.954
PSMB9	PSMF1	0.954
AKT1	XIAP	0.955
BID	TNFRSF1A	0.955
CASP8	MAP3K14	0.955
BIRC5	STAT3	0.956
CASP4	IL1B	0.956
DYNC1LI1	DYNC1LI2	0.956
TUBA1A	TUBB6	0.956
CASP8	PLEC	0.957
TRAF1	TRAF3	0.957
AKT1	NFKB1	0.958
CAPN2	MAPK1	0.958
AKT1S1	YWHAB	0.959
CASP2	TRAF1	0.959
IRF1	PSMB8	0.96
TNFSF10	TRADD	0.96
ATG7	WIPI2	0.961
AKT1	YWHAB	0.962
AKT1	VIM	0.962
CSF2RB	STAT3	0.962
RIPK1	XIAP	0.962
BID	TNFRSF10B	0.963
CASP8	MAPK1	0.963
CRADD	TNFRSF1A	0.963
IKBKB	RIPK1	0.963
AKT2	TSC1	0.964
ATM	E2F1	0.964
CASP2	RIPK1	0.964
CASP8	CRADD	0.964
IKBKG	TLR4	0.964
NFKBIA	TRAF1	0.964
PSMB10	PSME4	0.964
RRAGB	TSC1	0.964
BIRC3	CASP2	0.965
CASP1	CASP4	0.965
CASP8	TNFRSF25	0.965
CHMP2B	CHMP7	0.965
CHUK	RIPK1	0.965
CRADD	TRADD	0.965
IKBKB	TRADD	0.965
MYD88	NFKBIA	0.965
TUBA1A	TUBB1	0.965
BCL2L1	MCL1	0.966
BIRC3	TNFRSF1B	0.966
CHUK	TLR4	0.966
DYNC1LI1	DYNLL1	0.966
IL1RAP	IRAK4	0.966
MAP3K1	TNFRSF1A	0.966
PRKAR1A	PRKX	0.966
TSC1	YWHAB	0.966
BCL2L1	MAPK3	0.967
FUNDC1	GABARAPL2	0.967
IKBKB	NFKBIE	0.967
IL1B	NFKB1	0.967
BCL2L1	BNIP3L	0.968
CRADD	RIPK1	0.968
TUBA1A	TUBB4B	0.968
CASP8	IKBKB	0.969
CFLAR	TRAF1	0.969
RRAGC	TSC1	0.969
AKT1S1	YWHAZ	0.97
CASP8	XIAP	0.97
AKT1	IKBKG	0.971
AKT1S1	AKT2	0.971
CD14	MYD88	0.971
IKBKB	TLR4	0.971
IL1B	IRAK4	0.971
IKBKG	NFKBIE	0.972
MAP1LC3B	WIPI2	0.972
MAPK3	NFKBIA	0.972
RIPK1	UBC	0.972
TNFRSF1B	TRAF3	0.972
CHUK	TRADD	0.973
IKBKG	IRAK4	0.973
MYD88	NFKB1	0.973
AKT1	AKT2	0.974
BCAP31	BCL2L1	0.974
CHUK	NFKBIE	0.974
NFKBIA	TNFRSF1A	0.974
PSMD12	PSME4	0.974
UBAP1	VPS37C	0.974
AKT1	MCL1	0.975
CASP8	IL1B	0.975
CHUK	MAP3K1	0.975
FAS	TNFRSF1A	0.975
IKBKB	MAP3K1	0.975
IKBKG	MYD88	0.975
RIPK1	TNFSF10	0.975
ATG14	GABARAPL2	0.976
BCL2L1	CASP8	0.976
BCL2L1	PINK1	0.976
BOK	MCL1	0.976
CASP2	TNFRSF1A	0.976
ATG4D	MAP1LC3B	0.977
DYNC1LI2	DYNLL1	0.977
MCL1	STAT3	0.977
PSMB8	PSME4	0.977
RIPK1	TNFRSF10B	0.977
CFLAR	TRADD	0.978
DYNC1H1	TUBA1A	0.978
TNFRSF1B	TRADD	0.978
CARD8	CASP5	0.979
IKBKG	MAP3K1	0.979
MFN1	OPA1	0.979
BIRC2	TNFRSF1B	0.98
BNIP3L	GABARAPL2	0.98
CASP8	MAPK3	0.98
RIPK1	TRAF3	0.98
ATG14	ATG9A	0.982
BID	FAS	0.982
IKBKB	MYD88	0.982
IKBKG	NFKB1	0.982
MAP3K1	TRAF3	0.982
UBC	XIAP	0.982
AKT1	IKBKB	0.983
BIRC3	CFLAR	0.983
FAS	TRADD	0.983
GABARAPL2	WIPI2	0.983
IKBKG	TRADD	0.983
MAP3K14	TRAF1	0.983
PRKCD	STAT3	0.984
RIPK1	TRAF1	0.984
ATG4D	GABARAPL2	0.985
BCL2L1	STAT3	0.985
BIRC2	CFLAR	0.985
BIRC2	MAP3K14	0.985
FAS	RIPK1	0.985
MAPK3	STAT3	0.985
IKBKG	UBC	0.986
CASP8	CHUK	0.987
IKBKG	TRAF3	0.987
RPS27A	UBC	0.987
AKT1	STAT3	0.988
BIRC2	UBC	0.988
CASP8	TRAF1	0.988
MAPK1	MAPK3	0.988
PIK3CD	PIK3R5	0.988
BIRC2	XIAP	0.989
CFLAR	TNFSF10	0.989
DP2	E2F1	0.989
IKBKB	MAP3K14	0.989
PSMD12	UBC	0.989
BCAP31	CASP8	0.99
BID	MCL1	0.99
BIRC3	CASP8	0.99
PSMB3	UBC	0.99
PSMD12	PSMD9	0.99
TNFRSF10B	TRADD	0.99
YWHAB	YWHAZ	0.99
AKT1	CHUK	0.991
AKT1	YWHAZ	0.991
AKT1S1	RRAGC	0.991
CHUK	TRAF3	0.991
IKBKG	MAP3K14	0.991
IL1B	MYD88	0.991
IRF4	MYD88	0.991
TRADD	TRAF3	0.991
AKT1	AKT1S1	0.992
BIRC3	TRADD	0.992
CHUK	IKBKB	0.992
CHUK	MAP3K14	0.992
IRAK4	TLR4	0.992
MAP2K4	MAP3K1	0.992
PSMB10	PSMD12	0.992
PSMB3	RPS27A	0.992
MFN1	PINK1	0.993
PINK1	UBC	0.993
PSMD12	RPS27A	0.993
BCL2L1	BID	0.994
BID	CASP8	0.994
CASP8	IKBKG	0.994
CHUK	MYD88	0.994
DYNC1H1	DYNLL1	0.994
IRF4	STAT3	0.994
PSMB9	PSME4	0.994
TLR4	TRAF3	0.994
BIRC3	TNFRSF1A	0.995
MAP3K14	TRAF3	0.995
MYD88	TLR4	0.995
PIK3CD	PIK3R2	0.995
PSMB8	PSMD12	0.995
PSMB9	PSMD12	0.995
TNFRSF25	TRADD	0.995
BCL2L1	NLRP1	0.996
CARD8	CASP1	0.996
CFLAR	TNFRSF10B	0.996
CFLAR	FAS	0.996
MAPK1	STAT3	0.996
TNFRSF10C	TNFSF10	0.996
TNFRSF10D	TNFSF10	0.996
TNFRSF1A	TRAF1	0.996
TRADD	TRAF1	0.996
AKT1	TSC1	0.997
BIRC2	CASP8	0.997
BIRC2	IKBKG	0.997
CHUK	TNFRSF1A	0.997
FUNDC1	MAP1LC3B	0.997
IKBKB	TNFRSF1A	0.997
MYD88	TRAF3	0.997
PPP3CB	PPP3R1	0.997
PSMB10	PSMB8	0.997
PSMB3	PSME4	0.997
AKT1	BCL2L1	0.998
BIRC3	RIPK1	0.998
BIRC3	TRAF3	0.998
CASP5	NLRP1	0.998
CASP8	TNFSF10	0.998
CASP8	CFLAR	0.998
CFLAR	RIPK1	0.998
DYNC1H1	DYNC1LI1	0.998
IKBKG	TNFRSF1A	0.998
TNFRSF1A	TNFRSF1B	0.998
ATG7	GABARAPL2	0.999
ATG7	MAP1LC3B	0.999
ATM	IKBKG	0.999
BCL2L1	BCL2L11	0.999
BCL2L11	MCL1	0.999
BCL2L11	DYNLL1	0.999
BIRC2	TNFRSF1A	0.999
BIRC2	RIPK1	0.999
BIRC2	TRADD	0.999
BIRC2	TRAF1	0.999
BIRC2	TRAF3	0.999
BIRC3	TRAF1	0.999
CASP1	IL1B	0.999
CASP1	NLRP1	0.999
CASP2	CRADD	0.999
CASP8	TNFRSF1A	0.999
CASP8	RIPK1	0.999
CASP8	TNFRSF10B	0.999
CASP8	TRADD	0.999
CASP8	FAS	0.999
CD14	TLR4	0.999
CHUK	NFKBIA	0.999
CHUK	NFKB1	0.999
CHUK	IKBKG	0.999
DYNC1H1	DYNC1LI2	0.999
E2F1	TFDP1	0.999
IKBKB	NFKBIA	0.999
IKBKB	NFKB1	0.999
IKBKB	IKBKG	0.999
IKBKG	NFKBIA	0.999
IKBKG	RIPK1	0.999
IL1B	IL1RAP	0.999
IL1RAP	MYD88	0.999
IRAK4	MYD88	0.999
LAMTOR4	RRAGB	0.999
LAMTOR4	RRAGC	0.999
NFKB1	NFKBIA	0.999
PPP3CA	PPP3R1	0.999
PRKACA	PRKAR1A	0.999
PSMB10	PSMB9	0.999
PSMB10	PSMB3	0.999
PSMB3	PSMD12	0.999
PSMB3	PSMB9	0.999
PSMB3	PSMB8	0.999
PSMB8	PSMB9	0.999
RIPK1	TNFRSF1A	0.999
RIPK1	TRADD	0.999
RRAGB	RRAGC	0.999
TNFRSF10B	TNFSF10	0.999
TNFRSF1A	TRADD	0.999
TNFRSF1B	TRAF1	0.999
